# Supplementary material
Source: MDPI journal article supplement (https://www.mdpi.com/2311-7524/7/7/173)
Supplement: s1 [file s1]

Archive with 2 entries (2 files):
- Figure S1,2.pdf
- Table S1-4.xlsx
