# Supplementary material
Source: MDPI journal article supplement (https://www.mdpi.com/2311-7524/7/7/173)
Supplement: s1 [file s1 › Figure S1,2.pdf]

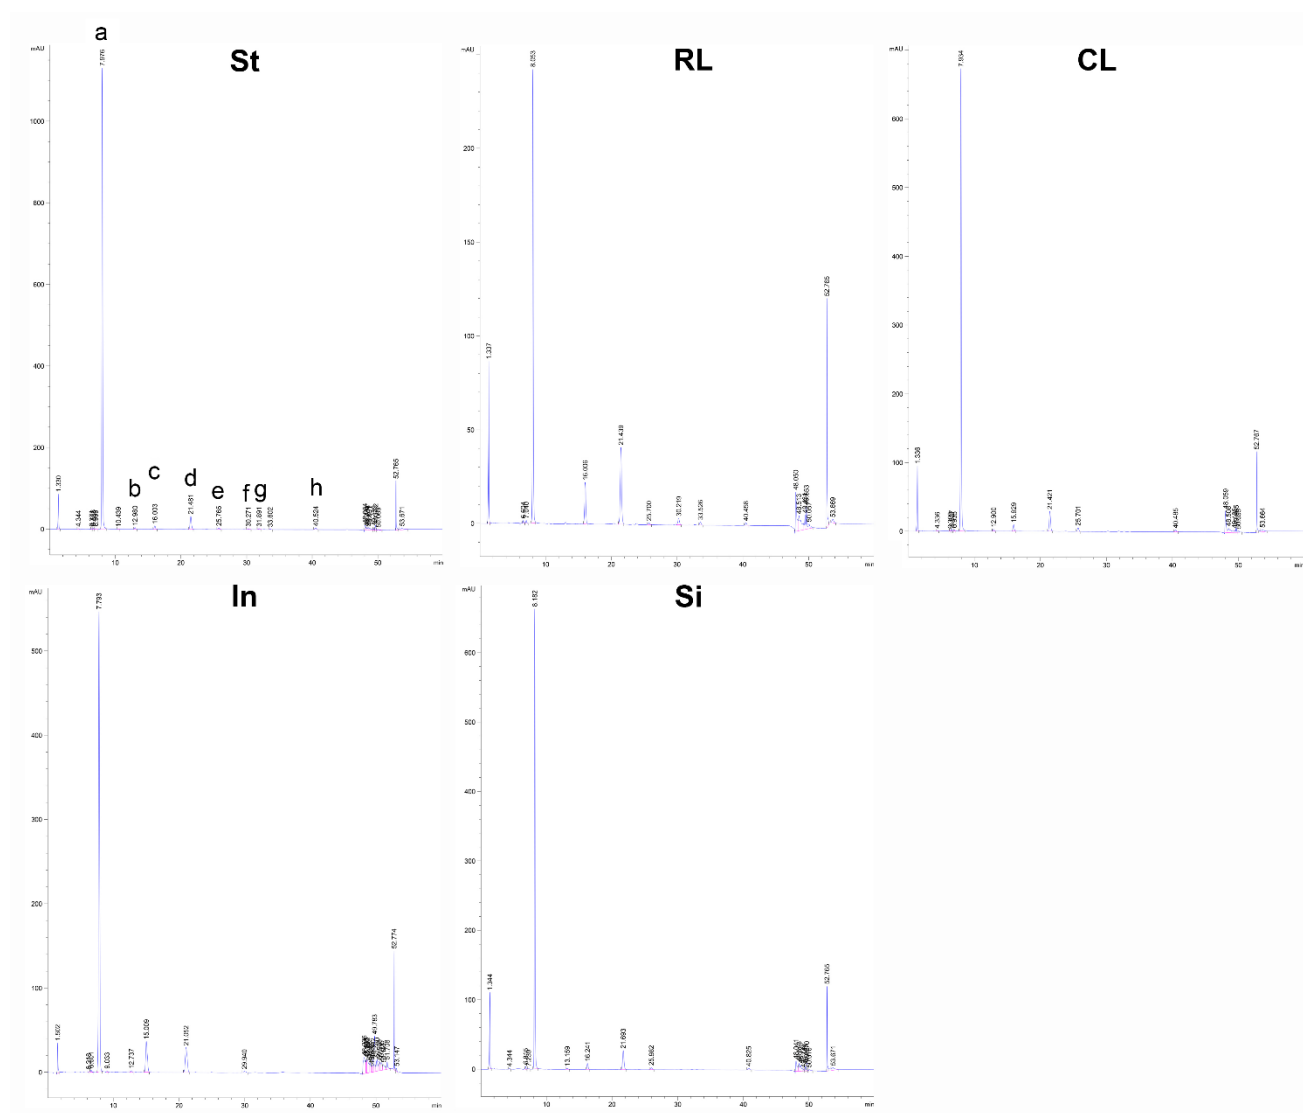

**Figure S1.** HPLC chromatograms of glucosinolates isolated from different organs of *Brassica nigra*. Peak numbers refer to the glucosinolates listed in Table 1. Peaks: (a), Sinigrin; (b), Gluconapin; (c), 4-OH-Glucobrassicin; (d), glucotropaeolin (internal standard); (e), Glucobrassicin; (f), Gluconasturtiin; (g), 4-Methoxy-Glucobrassicin; (h), 1-Methoxy-Glucobrassicin. St, stems; RL, rosette leaves; CL, cauline leaves; In, inflorescences; Si, siliques.

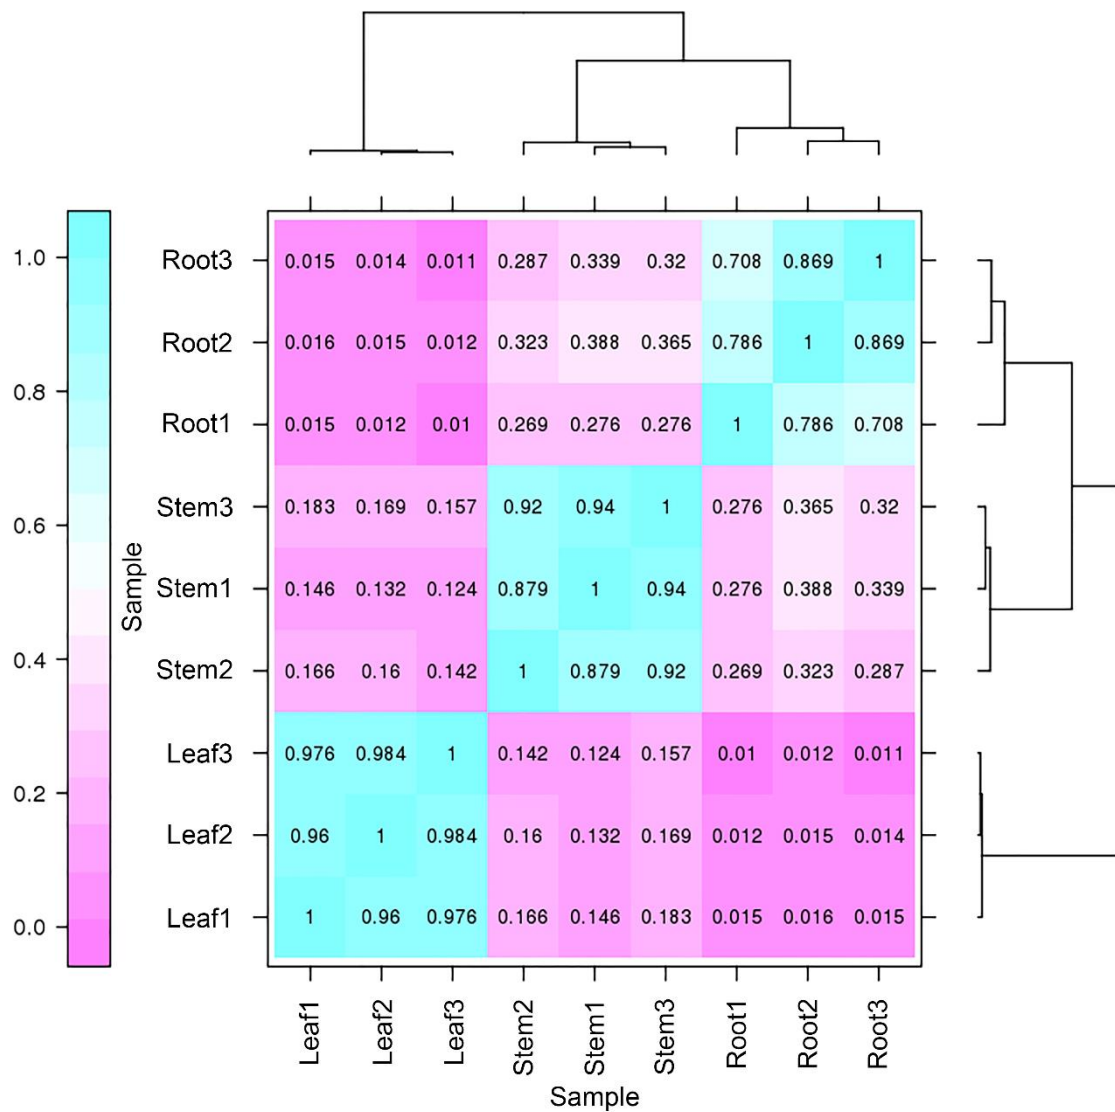

**Figure S2.** Correlation analysis of samples. Comparisons of gene expression between samples on the x-axis and those on the y-axis. The correlation coefficients between the three biological replicates of root, stem and leaf were approximately over 0.8. The color value indicated the value of the correlation coefficient.
