# Supplementary material
Source: MDPI journal article supplement (https://www.mdpi.com/2311-7524/7/7/173)
Supplement: s1 [file s1 › Table S1-4.xlsx]

## Sheet: Table S1
	Table S1. GSL genes reported in Brassica rapa and Brassica oleracea.
	Genes	Brassica rapa	Brassica oleracea
	OBP2	Bra031588; Bra030696;	Bol023400;Bol041144;Bol006511;
	IQD1	Bra034081;Bra001299	Bol023096;Bol033935;
	MYB28	Bra012961;Bra035929;Bra029311	Bol007795; Bol036286;Bol017019;Bol036743;
	MYB29	Bra009245; Bra005949	Bol008849;
	MYB34	Bra013000;Bra035954;Bra029350;Bra029349	Bol017062;Bol007760;Bol036262;
	MYB51	Bra025666;Bra031035;Bra016553	Bol013207;Bol030761;
	MYB122	Bra015939;Bra008131	Bol026204;
	TFL2		Bol021358;Bol000201;Bol019784;Bol034455;
	BCAT3	Bra017964;Bra029966
	BCAT4	Bra022448;Bra001761	Bol018130;Bol026690;
	BAT5	Bra029434;Bra000760;
	IPMI-LSU1	Bra032708;Bra040341;
	IPMI-SSU2	Bra004744;
	IPMDH1	Bra023450;
	MAM1	Bra013007;Bra029355;Bra018524;	Bol017071;Bol020647;Bol020646;Bol037823;Bol017070;
	MAM3	Bra013009;Bra013011;Bra029356;Bra021947;	Bol016496;
	CYP79A2	Bra009100;Bra028764;
	CYP79B2	Bra011821;Bra010644;Bra017871;	Bol032767;Bol028852; Bol018585;
	CYP79B3	Bra030246	Bol031784;
	CYP79F1	Bra026058;	Bol038222;
	CYP83A1	Bra032734;Bra016908;	Bol040365;Bol005188;
	CYP83B1	Bra034941	Bol033477;
	GSTF9	Bra021673;Bra022815;	Bol033376;Bol004624;
	GSTF10	Bra022816	Bol004625;
	GSTF11	Bra032010;	Bol000843;
	GSTU20	Bra003645	Bol021558;
	GGP1	Bra011201;Bra024068;Bra010282;Bra010283;	Bol033672;Bol018073;Bol012989;
	SUR1	Bra036490;Bra036703;	Bol038767;Bol038764;Bol038765;Bol029775;
	UGT74B1	Bra024634	Bol005786;
	UGT74C1	Bra005641;Bra021743;	Bol006450;Bol014127;
	ST5a	Bra008132;Bra015935;	Bol039395;Bol026200;
	ST5b	Bra015938;Bra015936;Bra003817;Bra003818;Bra003726;Bra027880;Bra027117;Bra027118;Bra027623;Bra031476	Bol026202;Bol026201;
	ST5c	Bra025668	Bol030757;
	FMOGS-OX2	Bra027035	Bol010993;
	FMOGS-OX5	Bra026988;Bra016787;	Bol029100;Bol031350;
	AOP1	Bra034182;Bra034181;Bra000847;
	AOP2	Bra034180;Bra000848;Bra018521;	Bol045938;Bol045939;Bol045940;
	GSL-OH	Bra021670;Bra021671;Bra022920;	Bol033373;Bol033374;
	CYP81F1		Bol028913;Bol028914;Bol017375;Bol017376;
	CYP81F2	Bra002747;Bra020459;Bra006830;	Bol016237;Bol014239;Bol026044;
	CYP81F3		Bol032711;Bol028919;
	CYP81F4		Bol032712;Bol032714;Bol028918;
	IGMT1		Bol007029;Bol020663;
	IGMT2		Bol007030;
	BZO1	Bra004132;Bra039743
	APK1	Bra039818;Bra013120;
	APK2	Bra011822;Bra010645;Bra017872;
	CHY1	Bra031802;Bra039968;Bra039975;Bra018392;
	GSH1_PAD2	Bra013675;Bra019333;Bra019332;
	AAO4	Bra015330;

## Sheet: Table S2
	Table S2. List of primers used for qRT-PCR.
	Gene Name	Forward Primer Sequences (5'-3')	Reverse Primer Sequences (5'-3')
	TIPS	TGAAGAGCAGATTGATTTGGCT	ACACTCCATTGTCAGCCAGTT
	BniBCAT4-1	TTACAGGACCGAAGATGGC	TTGATCGACGGAGGGATA
	BniMAM1-2	ATGAGAATTCACTAAACGGC	TTATACCACAGAGGAAATCTGTGA
	BniIIL1-1/2	TGGAGCAGGTGGAAAGAC	CATTCAAGCGAGCATAGGT
	BniIMD1	ACACAGGGCTGAATCCGA	CTTACTCTACTCGGCAAGCG
	BniBCAT3-1	CCGAGCCTACTAAGTCAGAAC	CATTGGAAGATACAGAGGAAGA
	BniCYP79F1	ACGCTGTGACAATGAGAATG	TTCTCCGCTGGTCCTAAC
	BniCYP83A1-2	GCAATTATCTTCTTCTTCCTCTCT	GTTGTGGGTTAAGCTGGCT
	BniUGT74C1-1	GCACGAGGACCCGATAC	GGCTAACCACAACTTTGAATATC
	BniSOT17	GTCCTTGCATCATCGCC	AGCCGTTTTGGTGAGGA
	BniFMOGS-OX1	TGGCAGAAGAATGTGGTTG	GCGGTAATGTTCAGGGTT
	BniAOP2-1	ATGATGCTGGTGATGGTGC	CAATGTCGCCATTTGCC
	BniAOP2-2	GATGATGGTGCCAATACGA	ACGTCACCCTTGGCATTAA
	BniMYB28-2	GCTTTTCCAATGGCTTCTCT	AGGGTACAACGGTGATTGAAG
	BniMYB29-1	ATGGGCTAACTACTTGAAACC	TCGCTATGACCGACCACT
	BniMYC3-1	ACCCTAGAAAAAACCCGTT	ATTCGGTTTCATCATCATCTT

## Sheet: Table S3
	Table S3 The DNA, CDS and amino acid sequences of glucosinolate biosynthesis related genes (BniGSLs) in Brassica nigra.
	Gene ID	DNA sequences	CDS sequences	Amino acid sequence
	BniB01g000830	ATGGCCAAGCTTATCTCGTTTCATGATGTGGCTAAACATAAGTGCAAGAACGATTGTTGGATTCTCATCCACGGAAAGGTCTCAACGAAAAATAAAGTTCTCTAAATCCTCTATTTTTAGCTATCCACCATTTTTATAAAACAAGTGAACTCCACAGGTTTATGACCTCAGCAGTTTCATGGACGAACATCCCGGCGGTGACAACGTTCTCCTCGCCGTCACCGGTACGTATAGTTAACCATTTGTTTAGTCCGGTCCGTTTTTTCTTTTGACCTTCTGTCGGTTTCTTAATAATCTTGTGACTTGTTGAAAAATAAAGGAAAGGACGCGTCGACTGATTTTGACGATGTGAACCACAGCAATGAAGCGAAAGACGCGATGAAGAAGTATTATATTGGT…	ATGGCCAAGCTTATCTCGTTTCATGATGTGGCTAAACATAAGTGCAAGAACGATTGTTGGATTCTCATCCACGGAAAGGTTTATGACCTCAGCAGTTTCATGGACGAACATCCCGGCGGTGACAACGTTCTCCTCGCCGTCACCGGAAAGGACGCGTCGACTGATTTTGACGATGTGAACCACAGCAATGAAGCGAAAGACGCGATGAAGAAGTATTATATTGGTGACGTTGACAAGTCGACTGTCCCGGTGACGGCGAAGTATATTCCGCCGTGGGAGAAGGAATCTACGGCTGAAACCACAAAAGATGAAGCTGGAAACAAGATGCTCGTATATTTGGTTCCTCTCTTGATTCTCAGCGTTGCTTTCTTTCTCAGATTCTACAACAACAACAAGCAG…	MAKLISFHDVAKHKCKNDCWILIHGKVYDLSSFMDEHPGGDNVLLAVTGKDASTDFDDVNHSNEAKDAMKKYYIGDVDKSTVPVTAKYIPPWEKESTAETTKDEAGNKMLVYLVPLLILSVAFFLRFYNNNKQTA-
	BniB01g003800	ATGAATGTGACCGATCCCTATTGTTTCACACTTGCTCTATTTTCCCTTACGTTGGTCTTGTCTCTCGCCATACGTTACTTGAGAAAACCAAAAGGTGATCATGAGCTTCCTCCGGGCCCAACGGGATGGCCGATCATTGGGAACTTGTTCCAAATGGTCAAGAACCGGCCAACTCACCTGTGGATCCACCGCGTCATGGAAGACATGCAAACGGAGATAGCTTGCTTCCGCTTCGCCGGCGCCCACGTCATCGCCGTAACATCAAGCGAGATTGCCCGAGAAGTGCTAAGGGAAAAAGACGAGGCTCTCGCAGACAGAGGTGACTCCTACTCAAGCAATCTCATAAGCCATGGCTACAAGGACATTATTTTCTCTCCATATGGAGAGAGTTGGAAGGTG…	ATGAATGTGACCGATCCCTATTGTTTCACACTTGCTCTATTTTCCCTTACGTTGGTCTTGTCTCTCGCCATACGTTACTTGAGAAAACCAAAAGGTGATCATGAGCTTCCTCCGGGCCCAACGGGATGGCCGATCATTGGGAACTTGTTCCAAATGGTCAAGAACCGGCCAACTCACCTGTGGATCCACCGCGTCATGGAAGACATGCAAACGGAGATAGCTTGCTTCCGCTTCGCCGGCGCCCACGTCATCGCCGTAACATCAAGCGAGATTGCCCGAGAAGTGCTAAGGGAAAAAGACGAGGCTCTCGCAGACAGAGGTGACTCCTACTCAAGCAATCTCATAAGCCATGGCTACAAGGACATTATTTTCTCTCCATATGGAGAGAGTTGGAAGGTG…	MNVTDPYCFTLALFSLTLVLSLAIRYLRKPKGDHELPPGPTGWPIIGNLFQMVKNRPTHLWIHRVMEDMQTEIACFRFAGAHVIAVTSSEIAREVLREKDEALADRGDSYSSNLISHGYKDIIFSPYGESWKVMKKVMVTKLMSPTTLNKTLGDRTLEADNIVTYIFNLCRLQSTTKSVVNVRDVALTYTHAVIMRMMFGQRHFEEPAEDGGLGQKEREHMDAIYQAIDCFFSSNISNYISCLRGWNIDGEEAKLREAVDIINRCNDPIIQERMHLWRNKGGKETEEDWLDTLITLKDDQGMPLFTLDEIRAQCKNINVAAIDNTMNNVEWTIAEMLNHQDILEKAINELDMVVGKDRLVQESDIPQLNYIKACSRESFRLHPVNAFMPPHGAIENTTL…
	BniB01g003820	ATGGAAGATGTCATCATTGGCGTGCTGGCTATCGCTGCAGTCTTCTTCCTCTACCAAAGAACAAAAACCAAACGGTACAAGCTGCCTCCGGGTCCAAAGGCACTTCCTGTCATCGGAAACCTGCACCAGCTTCAGAACCTTAACCCACAACGGTTCTTCTATGGATGGGCCAAAAAATACGGACCAATCTTGTCATACAAGATAGGAAGTAAAACAATGGTGGTGATATCTTCGGCTGAACTAGCCAAAGAGCTTCTTAAGACGCAAGACGCCAACTTCTCGGACCGGCCTCTCCACCGTGGCCAGGAGTTCATGTCCTATGGCCGACGTGACATGGCATTTCATCATTACACACCGTATTACCGGGACATAAGGAAGATGGGGATGAACCACTTGTTC…	ATGGAAGATGTCATCATTGGCGTGCTGGCTATCGCTGCAGTCTTCTTCCTCTACCAAAGAACAAAAACCAAACGGTACAAGCTGCCTCCGGGTCCAAAGGCACTTCCTGTCATCGGAAACCTGCACCAGCTTCAGAACCTTAACCCACAACGGTTCTTCTATGGATGGGCCAAAAAATACGGACCAATCTTGTCATACAAGATAGGAAGTAAAACAATGGTGGTGATATCTTCGGCTGAACTAGCCAAAGAGCTTCTTAAGACGCAAGACGCCAACTTCTCGGACCGGCCTCTCCACCGTGGCCAGGAGTTCATGTCCTATGGCCGACGTGACATGGCATTTCATCATTACACACCGTATTACCGGGACATAAGGAAGATGGGGATGAACCACTTGTTC…	MEDVIIGVLAIAAVFFLYQRTKTKRYKLPPGPKALPVIGNLHQLQNLNPQRFFYGWAKKYGPILSYKIGSKTMVVISSAELAKELLKTQDANFSDRPLHRGQEFMSYGRRDMAFHHYTPYYRDIRKMGMNHLFSPTRVATFKHVREEEARRMMDKIGVAADNSKPVDISELMLTFTNSVVCRQAFGKKYNEDGEEMKRFIKILYGSQSVFGKIFFSDFFPFTGYVLDDLTRLTAYMKECFERQDTYLQEIVDETLDPNRVKPETESMIDLLMEIYRDQPFASKFTLENVKAVVLDIVVAGTDTAAAAVVWGMTYLMKYPHVMKKAQAEVREYMRERGLTFVTEDDVKNLPYFRALVKETLRIEPVIPLLVPRCCIQDTKIAGYDIPAGTTVNVNAWAVS…
	BniB01g012360	ATGAGTGAAGCAAGCGGTCATGTGCTGGTGTTTCCTTATCCATTCCAAGGGCACATCAACCCAATGATTCAACTCTCTAAACGGTTATCCAAAAAGGGAGTCACCGTAACACTCATCATCGCCTCCAACAACCACCGTGAACCTTACACTTCCGACGACTATTCCATCACCGTCCACACAATACACGACGGTTTCCTCCCACACGAACCCCCTCAAACCAAGTTCAACGAACCTCAACGTTTCATTAATTCTACTACTCGCAGCCTCACGGATTTCATCTCTAGGTATGAATGTTTTGAACGAATTTTCCAGCTTGACATGTAAAGTTTATTTTTTATTTTTAAAGAAAAGTGGAAAGCTAAAAAAGTTCAAAGAACAAGAATATGATCTAAAAGCCAT…	ATGAGTGAAGCAAGCGGTCATGTGCTGGTGTTTCCTTATCCATTCCAAGGGCACATCAACCCAATGATTCAACTCTCTAAACGGTTATCCAAAAAGGGAGTCACCGTAACACTCATCATCGCCTCCAACAACCACCGTGAACCTTACACTTCCGACGACTATTCCATCACCGTCCACACAATACACGACGGTTTCCTCCCACACGAACCCCCTCAAACCAAGTTCAACGAACCTCAACGTTTCATTAATTCTACTACTCGCAGCCTCACGGATTTCATCTCTAGGGAGAAGTTAACGAGCAACCCTCCAAAAGCTCTGATCTATGATCCCTTCATGCCCTTTGCACTGGACGTAGCCAAGGATTTGGGTCTATACGTAGTAGCCTATTTCACTCAACCA…	MSEASGHVLVFPYPFQGHINPMIQLSKRLSKKGVTVTLIIASNNHREPYTSDDYSITVHTIHDGFLPHEPPQTKFNEPQRFINSTTRSLTDFISREKLTSNPPKALIYDPFMPFALDVAKDLGLYVVAYFTQPWLASLVYYHINEGTYDVPDDRHDNPTFASFPAFPLLSQNDLPSFAREKGSYPLLFELLVSQFCNLRLADLILCNTFDQLEPKVVKWMSDQWPVKNIGPAVPSKFLDNRLSEDKDYDLGDFQTEPDESVLRWLASKPARSVVYVAFGTLAALSEKQMKETAMAIRQTGYSFLWSVRDSERSKLPSGFVEEALEKDYGLVAKWVPQLEVLAHDSTGCFVTHCGWNSTLEALCLGVPLVGMPQWTDQPTNAKFIEDVWKIGVRAKTDEE…
	BniB01g013320	ATGGTGCTAAAGGTGTACGGACCTCACTTTGCTTCCCCGAAGCGTGCTCTCGTCACTCTTATCGAGAAGGGCGTCCCCTTCGAGACCGTCCCCGTCGATCTCATGAAAGGAGAGCACAAGCAGCCTGCTTATCTCGCCTTACAGCCTTTCGGCACCGTTCCTGCTGTTGTCGACGGTGACTACAAGATCTTCGGTACGTTATTACATCATAACCTCGATCTTCGTGTGATCAAACTAGCTCTGTTTTTTTTTAGCTCCGACCCAACTGAATCTGTGTTGCTTAATACATGATCTGAGATTCTTGATACAGTTTAGGCTTATTAGAAGTTTGATCTGAGATAAGACATGTATGGAAGATGTTATCTTGGTTCTTGTTTTGCTGTTATGTATCTATTGGAG…	ATGGTGCTAAAGGTGTACGGACCTCACTTTGCTTCCCCGAAGCGTGCTCTCGTCACTCTTATCGAGAAGGGCGTCCCCTTCGAGACCGTCCCCGTCGATCTCATGAAAGGAGAGCACAAGCAGCCTGCTTATCTCGCCTTACAGCCTTTCGGCACCGTTCCTGCTGTTGTCGACGGTGACTACAAGATCTTCGAGTCACGTGCCGTGATGAGGTACGTAGCTGAGAAGTACAGGTCCCAAGGACCTGACCTTTTGGGCAAAACCGTTGAAGACAGAGGTCAAGTTGAGCAATGGCTCGATGTTGAGGCCACCACTTTCCACCCACCTCTCCTTAACCTCACACTCCACATAATGTTCGCATCTGTCATGGGATTCCCATCTGATGAGAAGCTGATCAAG…	MVLKVYGPHFASPKRALVTLIEKGVPFETVPVDLMKGEHKQPAYLALQPFGTVPAVVDGDYKIFESRAVMRYVAEKYRSQGPDLLGKTVEDRGQVEQWLDVEATTFHPPLLNLTLHIMFASVMGFPSDEKLIKESEEKLAAVLDVYEAHLSKSKYLAGDFVSLADLAHLPFTDYLVGPIGKAYMIKDRKHVSAWWDDISSRPAWKETLEKYSFPA-
	BniB01g014490	ATGGCGTTAGAATCTCATTCTCAGATTTTAGTGGAAGAGAAACCTAGTGTTAGAATCTTGACGCTAAACAGACCAAAACAGCTGAATGCTCTGTCTTTGAACATGGTATTGACTATTGAATTTTTCCCCTTCCTGTTTCTTTCTCCGTATCGTACATATTTGGCTTAAAGTTATCTTCTATAGGTCACTCGGTTGCTGCAACTGTTCCTTGCATATGAGGAGGACCCTAGTGTCAAACTTGTCATCCTAAAGGTAATTTCATTATCCTTATCCATTTCCTGTTTGGAATATGAGTGTCAAACAAGTGTATAATAACTTTGGCACAGGGACAGGGAAGAGCATTTTGTGCCGGTGGTGATGTTTCAGCTGTTGTTCGTGATATTGGACTAGGCAACTGGA…	ATGGCGTTAGAATCTCATTCTCAGATTTTAGTGGAAGAGAAACCTAGTGTTAGAATCTTGACGCTAAACAGACCAAAACAGCTGAATGCTCTGTCTTTGAACATGGTCACTCGGTTGCTGCAACTGTTCCTTGCATATGAGGAGGACCCTAGTGTCAAACTTGTCATCCTAAAGGGACAGGGAAGAGCATTTTGTGCCGGTGGTGATGTTTCAGCTGTTGTTCGTGATATTGGACTAGGCAACTGGAGACGCAGTGCTGATTTCATGTCACTTGAATATACTCTCAACTATGTTATGGCCACATATTGTAAAGCTCAGATTTCAATTTTGAATGGTATTGTCATGGGAGGTGGAGCTGGTGTCTGCGTCCATGGTCGATTTCGTGTTGCTACAGAGAAC…	MALESHSQILVEEKPSVRILTLNRPKQLNALSLNMVTRLLQLFLAYEEDPSVKLVILKGQGRAFCAGGDVSAVVRDIGLGNWRRSADFMSLEYTLNYVMATYCKAQISILNGIVMGGGAGVCVHGRFRVATENTVFAMPETALGLFPDVGASYFLSRLPGFFGEYVGLTGARLNGAEMLACGLATHFVPSTVSTSFALQLDVIDRCFSRRTVEEIISALEKEATHKPDDWISATIGALKKASPASLKITLRSIREGRLQGVGQCLIRENRMVSHVMKGDISKDFVEWEPRRLEDMKDSMVEQYFKRVEEEDGWEDLKLPPRKHLPPSAIAKL
	BniB01g014580	ATGGCCTCTGAACCTCACTCTCAGGTCTTTTCTTTTTTACTGCCAAGCTGACAACGATCAGTTCTTCTTTCTCTCTGAATCAATTTGATTACAGGTTTTAGTGGAAGAGACATCGAGTGTAAGAATTTTGATACTAAACAGACCAAAGAAGCTGAATGCTTTGTCATTGAACATGGTATTGAATCTTTGCCCTTGTTGTTTCTTCCTCCATATCGTACATATTTTGCTTAAATTTATCTTCTATAGATCAACCGGCTGCTGCAACTGTTCCTTGCGTATGAGGAGGACCCTAGTGTCAAACTTATCATCCTAAAGGTAATTTCGCTATCCTAATCTCTTTCCGTTTATGCATATGAGGAGGACCCTTTGTGTCAAACAAGAGTATAACTTTGGCACAGG…	ATGGCCTCTGAACCTCACTCTCAGGTTTTAGTGGAAGAGACATCGAGTGTAAGAATTTTGATACTAAACAGACCAAAGAAGCTGAATGCTTTGTCATTGAACATGATCAACCGGCTGCTGCAACTGTTCCTTGCGTATGAGGAGGACCCTAGTGTCAAACTTATCATCCTAAAGGGTCAGGGAAGAGCGTTTTGTGCCGGTGATGATGTTTCTGCTGTTGTTCGTGACATAAAATTAGGCAAATGGAGACGCAGTGCTGATTTCATGTCACTTGGATATACTCTCAACTATGTAATGGCCACGTATAGTAAAGACCAGGTTTCAATTTTGAATGGTATTGTCATGGGAGGCGGAGCTGGGGTATGCGTCCATGGTCGATTCCGTATTGCAACTGAGAAC…	MASEPHSQVLVEETSSVRILILNRPKKLNALSLNMINRLLQLFLAYEEDPSVKLIILKGQGRAFCAGDDVSAVVRDIKLGKWRRSADFMSLGYTLNYVMATYSKDQVSILNGIVMGGGAGVCVHGRFRIATENTVFAMPQTSLGAFPDVGASYFLSRLPGFFGEYVGLTGARLDGAEMLACGLATHFVPSTRLSALEADLCRVGSSDPVTFASTILDAHTQYPHPKHRSACHRLDVIDKCFSRRTVEEIISALESEATHKPDDWTSATIEALKKASPASLKISLRSIREGRLQGVGQCLIRENRTVSHVMKGDISKDFVEGCRAILIDKDRNPKWEPRRLEEMKDSMVEQYFKRVEDEEGWEDLKLPPRKDLPASAIANL-
	BniB01g021760	ATGGAAAAACAATTAGCACAATTACAACACTTTTTCTTCGTATTCTTCTTTTATATCCTTACAATGGATACTATAGCATCAAACTCTTCGGATCTCACGACCAAAACTAGTCCCCAAACATCTCCGTTTAGCAACATGTATTTCCTCACAACACTTCAAGCTCTTGCAGTCATTTGTCTCTTAATGATATTCAAGAAAATAAAGTCATCTTCACATAACAAGAAGCTGCACCCTCTCCCACCGGGTCCAAGCGGGTTTCCGATCGTAGGAATGGTTCCAAAGATGCTTAAAAACCGTCCGGTTTTCCGGTGGCTTCATAGCCTCATGAAAGAGCTTAACACGGAGATAGCTTGTGTGCGTCTAGGAAACACTCACGTCATTCCAGTCACATGTCCTAAG…	ATGGAAAAACAATTAGCACAATTACAACACTTTTTCTTCGTATTCTTCTTTTATATCCTTACAATGGATACTATAGCATCAAACTCTTCGGATCTCACGACCAAAACTAGTCCCCAAACATCTCCGTTTAGCAACATGTATTTCCTCACAACACTTCAAGCTCTTGCAGTCATTTGTCTCTTAATGATATTCAAGAAAATAAAGTCATCTTCACATAACAAGAAGCTGCACCCTCTCCCACCGGGTCCAAGCGGGTTTCCGATCGTAGGAATGGTTCCAAAGATGCTTAAAAACCGTCCGGTTTTCCGGTGGCTTCATAGCCTCATGAAAGAGCTTAACACGGAGATAGCTTGTGTGCGTCTAGGAAACACTCACGTCATTCCAGTCACATGTCCTAAG…	MEKQLAQLQHFFFVFFFYILTMDTIASNSSDLTTKTSPQTSPFSNMYFLTTLQALAVICLLMIFKKIKSSSHNKKLHPLPPGPSGFPIVGMVPKMLKNRPVFRWLHSLMKELNTEIACVRLGNTHVIPVTCPKIAREIFKQQDALFASRPLTYAQKILSNGYKTCVITPFGEQFKKMRKVIMTEIVCPARHRWLHDNRAEETDHLTAWLYNMVKNSEPVDLRFVTRHYCGNAIKRLMFGTRTFSEKTKTDGGPTMEDIEHMDAMFEGLGFTFAFCVSDYLPMLTGLDLNGHEKIMREASATMDKYHDPIIDERIKMWREGKRTQIEDFLDIFISIKDADGQPLLTADEIKPTIKELVMAAPDNPSNAVEWAMAEMINKPEILQKAMEEIERVVGKERLV…
	BniB01g021790	ATGGCGGAAGCAAGACGTTTTAGCCCTAATAACGAATTAGGTGAACTGTTCAGAGTTTTTTTTTTCGTTAAATATTTTTTTCTGGGTCAAATATTATATATTTAATTAAATCTTTAATATTTTTCGATCTATTTGTTGTAGAACTCTTTATATGAAACTTGTAGATTCCTATCAAAGTTTCAATTTTTGTTCATCTATTCAAAAGGGGTTTATTTTATTTTAATCCATGATGAGTATTGATTGGTCTGAGTGATGGTTTCTTCTTGAAAGCATATTTTATCCGAATATTCATATTGCAAAGTTTTCTTTTTTTGCTTACTTTGGTCTGCTTGTAATACTTGTTTAAGTTGAAAACAAATCTAATCTAATTCTCGGTTTAGTCTTAATCATCATTTAAGT…	ATGGCGGAAGCAAGACGTTTTAGCCCTAATAACGAATTAGATGTTGGCCAGATACTCTCAGAAGCACGTAACCGATGGCTTCGTCCTCCTAAAATCTGTGAAATCTTACAGAATTACCAAAAATTTCAAATTTCTACCGAGCCACCTACTACACCGGCCAGTGGGTCTGTTTTTCTGTTTGATCGAAAGGTTCTCAGATACTTCAGGAAAGACGGTCACAATTGGAGGAAGAAAAGAGATGGAAAGACAGTGAAAGAAGCTCATGAGAGGTTGAAGGCTGGAAGCGTTGATGTTCTACATTGTTACTATGCGCATGGACAAGACAATGAAAATTTTCAAAGACGCAGTTACTGGATGCTTCAGGAAGAGCTTTCCCACATAGTTTTTGTCCATTATCTC…	MAEARRFSPNNELDVGQILSEARNRWLRPPKICEILQNYQKFQISTEPPTTPASGSVFLFDRKVLRYFRKDGHNWRKKRDGKTVKEAHERLKAGSVDVLHCYYAHGQDNENFQRRSYWMLQEELSHIVFVHYLEVKGSRVSTSYNRIQRTEDSGRSSQETGEVYTSERNGYASGSINQYDHSNQSQATDSASVNGVHTPELEDAESAYNQHGSSIFYSHQALQQPPATSFDPYYPMSLTPRDSYQKELRTIPSSTMVEKSRTINGPVVTNGLRNKKSIDSQTWEEILGNCGSGGEGLPMQPHSEHEVLDQMLQSCSFTMQDFASLQESMVKSQNPELSSGLTSDRSVWFQGQALDIEPNALSNLASSEKAPYLSTMKQHLLDGALGEEGLKKMDSFNRW…
	BniB01g038210	ATGGTGGTTCCCGGACGGAGAACCGTCTGGGACGGAGTAATCGAGCTGACGAAGACAGCTCAGGAACAGTGCGTCGATGCTCGTCTCTGGGCTTCTCATTTATCAGCGACCTTAAAACCCTTCGTTGAGTTCCCGTCAACGGAGCTAGCGGAGGTTCTCGTCTCGTACATTTGCTGGGATAACAACCTCCCTCTTCTCTGGAAGTTCCTTGAAAGAGCTATGTCTTTGAACCTTGTCTCTCCTCTCGTCGTTCTTGCTCTGCTCGCTCACAGGTTTTCTCTTTTGAATCTTATATCTTATTTGATTGTTTTCCTACAAATCTAGGGGCCTATAGATGTTAAAGCTTTGATCTTTATTGTATACTTCGTGTTTGGCTTCTTGCAGAGTTGTTCCGAACCG…	ATGGTGGTTCCCGGACGGAGAACCGTCTGGGACGGAGTAATCGAGCTGACGAAGACAGCTCAGGAACAGTGCGTCGATGCTCGTCTCTGGGCTTCTCATTTATCAGCGACCTTAAAACCCTTCGTTGAGTTCCCGTCAACGGAGCTAGCGGAGGTTCTCGTCTCGTACATTTGCTGGGATAACAACCTCCCTCTTCTCTGGAAGTTCCTTGAAAGAGCTATGTCTTTGAACCTTGTCTCTCCTCTCGTCGTTCTTGCTCTGCTCGCTCACAGAGTTGTTCCGAACCGGTCTACGCAATCGGCGGCTTATAGGCTTTACTTGGAGCTTCTCAAGAGAAATGTTTTCAGGATTAAAGATCATATTACCGGACCTCACTACGACAATGTCATGAATTCAGTA…	MVVPGRRTVWDGVIELTKTAQEQCVDARLWASHLSATLKPFVEFPSTELAEVLVSYICWDNNLPLLWKFLERAMSLNLVSPLVVLALLAHRVVPNRSTQSAAYRLYLELLKRNVFRIKDHITGPHYDNVMNSVANILRLPELFRLETSKPGVLLVEFVFEMVSLLLDACLSDEGLIELGQDSSSQWLIKSQDMETDAPERYNGMTGSHEKLKTLNTIMAIEMVAEFLRNTVISRLLYLVSSNRASNWHEFVRRVQVLGENSMALRSSKVLNSGDLLQLISNRRFGYSYDSKVVSLRKSNAIVDFGSLASFAGLCHGASLSSLWLPLDLVFEDAMDGYQVNPTSAIEIITGLAKTLKEINGSTWHDTFLGLWIAALRLVQRERDPIEGPIPRLDTRLCMS…
	BniB01g039550	ATGGCTTCCATGTCCGCCGTCCTCAGCAAATCCCCTTTCCTCTCTCAGCCTCTCTCCAAAACTCCACCCTCCGATCTCCCCTTCTCCGCTTCCGTTTCCGTCTCTTTCCCCTCGAAATCGCGCCGTCGCGGAGGAGTGATCCGCGCCGGACTCATCTCACCCGACGGAGGGAAGCTCGTGGAGCTAGTGGTGGCCGAGCCACGACGGCGGGAGAAGAAGCACGAGGCGGCGGAGCTGCCTCGCGTGGAGCTCACGCCGATCGACCTGCAATGGATGCACGTGCTGAGCGAAGGCTGGGCAAGTCCGCTCGGAGGTTTCATGAGAGAATCCGAGTTCCTCCAAACTCTTCATTTCAACTCGCTACGTCTTGACGACGGATCCGTCGTCAACATGTCGGTG…	ATGGCTTCCATGTCCGCCGTCCTCAGCAAATCCCCTTTCCTCTCTCAGCCTCTCTCCAAAACTCCACCCTCCGATCTCCCCTTCTCCGCTTCCGTTTCCGTCTCTTTCCCCTCGAAATCGCGCCGTCGCGGAGGAGTGATCCGCGCCGGACTCATCTCACCCGACGGAGGGAAGCTCGTGGAGCTAGTGGTGGCCGAGCCACGACGGCGGGAGAAGAAGCACGAGGCGGCGGAGCTGCCTCGCGTGGAGCTCACGCCGATCGACCTGCAATGGATGCACGTGCTGAGCGAAGGCTGGGCAAGTCCGCTCGGAGGTTTCATGAGAGAATCCGAGTTCCTCCAAACTCTTCATTTCAACTCGCTACGTCTTGACGACGGATCCGTCGTCAACATGTCGGTG…	MASMSAVLSKSPFLSQPLSKTPPSDLPFSASVSVSFPSKSRRRGGVIRAGLISPDGGKLVELVVAEPRRREKKHEAAELPRVELTPIDLQWMHVLSEGWASPLGGFMRESEFLQTLHFNSLRLDDGSVVNMSVPIVLAIDDEQKAGIGESRRVALVDSDGNPVAILSDIEIYKHPKEERIARTWGTTAPGLPYVEEAITNAGNWLIGGDLEVLEPVKYNDGLDRFRLSPAELRKELEKRGADAVFAFQLRNPVHNGHALLMTDTRRRLLEMGYKNPILLLHPLGGFTKADDVPLSWRMKQHEKVLEDGVLDPETTVVSIFPSPMHYAGPTEVQWHAKARINAGANFYIVGRDPAGMGHPVEKRDLYDADHGKKVLSMAPGLERLNILPFRVAAYDKTQG…
	BniB01g044210	ATGGCTCCTTCTGCGCAGTCTCTTCCTATAAGGTATAATATATCGTTCTTTTAAAAAAAACCGTTATGTATTAACGATATACATAATCATAATAGTCTCGCATTTACTATGTTAATCTGATCATATGATATATGATTGATGAACAGTGTTTCTGATGAGAAATACGCGAATGTGAAGTGGGAAGAATTGGGATTCGGGTTTTATCGTACGGACAGTATGTATGTTGCGAAGTGCAAACATGGAGAGAGTTTCCAAGAGGGAAAGATCGTTCCTTATGCTGATTTCCAAATCAGCCCTTGCTCGGCAGTTCTTAACTATGGCCAGGTTTGTTACTAATCCATGGAGAGATTAACTAATTAATAAACATTATATAATCAGAACATAATTCATCATCACATA…	ATGGCTCCTTCTGCGCAGTCTCTTCCTATAAGTGTTTCTGATGAGAAATACGCGAATGTGAAGTGGGAAGAATTGGGATTCGGGTTTTATCGTACGGACAGTATGTATGTTGCGAAGTGCAAACATGGAGAGAGTTTCCAAGAGGGAAAGATCGTTCCTTATGCTGATTTCCAAATCAGCCCTTGCTCGGCAGTTCTTAACTATGGCCAGGGTTTATATGAAGGACTGAAGGCTTACAGGACCGAAGATGGCCGGATTATGCTATTCCGACCAGACCAGAACGCTCTCCGCCTTCAATCCGGAGCCGACAGACTTTGTATGTCTTATCCCTCCGTCGATCAATTCGTCTCCGCCGTCAAACAAGTTGTTCTTGCCAACAAGAAATGGATTCCTCCTCCG…	MAPSAQSLPISVSDEKYANVKWEELGFGFYRTDSMYVAKCKHGESFQEGKIVPYADFQISPCSAVLNYGQGLYEGLKAYRTEDGRIMLFRPDQNALRLQSGADRLCMSYPSVDQFVSAVKQVVLANKKWIPPPGKGTLYIRPILFGSGPILGSFPVPEYTFTVFACPVGRYHKDKAGLNLKIEDKFRRAFPSGTGGVKSITNYSPVWITLAEAKAQGFSDVLFLDAATGKNVEELFASNVFIVKGNVVSTPEISGTILPGVTRKSIIELTRDFGYKVEERVVPVEDLLDAEEVFCSGTAAIVTTIASVTFKDKKTGFKTGDETLAAKLFATLTDIQMGRVEDKKGWTVEIDQCHKG-
	BniB01g057400	ATGATATTTCATTCTGATTCGCTGATCTCTATTCGCTTCTATGGACATGGACAGGTAAAAGAACAAACTTTGTGTGTTTTTTTTTTTTTTAAATTATGTTTCAAAACAAGAACAAACTCGATGTAGCTGCAACTTCACTTCTTGTCTCATTATTCCGTTTTTTTTTATTACAAACCATGTCTAGTTTGGTTGACATTGGTCGGATAATATATAGATTAACCTTCGTGTCATTTTCTTCTTGTTTTGCCTTTCTTTGGGTTTGATGCAGTGCAGATACAACAGTGGTAACAACAACATGGTTGTCAAAGCTTACCCTTTACGTACTATGACTAGCAACGGCATTGGTCAAGAAGAAGAAGAAGGAGACTCTGTAACATTTGAACCGTACGTTGGACTAGA…	ATGATATTTCATTCTGATTCGCTGATCTCTATTCGCTTCTATGGACATGGACAGTGCAGATACAACAGTGGTAACAACAACATGGTTGTCAAAGCTTACCCTTTACGTACTATGACTAGCAACGGCATTGGTCAAGAAGAAGAAGAAGGAGACTCTGTAACATTTGAACCGTACGTTGGACTAGAGTTTGACACTGCAGAGGAAGCTCGCGAATACTACAATTCCTTCGAGGACAGAAAGAGCATAACCACGAGCTTGGTGGTCTTATCGAGGAGCCTACCACTACTAGTACTACTCCACGTTCTTCAGCACCTGCTCCTACTAAGCTTCCTAGCTACATCGGTTCCACATAGACCAAAGATGAAGGTTGTTGATGAAGGTGATAAAGGTGTGATCTCT…	MIFHSDSLISIRFYGHGQCRYNSGNNNMVVKAYPLRTMTSNGIGQEEEEGDSVTFEPYVGLEFDTAEEAREYYNSFEDRKSITTSLVVLSRSLPLLVLLHVLQHLLLLSFLATSVPHRPKMKVVDEGDKGVISFKRFKGAEETQAAEPYAGLEFSSANDACQFYQTYAEAVGFRVRIGQLFRSKVDGSITSRRFVCSKEGFQHPFRMGCGAYMRIKKRDSGGWIVDRLSKDHNHDLEPARENTILKEWYPVLLDHFESKQAEDTGFFYAVELDSSNGSCMSIFWADSKSRFACSQLGDAVVFDTSYRERDCSVVPFAMFIGFNQHRQPVLLGAALVADESKESLCWLFKTWLRAMSGRRPRTIVADQDLFIQQAVAQVFPGTRHRFSAWQIRCKERENL…
	BniB01g061730	ATGGTGGTCAAACTATTTGGGCAGATAAAAGCAGCTAATCCACAAAGAGTATTGCTCTGTTTTCTTGAAAAAGGCATCGAGTTTGAAGTTATCCATGTCGATCTTGATACATTTGAGCAGAAAAAACCAGAGTATCTTCTTCGTCAGGTAATAAATTATTTTAGTTATTATCAGAGAAAACAAATTGATTATATAAGCCTATGTGCGTAGTTCCGATGTTGTATTATAAAACTTGTATACTTGTGTTAGCCCTTTGGTCAAGTTCCAGCTATTGAAGATGGAGATCTGAAGCTTTTTGGTAAAATAACTACTCCAAACTTTTAATCAAAACTTAATTAATGCAGATATATTAATTTCTTGGCTAAGTCAGAATTTATCTTGAAAAATAAATACTATAAA…	ATGGTGGTCAAACTATTTGGGCAGATAAAAGCAGCTAATCCACAAAGAGTATTGCTCTGTTTTCTTGAAAAAGGCATCGAGTTTGAAGTTATCCATGTCGATCTTGATACATTTGAGCAGAAAAAACCAGAGTATCTTCTTCGTCAGCCCTTTGGTCAAGTTCCAGCTATTGAAGATGGAGATCTGAAGCTTTTTGAATCTCGGGCCATATCGAGGTACTACGCGACTAAGTATGCGGACCAAGGAACGGACCTACTGGGCAAGACCTTGGAGCAACGAGCCATCGTGGAACAGTGGATGGAAGTGGAGGCTAACTACTTCAACGTTGTGGTTCTACCTTTAGTTATAAACATCGTATTTACGCCCAATTTCGACGTTGCTTTGGTGGAAGAGCTAAAG…	MVVKLFGQIKAANPQRVLLCFLEKGIEFEVIHVDLDTFEQKKPEYLLRQPFGQVPAIEDGDLKLFESRAISRYYATKYADQGTDLLGKTLEQRAIVEQWMEVEANYFNVVVLPLVINIVFTPNFDVALVEELKVKFDKVLDVYEKQLATNRYLAGAEFTLADLTHMPGMRYIINEAGLGGMVTSRENVNRWWNEISARSAWKKLMEMAAY-
	BniB02g003700	ATGGTTTTCTCATCCAATTGGTCACAGGTTTCACCTCCTTGATCTTCCATTACTAAATGTTCTCTCTGTCTCCCTTTCTTTTGTAACTACAATGTTTTGATTCGTTTAATTAGTAATATTTTTGATTCATTTCCAAAAGATATTCCTATTCTCATGCATCTGCTTTTTTTTCTCTCTTTAAAATCCCAACATCTACATATATATATATATGACATTTCCTTTTTATTAAACACAAACCACATCAGTCTGGATTATTTGATTTCTTGGTTCTTTATATTAATTCTGATTTTTGTCAAATTCTTTCAGGCTACAAATTCGAATCAGCTTCAGCTTAACGAAAATGGAAGTTTAGTGAATGGCCACGGACTACTTTCTCACCAACTTCCACCTTTCCAACCA…	ATGGTTTTCTCATCCAATTGGTCACAGGCTACAAATTCGAATCAGCTTCAGCTTAACGAAAATGGAAGTTTAGTGAATGGCCACGGACTACTTTCTCACCAACTTCCACCTTTCCAACCAAACCCTAACCCTAACCACCACCATGCCGCTGCCTCCAGTGCTCTTCCGGCGAGGCTTGGTGGATCTATGGCGGAGGGAGCGAGCCAGGCCAGAGCTCCTCGGCCTGAGGGAGCCCTAAACTGTCCTCGATGCAACTCAATCAACACTAAGTTCTGTTACTACAACAACCAGAGCCGTACTCAGCCTCGCCACTTTTGCAAGGCTTGCCGCCGCCACTGGACACGTGGTGGCAAATTGAGGGACGTCCCCGAAGGTGGACGCCGCCGGAGAAATAGCAAA…	MVFSSNWSQATNSNQLQLNENGSLVNGHGLLSHQLPPFQPNPNPNHHHAAASSALPARLGGSMAEGASQARAPRPEGALNCPRCNSINTKFCYYNNQSRTQPRHFCKACRRHWTRGGKLRDVPEGGRRRRNSKKNKNGNSKSSSTVNAPSSSSGQLTTNHQFPFLPTLQHLNQLGGIGLNLAATNGNNQAHLIGSSLMNDLGFLHVGNERNNNNNNNNNLMGSGGFALFDPTHGFQNVGNIGNDVGLSFSSTSMVDSIIYQTVPVKMEEQPNLVNLSRPVSGLTPLVNQTNQYFWNNSDFSGPSSNNDHHQLL-
	BniB02g006840	ATGGCACCTTCTTGCAGCCCAGTTAACTCACTCCACGTGGCAGTGATCGGAGCAGGAGCCGCCGGCCTCGTAGCTGCACGTGAGCTACGCCGCGAGTCGCACTCCGTCGTCGTTTTCGATCGCGGCACAGAAGTCGGAGGTCTCTGGGTCTACACACCTCAAAGCGAACCGGACCCGCTTAGTCTCGATCCGGACAGAACCGTGGTCCACTCGAGCGTCTACGACTCGCTACGGACCAATCTCCCGAGAGAGTGTATGGGTTACAGCGACTTCCCTTTCGTGCCACGACCCGAACACGACGAGTCTAGAGACCCGAGAAGGTATCCTAACCACAGGGAAGTCTTGGCGTATCTTCGAGACTTTGCGAGAGAGTTCAAACTCGTGGAGATGGTTCGGTTC…	ATGGCACCTTCTTGCAGCCCAGTTAACTCACTCCACGTGGCAGTGATCGGAGCAGGAGCCGCCGGCCTCGTAGCTGCACGTGAGCTACGCCGCGAGTCGCACTCCGTCGTCGTTTTCGATCGCGGCACAGAAGTCGGAGGTCTCTGGGTCTACACACCTCAAAGCGAACCGGACCCGCTTAGTCTCGATCCGGACAGAACCGTGGTCCACTCGAGCGTCTACGACTCGCTACGGACCAATCTCCCGAGAGAGTGTATGGGTTACAGCGACTTCCCTTTCGTGCCACGACCCGAACACGACGAGTCTAGAGACCCGAGAAGGTATCCTAACCACAGGGAAGTCTTGGCGTATCTTCGAGACTTTGCGAGAGAGTTCAAACTCGTGGAGATGGTTCGGTTC…	MAPSCSPVNSLHVAVIGAGAAGLVAARELRRESHSVVVFDRGTEVGGLWVYTPQSEPDPLSLDPDRTVVHSSVYDSLRTNLPRECMGYSDFPFVPRPEHDESRDPRRYPNHREVLAYLRDFAREFKLVEMVRFGTEVVLVEQEGRKWKIRSRNSDGVSRDEIFDSVVVCNGHYTEPRVAQVPGIDVWPGKQLHSHNYRVPDPFKDQVVVVIGNFASGSDISRDLTGVAKEVHIAARSKPSETYEKLPGANNLWLHPMIETARKDGSIVFKNGKVVQADAIVHCTGYIYHFPFLNTNGYITVEDNCVGPLYKHVFPPALAPGLSFVGLPWMTLLFTMFELQSKWVAAVLSGRVTLPSQEKMMEDTNALYAKRDANGFPKRYTHRLGVVAQVDYLKWIADQ…
	BniB02g011750	ATGATCGGAGCTAAATCGTTTCTAGGCCTTTCAATCGCATCCCCAAAAGGGATATCCGACAGCAATTATTCATTGAGTACAAACTCGAGATCTGTTGGTGTTCTTCGTGCTTGTGTTTCCATGGAAGGATCTCAAACCATGAGTCATAGCAAAAATGGATCTATCTCTGAGCTGAAATCCGTTAATAATGGTCACACAGGTATATAAAAATTTAGATTTTATTTGATCCCCATGAGAAGAAAAATGACAAGAATTTTCATTTTGATTAGGACAAAAACAAGGACCATTGTCTACGGTCGGAAACTCGACGAACATAAAGTGGCATGAATGTCCTGTTGAGAAAGTTGATAGACAGAGGTTGCTTGACCAGAAAGGATGTGTGATTTGGGTCACTGGTCT…	ATGATCGGAGCTAAATCGTTTCTAGGCCTTTCAATCGCATCCCCAAAAGGGATATCCGACAGCAATTATTCATTGAGTACAAACTCGAGATCTGTTGGTGTTCTTCGTGCTTGTGTTTCCATGGAAGGATCTCAAACCATGAGTCATAGCAAAAATGGATCTATCTCTGAGCTGAAATCCGTTAATAATGGTCACACAGGACAAAAACAAGGACCATTGTCTACGGTCGGAAACTCGACGAACATAAAGTGGCATGAATGTCCTGTTGAGAAAGTTGATAGACAGAGGTTGCTTGACCAGAAAGGATGTGTGATTTGGGTCACTGGTCTCAGTGGTTCAGGGAAGAGCACTTTAGCTTGTGCTTTGAATCAGAAGCTGTACCAAAAGGGGAAGCTTTGT…	MIGAKSFLGLSIASPKGISDSNYSLSTNSRSVGVLRACVSMEGSQTMSHSKNGSISELKSVNNGHTGQKQGPLSTVGNSTNIKWHECPVEKVDRQRLLDQKGCVIWVTGLSGSGKSTLACALNQKLYQKGKLCYILDGDNVRHGLNRDLSFKAEDRAENIRRVGEVAKLFADAGIICIASLISPYRRDRDACRTLLPEGDFVEVFMNVSLEVCEARDPKGLYKLARAGKIKGFTGIDDPYEPPLNCEISLGQEGTGTSPIEMADTVVAYLERKGYLKA-
	BniB02g015530	ATGAGCAACGAAGAATCACACGCCAACCTTGTGGTTCCTGCGTTTAGAACTGAGAAAGTGGCCAAAACGCAAACTCAGAATGGCCACGGTACCGTTTGGCGGTTCAGTGGAACCAATAAGGCCGCGAAAGCCTCGACCGTATCGATGAGAGGAGTTATCTACATGCTGTTCGACAATTGCAGCAGGGACGTCAAAAAGACAGTTTTGCCCCTCGCTCATGGGGATCCTTCCGTCTACCCCTGCTTCCGCACCTGTATTGAGGCCGAAGATGCCGTCGTCAACGTCCTCCGCTCAGGCAAAGGCAACTCTTATGGTCCTGGAGCTGGGATTCTCCCTGCCAGAAGGTAAATAAATCCGATCAACTCAAGTCTCCATACTTTGCTCACTCGAAAGAACACA…	ATGAGCAACGAAGAATCACACGCCAACCTTGTGGTTCCTGCGTTTAGAACTGAGAAAGTGGCCAAAACGCAAACTCAGAATGGCCACGGTACCGTTTGGCGGTTCAGTGGAACCAATAAGGCCGCGAAAGCCTCGACCGTATCGATGAGAGGAGTTATCTACATGCTGTTCGACAATTGCAGCAGGGACGTCAAAAAGACAGTTTTGCCCCTCGCTCATGGGGATCCTTCCGTCTACCCCTGCTTCCGCACCTGTATTGAGGCCGAAGATGCCGTCGTCAACGTCCTCCGCTCAGGCAAAGGCAACTCTTATGGTCCTGGAGCTGGGATTCTCCCTGCCAGAAGAGCCGTAGCCGAATATCTGAATGGCGATCTTCCAAACAAGTTAACGGCCGACGAC…	MSNEESHANLVVPAFRTEKVAKTQTQNGHGTVWRFSGTNKAAKASTVSMRGVIYMLFDNCSRDVKKTVLPLAHGDPSVYPCFRTCIEAEDAVVNVLRSGKGNSYGPGAGILPARRAVAEYLNGDLPNKLTADDIFLTAGCNQGVEIVFESLARPNANILLPRPVFPHYDARAAYSGLEVRKFDLLPNKQWEIDLQGVEAISDENTVAIVVINPNNPCGNVYSHHHLQKVAETARKLGIMVITDEVYDQTIFGDNPFVPMAKFASIVPVLTLGGISKGWVVPGWKIGWIALNDPEGVFESTNVAQSIKQNLDITPDPSTIIQAALPEILEKADKSFFAKKNKILKHNVDLVCDWLKDIPCVICPKKPDSCTYLLTKLELSLLEDIKDDTDFCVKLAREEN…
	BniB02g018410	ATGCAAACTTCTCAAAACCTCACTACGATGAGGCTATCTTCAGGCAGACGAGGTAGATATTGTCGAAGAAGCAATCTGCTTTAAGTAGGCTTTCTGTACTCTCATTGTCTATGTACATTTGCATAAGCTGAAATATTCTTGGTTATTTCAATATATTTTAGCCACTACAAAAGAAATGGTCTTCGCAGCTCTTTATCCATACGTGTCACTGAAGGTTTAAGCAGCTATCTTGAGTTGGTTTTTACTTTAGTTAGCTGCTTCTTGATGTGAAGTTGACTTTATAGTCATACACTAAGATCTGCAGCTACCAACTGAATGTACCATTAGAATGGCTTAAAGCTTTTTCTTAATGAATATGCTTTGTTTTGAGATGTATACTCATTTTGTGACTTTTGTCCA…	ATGCAAACTTCTCAAAACCTCACTACGATGAGGCTATCTTCAGGCAGACGAGATGTTGGCCAAATACTCTCAGAAGCTCGAAACCGATGGCTTCGTCCTCCTGAAATCTGTGAGTTTTTGCAGAATTACCAAAGATTTCAAATCTCTACGGAGCCACTTACTACACCTGCAAGTGGATCTGTTTTTCTATTTGATCGAAAGGTGCTCAGATACTTCAGGAAAGATGGTCACAATTGGAGGAAGCAAAGAGATGGAAAGACAGTGAAAGAAGCTCATGAGAGGTTGAAGGCGGGAAGCATTGATATTCTACATTGTTACTATGCCCATGGACAAGACAATGAAAATTTTCAAAGACGTAGTTATTGGATGCTTCAGGAAGAGCTTTCCCACATAGTTTTT…	MQTSQNLTTMRLSSGRRDVGQILSEARNRWLRPPEICEFLQNYQRFQISTEPLTTPASGSVFLFDRKVLRYFRKDGHNWRKQRDGKTVKEAHERLKAGSIDILHCYYAHGQDNENFQRRSYWMLQEELSHIVFVHYFEVKGSRVSTSYNRMQRTADSAHETGEAFTSERDRYASVSINQYDHSNHSQAADSASINGVHTPELEDAESAYNQQGSSIVYSHQQPASTDFDPYYQMSLTPRDSSQKKLRRVPIITDSSIMVVDKSRTINGPGVTNGLRNKKSIDSQTWEEILGNCGSGAEGLPNSEHEVLDQILECSSFTMQDFASLQKSMLKSQVSTADTELNAISSLASSEKLHIYLR-
	BniB02g033500	ATGGCAGCCTCAAGCACCGTCGCTTCTCTCAGAACCTCCGTTTCTTCAGCTCCTTCGCCATCCCCTTCCTCTTCCCGATTAACCCATTTGAGATCCCCCTCCAAAACTCTCAAATTTACGCCTCTGCCATCCTCTCGCTCAAGGCCATCCTTCTCCGTCTCCTGCACTATCGCCAAGGACCCGCCTGTTCTCATGTCCGCCGGATCCGACACGACCCTCTGGCAGCGACCCGATTCGTTCGGTCGGTTCGGGAAGTTTGGTGGCAAGTATGTCCCCGAGACGCTGATGCACGCTCTCTCTGAGCTCGAATCTGCTTTTCATTCTCTCGCCACCGACGATGATTTCCAGGTACCTTGTTCTTCGTGATTCGAATAGAAATTAAACATTTTGACGTTGTGG…	ATGGCAGCCTCAAGCACCGTCGCTTCTCTCAGAACCTCCGTTTCTTCAGCTCCTTCGCCATCCCCTTCCTCTTCCCGATTAACCCATTTGAGATCCCCCTCCAAAACTCTCAAATTTACGCCTCTGCCATCCTCTCGCTCAAGGCCATCCTTCTCCGTCTCCTGCACTATCGCCAAGGACCCGCCTGTTCTCATGTCCGCCGGATCCGACACGACCCTCTGGCAGCGACCCGATTCGTTCGGTCGGTTCGGGAAGTTTGGTGGCAAGTATGTCCCCGAGACGCTGATGCACGCTCTCTCTGAGCTCGAATCTGCTTTTCATTCTCTCGCCACCGACGATGATTTCCAGAGAGAGTTGGCGGGGATCTTGAAAGACTACGTGGGTCGAGAAAGCCCTCTG…	MAASSTVASLRTSVSSAPSPSPSSSRLTHLRSPSKTLKFTPLPSSRSRPSFSVSCTIAKDPPVLMSAGSDTTLWQRPDSFGRFGKFGGKYVPETLMHALSELESAFHSLATDDDFQRELAGILKDYVGRESPLYFAERLTEHYRRENGEGPLIYLKREDLNHTGAHKINNAVAQALLAKRLGKKRIIAETGAGQHGVATATVCARFGLECIIYMGAQDMERQALNVFRMRLLGAEVRAVHSGTATLKDATSEAIRDWVTNVETTHYILGSVAGPHPYPMMVRDFHAVIGKETRRQAMEKWGGKPDVLVACVGGGSNAMGLFHEFVDDTEVRLIGVEAAGFGVDSGKHAATLTKGDVGVLHGAMSYLLQDDDGQIIEPHSISAGLDYPGVGPEHSFLKDM…
	BniB02g035710	ATGGCAACGGAAACAGTAATCGAACGTGACGAGACCGAGTCAACAGATCAGTTCGAGAAGAATCGGAAACGGTACAAAGACCTAATCTCCACGTTCCCTCGTGCAAAAGGCTGGATGCCGAGAGAACCCCTGTTTGGGTACCGTGGTTATTGGTGTACACAGCATTTCCTTGAAGGTGTCTTTTACGCGCAAGAGTTCTTCCAAGCACGACCCAGTGACTTACTCATCTGTAGCTACCCGAAGACAGGTACCACTTGGCTCAAAGCACTAGCATTCGCAATCACCAATCGATCACGCTTCGACAATCTCACGAACCCACTCCTAAAACGTAACCCTCACGAGCTTGTTCCTTTCATTGAGTATGAGTTCTCTTTCTTCCCTCAAGTTGATGTTCTCAAA…	ATGGCAACGGAAACAGTAATCGAACGTGACGAGACCGAGTCAACAGATCAGTTCGAGAAGAATCGGAAACGGTACAAAGACCTAATCTCCACGTTCCCTCGTGCAAAAGGCTGGATGCCGAGAGAACCCCTGTTTGGGTACCGTGGTTATTGGTGTACACAGCATTTCCTTGAAGGTGTCTTTTACGCGCAAGAGTTCTTCCAAGCACGACCCAGTGACTTACTCATCTGTAGCTACCCGAAGACAGGTACCACTTGGCTCAAAGCACTAGCATTCGCAATCACCAATCGATCACGCTTCGACAATCTCACGAACCCACTCCTAAAACGTAACCCTCACGAGCTTGTTCCTTTCATTGAGTATGAGTTCTCTTTCTTCCCTCAAGTTGATGTTCTCAAA…	MATETVIERDETESTDQFEKNRKRYKDLISTFPRAKGWMPREPLFGYRGYWCTQHFLEGVFYAQEFFQARPSDLLICSYPKTGTTWLKALAFAITNRSRFDNLTNPLLKRNPHELVPFIEYEFSFFPQVDVLKDKGNTLFSTHMPHDFLSDSVKSGCKMVYIWRDPKDTFVSVWHFLQKRRSDCGPLNSLEKCFDMFCQGFSANGPYLDHALGYWKAHQENPNQILFLNYETLSADPLPYVKRLAEFMGYGFTVEEEKNGVVEKVVNLCSFETMKNLEANKGDKEREDHPSPYTNSAFFRKGKTGDWINYLTPDMAARMDKLAEEKFKGTGLLENGK-
	BniB02g036600	ATGGATTACATTTTGGTCCTATTGCCACTCGTATTGTTTCTATTAGCTTACAAGTTCTTATTCTCATCTAAGCGTTTCAATCTCCCACCAGGACCAACTGCCTTTCCCATCGTCGGCAACCTCCACCTCGTGAAACCTCCGGTGCACCGTCTCTTCCGTCGTTTCTCTGAGAAGTACGGCGACATCTTCTCCCTACGTTACGGCTCTCGCCAAGTCGTTGTGATCTCTTCCTTGCCACTCGTCAGAGAATGCTTCACTGGTCAGAACGACGTTATTTTAACGAACCGGCCGCATTTTCTGACCGCCAAATACGTCGCTTACGACTACACCACGGTCGGGACCGCCGCTTATGGCGACCATTGGCGTAACCTCCGCCGTATTTGCTCTCTGGAGATCCTT…	ATGGATTACATTTTGGTCCTATTGCCACTCGTATTGTTTCTATTAGCTTACAAGTTCTTATTCTCATCTAAGCGTTTCAATCTCCCACCAGGACCAACTGCCTTTCCCATCGTCGGCAACCTCCACCTCGTGAAACCTCCGGTGCACCGTCTCTTCCGTCGTTTCTCTGAGAAGTACGGCGACATCTTCTCCCTACGTTACGGCTCTCGCCAAGTCGTTGTGATCTCTTCCTTGCCACTCGTCAGAGAATGCTTCACTGGTCAGAACGACGTTATTTTAACGAACCGGCCGCATTTTCTGACCGCCAAATACGTCGCTTACGACTACACCACGGTCGGGACCGCCGCTTATGGCGACCATTGGCGTAACCTCCGCCGTATTTGCTCTCTGGAGATCCTT…	MDYILVLLPLVLFLLAYKFLFSSKRFNLPPGPTAFPIVGNLHLVKPPVHRLFRRFSEKYGDIFSLRYGSRQVVVISSLPLVRECFTGQNDVILTNRPHFLTAKYVAYDYTTVGTAAYGDHWRNLRRICSLEILSSNRLTGFRSVRKDETRRLLTKLSREHNGRVVELEPLLADLTFNNIVRMVTGRRYYGDQVHNKEEADLFKKLVTQINDNSGASHPGDYLPILKVFGHGYEKKVKALGEAMDNFLQRLLDDCRRDGESNTMLSHLLSLQVDQPKYYSDVIIKGLMLSMMLAGTDTAAVTLEWAMASLLKNPEVLKKAKAEIDDKIGHERLVDEPDIVNLPYLQNLVSETFRLCPAAPLLVPRSPSEDLKIGGYDVPRGTIVLVNSWAIHRDPRLWDE…
	BniB02g050820	ATGCAGGAGCAAACGACTAGCTCTTTACCTGCAAGCTCTCTACCATCAAGCAGCGAGAGATCATCGAGCTCTGCTCCTCATTTGGAGATCAAAGAAGGTAAAAAAAAATTTATCAATTGAAATTTTTGATTTTTTACATTCTCCCACGCTTGATCTTATCGATTTTCAGCCTCATGCATTTAATATTAAGTCAATTGTCATTGGTTTTATCAATTGGTTCAGCAGATCTTTAGAATCCGTAACTTCAATCTCGTTTTAAAAGTCTTTCCTTTTTGTTTTTTTTTCATCAGGAATTGAAAGCGATGAGGAGATACGGAGAGTTCCGGAGTTTGGAGGAGAAGCTACCGGAAAGGAAATCTCCGGACGGGAATCTGGATCGGGAACCGGTCAGGACCAGAC…	ATGCAGGAGCAAACGACTAGCTCTTTACCTGCAAGCTCTCTACCATCAAGCAGCGAGAGATCATCGAGCTCTGCTCCTCATTTGGAGATCAAAGAAGGAATTGAAAGCGATGAGGAGATACGGAGAGTTCCGGAGTTTGGAGGAGAAGCTACCGGAAAGGAAATCTCCGGACGGGAATCTGGATCGGGAACCGGTCAGGACCAGACACAGATAACGGTCGGAGGAGAGGGTCAAAGGAAGAGAGGGAGGACTCCGGCTGAGAAAGAGACCAAGCGGCTAAAGAGGTTGTTGAGGAACAGAGTTTCAGCACAGCAAGCAAGAGAGAGGAAAAAGGCTTACTTGGGTGAGCTGGAAAACAGAGTGAAAGACTTGGAGAACAGAAACTCTGAACTTGAAGAG…	MQEQTTSSLPASSLPSSSERSSSSAPHLEIKEGIESDEEIRRVPEFGGEATGKEISGRESGSGTGQDQTQITVGGEGQRKRGRTPAEKETKRLKRLLRNRVSAQQARERKKAYLGELENRVKDLENRNSELEERLSTLQNENQMLRQILKNTTGNKRGGGGSNADASL-
	BniB02g053290	ATGTGGAAAATTAGAGTTAAGGTTATCCAGCTTTGGAAGCAATACTCTGCTGCAGGTGGTCTGACTATTGAGATGGTTTTAGTCGATGCCAACGTGAGTGTAAACTTTTTTTAATACGTTTTGAGTAGTTATACTTTTAACATTTCGACATGTCTTCATTTGTAATATTTTTGTTTTTGTTTTTTTTTAAATGTCATGATCCATGCTACTGTCAAGAAAGTTTTGGTGAGTCAGTTTGATCCATTCCTTTCTGAAGGGATCTCAAATATTCTCATCAACTTTTCCTGTAATCATTTGTGTGGATCGTACCGGACAACAAGCCACCAATACAGGATTGCATTTCTTTCGACAACCCGTATAAAGATCAGCGTGGATCTACCGAGGGCATTGACGGGTTTA…	ATGTGGAAAATTAGAGTTAAGGTTATCCAGCTTTGGAAGCAATACTCTGCTGCAGGTGGTCTGACTATTGAGATGGTTTTAGTCGATGCCAACGGAAAGTTCGCATCAGATGTGAACGAGGCAATTCAAAACCGAGGAGAAGATTCAATCATTTGGGTGCTGAAATTTGGCAAAATCAAGGTTTGTAAGGGCATCGATCCCTTGACCCACAAGCCACTTGCTTCTAACCCTTATCCGGCCACGCCCACGACTTCTGAAGGCCAAGATGACTCAAACCCGAGTAACCTGGATGAGCAATCACAATCTGGTTCGATGTCTCCAAAGTCTCTTCCTATTTCATCAAGCTCCTGCAATCTACAGGTAAACAACAGTGATGAGACACCGAGAAACAATGGTTCC…	MWKIRVKVIQLWKQYSAAGGLTIEMVLVDANGKFASDVNEAIQNRGEDSIIWVLKFGKIKVCKGIDPLTHKPLASNPYPATPTTSEGQDDSNPSNLDEQSQSGSMSPKSLPISSSSCNLQVNNSDETPRNNGSLSSKKCCFKKSSSTSKLLNKVATKASSIGNMVSASMEGSLIRSTTLSPCPNDVFSETSQVQMDEFAPFSYSSDQHITDYMKEDISMDFDLNNSEYDFSQFLEQFSNTEAEDIGGYNHDLLLSDVSSTSVDEDNMMQNITGWSNFLVDDSDFPYDTNLDFYDKNLV
	BniB02g054940	ATGTTTTCCTCCATGAATGTGGCGACGATGCAACCATTGAGTTTCTCTCGCCGGCTCGCTCCCTCTGCTGCTTCTCGAGCACTCTCTTTTTCTTCTTCTTCTTCTTCTTCTTCTTCTTCTTCTGTGACCGTTACTGGATATTCCCGTAGAAGCTCGGCTTACGCGCCCTCTCTCCGTTCGATCAAATGCGTCTCTGCACCACCGGAAGCTTCAATAGGTGAGGCAATGCTCTTAACGGTTTATACTCTTCAGTTACATTTTGATATAGGTTTGATTGTGAATTGGAATCTTCTCGATCGGAATCGGAATCGGAATCTGATACATGTCCTTAATTTGTTTTTTATTGCAGTGAGTGATACAAAAAAGTTGGGAGATGCTTCGAAGAGCACAAACCTTATA…	ATGTTTTCCTCCATGAATGTGGCGACGATGCAACCATTGAGTTTCTCTCGCCGGCTCGCTCCCTCTGCTGCTTCTCGAGCACTCTCTTTTTCTTCTTCTTCTTCTTCTTCTTCTTCTTCTTCTGTGACCGTTACTGGATATTCCCGTAGAAGCTCGGCTTACGCGCCCTCTCTCCGTTCGATCAAATGCGTCTCTGCACCACCGGAAGCTTCAATAGTGAGTGATACAAAAAAGTTGGGAGATGCTTCGAAGAGCACAAACCTTATACCAATTTACAGCTGCATATTCTCTGATCAGCTCACTCCTGTTCTTGCTTACCGTTGTCTTGTCAAAGAAGATGACCGTGAAGCTCCTAGTTTTCTTTTTGAGTCCGTTGAGCCTGGCTCTCAGATGTCCAGC…	MFSSMNVATMQPLSFSRRLAPSAASRALSFSSSSSSSSSSSVTVTGYSRRSSAYAPSLRSIKCVSAPPEASIVSDTKKLGDASKSTNLIPIYSCIFSDQLTPVLAYRCLVKEDDREAPSFLFESVEPGSQMSSVGRYSVVGAQPAMEIVAKENKVIVMDHKNGSMTEEYVEDPMEIPRQISESWNPDPQLVQDLPDAFCGGWVGFFSYDTVRYVEKRKLPFSKAPGDDRNLPDMHLGLYDDVIVFDHVEKKAYVIHWIRLDGSVPYEKAYSNGVQHLETLVAKLHDIEPPKLAAGNVNLQTRQFGPALENSNVTREEYKEAVVNAKEHILAGDIFQIVLSQRFERRTFADPFEVYRALRVVNPSPYMGYLQARGCILVASSPEILTKVKQNKIVNRPLA…
	BniB02g055340	ATGATCGACACCACCTCATTGCTTGCGTTTATTCTAGGTTTTTTCGTCCTTGCAGCATTAACAAGAATGAAGCGCAAGGAGACGAAGAAAACCTTGTTATTGACTTCAAACACAAGAAACCTCCCTCTCCCTCCCGGACCAAAACCCTGGCCTCTAATCGGAAACCTACCCGAAATACTATGGAGGAACAAACCGGTGTTTCGGTGGATACATTCCCTCATGGAAGAACTCGACACTGATATTGCATGCATCCCTCTCGCCAATACTCACGTCATTCCCGTGACATCCCCGCGGATTGCACAGGAGATTCTGAAGAAGCAAGACTCCATTTTCGCCACTAGGCCGCTGACTATGGGCACGGAGTACAGCAGCCGCGGGTACTTAACCATTGCGGTGGAG…	ATGATCGACACCACCTCATTGCTTGCGTTTATTCTAGGTTTTTTCGTCCTTGCAGCATTAACAAGAATGAAGCGCAAGGAGACGAAGAAAACCTTGTTATTGACTTCAAACACAAGAAACCTCCCTCTCCCTCCCGGACCAAAACCCTGGCCTCTAATCGGAAACCTACCCGAAATACTATGGAGGAACAAACCGGTGTTTCGGTGGATACATTCCCTCATGGAAGAACTCGACACTGATATTGCATGCATCCCTCTCGCCAATACTCACGTCATTCCCGTGACATCCCCGCGGATTGCACAGGAGATTCTGAAGAAGCAAGACTCCATTTTCGCCACTAGGCCGCTGACTATGGGCACGGAGTACAGCAGCCGCGGGTACTTAACCATTGCGGTGGAG…	MIDTTSLLAFILGFFVLAALTRMKRKETKKTLLLTSNTRNLPLPPGPKPWPLIGNLPEILWRNKPVFRWIHSLMEELDTDIACIPLANTHVIPVTSPRIAQEILKKQDSIFATRPLTMGTEYSSRGYLTIAVEPQGEQWKKMRRVVASHVTSQKSFRSTLKQRTEEADNLVRYINNLCVKNHGDGSEVIDIRLVVRQYSGNVARRMSFGVRHFGKGSEDGTGPGFEEIEHVDSLFKVVTHLYAFALSDYVPWLRFLDLEGHEKVVSGAMRNVNKYNDPFVDKRLEQWRNGKMNEPQDFLDMLILAKDTNGKPALSDEEIKAQVTELMLATVDNPSNAAEWAMAEMINEPSIMQKAVEEIDRVVGKERFVLESDIPSLNYLKACVKEAFRLHPVAPFNLP…
	BniB02g055360	ATGATCGATACCACCTCATTGGTTGCGTTTATTCTAAGTTTTCTCGTCCTTGCAGCATTAACAATGAAGCGCAAGGAGACGAAGAAAACCTTGTTATTGACTTCAAACACAAGAAACCTCCCTCTCCCTCCCGGACCAAAACCCTGGCCTCTAATCGGAAACCTACCCGAAATACTATGGAGGAACAAACCGGTGTTTCGGTGGATACATTCCCTCATGGAAGAACTCAACAGTGATATTGCATGTGTCCCTCTCGCCAACACTCACGTCATTCCCGTGACATCCCCTCGGATTGCACGGGAGATTCTGAAGAAGCAAGACTCCATTTTCGCCACTAGGCCGCTGACTATGGGCACGGAGTACAGCAGCCGCGGGTACTTAACCATTGCGGTGGAGCCA…	ATGATCGATACCACCTCATTGGTTGCGTTTATTCTAAGTTTTCTCGTCCTTGCAGCATTAACAATGAAGCGCAAGGAGACGAAGAAAACCTTGTTATTGACTTCAAACACAAGAAACCTCCCTCTCCCTCCCGGACCAAAACCCTGGCCTCTAATCGGAAACCTACCCGAAATACTATGGAGGAACAAACCGGTGTTTCGGTGGATACATTCCCTCATGGAAGAACTCAACAGTGATATTGCATGTGTCCCTCTCGCCAACACTCACGTCATTCCCGTGACATCCCCTCGGATTGCACGGGAGATTCTGAAGAAGCAAGACTCCATTTTCGCCACTAGGCCGCTGACTATGGGCACGGAGTACAGCAGCCGCGGGTACTTAACCATTGCGGTGGAGCCA…	MIDTTSLVAFILSFLVLAALTMKRKETKKTLLLTSNTRNLPLPPGPKPWPLIGNLPEILWRNKPVFRWIHSLMEELNSDIACVPLANTHVIPVTSPRIAREILKKQDSIFATRPLTMGTEYSSRGYLTIAVEPQGEQWKKMRRVVASHVTSHQSFRSTLEQRTEEADNLVRYINNLCVKNHGNGSEVIDIRLLVRQYSGNVARKMLFGVRHFGKGSEDGTGPGFEEIEHVDSLFKVVTHLYAFALSDYVPWLRFLDLEGHEKVVSGAMRNVNKYNDPFVDKRLEQWRNGKMNEPQDFLDMLILAKDTNGKPALSDEEIKAQVTELMLATVDNPSNAAEWAMAEMINEPSIMQKAVKEIDRVVGKERFVLESDIPSLNYLKACVKEAFRLHPVAPFNLPH…
	BniB02g055420	ATGATCGATACCACCTCATTGGTTGCGTTTATTCTAAGTTTTCTCGTCCTTGCAGCATTAACAATTAAGCGCAAGGAGACGAAGAAAACCTTGTTATTGACTTCAAACACAAGAAACCCCCCTCTCCCTCCCGGACCAAAACCCTGGCCTCTAATCGGAAACCTACCCGAAATACTATGGAGGAACAAACCGGTGTTTCGGTGGATACATTCCCTCATGGAAGAACTCAACAGTGATATTGCATGTATCCCTCTCGCCAACACTCACGTCATTCCCGTGACATCCCCTCGGATTGCACGGGAGATTCTGAAGAAGCAAGACTCCATTTTCGCCACTAGGCCGCTGACTATGGGCACGGAGTACAGCAGCCGCGGGTACTTAACCATTGCGGTGGAGCCA…	ATGATCGATACCACCTCATTGGTTGCGTTTATTCTAAGTTTTCTCGTCCTTGCAGCATTAACAATTAAGCGCAAGGAGACGAAGAAAACCTTGTTATTGACTTCAAACACAAGAAACCCCCCTCTCCCTCCCGGACCAAAACCCTGGCCTCTAATCGGAAACCTACCCGAAATACTATGGAGGAACAAACCGGTGTTTCGGTGGATACATTCCCTCATGGAAGAACTCAACAGTGATATTGCATGTATCCCTCTCGCCAACACTCACGTCATTCCCGTGACATCCCCTCGGATTGCACGGGAGATTCTGAAGAAGCAAGACTCCATTTTCGCCACTAGGCCGCTGACTATGGGCACGGAGTACAGCAGCCGCGGGTACTTAACCATTGCGGTGGAGCCA…	MIDTTSLVAFILSFLVLAALTIKRKETKKTLLLTSNTRNPPLPPGPKPWPLIGNLPEILWRNKPVFRWIHSLMEELNSDIACIPLANTHVIPVTSPRIAREILKKQDSIFATRPLTMGTEYSSRGYLTIAVEPQGEQWKKMRRVVSSHVTSHQNFRSTLEQRTEEADNLVRHINNLCVKNHGNGSEVIDIRLVVRQYSGNVARKMLLGVRHFGKGSKDGTGPGFEEIEHVDSLFKVVTHLYAFALSDYVPWLRFLDLEGHEKVVSGAMRNVSKYNDPFVDKRLEQWRNGKMNEPQDFLDMLILAKDTDGKPALSDEEIKAQVTELMLATVDNPSNAAEWAVAEMINEPSIMQKAVEEIDRVVGKERFVLESDIPSLNYLKACVKEAFRLHPVAPFNLPH…
	BniB02g063410	ATGAACGACTACTTCCTCAACGAGTCAACAACGGCCAGCGGCGACAACGCGTTGGCGGCGGCGGCGATGGAAGCTTTCATCGGGACAAACCACTCATCTCTCTGGCCACAACAACCACCTGTTCCTACTCCTTCTCTTCCCTCTCTCTCTCAGTTCAACGAAGACACTCTCCAGCAACGTCTCCAAGCTCTTATCGAATCCGCCGGCGAAGGATGGACTTACGCGATCTTCTGGCAGATCTCACACGACTTCGAATCTCCCAACGGAGACAACGCGGTGGTCCTCGGATGGGGAGACGGGTACTACAAAGGAGAAGAAGATAAAGAGAAGAAGAAGAAGAGCTCCAACTCGAACCCGGCGGAGCAAGAGCATCGGAAAAGAGTCATCCGTGAGCTTAAT…	ATGAACGACTACTTCCTCAACGAGTCAACAACGGCCAGCGGCGACAACGCGTTGGCGGCGGCGGCGATGGAAGCTTTCATCGGGACAAACCACTCATCTCTCTGGCCACAACAACCACCTGTTCCTACTCCTTCTCTTCCCTCTCTCTCTCAGTTCAACGAAGACACTCTCCAGCAACGTCTCCAAGCTCTTATCGAATCCGCCGGCGAAGGATGGACTTACGCGATCTTCTGGCAGATCTCACACGACTTCGAATCTCCCAACGGAGACAACGCGGTGGTCCTCGGATGGGGAGACGGGTACTACAAAGGAGAAGAAGATAAAGAGAAGAAGAAGAAGAGCTCCAACTCGAACCCGGCGGAGCAAGAGCATCGGAAAAGAGTCATCCGTGAGCTTAAT…	MNDYFLNESTTASGDNALAAAAMEAFIGTNHSSLWPQQPPVPTPSLPSLSQFNEDTLQQRLQALIESAGEGWTYAIFWQISHDFESPNGDNAVVLGWGDGYYKGEEDKEKKKKSSNSNPAEQEHRKRVIRELNSLISGGGGGVSDESNDEEVTDTEWFFLVSMTQSFANGVGLPGESFLNSRVIWLSGSGALTGSGCERASQGQIYGLQTMVCIAAENGVVELGSSEVISQSSDLMDKVNSLFNSNNGNGGEASSWGFGLNHPDQGENDPALWITEPATIEPVQSGSHKLEKNESSVENPRKNPFLVEQDFNFQAGSSKMMMKPNETLSFAAEESNKRRSPVSKGSNNNNEEGMLSFSTAVRSTAKSGESDHSDLEASVVKEAIVVEPEKKPRKRGRKP…
	BniB02g067910	ATGGAGTTTGAGTCAATGATAAAAATGCATTACCCATTCCTCACAGCTGTTCTCTATGATGACAATCTTTCCATAAAAGATTTCCATTCATCTCTTACCGATGATGTTTCATGTGTACAAAATGTGCATCATAGACCTTTTCAAGTTAATCTCGATAGATCACATTTCACATCCATCATAAACCTCACTCCTGATCTTTATCATAAGAATCTAACATCGAAAATCTCAAACACTACTTCCGATCATATTCCAAATCTAAATATTTCCCCATATCACTTTGATATCTTTAGAGGCATCACTCCTCCTCCATGCATTGAAGCTTTTGAGGCATACCTTCATGGTATATCCATTAACCCATATCTCTTTGATATGGCATATATCACATCATCAACATCCAAA…	ATGGAGTTTGAGTCAATGATAAAAATGCATTACCCATTCCTCACAGCTGTTCTCTATGATGACAATCTTTCCATAAAAGATTTCCATTCATCTCTTACCGATGATGTTTCATGTGTACAAAATGTGCATCATAGACCTTTTCAAGTTAATCTCGATAGATCACATTTCACATCCATCATAAACCTCACTCCTGATCTTTATCATAAGAATCTAACATCGAAAATCTCAAACACTACTTCCGATCATATTCCAAATCTAAATATTTCCCCATATCACTTTGATATCTTTAGAGGCATCACTCCTCCTCCATGCATTGAAGCTTTTGAGGCATACCTTCATGGTATATCCATTAACCCATATCTCTTTGATATGGCATATATCACATCATCAACATCCAAA…	MEFESMIKMHYPFLTAVLYDDNLSIKDFHSSLTDDVSCVQNVHHRPFQVNLDRSHFTSIINLTPDLYHKNLTSKISNTTSDHIPNLNISPYHFDIFRGITPPPCIEAFEAYLHGISINPYLFDMAYITSSTSKDVPNILHASREITMWRNDQPQGIIFGYNPIFNLAMDDSNLYEVSKPMGILSANEDDVINQCQNNQIVIKTDQIKKNKRLQMRRGCKPMKKASIIKGQWTSGEDRLLVQLVEHHGTKKWSHIAKMLQGRVGKQCRERWHNHLRPDIKKDGWSEEEDRILISAHKEIGNKWAEIARKLPGRTENTIKNHWNATKRRQHSRRSKGKDETSLAIGSRTLQNYIRSLTYKDDTIMTSSTFHENANTKIGQKNMRGKGKVVIVAASDYDKKN…
	BniB02g069920	ATGGAGAGAAACTTGAATAAGATGAAGAATAATAATACTAACTCAACAAGGAGCAATCTGGCGAAAGATAATGAACTGTTTCATGTGATTCACAAAGTTCCATGTGGAGATACTCCCTATGTCAAAGCCAAACATGCTCAGGTACATATTCTTCTTCTTTGAGTCATATATTGTTTTTCGGTTTTCTTTTTGTGAATCAAAATTTACAAGACTACACGTTCTTTCATATGATAGTTTCTGTCGGTTCCATTTAATGTTTTATGGATTTAATTTATAATGGGAAATATTCATGGTATAAGATAGAAGGGTAGAAATAAAAATGTCTGGTGTGATTTGGATTGGATGTTGCTGCATATTTTTTACCTGACAGATTAGTGAGTGACTTAGTAAATAAATATT…	ATGGAGAGAAACTTGAATAAGATGAAGAATAATAATACTAACTCAACAAGGAGCAATCTGGCGAAAGATAATGAACTGTTTCATGTGATTCACAAAGTTCCATGTGGAGATACTCCCTATGTCAAAGCCAAACATGCTCAGTTGATAGAGAAGAACCCGGAGATGGCAATAGTGTGGTTTTGGAAAGCCATCAACACAGGAGACAGAGTAGACAGTGCTCTCAAGGACATGGCCGTTGTAATGAAACAACTTGACCGTTCTGAAGAAGCCATCGAAGCCATCAAATCCTTTCGTCCTCGTTGTTCCAAGAACTCCCAAGATTCCCTCGACAATGTCCTCATCGACTTATACAAGAAATGTGGGAGAATGGAGGAACAAGTTGAGTTGTTGAAGAGGAAA…	MERNLNKMKNNNTNSTRSNLAKDNELFHVIHKVPCGDTPYVKAKHAQLIEKNPEMAIVWFWKAINTGDRVDSALKDMAVVMKQLDRSEEAIEAIKSFRPRCSKNSQDSLDNVLIDLYKKCGRMEEQVELLKRKLRQIYQGEAFNGKPTKTARSHGKKFQVTVQQEISRLLGNLGWAYMQQAKYLSAEAVYRKASMVEPDANKSCNLAMCLIKQGRFEEGRSVLDDVLESRVLGADDSRTRQRADELLSELEASLPRRRDAEMEDVLGNILDDDFVLGLEQITTSSFRSKRLPIFEQISSFRNQLVC-
	BniB02g075850	ATGTCCAGAAAGCCGTGTTGTGTCGGAGAAGGTCTGAAGAAAGGGGCATGGACCACCGAAGAAGATAAGAAACTCATCTCTTACATCCACGAACATGGGGAAGGAGGCTGGCGCGACATTCCCCAAAAAGCTGGTTAAATATATCTATGAAATTCTATACATGTTTATTAGTAATTTTTGTATGAAATTCTTGTGATGATTATGGTGTGTAATTAGGGTTAAAAAGGTGTGGAAAGAGTTGTAGACTGCGATGGACTAACTACCTAAAACCTGAGGTCAAAAGAGGCGAGTTTAGTTCAGAGGAGGAACAGATTATCATCATGCTTCATGCTTCTCATGGCAACAAGTATGTTACTATATGTTTATATTTGTGTGTATGCATCCTCGAATGAATAATGA…	ATGTCCAGAAAGCCGTGTTGTGTCGGAGAAGGTCTGAAGAAAGGGGCATGGACCACCGAAGAAGATAAGAAACTCATCTCTTACATCCACGAACATGGGGAAGGAGGCTGGCGCGACATTCCCCAAAAAGCTGGGTTAAAAAGGTGTGGAAAGAGTTGTAGACTGCGATGGACTAACTACCTAAAACCTGAGGTCAAAAGAGGCGAGTTTAGTTCAGAGGAGGAACAGATTATCATCATGCTTCATGCTTCTCATGGCAACAAGTGGTCAGTCATAGCGAGGCATTTACCTAGAAGAACAGATAACGAGGTCAAGAATTACTGGAACACGCATCTTAAAAAACGTTTGATTGAACAGGGTATTGATCCCGTTACTCACAAGCCACTAGCTTCTAATTCC…	MSRKPCCVGEGLKKGAWTTEEDKKLISYIHEHGEGGWRDIPQKAGLKRCGKSCRLRWTNYLKPEVKRGEFSSEEEQIIIMLHASHGNKWSVIARHLPRRTDNEVKNYWNTHLKKRLIEQGIDPVTHKPLASNSNPTVPTPPENLHSLAAPSSDKQYSRSSSMPSPSVTEFTNNDGTPVQGGSLSHKKRFKKWSSTSRLLNKVAAKATSIKEILSASMEGSLSATTLPYASYSNEEDGSNAFLTNTLVEFDPFSQSSLYSLHEINATSDLDMDNDFSHFFEKLGRDDHNEENDINVEYGHDLLMSDVSQEVSSTSVDNQDNMLGNFEGWSNYLIDHADFTYDAESDSLEKHFM-
	BniB02g076220	ATGGTAAGAACACCATGTTGCAAAGAAGAAGGAATAACGAAAGGAGCTTGGACTCCTGAGGAAGATCAAAAGCTTATTGCTTATCTTCAACTACGTGGTGAAGGTGGATGGCGTACTCTCCCGGAAAAAGCTGGTAATTCTTTCTTATTTTTCCTTATCATATATATATATATCGTTTAATCATTAAAAATTTTAATAATTAATTGACAGCTATTTTTTCTCTTATTTCTTACAATGTGTGCATATTATGAATATAGGACTGAAGAGATGTGGGAAGAGTTGTAGACTGAGATGGGCTAACTATCTAAGACCCGATATTAAGAGAGGAGAGTTTACTCCTGAAGAAGACGACATTATTATCAAGCTTCATGCTCTTAAGGGTAACAAGTAAGAATCTTT…	ATGGTAAGAACACCATGTTGCAAAGAAGAAGGAATAACGAAAGGAGCTTGGACTCCTGAGGAAGATCAAAAGCTTATTGCTTATCTTCAACTACGTGGTGAAGGTGGATGGCGTACTCTCCCGGAAAAAGCTGGACTGAAGAGATGTGGGAAGAGTTGTAGACTGAGATGGGCTAACTATCTAAGACCCGATATTAAGAGAGGAGAGTTTACTCCTGAAGAAGACGACATTATTATCAAGCTTCATGCTCTTAAGGGTAACAAGTGGGCCGCGATAGCAACTTGTTTGGCGGGACGAACAGACAACGAGATTAAAAATTATTGGAACACGAATCTCAAGAAGCGTCTAAAACAGAAAGGTATCGATCCAGTCACTCACAAACCAATTAATTCAACCGAC…	MVRTPCCKEEGITKGAWTPEEDQKLIAYLQLRGEGGWRTLPEKAGLKRCGKSCRLRWANYLRPDIKRGEFTPEEDDIIIKLHALKGNKWAAIATCLAGRTDNEIKNYWNTNLKKRLKQKGIDPVTHKPINSTDQTGSEPKKHKLGSSGSARLLNRVASKYSVDSNRDILTGIIIGNSTTIGDDSQNSGDVDSPTKNSTSALLNKMAAASSARTSIMINNTSTSPGFSDNCSFSDEFFSNEEISDMYMNVDDVGFIEELKGILSCGGADAGDIKDSPEVNVSDEMHFLDSWNEEDDLDLEKFVSSLDSKIGVFI-
	BniB02g076300	ATGGCTTCGTCACTTCTGACATCTCCCACAATGATCCCCACCACCGGTTCCACCTTGGTTCTCCGATCAGTCTTACCTTTTAGATCATCTTCCTTGCCCTCTCTACGCCTGAACCGTCCGTACAACAAGTCATCCTTGCTTATCTCATGTTGCTCCCCTGTGCCCGAAAAGGGGGAGACTAGTGCGAGTGGCCTCAAACCCGTCGTGGAAAGGTGGCCAGAGTACATACCGCACAAGCTTCCCGACAAAAATTACGTGCGTGTGTTCGACACGACGCTCCGCGACGGTGAACAGGCTCCCGGTGGAGCTCTTACTCCACCGCAGAAGCTCGAGATTGCAAGACAGCTCGCAAAACTCCGAGTAGACATCATGGAAGTCGGTTTTCCGGCGTCGTCTGAG…	ATGGCTTCGTCACTTCTGACATCTCCCACAATGATCCCCACCACCGGTTCCACCTTGGTTCTCCGATCAGTCTTACCTTTTAGATCATCTTCCTTGCCCTCTCTACGCCTGAACCGTCCGTACAACAAGTCATCCTTGCTTATCTCATGTTGCTCCCCTGTGCCCGAAAAGGGGGAGACTAGTGCGAGTGGCCTCAAACCCGTCGTGGAAAGGTGGCCAGAGTACATACCGCACAAGCTTCCCGACAAAAATTACGTGCGTGTGTTCGACACGACGCTCCGCGACGGTGAACAGGCTCCCGGTGGAGCTCTTACTCCACCGCAGAAGCTCGAGATTGCAAGACAGCTCGCAAAACTCCGAGTAGACATCATGGAAGTCGGTTTTCCGGCGTCGTCTGAG…	MASSLLTSPTMIPTTGSTLVLRSVLPFRSSSLPSLRLNRPYNKSSLLISCCSPVPEKGETSASGLKPVVERWPEYIPHKLPDKNYVRVFDTTLRDGEQAPGGALTPPQKLEIARQLAKLRVDIMEVGFPASSEEEFETVKTIAKTVGNEVDEETGYVPVICAIARSKLEDVKAAWEAVKYAKRPKILIFTSTSDIHMKYKLKKTKEEVIEMATSSVRFAKSLGFVDVQLGCEDGGRSEKEFLCKILGESIKAGATSVNVADTVGINLPEEYGELVRYLKANTPGIDDIIFSAHCHNDLGLATANTIAGVCAGARQVEVTVNGIGERSGNAPLEEVVMALKCRGEYLMDGVYTRINTRQIMATSQMVQEYTGLYVQPHKPIVGASCFVHESGIHQDGILK…
	BniB02g076310	ATGATCAACACCGGTTCCACCGTTGTCGTCCAGTCAGTTGTAAACGTTGCATCTTCCTTACACTCTTTCAGTCTTACCTGTCCACACAAAAAACCGCCCTTGTTCACCTCGTGTTGCTCCTTTTTGTCCAAAAAGGTTGTGACTGGTGCAACTCATGACCTCAAACCCATCGTGAAACAGTGGCCAGAGTATATACCAAACAAGCTCCCGGACAAAAACTATGTGCGTGTATTCGACACGACGCTCCGTGACGGGGAACAAGCCCCCGGTGCAGCACTTACTCCACCGCAGAAGTTAGAGATTGCCCGGCAGCTCTCCAAACTCCGAGTAGACATCATGGACGTTGGTTTTCCTGCGTCATCTGAGGAAGAGTTCGAAACCGTCAAGACCATCGCCAAG…	ATGATCAACACCGGTTCCACCGTTGTCGTCCAGTCAGTTGTAAACGTTGCATCTTCCTTACACTCTTTCAGTCTTACCTGTCCACACAAAAAACCGCCCTTGTTCACCTCGTGTTGCTCCTTTTTGTCCAAAAAGGTTGTGACTGGTGCAACTCATGACCTCAAACCCATCGTGAAACAGTGGCCAGAGTATATACCAAACAAGCTCCCGGACAAAAACTATGTGCGTGTATTCGACACGACGCTCCGTGACGGGGAACAAGCCCCCGGTGCAGCACTTACTCCACCGCAGAAGTTAGAGATTGCCCGGCAGCTCTCCAAACTCCGAGTAGACATCATGGACGTTGGTTTTCCTGCGTCATCTGAGGAAGAGTTCGAAACCGTCAAGACCATCGCCAAG…	MINTGSTVVVQSVVNVASSLHSFSLTCPHKKPPLFTSCCSFLSKKVVTGATHDLKPIVKQWPEYIPNKLPDKNYVRVFDTTLRDGEQAPGAALTPPQKLEIARQLSKLRVDIMDVGFPASSEEEFETVKTIAKTVGNEVDEETGYLPVICAVARCKHSDIEAVWEAVKYAKRPTILIFISTSDIHMKYKLKKTKEEVIEMAANSVRYAKSLGFNDIQFGCEDAGRSNKDFLCKILGEAIKAGATTANLADTVGINMPQEIRELVNYLKANTPGIDDVVFSIHCHNDLGFATANAIAGVCAGARQVDVTVNGIGERCGNAPLEEVVVALKRRGASAMDGVYTRIDTSQIMATSKMVQEYTGLYIQPHKPIVGANCFVHESDLHQRITDADLKATSKVW-
	BniB02g079220	ATGGAATCACAGAAACCCATGTTCCAAGTCGAAAACTTTGACGATGAGTTTGTTCATAAGCTGGTCTATGATGCTCTCGTTTGGTGTTCCCTTCACGGGCTTGTCGTTGGTGACAAAAACTATCAGGTTAGTTCCTGTCTTTTGATGTTCTTCTAATCAGGAGTTTTGGTCATGATGTGTTCCAATAAATTTGGAGAAAGATTCAAACTTTGATGATCTGTATGAGTCTTGTGTAGCTGATTTGATCATTGTCTTCGTCCTGTATGATCCCTGATCATACTCACTTGATCTGAATCAAGATTAGATATCACTTGTTATGGATGATAGAAAGAAGAAGTGTTTTTGATTACAGAAATCAGGAACAGTTCCAGGGGTTGGGATGATGCACGCCCCGATTTC…	ATGGAATCACAGAAACCCATGTTCCAAGTCGAAAACTTTGACGATGAGTTTGTTCATAAGCTGGTCTATGATGCTCTCGTTTGGTGTTCCCTTCACGGGCTTGTCGTTGGTGACAAAAACTATCAGAAATCAGGAACAGTTCCAGGGGTTGGGATGATGCACGCCCCGATTTCATTGCTACCAACTCCGTTCCCAGAAAGTTACTTTAAGCAAGCTTGTGAAGTTGCTCCTATCTTCAATGAATTGGTTGATCGTGTCAGCTTGGATGCCAAATTCATACAGGATAGTCTCTCAAGAACGAAAAAAGCCGATATCTTTACATCTAGACTTCTTGACATTCACTCCAAGATGCTGGAAAGCAACAAGAAAGAGGACATTCGCTTGGGTTTACACCGATCA…	MESQKPMFQVENFDDEFVHKLVYDALVWCSLHGLVVGDKNYQKSGTVPGVGMMHAPISLLPTPFPESYFKQACEVAPIFNELVDRVSLDAKFIQDSLSRTKKADIFTSRLLDIHSKMLESNKKEDIRLGLHRSDYMLDEETKSLLQIEMNTISCSFPGFGRLVTELHQSLLRSHGNHLGLDSERVPKNTSASQFADALAKAWLEYNNPRAVVMVVVQPDERNMYDQHWLSSILRGKHNIVTIRKSLAEVEKEGRVQEDGTLVVDGQAVAVVYYRSGYTPRDYPSESEWNARLLIEQSSAVKCPSIAYHLAGTKKIQQELAKPGVLERFMDNKDDIAKLRKCFAGLWSLDDPEIIKKAIEKPELFVMKPQREGGGNNIYGDDVRENLLRLQKEGEEENAA…
	BniB02g079650	ATGGCACTAGCAATCAACGTTTCTTCATCGTCTTCTGCGATCTCAACCTCTAGCTTCCCTTCTTCACACCTCAAAGCTCCACAAATCGGTTCGTTGAGGTTATCGGATCGAATCAATGTCTCATCGGCGTCTCTGAGTCTGTCCGGGAAACAATCCTCCGTGAAAGCTCTGAATGTGCAGTCAATCACAAAGGAATCGATGGTTCCTCCTCAAGCAGCATCCATGGTTGCTTCTGGTGAGTTCTGTTCATTTTGGATCTTGGTTTAGTTTTTTGTTGGTTAAGTTTATGCTAATGATCTTTGTCCCCTTTCTTACAAAACAGAGGTTACAGAGAAAGTAGTAGAAGTGGAAGACTTTGAGGAGCTAGCAAAGAAGCTAGAGAATGCTTCTCCTCTTGAA…	ATGGCACTAGCAATCAACGTTTCTTCATCGTCTTCTGCGATCTCAACCTCTAGCTTCCCTTCTTCACACCTCAAAGCTCCACAAATCGGTTCGTTGAGGTTATCGGATCGAATCAATGTCTCATCGGCGTCTCTGAGTCTGTCCGGGAAACAATCCTCCGTGAAAGCTCTGAATGTGCAGTCAATCACAAAGGAATCGATGGTTCCTCCTCAAGCAGCATCCATGGTTGCTTCTGAGGTTACAGAGAAAGTAGTAGAAGTGGAAGACTTTGAGGAGCTAGCAAAGAAGCTAGAGAATGCTTCTCCTCTTGAAATCATGGACAAGGCTCTTGAGAAGTTCGGAAACGACATTGCAATTGCGTTTAGTGGAGCAGAGGATGTTGCTCTGATAGAGTATGCT…	MALAINVSSSSSAISTSSFPSSHLKAPQIGSLRLSDRINVSSASLSLSGKQSSVKALNVQSITKESMVPPQAASMVASEVTEKVVEVEDFEELAKKLENASPLEIMDKALEKFGNDIAIAFSGAEDVALIEYAHLTGRPYRVFSLDTGRLNPETYRLFDTVEKHYGIRIEYMFPDAVEVQALVRNKGLFSFYEDGHQECCRIRKVRPLRRALKGLRAWITGQRKDQSPGTRSEIPVVQVDPVFEGLDGGAGSLVKWNPVANVEGNDVWSFLRTMDVPVNTLHAAGYVSIGCEPCTRAVLPGQHEREGRWWWEDAKAKECGLHKGNIKESSNGNATANVNGTTSTVVDIFKSENVVSLSRQGIENLMKLENRKEAWIVVLYAPWCPFCQAMEASFDELAD…
	BniB02g080290-1	ATGGCGCTAGTATTCTCTTCTTGCGGACTTGGTGCTGTAATGAACCTCAGTGCTTTGAAAACCTATGTTAGCTCCTCACCCAAGAAATCTCTTACTTGTGAAAGAAGCAAGATTGTTGCAGGCAACCAAGGGAATAAGGCAGCCGCTAATGCTTCTGCTGTAGTCGCGACCGAGCCACTGACTAAAGAAGATCTCATTGCTTATTTTTCTTCTGGTTGTAAAACAAAGGAAATGTGGAGGTACCACTACGATCATCCTCTTCTGTTTTTCTCTTTTAAAGTACTTAGTTGTCCCATCTCACCTTTTGTGTAGTTTTATGTATCGTATCTTTTGGGTTGGGTGTTCAGAATAGGTACAGAACACGAGAAAATCGGTTTTGATGTCAAGACTTTGCGCCCT…	ATGGCGCTAGTATTCTCTTCTTGCGGACTTGGTGCTGTAATGAACCTCAGTGCTTTGAAAACCTATGTTAGCTCCTCACCCAAGAAATCTCTTACTTGTGAAAGAAGCAAGATTGTTGCAGGCAACCAAGGGAATAAGGCAGCCGCTAATGCTTCTGCTGTAGTCGCGACCGAGCCACTGACTAAAGAAGATCTCATTGCTTATTTTTCTTCTGGTTGTAAAACAAAGGAAATGTGGAGAATAGGTACAGAACACGAGAAAATCGGTTTTGATGTCAAGACTTTGCGCCCTATGAAGTATGAACAAATAACTGCACTGCTTAATGGTATTTCTGAGAGATTTGATTGGGATAAGGTGATGGAGACTGGGACAATCATTGGTCTAAAACAGGGAATGCAA…	MALVFSSCGLGAVMNLSALKTYVSSSPKKSLTCERSKIVAGNQGNKAAANASAVVATEPLTKEDLIAYFSSGCKTKEMWRIGTEHEKIGFDVKTLRPMKYEQITALLNGISERFDWDKVMETGTIIGLKQGMQSISLERGGQLELSGAPLETLHQTYNELNSHLYQVKTVAEDLGIGFLGIGYEPKSSLEDATIVRKTRYDIIQDYLDRTGSGPDMGLKTCTVQIATALFANSPFSNGKPNGFLSIRSHLWIDTDKKRTGMIPFVFNDSFGFERYVEYALDVPMFFLHRNKSYLNCGGMTFRDFLSGKISHLSHEQPTINDWETHIGTIWPEVRLKRYLEMRGADGGSREMLCALPAFWVGLLYDEESLQTVLDMIADWTTEEREMLRTQVPVTGLKTM…
	BniB02g080290-2	ATGGCGCTCTTGTCTAAGGCAGGAGGAGCATACACTGTTCCTTCTGCTGGACCTCTATGCTCAAAGACTAGAACTAAAGCAGTTTCTGGTGGCGTGGATGTGTTGAGGATGAAAGATAGCTCCTACTACTCTAGGAGTCTTTCTACCAAATCGATGCTTTTACACTCGAATCATTCTGTTGAGAGGAGTAAGAGAGGGCATCAGTTGATTGTTGCGGCTAGCCCTCCTACGGATGAGGCTGCTGTTGCAGCTGAGCCGTTGACGAGAGAGGATCTCATTGCCTATCTTGCCTCTGGTTGCAAACCAAAGGATAAATGGAGGTACTTTCTTTGTTTGATGATGTACTTATCTGTTGGACCAATAATCCGTTTTGCTAAATTTGAGATTCTGAGTTTGCAG…	ATGGCGCTCTTGTCTAAGGCAGGAGGAGCATACACTGTTCCTTCTGCTGGACCTCTATGCTCAAAGACTAGAACTAAAGCAGTTTCTGGTGGCGTGGATGTGTTGAGGATGAAAGATAGCTCCTACTACTCTAGGAGTCTTTCTACCAAATCGATGCTTTTACACTCGAATCATTCTGTTGAGAGGAGTAAGAGAGGGCATCAGTTGATTGTTGCGGCTAGCCCTCCTACGGATGAGGCTGCTGTTGCAGCTGAGCCGTTGACGAGAGAGGATCTCATTGCCTATCTTGCCTCTGGTTGCAAACCAAAGGATAAATGGAGAATAGGTACAGAACATGAGAAGTTTGGTTTTGAGGTTAATACTCTGCGCCCTATGAAGTATGATCAGATAGCTGAGCTG…	MALLSKAGGAYTVPSAGPLCSKTRTKAVSGGVDVLRMKDSSYYSRSLSTKSMLLHSNHSVERSKRGHQLIVAASPPTDEAAVAAEPLTREDLIAYLASGCKPKDKWRIGTEHEKFGFEVNTLRPMKYDQIAELLNSIAERFEWEKVMEGDKIIGLKQGKQSISLEPGGQFELSGAPLETLHQTCAEVNSHLYQVKAVAEEMGIGFLGIGFQPKWRREDIPIMPKGRYDIMRNYMPKVGSLGLDMMLRTCTVQVNLDFSSEADMIRKFRAGLALQPIATALFANSPFTEGKPNGFLSMRSHIWTDTDKDRTGMLPFVFDDSFGFEQYVDYALDVPMYFAYRNKKYVDCTGMTFRQFLAGKLPCLPGELPTYNDWENHLTTIFPEVRLKRYLEMRGADGGP…
	BniB02g084810	ATGGTTGACCAGAAGAAGTTCGCTCTGTTTCTAGCGACGCCTGATTCAGAGTTCGTCAAGAAAGAGTACGGAGGGTACCACAACGTGTTCGTGGAGACGTTCGGAGACGAAGGAGAGCATTGGGACTCGTTTAGGGTCGTGGAAGGCGAGTTCCCCGATGAGAAAGATCTTGAGAAGTACGATGGTTTCGTTATTAGTGGAAGCTCTCACGATGCTTTTCAGAATGATGAGTGGATCCTTAAGCTATGTGAGACTGTCAAGAAAATTGATGAGATGAAGAAGAAAATTCTTGGCATCTGCTTCGGTCACCAGGTATCTTCTTCTTACCAATTATTTAGTTTATTATCACTTGTTTTATTCCTTTTTATTTCATACTGTTTGTTCAACACCTTAATTCAT…	ATGGTTGACCAGAAGAAGTTCGCTCTGTTTCTAGCGACGCCTGATTCAGAGTTCGTCAAGAAAGAGTACGGAGGGTACCACAACGTGTTCGTGGAGACGTTCGGAGACGAAGGAGAGCATTGGGACTCGTTTAGGGTCGTGGAAGGCGAGTTCCCCGATGAGAAAGATCTTGAGAAGTACGATGGTTTCGTTATTAGTGGAAGCTCTCACGATGCTTTTCAGAATGATGAGTGGATCCTTAAGCTATGTGAGACTGTCAAGAAAATTGATGAGATGAAGAAGAAAATTCTTGGCATCTGCTTCGGTCACCAGATCATAGCCAGAGTTAGAGGAGGAACAGTTGGAAGAGCAAGGAAGGGACTAGAGCTCGCACTTGGAAACATAACCATCGTCAAGGAT…	MVDQKKFALFLATPDSEFVKKEYGGYHNVFVETFGDEGEHWDSFRVVEGEFPDEKDLEKYDGFVISGSSHDAFQNDEWILKLCETVKKIDEMKKKILGICFGHQIIARVRGGTVGRARKGLELALGNITIVKDAITPGSYFGDEIPDSIAIIKLHQDEVLVLPEGAKVLAYSEKYEVEMFSIEDHLFCIQGHPEYNKEILFEIVDRVLRLGYIKQELADAAKASMENKGADRKLLEKICKNFLKGRVPAN-
	BniB02g088940	ATGAACACTTTTACCTCAAACTCTTCGGATCTCACTTCCACTACTACGCAAACATGGTCGTTCAGCAACATGTATCTCCTCACAACTCTTCAAGCCTTTGTGGCTATAACCTTAGCGATGCTTCTCAAGAAACTGATCACCCATCCCAATAAAAAGAAAATGTCTCTCCCGCCTGGACCTACCGGATGGCCCATCATCGGTATGATTCCAGCGATGCTAAAGAGCCGTCCTGTTTTCCGGTGGCTCCACAGCATCATGAAGCAGCTAAACACTGAGATAGCATGCGTGAGGCTAGGAAACACTCACGTGATCACCGTCACATGCCCTAAGATAGCACGTGAGATACTCAAGCAACAAGACGCTCTCTTCGCCTCAAGACCTATGACTTATGCACAAAAC…	ATGAACACTTTTACCTCAAACTCTTCGGATCTCACTTCCACTACTACGCAAACATGGTCGTTCAGCAACATGTATCTCCTCACAACTCTTCAAGCCTTTGTGGCTATAACCTTAGCGATGCTTCTCAAGAAACTGATCACCCATCCCAATAAAAAGAAAATGTCTCTCCCGCCTGGACCTACCGGATGGCCCATCATCGGTATGATTCCAGCGATGCTAAAGAGCCGTCCTGTTTTCCGGTGGCTCCACAGCATCATGAAGCAGCTAAACACTGAGATAGCATGCGTGAGGCTAGGAAACACTCACGTGATCACCGTCACATGCCCTAAGATAGCACGTGAGATACTCAAGCAACAAGACGCTCTCTTCGCCTCAAGACCTATGACTTATGCACAAAAC…	MNTFTSNSSDLTSTTTQTWSFSNMYLLTTLQAFVAITLAMLLKKLITHPNKKKMSLPPGPTGWPIIGMIPAMLKSRPVFRWLHSIMKQLNTEIACVRLGNTHVITVTCPKIAREILKQQDALFASRPMTYAQNVLSNGYKTCVITPFGEQFKKMRKVVMTELVCPARHRWLHQKRAEENDHLTAWVYNMVKNSGSVDFRFVTRHYCGNAIKKLMFGTRTFSENTAPDGGPTAEDIDHMEAMFEALGFTFAFCISDYLPMLTGLDLNGHEKIMRESSAIMDKYHDPIIDGRIKMWREGKRTQIEDFLDIFISIKDEEGNPLLTADEIKPTIKELVMAAPDNPSNAVEWAMAEMVNKPEILRKAMEEIDRVVGKERLVQESDIPKLNYVKAILREAFRLHP…
	BniB02g088950	ATGGAAGGCTTGGCTATCAGGGCATCGCGACCGTCCATCTTCTGCTCTCTTCCAGGTCTCAACGGCGGTTCTCACCGACGACCTCTAAGTGACGGTTTCCTCAGGCTTCCAACGTCATCAAATGCGGCGGATAAGCCAAAACTAGTCGCCAAGTCTGCTTCTTTCCATCCAATCTCTGCCGTCAATGTCTCTGCTCAAGCTTCCCTCACCGCCGATTTTCCCGCCCTTTCAGGTATTTTTCCACTTACAAGATTCTCCTCAAAATGCTAAAACCTACTACCTACGCTGTTTTTCTTTAAAAAATTTGTTCTGTTTTTGGTAGAAACAGATGTGAAAGAAGAGAGAATCAACGGAGACAAGAAGCCAGAGAACATCGTGTGGCACGAGAGTTCCATTTGC…	ATGGAAGGCTTGGCTATCAGGGCATCGCGACCGTCCATCTTCTGCTCTCTTCCAGGTCTCAACGGCGGTTCTCACCGACGACCTCTAAGTGACGGTTTCCTCAGGCTTCCAACGTCATCAAATGCGGCGGATAAGCCAAAACTAGTCGCCAAGTCTGCTTCTTTCCATCCAATCTCTGCCGTCAATGTCTCTGCTCAAGCTTCCCTCACCGCCGATTTTCCCGCCCTTTCAGAAACAGATGTGAAAGAAGAGAGAATCAACGGAGACAAGAAGCCAGAGAACATCGTGTGGCACGAGAGTTCCATTTGCAGATGCGACCGACAACAACTTCTTCAACAGAAGGGTTGTGTCATTTGGATCACTGGTCTCAGCGGCTCAGGGAAAAGCACTGTTGCGTGT…	MEGLAIRASRPSIFCSLPGLNGGSHRRPLSDGFLRLPTSSNAADKPKLVAKSASFHPISAVNVSAQASLTADFPALSETDVKEERINGDKKPENIVWHESSICRCDRQQLLQQKGCVIWITGLSGSGKSTVACALSKALFERGKLTYTLDGDNVRHGLNRDLTFKAEDRTENIRRIGEVAKLFADVGVICIASLISPYRRDRDECRSLLPEGDFVEVFMDVPLSVCESRDPKGLYKLARAGKIKGFTGIDDPYEAPLNCEVVLKHTGDDDSCSPRQMAEHIISYLQNKGYLEG-
	BniB03g001070	ATGATGAGTCAGAGAAGAGGAGGAGGAGGAGAGAGACTAGACTACAACGTTGTTCATAAGCTCCCTCACGGTGACAGCCCTTACGTCCGAGCCAAGCACGTTCAGGTAAAAGCATATACGATAATCCAAAATTGATTTGATTGGTTCTTAAGTCTGAAACTGAAACTTTGATGTGTTTGGTCGTCAGCTTGTGGAGAAGGATGCGGAAGCAGCGATAGAGCTGTTCTGGAGAGCAATTAAAGCGAGAGACAGAGTGGACAGCGCTCTTAAAGACATGGCTTTGCTTATGAAACAACAGAACAGAGCAGATGAAGCTGTTGATGCTATTCATTCATTTAGACATCTTTGTTCGAAGCAAGCTCAAGAATCACTCGACAATGTCCTCATCGATCTCTACAA…	ATGATGAGTCAGAGAAGAGGAGGAGGAGGAGAGAGACTAGACTACAACGTTGTTCATAAGCTCCCTCACGGTGACAGCCCTTACGTCCGAGCCAAGCACGTTCAGCTTGTGGAGAAGGATGCGGAAGCAGCGATAGAGCTGTTCTGGAGAGCAATTAAAGCGAGAGACAGAGTGGACAGCGCTCTTAAAGACATGGCTTTGCTTATGAAACAACAGAACAGAGCAGATGAAGCTGTTGATGCTATTCATTCATTTAGACATCTTTGTTCGAAGCAAGCTCAAGAATCACTCGACAATGTCCTCATCGATCTCTACAAGAAGTGTGGGAGAATAGAAGAGCAAGTTGAGCTGTTGAAGCAAAAGCTTTGGATGATATACCAAGGAGAAGCGTTCAACGGC…	MMSQRRGGGGERLDYNVVHKLPHGDSPYVRAKHVQLVEKDAEAAIELFWRAIKARDRVDSALKDMALLMKQQNRADEAVDAIHSFRHLCSKQAQESLDNVLIDLYKKCGRIEEQVELLKQKLWMIYQGEAFNGKPTKTARSHGKKFQVTVEKETSRILGNLGWAYMQLKDYTLAETVYRKAQVIEPDANKACNLCSCLIKQGKLVEARSVLFRDVLQEKKEGFDDGLRLKVRVQELLNELESREEEEAAAVLASVECGDGMDEIGVVEGFVKEWRRPFRTRRRLPIFEEILPLRDQLAC-
	BniB03g002340	ATGGTTTTCTCATCCAATTGGTCACAGGTTTCACTTCTTTGATCTTCCCTTACTAATGTTCTCTCTTAAATTCTTCATTGATATTTTGATTCGTTTTAGTAATAATTTTGATTCATTTCCAAAAGATTCCTATTCTCATCTTCTTTTCTATAACCCGCTTTCTTTAAAATTCAATATCTATAAATATGGTATTTCTTGCTTTACAAATTCAAATGATACCAGTGTCAAATTGAGTTTTCTTGGTTCTTTCTTTTATTTTCATTATATACTTCTTTGATTTTTTTTCCTCCTTTTTTTCAGCCTACGAATTCAAACCATCATCAGCATCAGCTTCATGAGAATGATAGTTTAGTGAGCGGCCAGGGATTACTTTCTCACCAACTTCCACCTTGCCCACCA…	ATGGTTTTCTCATCCAATTGGTCACAGCCTACGAATTCAAACCATCATCAGCATCAGCTTCATGAGAATGATAGTTTAGTGAGCGGCCAGGGATTACTTTCTCACCAACTTCCACCTTGCCCACCAAACCCTAACAACCACTATGCTGCTGCCGCCAGTGGTCTTCCGGCGAGGCTTGGTGGATCCATGGCCGAGAGAGCGAGGCAGGCCAAAGCTCCTCCACCTGAGGGAGCCCTAAAGTGTCCTCGATGCGACTCCATCAACACTAAGTTCTGTTACTACAACAACTACAACCTCACTCAGCCTCGCTACTTCTGCAAGGCTTGCCGCCGCTACTGGACACGTGGTGGCGCGCTGAGGAACGTCCCCGTGGGTGGAGGCTGCCGGAAGAATAGCAAA…	MVFSSNWSQPTNSNHHQHQLHENDSLVSGQGLLSHQLPPCPPNPNNHYAAAASGLPARLGGSMAERARQAKAPPPEGALKCPRCDSINTKFCYYNNYNLTQPRYFCKACRRYWTRGGALRNVPVGGGCRKNSKKGKNGNLKSSSSLSRQSSSTVNAPSSNSEQLRTNHQLPFLPSLHNLTQLGGIGLNLAATNGNNQTHQFGSSLMNDLGFLHVGNGRNTSAPITGNIHDNNNNNGAINNLMASAGSLSHFNLFDPTMGLHAFQNEGNIVNNVGISFSSASMVDSRAYQAAQVKMEDQTNLVNLSRPVSGLTSPGNQTNQYLWNSSDFSGPSSNDHHQLL-
	BniB03g004970	ATGGCACCCGCATGCAGCAGTAGATTCAACTCACTCCACGTGGCAGTCATCGGAGCCGGAGCCGCGGGACTCGCAGCCGCACGGGAGCTACGCAGAGAATCACACTCCGTCGTGGTCTTCGAACGCGGCGCACAAGTCGGAGGTCTCTGGGTATACACACCACAAACCGAACCCGACCCGCTCAGCCTCGACCCGAACCGAACCGTAGTCCACTCCAGCGTCTACGCCTCTCTCCGCACCAACCTCCCGAGAGAGTGCATGGGTTACAGAGACTTCCCTTTCGTGCCCCGAGAAGAGGAGGACGAGTCCAGAGACCCGAGAAGGTATCCGAGTCACGGTGAAGTCCTCGCTTACCTTCGAGACTTCGCGAGAGAGTTTGAGCTCGAGGAGATGGTTCGG…	ATGGCACCCGCATGCAGCAGTAGATTCAACTCACTCCACGTGGCAGTCATCGGAGCCGGAGCCGCGGGACTCGCAGCCGCACGGGAGCTACGCAGAGAATCACACTCCGTCGTGGTCTTCGAACGCGGCGCACAAGTCGGAGGTCTCTGGGTATACACACCACAAACCGAACCCGACCCGCTCAGCCTCGACCCGAACCGAACCGTAGTCCACTCCAGCGTCTACGCCTCTCTCCGCACCAACCTCCCGAGAGAGTGCATGGGTTACAGAGACTTCCCTTTCGTGCCCCGAGAAGAGGAGGACGAGTCCAGAGACCCGAGAAGGTATCCGAGTCACGGTGAAGTCCTCGCTTACCTTCGAGACTTCGCGAGAGAGTTTGAGCTCGAGGAGATGGTTCGG…	MAPACSSRFNSLHVAVIGAGAAGLAAARELRRESHSVVVFERGAQVGGLWVYTPQTEPDPLSLDPNRTVVHSSVYASLRTNLPRECMGYRDFPFVPREEEDESRDPRRYPSHGEVLAYLRDFAREFELEEMVRFETEVVCVDRDGRKWKIRSRSSDGVFKDEIFDSVVVCNGHYTEPRVAHVPGIDSWSGKQVHSHNYRVPDPFKDQVVVVIGNFASGSDISRDITGVAKEVHIASRSNPSETYEKLPGSNNLWLHSMIESARKDGSITFQNGKVVQADTIVHCTGYKYHFPFLNTNGYVTVDDNCVGPLYKHVFPPALAPGLSFIGLPWMTLQFFMFELQSKWVAAVLSGRVTLPSEDKMMEDVTAFYAKRDANKLPKRYTHRLGECQVDYLNWIAEQ…
	BniB03g007660	ATGGTGCGGACACCATGTTGCAAAGCTGAACTAGGGTTAAAGAAGGGAGCATGGACTCCCGAGGAAGATCAGAAGCTCGTCTCCTACGTCAACCGTCACGGTGAAGGTGGATGGCGTACTCTCCCCGAAAAAGCTGGTATTTTTTTATTTTCAATTTTTTTTTTATTCCGCCATATTTGAATATTCATTGTTTGGACTTTTTGGTCATTATCGATCAATGATTTTTAATATAAAATAATTCTTTAAATGATATAGGACTCAAGAGATGTGGCAAAAGCTGCAGACTGAGATGGGCTAATTATCTGAGACCTGACATCAAAAGAGGAGAGTTCACTGAAGATGAAGAACGTTCTATCATCTCTCTTCATTCCCTTCATGGTAACAAGTTAGTGTTTCTAT…	ATGGTGCGGACACCATGTTGCAAAGCTGAACTAGGGTTAAAGAAGGGAGCATGGACTCCCGAGGAAGATCAGAAGCTCGTCTCCTACGTCAACCGTCACGGTGAAGGTGGATGGCGTACTCTCCCCGAAAAAGCTGGACTCAAGAGATGTGGCAAAAGCTGCAGACTGAGATGGGCTAATTATCTGAGACCTGACATCAAAAGAGGAGAGTTCACTGAAGATGAAGAACGTTCTATCATCTCTCTTCATTCCCTTCATGGTAACAAATGGGCTGCAATCGCTCGTGGATTACCAGGAAGAACCGATAACGAAATCAAGAACCACTGGAACACTCATATCAAAAAAGGTTTGATCAAGAAAGGTGTCGATCCGGTTACACACAAGAGCTTGATCTCGGAC…	MVRTPCCKAELGLKKGAWTPEEDQKLVSYVNRHGEGGWRTLPEKAGLKRCGKSCRLRWANYLRPDIKRGEFTEDEERSIISLHSLHGNKWAAIARGLPGRTDNEIKNHWNTHIKKGLIKKGVDPVTHKSLISDKSENLQEIPEKQKVDVDLDIEKVKNSKKKSGLSSAGFLNRVANRFGKRINQSVLSDIIGSGGPLTTTTTSVTVNSESDKSSSSSFTPASDLLCQMTVNGNATSSPSTFSDASVNDSLMYCGNEDNLGFTNFLNDEDFMMLEESCVDNTEFMKELSRFLEEDVNDNDEMMPVYEHQDNINEIDNYFA-
	BniB03g008950	ATGGGAATACTTATTGAAGAAACCTTAAGCTCTAACCCCAAAAGCCAAATTGTTATTGATGATGATAATGAGTTGGGTTTGATGGCCGTGAGACTAGCCAATGCCGCTGCCTATCCAATGGTTCTCAAAGCCGCCCTTGAGCTCGGTGTCTTTGACACTCTCTACGCCGCTTCAGTGTTCCTCTCACCTTCCGAGATAGCAAGTAGGCTACCAACTACACCTCGTAACCCTGAGGCGCCGGCTTTGTTGGACAGGATGCTTCGTCTACTCGCTAGCTACTCCATGGTCAAGTGTGGTACGGTCCAAGCCGGAAAGGGCCAGAGGGTTTACAAAGCCGAACCAATATGCAGGTTCTTCTTGAAAGATAACATTCAAGATATAGGATCCTTAGCTTCTCAA…	ATGGGAATACTTATTGAAGAAACCTTAAGCTCTAACCCCAAAAGCCAAATTGTTATTGATGATGATAATGAGTTGGGTTTGATGGCCGTGAGACTAGCCAATGCCGCTGCCTATCCAATGGTTCTCAAAGCCGCCCTTGAGCTCGGTGTCTTTGACACTCTCTACGCCGCTTCAGTGTTCCTCTCACCTTCCGAGATAGCAAGTAGGCTACCAACTACACCTCGTAACCCTGAGGCGCCGGCTTTGTTGGACAGGATGCTTCGTCTACTCGCTAGCTACTCCATGGTCAAGTGTGGTACGGTCCAAGCCGGAAAGGGCCAGAGGGTTTACAAAGCCGAACCAATATGCAGGTTCTTCTTGAAAGATAACATTCAAGATATAGGATCCTTAGCTTCTCAA…	MGILIEETLSSNPKSQIVIDDDNELGLMAVRLANAAAYPMVLKAALELGVFDTLYAASVFLSPSEIASRLPTTPRNPEAPALLDRMLRLLASYSMVKCGTVQAGKGQRVYKAEPICRFFLKDNIQDIGSLASQVIVNLDSVFLNTWAQLKDVVLEGGDAFGRAHGGMKLFDYMGTDERFSKLFNQTGFTIAVVKKALEVYQGFEDVNVLVDVGGGVGNTLGVVTSKYPNIKGINFDLTCALAQAPTYPRVEHVAGDMFVEVPAGDAMILKRILHDWTDEDCVKILKNCWKSLPENGKVVVIELVTPDSAESGDINSNIAFDMDMLMFTQCSGGKERSRAEFETLAMESGFTHCKFVCQAYHCWVIEFCKENV-
	BniB03g008960	ATGGGATTCCCTTTTGAAGAAACCTTGAGCTCTAACCCCAAAACCCAAACTATTGTTGATGATGATAATGAGTTGGGTTTGATGGCCGTGAGACTAGCCAATGCCGCAGCCTTTCCAATGGTTCTCAAGGCCTCTCTCGAGCTCGGTGTTTTTGACACTCTCTACGCCGAAGCTGCTCGTACCGAAGCCTTCCTCTCACCATCTGAGATAGCGAGTAGGCTACCAACTACTCCACGTAACCCTGAGGCGCCGGTTTTGTTGGACCGGATGCTTCGTCTACTCGCTAGCTACTCCATGGTCAGATGCGATAAAGCTGGGAAGGGCGAGAGAGTCTATAGAGCCGAGCCGATTTGCAGGTTCTTCTTGAAAGATAACATTCAAGATATTGGATCCCTTGCA…	ATGGGATTCCCTTTTGAAGAAACCTTGAGCTCTAACCCCAAAACCCAAACTATTGTTGATGATGATAATGAGTTGGGTTTGATGGCCGTGAGACTAGCCAATGCCGCAGCCTTTCCAATGGTTCTCAAGGCCTCTCTCGAGCTCGGTGTTTTTGACACTCTCTACGCCGAAGCTGCTCGTACCGAAGCCTTCCTCTCACCATCTGAGATAGCGAGTAGGCTACCAACTACTCCACGTAACCCTGAGGCGCCGGTTTTGTTGGACCGGATGCTTCGTCTACTCGCTAGCTACTCCATGGTCAGATGCGATAAAGCTGGGAAGGGCGAGAGAGTCTATAGAGCCGAGCCGATTTGCAGGTTCTTCTTGAAAGATAACATTCAAGATATTGGATCCCTTGCA…	MGFPFEETLSSNPKTQTIVDDDNELGLMAVRLANAAAFPMVLKASLELGVFDTLYAEAARTEAFLSPSEIASRLPTTPRNPEAPVLLDRMLRLLASYSMVRCDKAGKGERVYRAEPICRFFLKDNIQDIGSLASQVIVNFDSVFLNTWAQLKDVVLEGGDAFGRAHGGMKLFDYMGTDERFSKLFNQTGFTIAVVKKALEVYQGFKDVNVLVDVGGGVGNTLGVVTSKYPDIKGINFDLTCALAQAPSYPGVEHVAGDMFVDVPKGDAMILKRILHDWTDEDCIKILKNCWKSLPENGKVVVIELVTPDDAENGDINANIAFDMDMLMFTQCSGGKERSRAEFEALAVASGFTHCKFVCQAYHCWIIEFCKENV
	BniB03g010940	ATGGTGGTGGAGCATCAGCAACATCACAAGAAGACGAAGAAGAGGTTCGCTCTGTTTCTGGCCACGTGCGACTCGGAGTTGGTGAAGAAAGCTTACGGTGGCTACTTCAACGTCTTCGTCTCCACTTTCGGCGGCGACGAAGAAGGCGAGCAATGGGATCTCTTCCGAGTCGTCGACGGCGATTTCCCCGGCGACGACGATCTCGATGACTACGACGGTTTCGTCATCAGCGGTAGCCCGCACGACGCCTTCGCGGACGCTGATTGGATCGTCAAGCTTTGCTCGCTTTGTCAGAAGCTTGATGAGATGAAGAAGAAGGTTCTCGGCATCTGTTTCGGCCACCAGGTAATAAAAAAAGAAGGTTTCTTTCTTTTGATTTGATTTGATTTGGATCTGATC…	ATGGTGGTGGAGCATCAGCAACATCACAAGAAGACGAAGAAGAGGTTCGCTCTGTTTCTGGCCACGTGCGACTCGGAGTTGGTGAAGAAAGCTTACGGTGGCTACTTCAACGTCTTCGTCTCCACTTTCGGCGGCGACGAAGAAGGCGAGCAATGGGATCTCTTCCGAGTCGTCGACGGCGATTTCCCCGGCGACGACGATCTCGATGACTACGACGGTTTCGTCATCAGCGGTAGCCCGCACGACGCCTTCGCGGACGCTGATTGGATCGTCAAGCTTTGCTCGCTTTGTCAGAAGCTTGATGAGATGAAGAAGAAGGTTCTCGGCATCTGTTTCGGCCACCAGATAATAACAAGAGTCAAAGGAGGGAAAATAGGAAGGGCTCGTCAAGGCCCAGAC…	MVVEHQQHHKKTKKRFALFLATCDSELVKKAYGGYFNVFVSTFGGDEEGEQWDLFRVVDGDFPGDDDLDDYDGFVISGSPHDAFADADWIVKLCSLCQKLDEMKKKVLGICFGHQIITRVKGGKIGRARQGPDMGLRTITIAKDNEKLGLYFGDDVPASLAIVKCHQDEVLELPDSATVLASSEVCQVEMFSIGDHFLCIQGHPEYNKEILFEIVDRVLNMKLMEQEFADKAKSTMETAQPDKDLWQKLCKNFLKGQI
	BniB03g010950	ATGGTTGAGCAGAAAAGGTTCGCTCTGTTTCTAGCGACTCTTGATTCAGAGTTCGTGAAGAAAACGTACGGAGGATACCACAACGTGTTTGTGGAGACGTTTGGAGACGAAGGAGAGCACTGGGACTCGTTTCGGGTTGTCGAGGGAGAGTTTCCTGAGGAGAAAGATCTCGAGAAGTACGATGGTTTTGTTATTAGCGGAAGCTCTCATGATTCGTTCGAGAATGACCCTTGGATTCTTAAGCTATTGTCAAGAAACTTGATGAGATGAAGAAGAAAGTTCTTGGCATCTGCTTCGGTCATCAGGTTCTATTCTTCTTTTTCCTATTATTATTATTATTATTATTATTATTATTATTATTATTATCCCCTTTTAGAATTTTTTAATTTATTCACTAAT…	ATGGTTGAGCAGAAAAGGTTCGCTCTGTTTCTAGCGACTCTTGATTCAGAGTTCGTGAAGAAAACGTACGGAGGATACCACAACGTGTTTGTGGAGACGTTTGGAGACGAAGGAGAGCACTGGGACTCGTTTCGGGTTGTCGAGGGAGAGTTTCCTGAGGAGAAAGATCTCGAGAAGTACGATGCTATTGTCAAGAAACTTGATGAGATGAAGAAGAAAGTTCTTGGCATCTGCTTCGGTCATCAGATCATAGCCAGAGTAAGAGGAGGAACAGTGGGAAGAGCAAGGAAGGGACCAGAACTTAAGCTTGCAGACATAACCATCGTGAAAGATGCGATTAAACCGGGAAGTTACTTCGGAAACGAGATCCCGGATAGCTTAGCGATCATAAAATTGCAC…	MVEQKRFALFLATLDSEFVKKTYGGYHNVFVETFGDEGEHWDSFRVVEGEFPEEKDLEKYDAIVKKLDEMKKKVLGICFGHQIIARVRGGTVGRARKGPELKLADITIVKDAIKPGSYFGNEIPDSLAIIKLHQDEVLVLPETARVLAYSDKYEVEMFTIEDHFFCIQGHPEYNRDILFEIVDRVLRLGYITQEMADSAKATLENRGADRKLLETICKNFLKGRVPAN-
	BniB03g014280	ATGTTTTACTATATGATTTTTCTCCCTTTAGCTCTCTTTCTTGTGGCTTACAAACTCATCTCCACATCCAAAAAGCAACGTTCCAACCTCCCTCCTTCTCCGCCTTACGCTCTCCCCATCCTCGGCCACCACCTCCTCATCAAACCACCGGTCCACCGTCTCTTCCACCGCCTCTCAGAGACCTACGGCCCAATCTTCTCCCTCCGAGTTGGCTACCGCCGCACCGTCGTGATCTCCTCCTCCTCACTCGCGTCAGAGTGCTTCACGGGCCAAAACGACATCCTCTTATCAAACCGGCCTTGTTTCCTAACCGCAAAATACGTTGCATACAACTACACAACCGTAGGGACCGCTCCTTACGGCGACCACTGGCGCAACCTCCGCCGCGTCTGCTCCCTA…	ATGTTTTACTATATGATTTTTCTCCCTTTAGCTCTCTTTCTTGTGGCTTACAAACTCATCTCCACATCCAAAAAGCAACGTTCCAACCTCCCTCCTTCTCCGCCTTACGCTCTCCCCATCCTCGGCCACCACCTCCTCATCAAACCACCGGTCCACCGTCTCTTCCACCGCCTCTCAGAGACCTACGGCCCAATCTTCTCCCTCCGAGTTGGCTACCGCCGCACCGTCGTGATCTCCTCCTCCTCACTCGCGTCAGAGTGCTTCACGGGCCAAAACGACATCCTCTTATCAAACCGGCCTTGTTTCCTAACCGCAAAATACGTTGCATACAACTACACAACCGTAGGGACCGCTCCTTACGGCGACCACTGGCGCAACCTCCGCCGCGTCTGCTCCCTA…	MFYYMIFLPLALFLVAYKLISTSKKQRSNLPPSPPYALPILGHHLLIKPPVHRLFHRLSETYGPIFSLRVGYRRTVVISSSSLASECFTGQNDILLSNRPCFLTAKYVAYNYTTVGTAPYGDHWRNLRRVCSLEILSSNRLTNFLHIRKDEIRRMLTRLTREVNKEIELEPLLSDLTFNNIVRMVTGKRYYGDEVHNEEEANLFKKLVADVNDCSGARHPGDYLPFFKIFGGTFEKKVKAVGEAMDEILQRLLDECRVDKDGNTMVNHLLSLQEQEPDYYTDVTIKGLMLGMMIAGTDTSAVTLEWAMACLLRHPESLEKARLEIEDKIGQERLIDEPDLANLPYLQNIVSETFRLYPAAPLLVPRSTTEDIKVGGYDVPRGTMVMVNAWAIHRDPILW…
	BniB03g014290	ATGTTTTGGCTGATAATAACAAAGTTTCCCGACCTTAAAAACGTAATAGTAAAAACGATAATGATCCTAGTGTGTTTAGTTTGGAATTTTGAATAGTTGTATTAAAATAATAATATTGTATCATATCAAATATAATTTTAAGAAAATTAATGTTACTGTGACAACTTGTTCACTAGTCTTCTAATCCAACGACGAATTATGCAGCCACTAAACTATTTAGATTTAGGTGAGTGCTATTTTAATTTGTCGCGCTAGAATAAAAATATCGCATCTCAATGCTAAAAATGCGAAGTAATCTCTATAAAATGAAGCAATTAACAGCGTTGGATTGATATATTTTTATATTAAAAATGCTATGAGTACGACCCTTGGTCTTAGCAGACTCTTTTTCTTTTGCTA…	ATGTTTTGGCTGATAATAACAAAGTTTCCCGACCTTAAAAACAACGTGAGAAAACTGTTTTACTATGTGATTCTCGCTTTAGCTCTCCTTGTCATTGCTTACAAGTTCATCTTCGGCTATAAAACTCAACGTTACAACCTCCCTCCGTCTCCGCCTAACTCTCTCCCCATTATCGGCCACCACCGCCTCATCAAACCCCCTGTCCACCGTCTATTTCACGGACTCGCCAAAACACACGGCCCAATCTTCTACCTCCGACTAGGTACCCGCCGTGCGGTTGTCATCTCTTCTTTCGCACTCGCAAGAGAATGCTTCACGGGTCACAACGACGTAGTTGTATCAAACCGCCCTCGTTTTTTAACTTCCAAATACATCGCTTACAACTACACAACCATTGCA…	MFWLIITKFPDLKNNVRKLFYYVILALALLVIAYKFIFGYKTQRYNLPPSPPNSLPIIGHHRLIKPPVHRLFHGLAKTHGPIFYLRLGTRRAVVISSFALARECFTGHNDVVVSNRPRFLTSKYIAYNYTTIATTPYGDHWRNLRKICSLEIVSSKRLANFLHIRKEEIHRMLTRLSRDALISKEVELESLFYDLTFNNIVRMVTGKVYYGEDASDKAEADTFKKLIAYITSTSGARHPGEYLPFLKIFGRSFEKKVKAVGEAMDAILQRLLDECRGNKDGNTMVNHLLSLQQQDPEYYSEVIIKGLMLGIMFAASETSAVTIEWAMASLLNHPDLLEKLKLEIDEKIGQDRLIEETDIPNLPYLQNVVSETLRLYPAAPLLVPRLTVEDIKIGGYDVP…
	BniB03g014770	ATGTATCTCCTCACAGTGCTTCAAGCCTTGGTGACTATAACCCTAGTGCTGCTTCTCAAAAAACTGATCACGAATCGAAACAAAAAGAAATTGTCTCTCCCACCAGGTCCCACCGGATGGCCTATCATCGGAATGATTCCAGCGATGCTAAAGAGCCGTCCCGTTTTCCGGTGGCTCCACAGCATCATGAAGCAGCTAAACACTGAGATAGCCTGCGTGACGCTAGGAAACACTCACGTGATCACCGTCACGTGCCCTAAGATAGCACGTGAGATACTCAAGCAACAAGACGCTCTATTCGCCTCAAGACCTATGACTTACGCACAGAACGTCCTCTCTAACGGCTACAAAACCTGCGTGATCACTCCGTTCGGTGAACAGTTCAAGAAAATGAGGAAA…	ATGTATCTCCTCACAGTGCTTCAAGCCTTGGTGACTATAACCCTAGTGCTGCTTCTCAAAAAACTGATCACGAATCGAAACAAAAAGAAATTGTCTCTCCCACCAGGTCCCACCGGATGGCCTATCATCGGAATGATTCCAGCGATGCTAAAGAGCCGTCCCGTTTTCCGGTGGCTCCACAGCATCATGAAGCAGCTAAACACTGAGATAGCCTGCGTGACGCTAGGAAACACTCACGTGATCACCGTCACGTGCCCTAAGATAGCACGTGAGATACTCAAGCAACAAGACGCTCTATTCGCCTCAAGACCTATGACTTACGCACAGAACGTCCTCTCTAACGGCTACAAAACCTGCGTGATCACTCCGTTCGGTGAACAGTTCAAGAAAATGAGGAAA…	MYLLTVLQALVTITLVLLLKKLITNRNKKKLSLPPGPTGWPIIGMIPAMLKSRPVFRWLHSIMKQLNTEIACVTLGNTHVITVTCPKIAREILKQQDALFASRPMTYAQNVLSNGYKTCVITPFGEQFKKMRKVVMTELVCPARHRWLHQKRAEENDHLTAWVYNMVKNSGSVDFRFVTRHYCGNAIKKLMFGTRTFSENTAPDGGPTAEDIEHMEAMFEALGFTFAFCISDYLPMLTGLDLNGHEKIMRDSSAIMDKYHDPIIDERIKMWREGKRTQIEDFLDIFISIKDEEGNPLLTGDEIKPTIKELVMAAPDNPSNAVEWAMAEMVNKPEILRKAMEELDRVVGKEILVQESDIPKLNYVKAILREAFRLHPVAAFNLPHVALSDATVAGYHIPK…
	BniB03g014780	ATGGAAGGATTAGCTATAAGAGCATCTCGACCATCAATTTTCTGCTCTCTTCCGGGTCTCGATGGTGATTCTCAGCGACGACCTCTAAGTGACGGTTTCCTCAGGCTGCCGGCGTCGTCTAATGCGGCGGTTAACGCAAACTTAGTCGCGAGTTCTGTTTCTTTTCATCCAGTCCCCGCCGTCAATGTGTCTGCACAAGCTTCCCTCACCGCCGATGTCCCCGCCCTTTCAGACAACATCGTGTGGCACGAGAGTTCCATATGCAGATGCGACCGACAACCACTTATTCAACAAAAGGGCTGTGTCATCTGGATCACTGGTCTCAGCGGTTCAGGTAAAAGCACTGTTGCGTGTGCGCTAAGTAAAGCATTGTTTGAAAGAGGCAAACTTGCTTACACA…	ATGGAAGGATTAGCTATAAGAGCATCTCGACCATCAATTTTCTGCTCTCTTCCGGGTCTCGATGGTGATTCTCAGCGACGACCTCTAAGTGACGGTTTCCTCAGGCTGCCGGCGTCGTCTAATGCGGCGGTTAACGCAAACTTAGTCGCGAGTTCTGTTTCTTTTCATCCAGTCCCCGCCGTCAATGTGTCTGCACAAGCTTCCCTCACCGCCGATGTCCCCGCCCTTTCAGACAACATCGTGTGGCACGAGAGTTCCATATGCAGATGCGACCGACAACCACTTATTCAACAAAAGGGCTGTGTCATCTGGATCACTGGTCTCAGCGGTTCAGGTGAGGTGGCTAAGCTGTTTGCTGATGTTGGAGTCATTTGTATAGCAAGTTTGATTTCTCCGTAC…	MEGLAIRASRPSIFCSLPGLDGDSQRRPLSDGFLRLPASSNAAVNANLVASSVSFHPVPAVNVSAQASLTADVPALSDNIVWHESSICRCDRQPLIQQKGCVIWITGLSGSGEVAKLFADVGVICIASLISPYRRDSCCRQATSWRYVNVFMDVPLSVCESRDPKGLYKLACAGKIKGFTGIDDPYEAPLNCEVVLKQHTEDDVSCSPRQMAENIISYLQDKGYLEG-
	BniB03g016310	ATGAATGTAATGACCGAGCCGACGATGAATCTCTGGACCACCGACGATAACGCCTCTATGATGGAAGCTTTCATGAGCACCTCCTCCGACATCTCAGCCATATGGCCACCGGAAACGGCGTCGACTACAGCTCCGGCACCGGCGGGATTTAACGATGAGACTCTCCAGCAGAGGCTACAAGCACTGATTGAAGGGACAAACGAAGGGTGGACCTACGCTATATTCTGGCAGCCGTCGTACGACTTCTCCGGCGCCTCCGTGCTCGGATGGGGAGATGGCTATTACAAAGGAGAAGAAGACAAGGGAAAGGCCAGAGAGAGATCGATTCCACCGCCGTTTTCGACTCCGGCGGATCAGGAGTATCGTAAGAAGGTGTTGCGTGAGCTCAACTCGTTGATC…	ATGAATGTAATGACCGAGCCGACGATGAATCTCTGGACCACCGACGATAACGCCTCTATGATGGAAGCTTTCATGAGCACCTCCTCCGACATCTCAGCCATATGGCCACCGGAAACGGCGTCGACTACAGCTCCGGCACCGGCGGGATTTAACGATGAGACTCTCCAGCAGAGGCTACAAGCACTGATTGAAGGGACAAACGAAGGGTGGACCTACGCTATATTCTGGCAGCCGTCGTACGACTTCTCCGGCGCCTCCGTGCTCGGATGGGGAGATGGCTATTACAAAGGAGAAGAAGACAAGGGAAAGGCCAGAGAGAGATCGATTCCACCGCCGTTTTCGACTCCGGCGGATCAGGAGTATCGTAAGAAGGTGTTGCGTGAGCTCAACTCGTTGATC…	MNVMTEPTMNLWTTDDNASMMEAFMSTSSDISAIWPPETASTTAPAPAGFNDETLQQRLQALIEGTNEGWTYAIFWQPSYDFSGASVLGWGDGYYKGEEDKGKARERSIPPPFSTPADQEYRKKVLRELNSLISGGGGPTTEDAVDEEVTDTEWFFLVSMTQSFACGSGLAGKAFSTGHAVWVSGSDQLTGSGCERAKQGGVFGMQTIACIPSPNGVVELGSTEQIRQSSDLMNKVRVLFNFNAGAGDLSGLNWNLDPDQGENDPSMWINDPIGVPEQGTGAPSSSSQLFAKSIQFENGGSSSTVTENPNPDPTPSPVSQTQNPKFSNNFSRELNFSTSSTTLVKPRPGEILSFGDEGKRSSVNPDPSSYSGQTQFENKRKKSVGLSSDDKVLTFGGES…
	BniB03g018400	ATGTCGTCGGAGATGAAACAGCTGATCGTCGTGGCAGAAGGCACCGCAGCGTTGGGTCCTTACTGGCAAACCATCCTCTCCGACTATCTCCACAAAATCATCAGGTTTTCTAACAATAATAATCCCCTTTTCCGTGTTTAGGGTTTCTGATCTTAATTTCATCGGTAGCTAAGATCGTTGAGTGATTTACTGTTCTGATATGTTTGATTATGTTCTTTGATTTAGCCTCAATTGTGGTTTCGTATTTAATTCATTTTTTTTTTCATCTATAAAGCAGAATGTATATGTAATTGGTTAACTCAGTTATGTTGAAATTGGTATTAACAATTTTGGTTAAGTCTCACAAAGCTCTTTGAACTCCTCTATTACTGTATGTATCTCTAAGAGCCAGGGAGAAGT…	ATGTCGTCGGAGATGAAACAGCTGATCGTCGTGGCAGAAGGCACCGCAGCGTTGGGTCCTTACTGGCAAACCATCCTCTCCGACTATCTCCACAAAATCATCAGGTCTTTCTGTGGCAGTGAGATAAATGGAGAGAGGAACCCTGTTTCGAATGTGGAGCTAGCGCTGGTCATCTTCAATTCTCATGGTTCATATTGTGGTTGCTTGGTTCAGAGGAGTGGCTGGACGAGAGATGTTGATATTTTCTTTCATTGGCTTTCATCCATACAATTTGCCGGCGGTGGTTTCAATGAAGCCGCCACAGCAGAAGGTCTTGCCGAAGCGTTAATGATGTTTCCTCCTCCTTCAGGCCAAGCTCAACCAAGTAATGATCTGAAAAGGCACTGTATCTTAATCACA…	MSSEMKQLIVVAEGTAALGPYWQTILSDYLHKIIRSFCGSEINGERNPVSNVELALVIFNSHGSYCGCLVQRSGWTRDVDIFFHWLSSIQFAGGGFNEAATAEGLAEALMMFPPPSGQAQPSNDLKRHCILITASNPYSLPTPVYRPKFQNGENGDVQPESRLSDAETVASYFSRCSVSLSVVCPKQLPKIRALYNVGKLNPQSPDLSIDTVKNTFYLVLISENFVEARAALSHSATNVPQTQSPVKMDRAIVAPSLPVTGPPPASVPSANGPILNRQPVSVGPVPTATVKVEPSTVSSMAAVPTFPHIPSVARPASQAIPSVQTSSASSVSQEMVTNAENAPDVKPVVSGMTPPLRTGPPGNVNLLNNLSQVRQAMSSAALAGAASSAGQSAVAMHVS…
	BniB03g021390	ATGAAGTATGATCAAATAGCTGAGCTGCTTAACAGTATCGCTGAGAGATTTGAATGGGAAAAAGTAATGGAAGGTGATAAGATCATTGGTCCCAAGCAGGTATGCCTTCCTCTCTGTTTCATCTTACGAGCTGCTCTTTCTAAAATACGTTTCCAGCCTCTTAGCTTTGATGTACACGATGATTCCTTCTGGTCATTTTGTTGATCAGGGGAAACAAAGCATTTCACTTGAACCTGGTGGTCAATTCGAGCTTAGTGGTGCACCTCTTGAGACTCTGCACCAAACATGTGCTGAAGTCAATTCACACCTTTATCAGGTAATTTGAGAGATAATAATTGCCAATACCCTTACCCTAAAATGCTACAAAAAAAAAAAAAACCAACTATCTAATGGTGTTAT…	ATGAAGTATGATCAAATAGCTGAGCTGCTTAACAGTATCGCTGAGAGATTTGAATGGGAAAAAGTAATGGAAGGTGATAAGATCATTGGTCCCAAGCAGGGGAAACAAAGCATTTCACTTGAACCTGGTGGTCAATTCGAGCTTAGTGGTGCACCTCTTGAGACTCTGCACCAAACATGTGCTGAAGTCAATTCACACCTTTATCAGGTAAAAGCTGTCGCTGAGGAAATGGGGATTGGTTTCTTGGGAATCGGTTTCCAGCCTAAATGGCGTAGGGAGGATATACCCATCATGCCAAAGGGGAGATACGACATTATGAGAAACTACATGCCCAAAGTTGGTTCCCTTGGACTTGATATGATGCTTCGAACATGTACTGTTCAGGTTAATCTGGATTTT…	MKYDQIAELLNSIAERFEWEKVMEGDKIIGPKQGKQSISLEPGGQFELSGAPLETLHQTCAEVNSHLYQVKAVAEEMGIGFLGIGFQPKWRREDIPIMPKGRYDIMRNYMPKVGSLGLDMMLRTCTVQVNLDFSSEADMIRKFRASLALQPYVDYALDVPMYFAYRNKKYVDCTGMTFRQFLAGKLPCLPGELPTYNDWENHLTTIFPEVRLKRYLEMRGADGGPWRRLCALPAFWMYQPCFDTFCKLQVGLLYDEDVLQAILDLTADWTPAEREMLRNKVPVTGLKTPFRDGSLKHVAEDVLKLAKDGLERRGYKEAGFLNAVAEMVRTGVTPAENLLEMYNGEWGRSVDPVFQELLY
	BniB03g023450	ATGGTCAAGAAAGCGAAATGGCTGGAGAACGTAAAGAAGGCTTTTAGTCCAGATGTAAAGGTAATCATCAAGATTGTTATCTTTTTAGCACACTCTTGAGCTTTCATATACTGATGATGTATTGATGGTTTTCTTGTTGCAGAAGTTGAAACACCAATCGGTTGAGGAGAGTGTCATTTCTTACCCTGTGTTGGTTGCAAGATCCAGAAGTTCTCCTCCTCAGTTTGAGGTCAGAGTTGATGAGGTCCACTACCAACATAAGAAGAAGAAGAATCTGTCTCCTCCTCCTTCAGTAGAAGAAGATGCTATTGTAGATTCAACACCATCTTCTCCTGAGTTTGTTCCTCCACCAGCTGCACCTGATAGGTTTGCTGGGAAGTCAAAGGAAGATGCAGCTGC…	ATGGTCAAGAAAGCGAAATGGCTGGAGAACGTAAAGAAGGCTTTTAGTCCAGATGTAAAGAAGTTGAAACACCAATCGGTTGAGGAGAGTGTCATTTCTTACCCTGTGTTGGTTGCAAGATCCAGAAGTTCTCCTCCTCAGTTTGAGGTCAGAGTTGATGAGGTCCACTACCAACATAAGAAGAAGAAGAATCTGTCTCCTCCTCCTTCAGTAGAAGAAGATGCTATTGTAGATTCAACACCATCTTCTCCTGAGTTTGTTCCTCCACCAGCTGCACCTGATAGGTTTGCTGGGAAGTCAAAGGAAGATGCAGCTGCCATCTTCATCCAGTCCACATTCAGGGGATATTTGGCAAGACAAGAATCAACGAGGATGAGGAGGTTGGCCAGGCTTAAGATA…	MVKKAKWLENVKKAFSPDVKKLKHQSVEESVISYPVLVARSRSSPPQFEVRVDEVHYQHKKKKNLSPPPSVEEDAIVDSTPSSPEFVPPPAAPDRFAGKSKEDAAAIFIQSTFRGYLARQESTRMRRLARLKILMEGLVVKRLAANTFKSMQTLTRVHSQIQSRRIWMAEENHARLKQLLQKHAKEIRVSKNEGNWNFNNQSKEKVEAGLLNKYEVKMGRERALAYASTHQHLKSNMKPTMTMFMDPSNLTWGWSWFERCMADRSWESSEKEQSNTVKTSIKTTTNRNSHGGEAAKSSNRKKLSSSSTQPNTPSTSSSSTTRNPRKNKPTPPSVRPKTTDAIAKSSEKNRRNISARSSVSDDEGLASSTARRHNMVPTKPVDEIAKSSEKNRRQSTARS…
	BniB03g024880	ATGGCGTCCATGGCCGCCGTCCTCAACAAGACTCCTTTCCTCTCTCAGCCACTCACCAAACCCCCAGCCTCCGATCTCCCCACCGCCGCCGTCTCGTTCCCATCGAAACCTCGCCGCCGTCGCGGAGCCGTCCGCGCCGGGCTGATCGCTCCAGACGGCGGGAAGCTCGTGGAGCTCGTCGTGGACGAGCCGCGACGGCGGGAGAAGAAGCACGAGGCGGCGGAGCTGCCGCGCGTGGAGCTGACGGCGATAGACATGCAGTGGATGCACGTCTTGAGCGAAGGCTGGGCGAGCCCGCTGGGAGGGTTCATGAGAGAATCCGAGTTCCTCCAAACTCTTCATTTCAACTCGCTGCGTCTCGACGACGGATCGGTTGTTAACATGTCGGTGCCTATCGTC…	ATGGCGTCCATGGCCGCCGTCCTCAACAAGACTCCTTTCCTCTCTCAGCCACTCACCAAACCCCCAGCCTCCGATCTCCCCACCGCCGCCGTCTCGTTCCCATCGAAACCTCGCCGCCGTCGCGGAGCCGTCCGCGCCGGGCTGATCGCTCCAGACGGCGGGAAGCTCGTGGAGCTCGTCGTGGACGAGCCGCGACGGCGGGAGAAGAAGCACGAGGCGGCGGAGCTGCCGCGCGTGGAGCTGACGGCGATAGACATGCAGTGGATGCACGTCTTGAGCGAAGGCTGGGCGAGCCCGCTGGGAGGGTTCATGAGAGAATCCGAGTTCCTCCAAACTCTTCATTTCAACTCGCTGCGTCTCGACGACGGATCGGTTGTTAACATGTCGGTGCCTATCGTC…	MASMAAVLNKTPFLSQPLTKPPASDLPTAAVSFPSKPRRRRGAVRAGLIAPDGGKLVELVVDEPRRREKKHEAAELPRVELTAIDMQWMHVLSEGWASPLGGFMRESEFLQTLHFNSLRLDDGSVVNMSVPIVLAIDDEQKAGIGESKRVALVDSDGNPVAILTDIEIYKHPKEERIARTWGTTAPGLPYVELYVEEAITNAGNWLIGGDLEVLEPVKYNDGLDRFRLSPAELRKELEKRGADAVFAFQLRNPVHNGHALLMTDTRRRLLEMGYKNPILLLHPLGGYTKADDVPLSWRMKQHEKVLEDGVLDPETTVVSIFPSPMHYAGPTEVQWHAKARINAGANFYIVGRDPAGMGHPVEKRDLYDADHGKKVLSMAPGLERLNILPFKVAAYDKTQ…
	BniB03g028100	ATGGTGCGAACACCATGTTGCAAAGCTGAGTTAGGATTGAAGAAAGGAGCTTGGACTCCCGAGGAAGATAAGAAACTAGTCTCCTACGTTAACCGCCACGGTGAAGGTGGCTGGCGAACTCTCCCCGAAAAAGCTGGTATTTATTTTTATTTTTTTTTTATTTTTATCCCGCCATTTTTGAATATTCAATGTTTGGACTTTTTGGTATGAATTAATTTTTTAAATAAAATAATTCTTTAAATGGATTAGGACTCAAGAGATGTGGCAAAAGCTGCAGACTGAGATGGGCCAATTATCTAAGACCTGACATCAAAAGAGGAGAGTTCAATGAAGATGAAGAACGTTCTATCATCTCTCTTCACGCCCTTCACGGCAACAAGTTAGTCTCTCTCTCCCCAT…	ATGGTGCGAACACCATGTTGCAAAGCTGAGTTAGGATTGAAGAAAGGAGCTTGGACTCCCGAGGAAGATAAGAAACTAGTCTCCTACGTTAACCGCCACGGTGAAGGTGGCTGGCGAACTCTCCCCGAAAAAGCTGGACTCAAGAGATGTGGCAAAAGCTGCAGACTGAGATGGGCCAATTATCTAAGACCTGACATCAAAAGAGGAGAGTTCAATGAAGATGAAGAACGTTCTATCATCTCTCTTCACGCCCTTCACGGCAACAAATGGGCTGCAATAGCTCGTGGATTACCTGGAAGAACCGATAACGAAATCAAGAACTACTGGAACACTCATATAAAAAAACGTTTGATCAAGAAAGGTGTTGATCCCGTTACACACAAGAGCTTGATGTCCGGC…	MVRTPCCKAELGLKKGAWTPEEDKKLVSYVNRHGEGGWRTLPEKAGLKRCGKSCRLRWANYLRPDIKRGEFNEDEERSIISLHALHGNKWAAIARGLPGRTDNEIKNYWNTHIKKRLIKKGVDPVTHKSLMSGTGISENLPERNKTSITSDDDIDHNEKVKKSELSSARFLNRVANRFGKRINQSVLSEIIGSGGGPLTTITSHTTTTSVTVDSESDKSSNSSFTPTSNLLITVNGKGNATSSPSTFSDSSVNDHLMYCDNNEDNIGFSTFLNDEDFMMLEESCVENTEFMKELTRFLQEDETDNVEMMPVYEHQDSFEEIDNYFA-
	BniB03g031270	ATGGCTCAGAACGATACAGTGAAGTTGATAGGTTCTTGGGCGAGCCCTTTTTCCATTAGGGTTCGAGCGGCTCTACACTTGAAATCTGTCAAGTATGAGTACTTGGACGAACCTGATGTTCTCAGGTCAAAGAGTGAACTCCTTCTCAAGTCCAACCCAATCTTCAAGAAAGTCCCTGTTCTCATCAACGGTGATGTTTCCATCTGTGAGTCACTCAACATCGTTCAGTACATTGATGAAGCTTGGTCCTCTGGTCCTTCCATCCTTCCTTCTCATCCGCAGGAACGTGCCAACGCTCGATTCTGGGCTATCTTCATCGACGAAAAGGTAAAACAACTAGATTAAGCTCCATGGATCTCTTAGTGGATTAATCTTACACATGCTCTGTTTTCCTTGCCG…	ATGGCTCAGAACGATACAGTGAAGTTGATAGGTTCTTGGGCGAGCCCTTTTTCCATTAGGGTTCGAGCGGCTCTACACTTGAAATCTGTCAAGTATGAGTACTTGGACGAACCTGATGTTCTCAGGTCAAAGAGTGAACTCCTTCTCAAGTCCAACCCAATCTTCAAGAAAGTCCCTGTTCTCATCAACGGTGATGTTTCCATCTGTGAGTCACTCAACATCGTTCAGTACATTGATGAAGCTTGGTCCTCTGGTCCTTCCATCCTTCCTTCTCATCCGCAGGAACGTGCCAACGCTCGATTCTGGGCTATCTTCATCGACGAAAAGGTCTTTGGATCGTTACAAGCGATGGGCGAAGCAAAAGACGACGAAGGGAGAATGGCGGCGGCTGAACAGCTG…	MAQNDTVKLIGSWASPFSIRVRAALHLKSVKYEYLDEPDVLRSKSELLLKSNPIFKKVPVLINGDVSICESLNIVQYIDEAWSSGPSILPSHPQERANARFWAIFIDEKVFGSLQAMGEAKDDEGRMAAAEQLMENLATLEEAFQKTSKGLGFFGGENIGFLDLACGTLLGPVSVIEAFSGVKFLRQETTPGLIEWGEKFRAHEAVKPYMPTPEEFIAFAKKKFNVE-
	BniB03g035750	ATGACCGAGCCGACGATGAATCTCTGGACCACCGACGATAACGCCTCTATGATGGAAGCTTTCATGAGCTCCTCCTCCGACATCTCAGCCATATGGCCACCGGCAACGGCAACGGCGTCGACTACAGCTCCGGCACAGGCGGGATTTAACGAGGAGACTCTCCAGCAAAGGCTACAAGCACTGATTGAAGGGACAAACGAAGGGTGGACCTACGCTATATTCTGGCAGCCGTCGTACGACTTCTCCGGCGCCTCCGTGCTCGGATGGGGCGATGGCTACTACAAAGGAGAAGAAGACAAGGGAAAGCCCAGACAGAGATCGATTCCACCGCCGTTTTCGACTCCGGCGGATCAGGAGTATCGTAAGAAGGTGTTGCGTGAGCTCAACTCGTTGATCTCC…	ATGACCGAGCCGACGATGAATCTCTGGACCACCGACGATAACGCCTCTATGATGGAAGCTTTCATGAGCTCCTCCTCCGACATCTCAGCCATATGGCCACCGGCAACGGCAACGGCGTCGACTACAGCTCCGGCACAGGCGGGATTTAACGAGGAGACTCTCCAGCAAAGGCTACAAGCACTGATTGAAGGGACAAACGAAGGGTGGACCTACGCTATATTCTGGCAGCCGTCGTACGACTTCTCCGGCGCCTCCGTGCTCGGATGGGGCGATGGCTACTACAAAGGAGAAGAAGACAAGGGAAAGCCCAGACAGAGATCGATTCCACCGCCGTTTTCGACTCCGGCGGATCAGGAGTATCGTAAGAAGGTGTTGCGTGAGCTCAACTCGTTGATCTCC…	MTEPTMNLWTTDDNASMMEAFMSSSSDISAIWPPATATASTTAPAQAGFNEETLQQRLQALIEGTNEGWTYAIFWQPSYDFSGASVLGWGDGYYKGEEDKGKPRQRSIPPPFSTPADQEYRKKVLRELNSLISGGGGPTDDAVDEEVTDTEWFFLVSMTQSFACGSGLAGKAFSTGNAVWVSGPDQLTGSGCERAKQGGVFGMQTIACIPSPNGVVELGSTEQIRQSSDLMNKVRVLFNFNGGAGDLSGLNWNLDPDQGENDPSMWINDPIGVPEQVNGAPSSSSQLFAKSVQFENGGSSSTVTENPNPDPTPSPVSQAQNPKFSNNFSRELNFSTSSTTLVKPRTGEILSFGDEGKRSSVNPDPSSYSGQTQFENKRKKSVGLSDDKVLTFGTGGGES…
	BniB03g038560-1	ATGTCTATCAGAAACACATGTCCTCCAACGGCAATAGAAACCATAACCGACACTACCGTGCCAAACCATGACGAGACCGGGAAAGAGGCAACAGAGTTCGAGAAGAATCAGAAACGGTACCAAGACCTGATCTCCACGTTGCCTCACGTGAAAAGATGGAGGCCGAAAGATCCACTGATTGAGTACGGTGATCATTGGTTGATACAGCCGATCGTTGAAGGTTCGCTTTACGCGCAAGAGTTTTTCCAAGCACGACCCAGTGACTTCTTCATTTGTAGCTACCTAAAGACAGGTACCACTTGGCTCAAATCACTAACATTCGTAATAGCCAACCGATCTCGCTTTGATGATTCCACGAACCCTCTCCTAAAACGTAACCCTCACGAGCTTATTCCTTTC…	ATGTCTATCAGAAACACATGTCCTCCAACGGCAATAGAAACCATAACCGACACTACCGTGCCAAACCATGACGAGACCGGGAAAGAGGCAACAGAGTTCGAGAAGAATCAGAAACGGTACCAAGACCTGATCTCCACGTTGCCTCACGTGAAAAGATGGAGGCCGAAAGATCCACTGATTGAGTACGGTGATCATTGGTTGATACAGCCGATCGTTGAAGGTTCGCTTTACGCGCAAGAGTTTTTCCAAGCACGACCCAGTGACTTCTTCATTTGTAGCTACCTAAAGACAGGTACCACTTGGCTCAAATCACTAACATTCGTAATAGCCAACCGATCTCGCTTTGATGATTCCACGAACCCTCTCCTAAAACGTAACCCTCACGAGCTTATTCCTTTC…	MSIRNTCPPTAIETITDTTVPNHDETGKEATEFEKNQKRYQDLISTLPHVKRWRPKDPLIEYGDHWLIQPIVEGSLYAQEFFQARPSDFFICSYLKTGTTWLKSLTFVIANRSRFDDSTNPLLKRNPHELIPFIEIEFPLFPQVDGLKDKGNTLFSTHMPYKSLPESVVKMGCKMVYIWRDPKDTFISLWHFFQKKRSESGPLNGLEESFDMFCKGFSAYGPYLDHVLGYWKAHQENPDQILFLKYETLSVDPLPHVKRLAEFMGYGFTAEEEKSGVVEKVVNLCSFETLKNLEANKGDKEREDHPSPFTKSAYFRKGKTGDWENYLTLEMAARMDGIMEDKFKDTGLLENGK
	BniB03g038560-2	ATGTCCTCCAATCCTTTTCCTCTAATGGCAACAGAAACCGTAAGCGACACTACCGTGCCGAACCATGACAACACCGAGACAGAGCCAACTGGGTTCAAGAAGAATCAGAAACGGTACAAAGACCTGATCTCCACGCTTCCTCACGTGGAAGGCTGGAGGCCGAACGCTCCCTTTATCAGGTACGGTGGTCACTGGTGGATACAGGATATCCTTGAAGGTTCTCTTTACGCACGAGAGTTCTTCCAAGCTCGACCTAGTGACTTCCTCGTTTGTAGCCACCCGAAGACAGGTACCACCTGGCTTAAATCACTAACATTCGCAATAGCCAATCGATCTCGCTTCGAAGATTCCACAAACCCTCTCCTGAAATGTAACCCTCACGAGCTTATTCCTTTCATT…	ATGTCCTCCAATCCTTTTCCTCTAATGGCAACAGAAACCGTAAGCGACACTACCGTGCCGAACCATGACAACACCGAGACAGAGCCAACTGGGTTCAAGAAGAATCAGAAACGGTACAAAGACCTGATCTCCACGCTTCCTCACGTGGAAGGCTGGAGGCCGAACGCTCCCTTTATCAGGTACGGTGGTCACTGGTGGATACAGGATATCCTTGAAGGTTCTCTTTACGCACGAGAGTTCTTCCAAGCTCGACCTAGTGACTTCCTCGTTTGTAGCCACCCGAAGACAGGTACCACCTGGCTTAAATCACTAACATTCGCAATAGCCAATCGATCTCGCTTCGAAGATTCCACAAACCCTCTCCTGAAATGTAACCCTCACGAGCTTATTCCTTTCATT…	MSSNPFPLMATETVSDTTVPNHDNTETEPTGFKKNQKRYKDLISTLPHVEGWRPNAPFIRYGGHWWIQDILEGSLYAREFFQARPSDFLVCSHPKTGTTWLKSLTFAIANRSRFEDSTNPLLKCNPHELIPFIEIQFPLFPHIDVLQDKGNTLFATHMPHDFLPESVVKSGCKMVYIWRDPKDTFISLWHFSQNRRLESGVLNGLEESFDKFCKGLSVYGPYLDHVLGYWKAHQENPDQLLFLKYETLSVDPLPHVKRLAEFMGYGFTAEEEKSGVVEKVVNLCSFETLKNLEANKGDKERQDHPSRYVNSVYFRKGKTGDWENYLTPDMAARMDRITENKFKGTGLLENGK
	BniB03g038630	ATGGCTACAGAAGCTGTAACCGACACTACCGTGCCAAACCATGACAAGACCGAGAAAGAGGCAACAGAGTTCGAGAAGAATAAGAAACGGTACCAAGACCTGATCTCCACGTTGCCCCACGTGAAAGGATGGAGGCCGAAATCTCCCTTGATTGAGTATGGTGCTCACTTACATCCTATCCCGAAGGCTCCCTTTACGCGCAAGACTTCTTCCAAGCGCGACGCAGTGACTTCCTCATTTGTAGCTACCCAAAGACAGGTTCTACTTGGCTCAAGTCACTAATATTCACAATAGCCAATCGATCTCGCTTCGACAACTCCACGAACCCTCTCCTAAAACATAACCCTCACGAGCTTATTCCTTTCATTGAGATCGAGTTCCCTTATTTCCCTAACATTG…	ATGGCTACAGAAGCTGTAACCGACACTACCGTGCCAAACCATGACAAGACCGAGAAAGAGGCAACAGAGTTCGAGAAGAATAAGAAACGGTACCAAGACCTGATCTCCACGTTGCCCCACGTGAAAGGATGGAGGCCGAAATCTCCCTTGATTGAGTATGGTGCTCACTTACATCCTATCCCGAAGGCTCCCTTTACGCGCAAGACTTCTTCCAAGCGCGACGCAGTGACTTCCTCATTTGTAGCTACCCAAAGACAGATCGAGTTCCCTTATTTCCCTAACATTGATGTTTTCCAAGACAAAGGGAACACTCTGTTTGCAACTCATATGCCACACGATTTCTTACCCGATTCGGTTGTGAAGTCGGGTTGTAAGATGGTTTACATCTGGAGAGACCCA…	MATEAVTDTTVPNHDKTEKEATEFEKNKKRYQDLISTLPHVKGWRPKSPLIEYGAHLHPIPKAPFTRKTSSKRDAVTSSFVATQRQIEFPYFPNIDVFQDKGNTLFATHMPHDFLPDSVVKSGCKMVYIWRDPKDTFISLWHFFQKKRSENGPLNSFEESFDIFCKGVSAYGPYLDHVLAYWKAHQDNPDKILFLKYETVRADPLPYAMRLAEFMGYGFTAEEEKSGVVEKVVNLCSFETMKNLEVNKGDKEREDHPSPYVNSAFFRKAKTGDWENYLTPDVAARMDGIMEEKFKGTGLLENDLRPFRVHIEREINAVNHWQMATTYHSRSLGTVDYIWHTKDILMFLTCSVFSTSFTDYDSCFEFT-
	BniB03g038740	ATGGGCGGGGGCGATCTCCCTTTGTCCGTAGCAGACATCAGGTGAGGGGTCATTGGATTCAGTTTCATTGATTTGCTTTCAAATTTCTTCTTTCATGCTCTTTTCTTATATTGGGGATGAAAAAGTTTTGAACTTTCAAAGGGACCCTTTGATCTTTGTTTATGTCTGCTTAAGGTTAAAGCTTGTTTCTTTATTGATGGGCTAGGATGGAGAATGAGCCTGATGACGATAATGTAGCGGAGATTGACGTGAGTGATGAAGAGATTGATGCCGAAGACCTTGAGAGACGCATGTGGAAGGATCGTGTACGTCTCAAAAGAATCAAAGAACGAACTAAACAGGGCACTTCTCAAACGAAGGAGACGCCAACGAAAGTCTCTGAACAAGCGCAGAGGAAGA…	ATGGGCGGGGGCGATCTCCCTTTGTCCGTAGCAGACATCAGGATGGAGAATGAGCCTGATGACGATAATGTAGCGGAGATTGACGTGAGTGATGAAGAGATTGATGCCGAAGACCTTGAGAGACGCATGTGGAAGGATCGTGTACGTCTCAAAAGAATCAAAGAACGAACTAAACAGGGCACTTCTCAAACGAAGGAGACGCCAACGAAAGTCTCTGAACAAGCGCAGAGGAAGAAGATGTCTAGAGCTCAAGACGGTATACTCAAGTACATGTTGAAGCTCATGGAAGTCTGCAAAGTCCGCGGCTTCGTCTACGGTATCATACCCGAAAAGGGAAAGCCAGTGAGCGGCTCCTCTGACAATATAAGAGCTTGGTGGAAGGAGAAAGTGAAGTTTGAT…	MGGGDLPLSVADIRMENEPDDDNVAEIDVSDEEIDAEDLERRMWKDRVRLKRIKERTKQGTSQTKETPTKVSEQAQRKKMSRAQDGILKYMLKLMEVCKVRGFVYGIIPEKGKPVSGSSDNIRAWWKEKVKFDKNGPAAIGKYEEECLAFGKSDGNRNSQFVLQDLQDATLGSLLSSLMQHCDPPQRKYPLEKGTPPPWWPSGDEEWWVKLGLPKSQSPPPYKKPHDLKKMWKVGVLTAVINHMSPDIAKIKRHVRQSKCLQDKMTAKESAIWLAVLNQEESLLSQPSGDNGASDVTETHRRGNNADRRKTVINSDSDYDVDGMEEATGSVSSKDNRRKQTQKEQPTATSQPVKDQDKAEKHQRRKRPRRTVDRQEEEQPEAEQRNILPDMNHVDAPML…
	BniB03g041020	ATGTGTTACTTCATCCTTCTGCCTCTCCTTATACTCACCTTGGTTTATAAATTACTCTTCTCCAAAACGCAGCGTTTTAATCTCCCGCCAGGACCACCGTCCCGTCCCATCCTCGGCCATCTCCACCTCATGAAACCACCGGTCCACCGCCTCCTCCAACGCTTCTCCGACAAATACGGCCCAATATTCTCCCTCCGTTACGGCTCCAGCCGCGTCGTGGTGATCACCTCACCTTCACTCGTACAAGAATCCTTCACCGGGACAAACGACGTCGTCCTCTCTAGCCGGCCGCTCCAGCTCACCGCTAAATACGTCGGCTACAACCACACGACCGTCGGTACCGCTCCTTACGGCGACCACTGGCGTAACCTCCGCCGCATCTGCTCCCTCGAGATCCTC…	ATGTGTTACTTCATCCTTCTGCCTCTCCTTATACTCACCTTGGTTTATAAATTACTCTTCTCCAAAACGCAGCGTTTTAATCTCCCGCCAGGACCACCGTCCCGTCCCATCCTCGGCCATCTCCACCTCATGAAACCACCGGTCCACCGCCTCCTCCAACGCTTCTCCGACAAATACGGCCCAATATTCTCCCTCCGTTACGGCTCCAGCCGCGTCGTGGTGATCACCTCACCTTCACTCGTACAAGAATCCTTCACCGGGACAAACGACGTCGTCCTCTCTAGCCGGCCGCTCCAGCTCACCGCTAAATACGTCGGCTACAACCACACGACCGTCGGTACCGCTCCTTACGGCGACCACTGGCGTAACCTCCGCCGCATCTGCTCCCTCGAGATCCTC…	MCYFILLPLLILTLVYKLLFSKTQRFNLPPGPPSRPILGHLHLMKPPVHRLLQRFSDKYGPIFSLRYGSSRVVVITSPSLVQESFTGTNDVVLSSRPLQLTAKYVGYNHTTVGTAPYGDHWRNLRRICSLEILSSNRLTSFLYIRKDEIRRMLTRLSRGSHGSRFTHVALEPLLSDLTFNNIVRMVTGKRYYGDDVDNKEEAEVFKKLVHDISMYSSANNWRDYLPVLKLFGNKFEKEVMAAGKSMDEFLQRLLDDCRRDRDGNTMVTHLLSLQQQEPDYYSDVTIKGLMMAMMLAGTETSAITLEWAMTNLLKHPQVLEKARLEIDEKIGEDRLIDEPDLADLPYLQNVVSETFRLFPVAPLLVPRTPTKDMKIGGYDVPRNTIVLVNAWAIHRDPKL…
	BniB03g043330	ATGGACAATCTGGCGTTATGTGAAGCAAACAACGCTCCTTTAACGCCCATAACGTTCTTGAAGAGAGCTTCGGAATGTTATCCAACTAGAACTTCCATCATATATGGAGAAACTCGTTTCACTTGGCCTCAGACCTATGCCCGTTGCTGTCGTCTCGCTGCTTCTCTCCTGTCTCTTAACATCGCCAAGAATGATATCGTATGTCACTCTCTCTCTCTTTCTCTCTCCAACAAATCTTTTTGTTTTGTTTAAAGTGAATAGTAGGTGTTAGTGTTAGAAAACAAATCTGAATATAAAAAATAATTATATTCATTTTAACTTGGATATGAGACGTGACATAAATATGTATTTAGGACTTTAGGTATCAGTTCTGGCCCCAAACATACCGGCCATATATGA…	ATGGACAATCTGGCGTTATGTGAAGCAAACAACGCTCCTTTAACGCCCATAACGTTCTTGAAGAGAGCTTCGGAATGTTATCCAACTAGAACTTCCATCATATATGGAGAAACTCGTTTCACTTGGCCTCAGACCTATGCCCGTTGCTGTCGTCTCGCTGCTTCTCTCCTGTCTCTTAACATCGCCAAGAATGATATCGTATCAGTTCTGGCCCCAAACATACCGGCCATATATGAGATGCACTTCGCTGTTCCCATGGCAGGAGCTGTCCTTAACCCTATCAACACCCGCCTCGACGCAAAATCCATCGCCGCAATCTTCCGCCACGCACAGCCCAAGATATTATTCGTAGACCGCAATCTTGAGACCTTAGCTAGAGCCACGCTCCATCTACTACAA…	MDNLALCEANNAPLTPITFLKRASECYPTRTSIIYGETRFTWPQTYARCCRLAASLLSLNIAKNDIVSVLAPNIPAIYEMHFAVPMAGAVLNPINTRLDAKSIAAIFRHAQPKILFVDRNLETLARATLHLLQDKEHLNLLVIYIDEPDCPKRVSSNELDYEGLIRTGEPSSSLVAAMFRIQNEQDPISLNYTSGTTSEPKGVVVSHRGVYLSSLSVIMGWEMGTFPVYLWTLPMFHCNGWNLTWSVAARGGTNVCIRHVSAPEIYKNIELHGVTHMCCVPTVFNILLQGNPVDMSQRSRPVQVLTGGSSPPAALVEKVQRLGFQVLHVYGLTEATGAVLFCEWHDEWNRLPEKQQMEMKARQGVGILALADVDVKNTKTQESVPRDGKTMGEIVMKGS…
	BniB03g052120	ATGGGCAGGGACGATCTAGCTATGTCCGTAGCAGATATCAGGTGAGGAACATTGGATTCAGTTTCATTCGGTTTTCTTTTCGAGTTTCTCATATTCATGCTGTTGGATTTAGGGTTTAATGTTTTATGCTCCTTTTCTTGTATCGACGTGGATTCGAACTCATGACTTGATTCACAAAAAGTTTCCAACTTTCAATACGCAGAGATGACTTAACATGAATCACTGCTCTCTGAAGGTGTTGGAATCGTATGAAAGAGTTAGCCTTTACGTTTAATTTCAATTGAAATTGATGAATCAATGAAAAACTGAGTATCCCAGATTGGTTTTTCATCTAAATTGTGTTACTTTTTAGCAGCAAAGGTGGAGCCTTTGATCCGTTGTTTATGTTTATTGATTGGC…	ATGGGCAGGGACGATCTAGCTATGTCCGTAGCAGATATCAGGATGGAGAATGAGCAGCCTGATGACTTAGCTAGCGATAACGTCGCTGAGATCGATGTGAGTGATGAAGAGATTGATGCAGAAGACTTAGAGAGACGTATGTGGAAGGACCGTGTCAGGCTCAAAAGAATCAAAGAGCGTCAAAAAGGAGATTCTCAGGGAGCTCAGGCGGCGAAGGAGGCTCCCAAGAAGATCTCTGACCAAGCGCAGAGGAAGAAGATGTCTAGAGCACAAGACGGTATACTCAAGTACATGCTGAAGCTGATGGAAGTCTGCAAAGTCCGCGGGTTTGTGTACGGTATCATACCTGAGAAGGGGAAGCCAGTGAGCGGCTCCTCTGACAATATAAGAGCTTGGTGG…	MGRDDLAMSVADIRMENEQPDDLASDNVAEIDVSDEEIDAEDLERRMWKDRVRLKRIKERQKGDSQGAQAAKEAPKKISDQAQRKKMSRAQDGILKYMLKLMEVCKVRGFVYGIIPEKGKPVSGSSDNIRAWWKEKVKFDKNGPAAIAKYEEECLAFGKSDGNRNSQFVLQDLQDATLGSLLSSLMQHCDPPQRKYPLEKGTPPPWWPTGKEEWWVKLGLPQNQSPPYRKPHDLKKMWKVGVLTAVISHMSPDIAKIKRHVRQSKCLQDKMTAKESAIWLAVLNQEESLIQQPSSDNGTSNVTETHRRGNNADRRKTVINSDSDYDVDGTEEASGSVSSKDSRRNQVQKEQPTGTSQPVRDQDKAEKHRRRKRPRIRSGTVNVQDEEQPEAEQRNVLPD…
	BniB03g052520	ATGGTACGGACACCGTGTTGCAGAGCAGAAGGGTTGAAGAAAGGAGCATGGACTCAAGAAGAAGACCAAAAGCTTATTGCCTACGTTCAACATCACGGTGAAGGAGGCTGGCGAACCCTTCCCGATAAAGCTGGTATGCCTTGTTTTTTTCTTTCTCAAAATCAAATTATTAATTCCGCCAGTTTGGAAGTAGCTTTTCTTTGCATTATACTGTTTTATTGATATTTAATGGTTTTCAATCATAACAACATTATAGGACTCAAAAGATGTGGCAAAAGCTGCAGATTGAGATGGGCCAATTACCTTAGACCAGACATTAAGCGTGGTGAGTTTAGCGAAGAGGAGGAAGATTCCATCATTAATCTCCACGCCATTCATGGCAACAAGTAAGTTTTTAAT…	ATGGTACGGACACCGTGTTGCAGAGCAGAAGGGTTGAAGAAAGGAGCATGGACTCAAGAAGAAGACCAAAAGCTTATTGCCTACGTTCAACATCACGGTGAAGGAGGCTGGCGAACCCTTCCCGATAAAGCTGGACTCAAAAGATGTGGCAAAAGCTGCAGATTGAGATGGGCCAATTACCTTAGACCAGACATTAAGCGTGGTGAGTTTAGCGAAGAGGAGGAAGATTCCATCATTAATCTCCACGCCATTCATGGCAACAAATGGTCGGCCATAGCTCGTAGATTACCAGGAAGAACAGACAACGAGATCAAGAACCATTGGAACACTCACGTCAAGAAACGTCTTATCAAGAAAGGTATCGATCCGTTGACCCACAAATCACTTGATGGTAAATCA…	MVRTPCCRAEGLKKGAWTQEEDQKLIAYVQHHGEGGWRTLPDKAGLKRCGKSCRLRWANYLRPDIKRGEFSEEEEDSIINLHAIHGNKWSAIARRLPGRTDNEIKNHWNTHVKKRLIKKGIDPLTHKSLDGKSSDHPETLPDKSSVHQEDDDHNSNNNKSLGSSSARFLNRVANKFGKRINHSALSDIIGSGGPFTSHTTPTTSASECEKSTSSSSTPNSSNLHMILDATTTPTTSASTFSNDASAPLLYDNIFDDIEDMTGFSSRYLNDIVSHDGEDFLMLDGSCSENTLLFMKELTMILREDKTETTSFNGSHVTPIDEVDDYSFEGIDNWFG-
	BniB03g052540	ATGGAATCAGAACCCTTAAACGACACGACCGTACCGAACCAGAGCAAGACCGAGACAGAGTCATCAGAGTTCGAGAAGAATCAAGAACGGTACCAAGCACTAATCTCCACGTTCACGCACGAGAAAGGCTGGAGACCAAAAGAGCCCTTCATCGAGTACGGTGGTCACTGGTGGGTACAACCTCTCCTCGAAGGCTGCCTTCACGCCCAAGAGTTCTTCCAAGCGCGACCCAACGACATCTTCGTCTGTAGCTACCCGAAGACAGGAACCACGTGGCTCAAAGCCTTGACATTCGCCATAGCTTTTTAGCAAAAAGACATTCGCCATAGCCAATAGGTCCCGCTTCGACGATTCCTCGAACCCTCTCCTTAAACGTAACCCTCACGAGTTTGTTCCTTA…	ATGGAATCAGAACCCTTAAACGACACGACCGTACCGAACCAGAGCAAGACCGAGACAGAGTCATCAGAGTTCGAGAAGAATCAAGAACGGTACCAAGCACTAATCTCCACGTTCACGCACGAGAAAGGCTGGAGACCAAAAGAGCCCTTCATCGAGTACGGTGGTCACTGGTGGGTACAACCTCTCCTCGAAGGCTGCCTTCACGCCCAAGAGTTCTTCCAAGCGCGACCCAACGACATCTTCCTTTTTAGCAAAAAGACATTCGCCATAGCCAATAGGTCCCGCTTCGACGATTCCTCGAACCCTCTCCTTAAACGTAACCCTCACGAGTTTGTTCCTTACATCGAGATCGACTTCCCTTTCTTCCCTCAAGTCGATGTTCTCAACGACAAAGGTAAC…	MESEPLNDTTVPNQSKTETESSEFEKNQERYQALISTFTHEKGWRPKEPFIEYGGHWWVQPLLEGCLHAQEFFQARPNDIFLFSKKTFAIANRSRFDDSSNPLLKRNPHEFVPYIEIDFPFFPQVDVLNDKGNTLFSTHIPYESLPGSVVKSGCKLVYIWRDPKDTFISLWTFLHKERSELGPVNNLEESFDMFCRGLSGYGPYLDHVLGYWKAYQENPDKILFLKYESMRADPLPYVKKLAEFMGYGFTAEEEEKGVAEKVVDLCSFETLKNLEANKGEKEREDRAAVYANSAYFRKGKVGDWSNYLTPEMAARIDGVMAEKFKDTGLLEHGT
	BniB03g052550	ATGGAATCAGAACCCTTAACCGCGACGACGGTACAGAACCAGGAGGAGACCAAGACAGAGTCATCAGAGTTCGAAAAGAATCGAGAACGGTACCAAGCTCTAATCTCCACGTTTACTCACGAGAAAGGCTGGAGGCAGAAAGAAGCCTATATCGAGTACGGTGGTCACTGGTGGACACAACCTCACCTCGAAGGTTGTCTTCACGCGCAAGAGTTCTTCCAAGCACGACCCAACGATTTCTTCGTCTGTAGCTACCCAAAGACAGGTACCACTTGGCTCAAAGCGCTCACTTTCGCCATTGCCAATAGATCCCGCTTCGACCATTCATCGAACCCTCTCCTCAAACGTAACCCTCACGAGCTTGTTCCTTACATCGAGTTCAAACTCCCTTTCTTCCCT…	ATGGAATCAGAACCCTTAACCGCGACGACGGTACAGAACCAGGAGGAGACCAAGACAGAGTCATCAGAGTTCGAAAAGAATCGAGAACGGTACCAAGCTCTAATCTCCACGTTTACTCACGAGAAAGGCTGGAGGCAGAAAGAAGCCTATATCGAGTACGGTGGTCACTGGTGGACACAACCTCACCTCGAAGGTTGTCTTCACGCGCAAGAGTTCTTCCAAGCACGACCCAACGATTTCTTCGTCTGTAGCTACCCAAAGACAGGTACCACTTGGCTCAAAGCGCTCACTTTCGCCATTGCCAATAGATCCCGCTTCGACCATTCATCGAACCCTCTCCTCAAACGTAACCCTCACGAGCTTGTTCCTTACATCGAGTTCAAACTCCCTTTCTTCCCT…	MESEPLTATTVQNQEETKTESSEFEKNRERYQALISTFTHEKGWRQKEAYIEYGGHWWTQPHLEGCLHAQEFFQARPNDFFVCSYPKTGTTWLKALTFAIANRSRFDHSSNPLLKRNPHELVPYIEFKLPFFPQLDSLPDSVVRSGCKLVYIWRDPKDTFISLWIFLHKARKELGPVNNLEESFDMFCRGLSSYGPYFDHVLGYQENPDKILFLKYEFMRSDPLPYVKELAEFMGFGFTVEEEEKGIAENVVKLCSFESLKNLEANKGEKEMTVFVNSAFFRKGKVGDWSNYLTPDMAARIDGIMEEKFKDTGLLENGK
	BniB03g052560	ATGGAATCCAACACGACCCAGAACGGATCCCAAGTCGAGCTCTCAGAGTTCGAGAAGACCCAGAAGAAGTACCAAGACTTCATCGCTGCCCTCCCGAAGAGCAAAGGATGGAGACCAAGCGAGATCCTAACCCAACACGGAGGACACTGGTGGCAAGAATGTCTCCTCGAGGGTCTACTCCACGCCAAAGACCATTTCCAAGCACGACCCACCGACTTCCTCGTCTGCAGCTACCCAAAAACAGGCACGACCTGGCTCAAAGCCTTGACTTACGCCATCGTAAACCGATCTCGTTTCGACGACGCCACGAACCCGCTCCTCAAACGTAACCCTCACGAGTTCGTGCCTTACGTCGAGATAGACTTCGCGTTTTACCCGACCGTGGACGTCCTCCAAGAC…	ATGGAATCCAACACGACCCAGAACGGATCCCAAGTCGAGCTCTCAGAGTTCGAGAAGACCCAGAAGAAGTACCAAGACTTCATCGCTGCCCTCCCGAAGAGCAAAGGATGGAGACCAAGCGAGATCCTAACCCAACACGGAGGACACTGGTGGCAAGAATGTCTCCTCGAGGGTCTACTCCACGCCAAAGACCATTTCCAAGCACGACCCACCGACTTCCTCGTCTGCAGCTACCCAAAAACAGGCACGACCTGGCTCAAAGCCTTGACTTACGCCATCGTAAACCGATCTCGTTTCGACGACGCCACGAACCCGCTCCTCAAACGTAACCCTCACGAGTTCGTGCCTTACGTCGAGATAGACTTCGCGTTTTACCCGACCGTGGACGTCCTCCAAGAC…	MESNTTQNGSQVELSEFEKTQKKYQDFIAALPKSKGWRPSEILTQHGGHWWQECLLEGLLHAKDHFQARPTDFLVCSYPKTGTTWLKALTYAIVNRSRFDDATNPLLKRNPHEFVPYVEIDFAFYPTVDVLQDGKNPLYSTHIPNGSLPESIVKSGCKMVYIWRDPKDTFISMWTFLHKEKSQEGQLASLEEAFDMFCKGLSVYGPYLDHVLGYWKAYQENPDRILFLRYETMRANPLPFVKRLAEFMGYGFSAEEEERGVAEDVVKLCSFETLKNLEANKGDKEREDRPAVYANSAYFRKGKVGDWANYLTPEMAARIDGLVEETFKDTGLLQHDQ-
	BniB03g055850	ATGGGATACATTTTAGACCCTAAAAGCATGAATGAGATTAATGGAGATGATGAAACCGAGCTTGGTTTGAGGGCAGTGAGGCTAGCTAATTACATTACCTTCCCCATGGTTTTCAAAACCGCCATTGAGCTTGGCGTCATCGACGCTCTCTACCTGGCTGCTCGTGCTGATGTCAATGGATCAGGTTCGTTCCTCAAACCGTCTGAGATCGCTACTCGGCTTCCCACACAGCCTAGTAACCCTGAAGCACCGGTTTTGTTGGACCGTATGCTTCGCTTACTCGCTAGTTACTCAATGGTTAAGTGCCAGATAGTAGACGGTGAGAGGGTGTACAAAGCTGAGCCCATTTGTAAGTATTTCTTGAGATATAATATTGAAGAGACGGGGACACTTGCTTCT…	ATGGGATACATTTTAGACCCTAAAAGCATGAATGAGATTAATGGAGATGATGAAACCGAGCTTGGTTTGAGGGCAGTGAGGCTAGCTAATTACATTACCTTCCCCATGGTTTTCAAAACCGCCATTGAGCTTGGCGTCATCGACGCTCTCTACCTGGCTGCTCGTGCTGATGTCAATGGATCAGGTTCGTTCCTCAAACCGTCTGAGATCGCTACTCGGCTTCCCACACAGCCTAGTAACCCTGAAGCACCGGTTTTGTTGGACCGTATGCTTCGCTTACTCGCTAGTTACTCAATGGTTAAGTGCCAGATAGTAGACGGTGAGAGGGTGTACAAAGCTGAGCCCATTTGTAAGTATTTCTTGAGATATAATATTGAAGAGACGGGGACACTTGCTTCT…	MGYILDPKSMNEINGDDETELGLRAVRLANYITFPMVFKTAIELGVIDALYLAARADVNGSGSFLKPSEIATRLPTQPSNPEAPVLLDRMLRLLASYSMVKCQIVDGERVYKAEPICKYFLRYNIEETGTLASQFILELDSVFLNTWAQLKDVVLEGGDAFARANGGLKLFDYMGTDERLSKLFNRTGFSVGVLKKFLEVYKGFEGVNVLVDVGGGVGNTLGFVTSKYPNIKGINFDLTCALAQAPSYPNVEHVAGDMFVEIPRGDAIILKRMLHDWNDEDCAKILKNCWKALPENGKVIIMELVIPDEAESIDVQSNIAFDMDLLMLTQLSGGKERTKAEYEAMAAHSGFASCNFVCPAYHLWVIEFSK-
	BniB03g057270	ATGGCTGTTCTGGTCAACGGTCTCTCCTTATGGCAAAAAGTAAACGAGATTATTGAATTAAGATTGTTTGCGTTATGCGCATAAAATATGCCACAAAACCATTGACTTGGTTTGTTTTAACTTAAATGATAGAGACAAATACACAATTTGCAATATATTTAGACTTTTTGCATGCACTTAGTCTCTTACCTATCCAGATTCATCAATCTATTTATGACACTCTCCTCTCACAATTAATTAAAATCAATCTCCTACATTTTTCATTATAAATAAGCTTCATCTATGTTGCTACAACATCACACTTTAAGTCACATACAAACCATATATCCAGCTATCTATTCTATCTCCTGCTCCTGGTTCGATTATGTTCCTATTTTTTAAACCAAACCTCATACATTG…	ATGGCTGTTCTGGTCAACGGTCTCTCCTTATGGCAAAAAATAATAACTATGGCCTCGAGAGCCCACCCTGTGGACGGTGATTTAAGTCCGGCAACGGACGGTGGAGATCTTCCGATCAAATCGTCGCCTCACCGGCATAAAGTTGGGATCCCACCGAAGCAAAACATGTTCCATGACTTCATGTACACGTTCAAAGAAACTTTCTTCCATGATGATCCTCTCAGACATTTTAAGGATCAGCCTAAGTCCAAGCAGTTCATGCTCGGTCTCCAATCTGTGTTTCCGGTTTTCGACTGGGGACGTAGCTACAATCTCAAGAAGTTTCGTGGTGATCTCATTGCCGGTTTAACCATTGCCAGTCTCTGTATTCCTCAGGATATTGGATACGCTAAGCTCGCG…	MAVLVNGLSLWQKIITMASRAHPVDGDLSPATDGGDLPIKSSPHRHKVGIPPKQNMFHDFMYTFKETFFHDDPLRHFKDQPKSKQFMLGLQSVFPVFDWGRSYNLKKFRGDLIAGLTIASLCIPQDIGYAKLANLDPKYGLYSSFVPPLVYACMGSSRDIAIGPVAVVSLLLGTLLRAEIDPNTNPDEYLRLAFTATFFAGVTEAALGFFRLGFLIDFLSHAAVVGFMGGAAITIALQQLKGFLGIKQFTKKTDIIAVLDSVFSSARHGWNWQTILIGASFLTFLLTSKLIGKKNKKLFWIPAVAPLISVIISTFFVYITRADKQGVQIVKHLDKGINPSSFDQIYFSGDNLAKGIRIGVVAGMVALTEAVAIGRTFAAMKDYQIDGNKEMVALGVMNV…
	BniB03g057280	ATGGCCACGAGAGCTCATCCTGTGGACAGCGATGTAAGTCCGGCTACGGACGGTGGAGATCTTCAGATCAAATCGACGTTTCCACGGCATAAAGTTGGGGTCCCACCGAAGCAAAACATGTTCCATGATTTCATGTACACGTTCAAAGAAACTTTCTTCCACGATGATCCTCTCAGACATTTTAAGGATCAACCTAAGTCCAAGCAGTTCATGCTCGGTCTCCAATTTATATTCCCGGTTTTCGATTGGGGACGTAACTACGATCTCAAGAAGTTTCGTGGTGATCTCATTGCGGGTTTAACTATTGCCAGTCTCTGTATTCCTCAGGTAAAAAACCTATTCACACTAGTTTACTTGTGTCACAAGCCATCTATCCTTGCTTTGTTTATAAAGTATATT…	ATGGCCACGAGAGCTCATCCTGTGGACAGCGATGTAAGTCCGGCTACGGACGGTGGAGATCTTCAGATCAAATCGACGTTTCCACGGCATAAAGTTGGGGTCCCACCGAAGCAAAACATGTTCCATGATTTCATGTACACGTTCAAAGAAACTTTCTTCCACGATGATCCTCTCAGACATTTTAAGGATCAACCTAAGTCCAAGCAGTTCATGCTCGGTCTCCAATTTATATTCCCGGTTTTCGATTGGGGACGTAACTACGATCTCAAGAAGTTTCGTGGTGATCTCATTGCGGGTTTAACTATTGCCAGTCTCTGTATTCCTCAGGATATTGGATATGCTAAGCTCGCGAATCTGGACCCTAAATACGGTTTATATTCGAGTTTTGTACCTCCATTG…	MATRAHPVDSDVSPATDGGDLQIKSTFPRHKVGVPPKQNMFHDFMYTFKETFFHDDPLRHFKDQPKSKQFMLGLQFIFPVFDWGRNYDLKKFRGDLIAGLTIASLCIPQDIGYAKLANLDPKYGLYSSFVPPLVYACMGSSRDIAIGPVAVVSLLLGTLLRAEIDPNTNPDEYLRLAFTATFFAGVTEAALGFFRLGFLIDFLSHAAVVGFMGGAAITIALQQLKGFLGIKQFTKKTDIIAVLDSVFSSARHGWNWQTILIGASFLTFLLTSKLIGKKNKKLFWIPAVAPLISVIISTFFVYITRADKQGVQIVKHLDKGINPSSFDQIYFSGDNLAKGIRIGVVAGMVALTEAVAIGRTFAAMKDYQIDGNKEMVALGVMNVVGSMSSCYVATGSFSR…
	BniB03g062790	ATGAATGAAATCTCCCAAGAGAATATGAAGAACAACCTTTTGCAGGAAGCTCTGAAAGAAAGCTTACACTCATGGCTTTTACAAAACATAGCAGAAGGTGGAAAAGGTCCGAACGTGTTGGACGAAGGTGGCCAGGGTATATTAAACTTTGCTGCTGCTCTTGGTTACAACTGGGAACTAGAACCGACGATAGTCGCTGGTGTAAGCGTTGATTTTCGCGATGTAAATGGCTGGACTGCACTTCATTGGGCAGCTTTCTTTGGCAGGTAAGTAACATAAAGAGTTCACTAGTTTCATCTTATATGTTTTGTTTGATTATTGGTATCTGAAACAAACTGTATTTGCATGTTCAGGGAGCTGATAATTGGTTCTCTCATAGCTCTCGGTGCTTCTCCTGGA…	ATGAATGAAATCTCCCAAGAGAATATGAAGAACAACCTTTTGCAGGAAGCTCTGAAAGAAAGCTTACACTCATGGCTTTTACAAAACATAGCAGAAGGTGGAAAAGGTCCGAACGTGTTGGACGAAGGTGGCCAGGGTATATTAAACTTTGCTGCTGCTCTTGGTTACAACTGGGAACTAGAACCGACGATAGTCGCTGGTGTAAGCGTTGATTTTCGCGATGTAAATGGCTGGACTGCACTTCATTGGGCAGCTTTCTTTGGCAGGGAGCTGATAATTGGTTCTCTCATAGCTCTCGGTGCTTCTCCTGGAACTTTGAATGACCCGAATCCAGATTTCCCATCAGGAAGCACACCTTCTGATCTAGCCTATGCTAATGGCTACAAAGGAATCGCTGGT…	MNEISQENMKNNLLQEALKESLHSWLLQNIAEGGKGPNVLDEGGQGILNFAAALGYNWELEPTIVAGVSVDFRDVNGWTALHWAAFFGRELIIGSLIALGASPGTLNDPNPDFPSGSTPSDLAYANGYKGIAGYLSEYALRAHVSLLSLNEKNVETSLAAVETAPSPSSLALTDFLTAVRNASQAAARIHQVFRAQSFRKKQMKEFGDRKLGMSEECALSMLAPKTHKQGRAHSDDSVQAAAIRIQNKFRGYKGRKEYLITHQRIIKIQAHVRGYQVRKNYRKIIWSVGILEKVILRWRRKGDGLRGFKSDALVTKMQDGTEKLEDNDFFKQGRKQTEERLEKALARVKSMFQYPEARDQYRRLLNVVNDIQESKVEKALANSEEATCFDDDLIDIEAL…
	BniB03g070290	ATGAGTGAAGAACAAGCACACGCCAACCTTGCCGTTCCAGCGTTTCGAACTGAGAAAGTGCCGAAAACGCAAACGCAGACTCAGAATGGCCACGGTACCGTTTGGCGGTTCGGTGGGGCAGACAAGGCTGCGAAAGCCTCTACCGTGACGCTGAGAGGCGTTATCTACATGCTCTTCGACAACTGCAGCAAAGACGTCAACAAGACTGTCTTGCCCCTCGGCCATGGAGATCCTTCCGTCTATCCTTGCTTCCGCACCTGTATTGAGGCCGAAGACGCCGTCGTCGACGTCCTCCGCTCCGGAAAAGGCAATTCTTACGGTCCCGGAGCTGGGATTCTCCCGGCCAGAAGGTATATAAAATTTATTAATCCGATCAAGTCGATTCTCGATCTTGGCGAC…	ATGAGTGAAGAACAAGCACACGCCAACCTTGCCGTTCCAGCGTTTCGAACTGAGAAAGTGCCGAAAACGCAAACGCAGACTCAGAATGGCCACGGTACCGTTTGGCGGTTCGGTGGGGCAGACAAGGCTGCGAAAGCCTCTACCGTGACGCTGAGAGGCGTTATCTACATGCTCTTCGACAACTGCAGCAAAGACGTCAACAAGACTGTCTTGCCCCTCGGCCATGGAGATCCTTCCGTCTATCCTTGCTTCCGCACCTGTATTGAGGCCGAAGACGCCGTCGTCGACGTCCTCCGCTCCGGAAAAGGCAATTCTTACGGTCCCGGAGCTGGGATTCTCCCGGCCAGAAGAGCCGTCGCCGATTATCTGAACCGAGATCTTCCGAACAAGCTGACGCCG…	MSEEQAHANLAVPAFRTEKVPKTQTQTQNGHGTVWRFGGADKAAKASTVTLRGVIYMLFDNCSKDVNKTVLPLGHGDPSVYPCFRTCIEAEDAVVDVLRSGKGNSYGPGAGILPARRAVADYLNRDLPNKLTPDDIFLTAGCNQGIELVFESLARPNANILLPRPGFPHYDARAVYSGLEIRKFDLLPDKEWEIDLQGVEAVADDNTVAIVVINPNNPCGNVYSHDHLQKVAETARKLGIMVITDEVYDQTIFGDNPFVPMAKFASIVPVLTLGGISKGWVVPGWKIGWIALNDPEGVFESTKVVQSIKQNLDITPDPSTIIQAALPQILEKVDKNFFAKKNKILKHNVDLVCDRLKDIPCVVCPKKPESCTYLLTKLELSLLDNIKDDIDFCVKLARE…
	BniB04g000010	ATGGCCTCTCACTCTCAGGTCTCTTTTTCTCTTCTTTAACATGAATGAATCCATTGATGATCAATCGAATTCGTCCCTCCCTCCTTCACTGAACCAATTATTTCATAACAGGTTTTGGTGGAAGAGAAATCGAGTGTACGAATCTTGACACTGAACAGACCAAAGCAGCTGAATGCTCTCTCCTTCCAAATGGTATTGAACTTTTCCCCTTCTTCCTCCCTATTGCTCAATTGGTTTCGTCATGATGACTTCAATCTTCTCTAGATCTCTCGGTTGCTGCAACTGTTCCTTGCTTACGAGGAGGACCCTAGTGTGAAACTTGTTATCCTTAAGGTAATTACCATCCTTATTATCTCTTCTGTTTGCACGCGCACACACACACAGTGGAATAACAACTTT…	ATGGCCTCTCACTCTCAGGTTTTGGTGGAAGAGAAATCGAGTGTACGAATCTTGACACTGAACAGACCAAAGCAGCTGAATGCTCTCTCCTTCCAAATGATCTCTCGGTTGCTGCAACTGTTCCTTGCTTACGAGGAGGACCCTAGTGTGAAACTTGTTATCCTTAAGGGTCAGGGAAGAGCCTTTTGTGCTGGTGGTGATGTTTCAGCTGTTGTTCGTGACATCCAACAAGGCAATTGGAGACTCGGTGCCAAGTTCTTCTCTGATGAATACATGCTCAACTATGTTATGGCCACCTTTAGCAAACCTCAGGTTTCAATTTTGAATGGTATTGTCATGGGTGGCGGAGCTGGTGTCTCTGTCCATGGTCCTTTTCGTATTGCAACTGAGAACACGGTT…	MASHSQVLVEEKSSVRILTLNRPKQLNALSFQMISRLLQLFLAYEEDPSVKLVILKGQGRAFCAGGDVSAVVRDIQQGNWRLGAKFFSDEYMLNYVMATFSKPQVSILNGIVMGGGAGVSVHGPFRIATENTVFAMPETVLGLFPDVGASYFLSRLPGFFGEYVGLTGARLDGAEILACGLATHFVPSTRLTALEAELCKVDSSDPTFVSTILDAYTQRPHLKQQSAYHRLDVIDRCFSGRTVEEIIAALEREATHGGDDWISITIRALKKASPASLKISLRSIREGRLQGVGQCLSREYRMVCHVLKGDISKDFVEGCRAILIDKDKNPKWEPWRLEEMKDRMVEQYFKRVEEEEDLKLPPRKNLPALAMAKL-
	BniB04g002130	ATGGAGAGAAAGCCTCTAGAAGTTGAGTCCACGGATCACCAGAAACCTTACTCCGCCGTGTACGATGGCTCTGCTACGGCGGTTGATTCTGTTCAAGAAGAAGTTCAGGAGACGAAAGTCGTTTACAGAGGCTGGAAAGTCATGCCTTTCATCATTGGTAACAACAAAACATATTATTCACATTTAACATCAGTCTTGCTCAAAGAGTTGTTGGTTTAATTCACATTTTTAAAAAATATATTATTTTTTTTAAAAAAATATATTAAATATTAATAATAAATATAATATTTTCTATGATTACTAATTTTTCATAATTTCAGAAACTATATTTCTATAGTTTTAGAAATTTTGATAACTTTCTTCTATGTTTTTTTTTTCTCTGTTTCTTGAAAACTATAT…	ATGGAGAGAAAGCCTCTAGAAGTTGAGTCCACGGATCACCAGAAACCTTACTCCGCCGTGTACGATGGCTCTGCTACGGCGGTTGATTCTGTTCAAGAAGAAGTTCAGGAGACGAAAGTCGTTTACAGAGGCTGGAAAGTCATGCCTTTCATCATTGGAAACGAGACATTTGAGAAGCTTGGGATCATTGGAACACTATCAAACCTCCTGGTTTACTTAACCGCTGTCTTTAACATGAAGAGTATCACAGCTGCAACAATCATCAACGCCTTTAGTGGCACAATCAACTTCGGAACCTTCGTTGCTGCTTTCCTCTGCGACACTTACTTCGGTCGTTACAAGACACTAACCGTCGCGGTCATCGCATGTTTTCTTGGATCACTTGTGATACTACTAACT…	MERKPLEVESTDHQKPYSAVYDGSATAVDSVQEEVQETKVVYRGWKVMPFIIGNETFEKLGIIGTLSNLLVYLTAVFNMKSITAATIINAFSGTINFGTFVAAFLCDTYFGRYKTLTVAVIACFLGSLVILLTAAVPQLHPAPCGTALTCTGPSGGQIAFLLMGLGFLVVGAGGIRPCNLAFGADQFNPKSESGKRGIDSFFNWYFFTFTFAQILSLTLVVYIQSNVSWTIGLTIPVVLMFLACVIFFAGDKLYVKIKASGSPLASIAQVITVAIKKRGLKPVKQPWLNLYNYYPLNYANSKLKYTDQFRFLDKAAIFAPEDKLEADGKPVDPWKLCTMQQVEEVKCIVRVLPIWFASSIYYLTITQQMTYPVFQALQSDRRLGSGGFVIPAATYVVFL…
	BniB04g002670	ATGTTGTGTTGGAGAAGGGCTGAAGAAAGGGGCATGGACCACCGAGGAAGACAAGAAACTTATCTCTTACATCCACGAACACGGAGAAGGAGGCTGGCGCGACATGCCCCAAAAATCTGGTTAGTATATAATTTACATGTTTATTAGTATTTTTGTATAATATTTTGATGAGAATATGGTGTTTAATTGGGGTTAAAAAGGTGTGGAAAGAGTTGTAGACTGCGATGGACTAACTACCTAAAACCTGAGATCAAAAGAGGCGAGTTTAGCTCAGTGGAGGAACAGATTATTATCATGCTCCATGCTGCTCGTGGCAACAAGTACGTTTATTTATTTAGCAAAAAAAAAGTATGTTTTTTTTATTAACACTAAAACAAGTACGTTTGTTTTTAACAAAAA…	ATGTTGTGTTGGAGAAGGGCTGAAGAAAGGGGCATGGACCACCGAGGAAGACAAGAAACTTATCTCTTACATCCACGAACACGGAGAAGGAGGCTGGCGCGACATGCCCCAAAAATCTGGTGTGGAAAGAGTTGTAGACTGCGATGGACTAACTACCTAAAACCTGAGATCAAAAGAGGCGAGTTTAGCTCAGTGGAGGAACAGATTATTATCATGCTCCATGCTGCTCGTGGCAACAAGTGGTCGGTCATAGCGAGACATTTACCTAGAAGAACAGACAACGAGATCAAGAATTACTGGAACACTCATCTCAAGAAACGTCTGATCGAACGGGGTATTGATCCCGTGACTCACAAGCCACTAGCTTCTAATACTAACCCTACTGCCACCACACCACAG…	MLCWRRAEERGMDHRGRQETYLLHPRTRRRRLARHAPKIWCGKSCRLRWTNYLKPEIKRGEFSSVEEQIIIMLHAARGNKWSVIARHLPRRTDNEIKNYWNTHLKKRLIERGIDPVTHKPLASNTNPTATTPQPENLHSLDASSSDKPYSRSSSMPSRPLPLSFDFNTVSEITRNDGTPVQGGSLSCKKSIKKSSSTSRLLNKVAAKATSIKDILSSTTISYEGFPEQTRNEEDSSNALADFDPFSQSLLYTEHEMHATSDLDISYFLEKLGRDDHHNDEHNMNVEHGHDLLMSDVSQEVSSTSVDDQDNIFGNLEGWSSYLLDHAGYI-
	BniB04g003010	ATGGTGAGAACACCATGTTGCAAAGAAGAAGGAATAAAGAAAGGAGCATGGACTCCTGAAGAAGATCAAAAGCTTATTGCTTATCTTCGACTGCATGGTGAAGGTGGATGGCGTACTCTCCCGGAGAAAGCTGGTAACTCTTTTTTTTTAATCGTTTAATCATTAGGAATTTAACATAATTAACTAACAGCTGTTTCCTCTTATATATACATATATATATGTTAACAGTGTGTGTACAATATGTATTATAGGATTGAATAGATGTGGGAAGAGTTGTAGACTGAGATGGGCTAATTATCTAAGACCCGACATCAAGAGAGGAGAGTTTACTCCTGAAGAAGACGACACTATTATCAAGCTTCATATTCTTATGGGTAACAAGTAAGAATATTTTCCTTG…	ATGGTGAGAACACCATGTTGCAAAGAAGAAGGAATAAAGAAAGGAGCATGGACTCCTGAAGAAGATCAAAAGCTTATTGCTTATCTTCGACTGCATGGTGAAGGTGGATGGCGTACTCTCCCGGAGAAAGCTGGATTGAATAGATGTGGGAAGAGTTGTAGACTGAGATGGGCTAATTATCTAAGACCCGACATCAAGAGAGGAGAGTTTACTCCTGAAGAAGACGACACTATTATCAAGCTTCATATTCTTATGGGTAACAAGTGGGCCGCAATTGCAAGTAGTTTGGCTGGACGAACTGATAACGAGATTAAAAATTATTGGAACACAAACCTCAAGAAGCGTTTAAAACAAAAAGGTCTTGATCCAATCACTCATAAACCGATCAATCCAACCGGT…	MVRTPCCKEEGIKKGAWTPEEDQKLIAYLRLHGEGGWRTLPEKAGLNRCGKSCRLRWANYLRPDIKRGEFTPEEDDTIIKLHILMGNKWAAIASSLAGRTDNEIKNYWNTNLKKRLKQKGLDPITHKPINPTGFEPINHKLGSSGSARLLNRVARKYAGYLKRDLLTGVIVGNSLIIADDSQNSSNTEHSTTTLLGKPAAKLSAPVTSPHSFSDDLDVFFSNEEISDIYMNVDNVAFMEELKGILSYAGDIKDSPEHKVSDQMEFLEDDLDLENCF-
	BniB04g003060	ATGGCTTCGTCACTTCTGACATCTTCCGGAGTGATCCCTACCACTGGTTCCAACATGGTTGTCCGGTCATTCTTACCCTTTGGATCTGTCCGCCCGACCCGTCCGTACAACAACTCGTCCTTGCTCATCTCGTGTTGCTCCCCTGTGTCCAAAAACGCCGAGACTAGTGGTATTGACCTCAAACCCATCGTGGAACGGTGGCCGGAGTACATTCCCAACAAGGTACCTGACAAGAACTATGTGCGAGTATTCGACACGACGCTCCGTGACGGCGAACAATCTCCCGGTGCAGCCCTTACTCCACCGCAGAAGATAGAGATTGCCCGGCAGCTGGCTAAGCTTCGAGTAGACATCATGGAAGTTGGTTTCCCCGTGTCGTCAGAGGAAGAGTTCGAAACC…	ATGGCTTCGTCACTTCTGACATCTTCCGGAGTGATCCCTACCACTGGTTCCAACATGGTTGTCCGGTCATTCTTACCCTTTGGATCTGTCCGCCCGACCCGTCCGTACAACAACTCGTCCTTGCTCATCTCGTGTTGCTCCCCTGTGTCCAAAAACGCCGAGACTAGTGGTATTGACCTCAAACCCATCGTGGAACGGTGGCCGGAGTACATTCCCAACAAGGTACCTGACAAGAACTATGTGCGAGTATTCGACACGACGCTCCGTGACGGCGAACAATCTCCCGGTGCAGCCCTTACTCCACCGCAGAAGATAGAGATTGCCCGGCAGCTGGCTAAGCTTCGAGTAGACATCATGGAAGTTGGTTTCCCCGTGTCGTCAGAGGAAGAGTTCGAAACC…	MASSLLTSSGVIPTTGSNMVVRSFLPFGSVRPTRPYNNSSLLISCCSPVSKNAETSGIDLKPIVERWPEYIPNKVPDKNYVRVFDTTLRDGEQSPGAALTPPQKIEIARQLAKLRVDIMEVGFPVSSEEEFETIKTIAKTVGNEVDEETGYIPVICVIARSKERDIKAAWESVKYAKRPRIVVFTSTSDIHLKYKLKTTREEVVEITKSSIRFAKSLGFKDIEFGCEDGGRSDKDYVCKVFEEAIKAGATTVAFPDTVGINMPQEYGELVRYVKANTPGIDDVIFSVHCHNDLGVATANTIAGVCAGARQVEVTINGIGERSGNAPLEEVVMALKCRGAYLMGGVYTRIDTRQIMATSKMVQEYTGLYVQPHKPIVGANCFVHESGIHQDGVLKNRSTY…
	BniB04g005760	ATGAAGAGTAATAATACCAACTCAACAAGAAGCAATCTGCTGAAAGATAATGAACTGTTTCATGTGATTCACAAAGTCCCTTGTGGAGATACTCCGTATGTCAGAGCCAAACATGCTCAGGTACATATTCTTCTTCTTAGTTTTTTTTTTTTGTGTGAATCATATTTAGCAATCTTTCATGTATGATAGTTTATGTTAATTTCATTTACTGTTTCTTGGATTTTTAATGGAGATTAGTATAAAATATAAGTATATATATACATTTTAAGTGTAATTTTAACTTGATATAATCTGGATTAGATGTTGGCATGTTGCTGTATCTTTATTTGTTGTTTGCCTGAAATTTCTTACAGAAGAGAGAAATTATAAATAATCTTTTTAATATTTTCTAGTTCTGCC…	ATGAAGAGTAATAATACCAACTCAACAAGAAGCAATCTGCTGAAAGATAATGAACTGTTTCATGTGATTCACAAAGTCCCTTGTGGAGATACTCCGTATGTCAGAGCCAAACATGCTCAGTTAATAGAGAAGAACCCGGAGATGGCAATAGTGTGGTTTTGGAAAGCCATAAACACCGGAGACAGAGTAGACAGTGCCCTCAAGGACATGGCTGTTGTAATGAAACAACTTGACCGTTCCGAAGAAGCCATCGAAGCCATCAAATCCTTTCGTCCTCGATGTTCCAAGAACTCTCAAGATTCCCTCGATAATGTCCTCATCGACCTATACAAGAAATGCGGGAGAATGGAGGAGCAAGTTGAGCTGTTGAAGAGAAAGCTAAGGCAGATCTATCAAGGA…	MKSNNTNSTRSNLLKDNELFHVIHKVPCGDTPYVRAKHAQLIEKNPEMAIVWFWKAINTGDRVDSALKDMAVVMKQLDRSEEAIEAIKSFRPRCSKNSQDSLDNVLIDLYKKCGRMEEQVELLKRKLRQIYQGEAFNGKPTKTARSHGKKFQVTVQQEIARLLGNLGWAYMQQAKYLSAEAVYRKAQIVEPDANKSCNLAMCLIKQGRFEEARALLDDVFASRVLGADDCKTRQRADELLSELEASLPRRLDAEMEDVLGNILDDDFVLGLEEMTTNNYRSKRLPIFEQISSFRNQLVC-
	BniB04g007120	ATGGAGTTCGAGTCAGTGATAAAAATGCATTATCCGTATCTTGCATCTGTTATCTTCGATGACAATGTCACCTTAAAAGATGTTCATCCATCTATCACGAATGATGCTTCATGTATTCAAAACGTGCATCATAAACCTTTCCATGCTAATCTCGATAGGTCACATGTGCCATCGATTATAAACCCTGATATTTCTCACAAAAATCTAACATTGAAGATCTCAAACAATTCTTCCGATCATATTCCAAATCTAAACATTTCTCCTCGTCACTATGATATGCAGCCTCACACATTCGATACACTCTCAAAAGATATCTTTAATGTTATCACTCCCTCTCCATGCACTGAAGCTTTTGAGGCATATCTTCGTGGCATATCCAACGACCAAGATCTCTTTGAC…	ATGGAGTTCGAGTCAGTGATAAAAATGCATTATCCGTATCTTGCATCTGTTATCTTCGATGACAATGTCACCTTAAAAGATGTTCATCCATCTATCACGAATGATGCTTCATGTATTCAAAACGTGCATCATAAACCTTTCCATGCTAATCTCGATAGGTCACATGTGCCATCGATTATAAACCCTGATATTTCTCACAAAAATCTAACATTGAAGATCTCAAACAATTCTTCCGATCATATTCCAAATCTAAACATTTCTCCTCGTCACTATGATATGCAGCCTCACACATTCGATACACTCTCAAAAGATATCTTTAATGTTATCACTCCCTCTCCATGCACTGAAGCTTTTGAGGCATATCTTCGTGGCATATCCAACGACCAAGATCTCTTTGAC…	MEFESVIKMHYPYLASVIFDDNVTLKDVHPSITNDASCIQNVHHKPFHANLDRSHVPSIINPDISHKNLTLKISNNSSDHIPNLNISPRHYDMQPHTFDTLSKDIFNVITPSPCTEAFEAYLRGISNDQDLFDMACNTSQPVESNDVPNISHVPRDNTMWGNNQNQGLIYGAESIFNRAMVDSNLYGAHKPTGILDANENTIMNQRQNNQIMIKADQIKNNKRFQMRKGSKLTRKASIIKGQWTSDEDRLLMQLVGLHGTKRWSQIAKMLHGRVGKQCRERWHNHLRPDIKKDSWSEEEDRILIEAHKEIGNRWAEIARKLPGRTENTIKNHWNATKRKQHSRKTKGKDEVSLALGRDTLQNYIRSVTFNDDNLIAAASNSSTNNGRRNMRGKGKGVIV…
	BniB04g007960	ATGATCATGAGTATCATGAATATTACGAATCCATCTAGTTTCACACTTGTTCTATGTACCTTTACGTTGGCCTTGGCTCTCGTTATGCTTTCCTTGAGATCCAGGAAACCAGAAGGTCAGCTTCCTCCTGGGCCACGGGGATGGCCGATCGTAGGGAACTTGTTCCATATGATCATGAACCGACCAGTTCACGTGTGGATCCACCGTTCTATGGAGGAAATGCAAACGGAGATAGCTTGCTTCCGCTTCGCCCGCGTCCACGCCATCACCGTAACCTCAAGCGAGATCGCCCGAGAAGTGCTTAGAGAAAAGGACGAGGCTCTTGCAGACAGATCAGAGTCGTACTCGAGCAATCTCATTAGCCATGGCTACAAAGAAGTTATTTTCTCTTCCTACGGA…	ATGATCATGAGTATCATGAATATTACGAATCCATCTAGTTTCACACTTGTTCTATGTACCTTTACGTTGGCCTTGGCTCTCGTTATGCTTTCCTTGAGATCCAGGAAACCAGAAGGTCAGCTTCCTCCTGGGCCACGGGGATGGCCGATCGTAGGGAACTTGTTCCATATGATCATGAACCGACCAGTTCACGTGTGGATCCACCGTTCTATGGAGGAAATGCAAACGGAGATAGCTTGCTTCCGCTTCGCCCGCGTCCACGCCATCACCGTAACCTCAAGCGAGATCGCCCGAGAAGTGCTTAGAGAAAAGGACGAGGCTCTTGCAGACAGATCAGAGTCGTACTCGAGCAATCTCATTAGCCATGGCTACAAAGAAGTTATTTTCTCTTCCTACGGA…	MIMSIMNITNPSSFTLVLCTFTLALALVMLSLRSRKPEGQLPPGPRGWPIVGNLFHMIMNRPVHVWIHRSMEEMQTEIACFRFARVHAITVTSSEIAREVLREKDEALADRSESYSSNLISHGYKEVIFSSYGDSWKLMKKMMTTKLMSPTTLNKTVGDRTLEADNIVTYIFNLLREGSINVRDLALTYCHAVMMRMMFGQRHFDVAAEDGGLGPKEKEHMDAIYRALDCFFSFNVTDYLPFLRGWNIDNEEEEVREAVDILNRCNDPIIHARMHLWRNKGGKQTEEDWLDILITLKDDKGMPLFTFDEIRAQCKDINVATIDNTMNNVEWTIAEMLNNPEILEKATNELDVVVGKNRLVQESDIPQLNYIKACSRESFRLHPANAFMPPHGARQDTTL…
	BniB04g015560	ATGGATGATCATCGAAACCGTGTCTCTCTCTCTCCACCGGACGCTCACATGAGCAACTACTTCCTCAACCAGTCAACAGCAGCCACCACCGACGAAAACGCCTCCGCGGCGGCCGCGGCGATGGAAGCTTTCATCGGAACGAATCACTGGTCACAGACCCCTCCTCCTCCTCATCCTCCACCTCCGCCGCTGTCTTCTCAGTTCAACGAAGACACTCTCCAGCAACGTCTCCAGACGCTGATCGAGTCCGCGGGCGAGAGATGGACGTACGCGATCTTCTGGCAGATCTCGCACGACTTCGACTCTCCCGCCGGAGAGAACACGGTGATTCTCGGGTGGGGAGACGGGTACTACAGAGGAGAAGAAGACAAAGCGAAGAAGTTGAAGAGCTCGAGTTCG…	ATGGATGATCATCGAAACCGTGTCTCTCTCTCTCCACCGGACGCTCACATGAGCAACTACTTCCTCAACCAGTCAACAGCAGCCACCACCGACGAAAACGCCTCCGCGGCGGCCGCGGCGATGGAAGCTTTCATCGGAACGAATCACTGGTCACAGACCCCTCCTCCTCCTCATCCTCCACCTCCGCCGCTGTCTTCTCAGTTCAACGAAGACACTCTCCAGCAACGTCTCCAGACGCTGATCGAGTCCGCGGGCGAGAGATGGACGTACGCGATCTTCTGGCAGATCTCGCACGACTTCGACTCTCCCGCCGGAGAGAACACGGTGATTCTCGGGTGGGGAGACGGGTACTACAGAGGAGAAGAAGACAAAGCGAAGAAGTTGAAGAGCTCGAGTTCG…	MDDHRNRVSLSPPDAHMSNYFLNQSTAATTDENASAAAAAMEAFIGTNHWSQTPPPPHPPPPPLSSQFNEDTLQQRLQTLIESAGERWTYAIFWQISHDFDSPAGENTVILGWGDGYYRGEEDKAKKLKSSSSNPAEQEHRKRVIRELNSLIAGAGAGVSDEANDEEVTDTEWFFLVSMTQSFVNGVGLPGESFLNSRVIWLSGSGALTGSGCERARQGEVYGLQTIVCIAAENGVVELGSSEVISQSSDLMDKVNGLFNGNGGEASSWGFNLNPDQGENDPALWLSEPNVTGIEPVQEAPAIQNPCGLNFSSSGLNQNGKFKEGSSSNKKRSPVSKDEEMLSFSTVVRSAAKSGDSDHSDIEASVVKEAIIVEPEKKPRKRGRKPANGREEPMNHVEA…
	BniB04g019280	ATGGAGTCAGCAACCTTAACCGAGACAAACTCACCGAAGCTCGACCAGAACGTGACAGAGTCATCAACAGAGTTTGGGAAGAATCGGAAACGGTACCAAGACCTGATCGCAACGTTTCCACATGAGAAAGGCTGGAGACCTAAAGCTCCCTTGATTGAATACAGTGGCCACTGGTTTATACAGCCTCTCCTTGAAGGCAGCCTTCACGCGCAAGAGTTCTTCCAAGCGCGGCCCATTGACTTCCTCGTCTGTAGCCACCCAAAGACAGGAACCACTTGGCTCAAAGCTCTCACTTCCGCCATCGCCAACCGATCCCGCTTCGACGATACCTCAAACCCTCTCCTGAAACGTAACCCTCACGAGCTGGTTCCTTTCATTGAGATGGAGTTCCCTTTCTTC…	ATGGAGTCAGCAACCTTAACCGAGACAAACTCACCGAAGCTCGACCAGAACGTGACAGAGTCATCAACAGAGTTTGGGAAGAATCGGAAACGGTACCAAGACCTGATCGCAACGTTTCCACATGAGAAAGGCTGGAGACCTAAAGCTCCCTTGATTGAATACAGTGGCCACTGGTTTATACAGCCTCTCCTTGAAGGCAGCCTTCACGCGCAAGAGTTCTTCCAAGCGCGGCCCATTGACTTCCTCGTCTGTAGCCACCCAAAGACAGGAACCACTTGGCTCAAAGCTCTCACTTCCGCCATCGCCAACCGATCCCGCTTCGACGATACCTCAAACCCTCTCCTGAAACGTAACCCTCACGAGCTGGTTCCTTTCATTGAGATGGAGTTCCCTTTCTTC…	MESATLTETNSPKLDQNVTESSTEFGKNRKRYQDLIATFPHEKGWRPKAPLIEYSGHWFIQPLLEGSLHAQEFFQARPIDFLVCSHPKTGTTWLKALTSAIANRSRFDDTSNPLLKRNPHELVPFIEMEFPFFPDIDVVKDKGNTLFATHLPHGLLPESVSKSGCKMVYIWRDPKDTFISMWTFFQKQRVDNGPLNSLEESFDMFCRGLSGYGPFLDHVLSYWKAYQKNPDQILFLKYETMRADPLPYVKKLAEFMGYGFTAEEEKEGVVEKVENLCSFETLKNLEPNIGEKDREDRPCLYVTSAYFRKGNVGDWQNYLTPEMVARIDGLMEEKFKGTGLLEHGK-
	BniB04g020560	ATGGCATCTGAACAACAAATCTTCCGCGGAACACAAGAGGAGTCCTCAAATCCTCCTTCTCTATCTATACACGAACTAGACTCCCTAATCGATAACACCATGCCGAGCCACCAAGACGAGGCCAAGATAAAGTCAGCAGAGTACGAGAAGATTCAGAAACGGTACCAAGACCTAATAGCCACGTTGCCTCACGCGAAAGGCTGGTTCGAGAAGGCTCCCTTCGTCGGTTACGGCGGTCACTGGATCATAGAGCCTCTCCTTGCAGGTTGCCTTCACGCGCAAGACTTCTTCCAAGCGCGACCCGTTGACTTTTTCATTTGTAGCTATCCAAAGTCAGGTACCACTTGGCTCAAAGCCCAAGCTTTCTCTATCGTCAACCGATCTCGCTTCGACGATTCC…	ATGGCATCTGAACAACAAATCTTCCGCGGAACACAAGAGGAGTCCTCAAATCCTCCTTCTCTATCTATACACGAACTAGACTCCCTAATCGATAACACCATGCCGAGCCACCAAGACGAGGCCAAGATAAAGTCAGCAGAGTACGAGAAGATTCAGAAACGGTACCAAGACCTAATAGCCACGTTGCCTCACGCGAAAGGCTGGTTCGAGAAGGCTCCCTTCGTCGGTTACGGCGGTCACTGGATCATAGAGCCTCTCCTTGCAGGTTGCCTTCACGCGCAAGACTTCTTCCAAGCGCGACCCGTTGACTTTTTCATTTGTAGCTATCCAAAGTCAGGTACCACTTGGCTCAAAGCCCAAGCTTTCTCTATCGTCAACCGATCTCGCTTCGACGATTCC…	MASEQQIFRGTQEESSNPPSLSIHELDSLIDNTMPSHQDEAKIKSAEYEKIQKRYQDLIATLPHAKGWFEKAPFVGYGGHWIIEPLLAGCLHAQDFFQARPVDFFICSYPKSGTTWLKAQAFSIVNRSRFDDSSNPLLKRNPHELVPFLEIELAFFPQIDVVKDEGNTLFSTHMPHGLLPESISKSGCKMVYIWRDPKDTFISMWTFFQKQKFGSGTLNSLEECFDMFCRGFSGYGPYLDHVMSYWKAYKENPNKVLFLKYETMRGDPLPYVRILAEFMGYGFTAEEEEKGVVEKVVNLCSFETLKNLEANKGEKYREDIPLNAYQNSAYFRKGKVGDWQTYLTPEMAARIDGLMEEKFKGTGLLEHF-
	BniB04g020570	ATGGATTCAGAAACCATTACCAATGCGACCCTACAGAACAACCAAAACGAAACCGAGAGAGAGTTTGAGAAGAATCAGAAACGGTACCAAGACCTAATCGCCTCGTTTCCTCACACCCAAGGCTGGAGACCAAAAGCTCCACTGATCGGGTACGGTGGTCACTGGATTGTGAAGCCTCTCCTCGAACGTTGGCTTCACGCGCGAGACGTCTTCCAAGCACGACCCAATGACTTCTTCGTTTGTAGCTACCCAAAGTCAGGTACCACTTGGCTCAAAGCTCTAACTTTCGCCATCGCAAATCGATCTGGCGCTGACCCTGACCAATCCTCAAACCCTCTTCTAAAATGTAACCCTCACGAGCTTGTTCCTTTCATCGAGGGTGAACTCCCTTTGCTCCCT…	ATGGATTCAGAAACCATTACCAATGCGACCCTACAGAACAACCAAAACGAAACCGAGAGAGAGTTTGAGAAGAATCAGAAACGGTACCAAGACCTAATCGCCTCGTTTCCTCACACCCAAGGCTGGAGACCAAAAGCTCCACTGATCGGGTACGGTGGTCACTGGATTGTGAAGCCTCTCCTCGAACGTTGGCTTCACGCGCGAGACGTCTTCCAAGCACGACCCAATGACTTCTTCGTTTGTAGCTACCCAAAGTCAGGTACCACTTGGCTCAAAGCTCTAACTTTCGCCATCGCAAATCGATCTGGCGCTGACCCTGACCAATCCTCAAACCCTCTTCTAAAATGTAACCCTCACGAGCTTGTTCCTTTCATCGAGGGTGAACTCCCTTTGCTCCCT…	MDSETITNATLQNNQNETEREFEKNQKRYQDLIASFPHTQGWRPKAPLIGYGGHWIVKPLLERWLHARDVFQARPNDFFVCSYPKSGTTWLKALTFAIANRSGADPDQSSNPLLKCNPHELVPFIEGELPLLPQNDVVEDKENTLFSTHIPYGLLPESISKAGCKMVYIWRDPKDTFVSMWNFFQKERSDNGPLNSLEESFDMFCRGHSLYGPFLDHVMSYWKAYQEKPDQVFFLKYETIRADPLPYVKRLAEFMGYGFTAEEEEKGVVEKVVNLCSFESLKNVEANKGEKDKEDIKGKNSGDVVPSKFYPNSAYFRKGKVGDWSNYLTPEMAARIDGLMEEKFKGTGLSEHRS-
	BniB04g021440	ATGGCACCAGCTCAAAACCCAATCAGTTCGAAACACGTGGCGGTGGTCGGAGCCGGAGCATCCGGTTTAATAGCGGCCAGAGAGCTCCATCGTGAAGGTCACACCGTCGTCGTTTTCGAGCGGGAAAAACAAGTGGGAGGTCTCTGGATTTACTCACCTAAAGCTGAATCCGACCCGCTTGGTCTTGACCCGACAAGACCTATAGTTCACTCGAGTGTCTACGAGTCTCTCCGGACCAACCTCCCAAGAGAGTGTATGGGTTTCAGGGATTTTCCGTTCGTGCCATGTGTTGATGACTTGTCAAGAGACCCGAGAAGGTATCCGAGCCACAGGGAAGTTCTTGCGTACCTTCAAGACTTTGCTAGAAAGTTTAAATTAGAGGAGATGGTCCGGTTCGAG…	ATGGCACCAGCTCAAAACCCAATCAGTTCGAAACACGTGGCGGTGGTCGGAGCCGGAGCATCCGGTTTAATAGCGGCCAGAGAGCTCCATCGTGAAGGTCACACCGTCGTCGTTTTCGAGCGGGAAAAACAAGTGGGAGGTCTCTGGATTTACTCACCTAAAGCTGAATCCGACCCGCTTGGTCTTGACCCGACAAGACCTATAGTTCACTCGAGTGTCTACGAGTCTCTCCGGACCAACCTCCCAAGAGAGTGTATGGGTTTCAGGGATTTTCCGTTCGTGCCATGTGTTGATGACTTGTCAAGAGACCCGAGAAGGTATCCGAGCCACAGGGAAGTTCTTGCGTACCTTCAAGACTTTGCTAGAAAGTTTAAATTAGAGGAGATGGTCCGGTTCGAG…	MAPAQNPISSKHVAVVGAGASGLIAARELHREGHTVVVFEREKQVGGLWIYSPKAESDPLGLDPTRPIVHSSVYESLRTNLPRECMGFRDFPFVPCVDDLSRDPRRYPSHREVLAYLQDFARKFKLEEMVRFETEVVRVEPVDGKWRVQSKNSGDLSDDEIFDAVVVCSGHYTEPYVAHIPGIKSWPGKQIHSHNYRVPGPFKNEVVVVIGNFASGADISRDVAKVAKEVHIASRGSEANTYEKLSVPTNNLWIHSEIETACEDGSIIFKNGKAVHADTVVYCTGYNYKFPFLETNGYLSIDDNRIEPLYKHVFPPALAPGLSFVGLPGMGIQFVMFEIQSKWVAAVLSGRVTLPSLEKMMEDLIASYAMLEALGIPKRHTHKLGKIQSNYLDWVAEEC…
	BniB04g033080	ATGGTGCGGACACCATGTTGCAAAGCTGAGTTAGGGTTAAAGAAAGGAGCTTGGACTCCCGAGGAAGATCAGATGCTTGTCTCCTACGTTAACCGTCACGGTGAAGGTGGATGGCGAACTCTCCCTGAAAAAGCTGGTATTTATATTTTGTTTATTATTATTTATTCCGTCATTTTTGAATATTCAATGTTGGTCTTTCTACTATTATTTGATCAATAGTAAAAAAATAGTTTATATAAATCAATTATTTTGACCAAAAAATAAAATAAATCAATTATTTAATGGTTATTTAAATGGAATAGGACTCAAGAGATGTGGCAAAAGCTGCAGACTGAGATGGGCAAATTATCTAAGACCTGACATCAAAAGAGGAGAGTTCACTGAAGAAGAAGAACGCTC…	ATGGTGCGGACACCATGTTGCAAAGCTGAGTTAGGGTTAAAGAAAGGAGCTTGGACTCCCGAGGAAGATCAGATGCTTGTCTCCTACGTTAACCGTCACGGTGAAGGTGGATGGCGAACTCTCCCTGAAAAAGCTGGACTCAAGAGATGTGGCAAAAGCTGCAGACTGAGATGGGCAAATTATCTAAGACCTGACATCAAAAGAGGAGAGTTCACTGAAGAAGAAGAACGCTCTATCATCTCTCTTCACGCCCTTCACGGCAACAAATGGGCTGCTATAGCTCGTGGATTACCAGGAAGAACCGATAACGAAATCAAGAACTACTGGAACACTCATATCAAAAAACGTTTGATCAAGAAAGGTGTCGATCCGGTTACACACAAGAGCTTGATCTCTGGC…	MVRTPCCKAELGLKKGAWTPEEDQMLVSYVNRHGEGGWRTLPEKAGLKRCGKSCRLRWANYLRPDIKRGEFTEEEERSIISLHALHGNKWAAIARGLPGRTDNEIKNYWNTHIKKRLIKKGVDPVTHKSLISGTSKTENLQEILDKQNIIQTTITSDDDLGNGKVKNEDKNSRLSSARFLNRVANRFGKQINQSVLSEMIRSGGPRTTITSVTVNSESDKSTSSSFSPTSNLLCQMTVNGMSSPSMFSDSSVDDSLMYCDSVSNIGFSGFLNDQHFMMLEESCAENTEFMTELTRFLQGDVNDEVEVTPEYQDDFEEIDNYFA-
	BniB04g033130	ATGGAATCCAAATCCGAAAACGACGTCCTTGCATCATCGCCACCATCAGAATTCGAGAAGAACCAGAAACATTACCAAGAAACCATCGCCACGCTTCCTCACCAAAACGGCTGGCGACCAAAAGACCCTTTCGTCGAATACGGCGGCCACTGGTGGCTCCAGCCTCTCCTCGAAGGCCTTCTCCACGCCCAAAGATTCTTCAAAGCCCGGCCCAACGACTTCTTCATCTGCAGCTACCCGAAAACCGGAACCACGTGGCTCAAAGCCTTAACCTTCGCGATCGCAAACCGCTCCAAGTTCGAAGACGACTCGACGAACCCTCTCCTCAAACGCAACCCGCACGAGTTCGTGCCTTACATCGAGATCGACTTCCCGTTCTTCCCGAGCGTCGACGTCCTC…	ATGGAATCCAAATCCGAAAACGACGTCCTTGCATCATCGCCACCATCAGAATTCGAGAAGAACCAGAAACATTACCAAGAAACCATCGCCACGCTTCCTCACCAAAACGGCTGGCGACCAAAAGACCCTTTCGTCGAATACGGCGGCCACTGGTGGCTCCAGCCTCTCCTCGAAGGCCTTCTCCACGCCCAAAGATTCTTCAAAGCCCGGCCCAACGACTTCTTCATCTGCAGCTACCCGAAAACCGGAACCACGTGGCTCAAAGCCTTAACCTTCGCGATCGCAAACCGCTCCAAGTTCGAAGACGACTCGACGAACCCTCTCCTCAAACGCAACCCGCACGAGTTCGTGCCTTACATCGAGATCGACTTCCCGTTCTTCCCGAGCGTCGACGTCCTC…	MESKSENDVLASSPPSEFEKNQKHYQETIATLPHQNGWRPKDPFVEYGGHWWLQPLLEGLLHAQRFFKARPNDFFICSYPKTGTTWLKALTFAIANRSKFEDDSTNPLLKRNPHEFVPYIEIDFPFFPSVDVLKDEGNTLFSTHIPYNLLPESILKSGCKMVYIWRDPKDTFVSMWTFAHKERSQQGDLVGIEEAFDKFCQGLSAYGPYLDHVLGYWKAHESNPEKVLFLKYEAMRGDPLPYVKRLAEFMGYGFTEEEEREGVVERVVKLCSFETLKNLEANKGEKDREDRPAVYANSAYFRKGKVGDWENYLSQKMVARIDGLMEDKFKGTGFLASTP-
	BniB04g035790	ATGGGAATCCTTACTGAAGAAACATTAAGCTCTAACACCAAAACCCAAATACTTATCGATGACGATAACGAGTTGGGTTTGATGGCCGTGAGAATAGCCAATGCTGCCGCCTTTCCGATGGTTCTCAAAGCTGCTCTCGAACTCGGTGTCTTTGACACTCTCTACACCGCCTCGGTGTTCCTCTCACCTTCTGAGATATCAAGTCGGCTACCAACCACACCTCGTAACCCAGGAGCACCGGTTTTGCTGGACCGGATGCTCCGCCTACTCGCTAGTTACTCCATGGTCAAGTGCGGTACGGTTCAAGCCGGAAAAGGCGAGAGGGTCTACAAGGCTGAGCCAATTTGCAGGTTCTTCTTGAAAGATAACATTCAAGATATTGGATCCCTTGCTTCTCAA…	ATGGGAATCCTTACTGAAGAAACATTAAGCTCTAACACCAAAACCCAAATACTTATCGATGACGATAACGAGTTGGGTTTGATGGCCGTGAGAATAGCCAATGCTGCCGCCTTTCCGATGGTTCTCAAAGCTGCTCTCGAACTCGGTGTCTTTGACACTCTCTACACCGCCTCGGTGTTCCTCTCACCTTCTGAGATATCAAGTCGGCTACCAACCACACCTCGTAACCCAGGAGCACCGGTTTTGCTGGACCGGATGCTCCGCCTACTCGCTAGTTACTCCATGGTCAAGTGCGGTACGGTTCAAGCCGGAAAAGGCGAGAGGGTCTACAAGGCTGAGCCAATTTGCAGGTTCTTCTTGAAAGATAACATTCAAGATATTGGATCCCTTGCTTCTCAA…	MGILTEETLSSNTKTQILIDDDNELGLMAVRIANAAAFPMVLKAALELGVFDTLYTASVFLSPSEISSRLPTTPRNPGAPVLLDRMLRLLASYSMVKCGTVQAGKGERVYKAEPICRFFLKDNIQDIGSLASQVIVNFDSVFLNTWGQLKDVVLEGGDAFGRAHGGMKLFDYMGTDERFSKLFNQTGFTIAVVKKALEVYQGFEDVNVLVDVGGGVGNTLGVVTSKYPNIKGINFDLTCALAQAPSYPGVEHVAGDMFVDVPKGDAMILKRILHDWTDEDCVKILKNCWKSLPENGKVVVIELVTPDDAENGDINANIAFDMDMLMFTQCSGGKERSRAEFAALAAASGFTHCKFVCPAYHCWIIEFCKENV
	BniB04g039340	ATGGCGGAAACAACAACAACAACAAAGACCAATTCCAAAGGCCATGTCGTGGTCTTACCTTACCCAGTTCAAGGCCACCTCAACCCAATGGTCCAGTTCGCTAAACGCCTAGTCTCCAAAGGCGTCAAAGTCACAATCGCCACCACCACCTACACCGCCTCCTCCGTCTCCACCCCCTCCGTCTCCGTCGAGCCAATCTCCGACGGACACGACTTCATCCCCCTAGGCGTCCCCGGCGTCAGCATCGACGCCTACTCCGAATCCTTCAAGCTCAACGGCTCCGAAACCTTAACCCGAGTCATCGAGAAATTCAAATCTACCGATTCGCCGATCGATTCATTAGTCTACGACTCCTTTCTCCCGTGGGGACTCGAAGTCGCGAGATCTAACTCCATCTCC…	ATGGCGGAAACAACAACAACAACAAAGACCAATTCCAAAGGCCATGTCGTGGTCTTACCTTACCCAGTTCAAGGCCACCTCAACCCAATGGTCCAGTTCGCTAAACGCCTAGTCTCCAAAGGCGTCAAAGTCACAATCGCCACCACCACCTACACCGCCTCCTCCGTCTCCACCCCCTCCGTCTCCGTCGAGCCAATCTCCGACGGACACGACTTCATCCCCCTAGGCGTCCCCGGCGTCAGCATCGACGCCTACTCCGAATCCTTCAAGCTCAACGGCTCCGAAACCTTAACCCGAGTCATCGAGAAATTCAAATCTACCGATTCGCCGATCGATTCATTAGTCTACGACTCCTTTCTCCCGTGGGGACTCGAAGTCGCGAGATCTAACTCCATCTCC…	MAETTTTTKTNSKGHVVVLPYPVQGHLNPMVQFAKRLVSKGVKVTIATTTYTASSVSTPSVSVEPISDGHDFIPLGVPGVSIDAYSESFKLNGSETLTRVIEKFKSTDSPIDSLVYDSFLPWGLEVARSNSISAAAFFTNNLTVCSVLRKFASGEFSLPADPISAPYLVRGLPALSYDELPSFVGRHWLSHAEHGRVLLNQFRNHEDADWLFVNGFEGLETQGCEVGESEAMKATLIGPMIPSAYLDGRIEEDKGYGSSLMKPLSEECMEWLGTKPSQSVVFVSFGSFGILFEKQLAEVATALQESNFNFLWVIKEAHIAKLPEGFVEATKDRALLVSWCNQLEVLAHESIGCFLTHCGWNSTLEGLSLGVPMVGVPQWSDQMNDAKFVEEVWRVGYRA…
	BniB04g039630	ATGGCTCAGAACGATACGGTGAAGCTCCTAGGTTCTTGGTCGAGCCCTTATGCCCTTAGGGCTCGAGTGGCTCTACACTTGAAATCAGTGGAGTACGAGTACTTGGACGAACCTGATGTTCTCAACTCAAAGAGCGAACTCCTTCTCAAGTCCAACCCCATCTTCAAGAAAGTCCCTGTTCTCATCCACGGCGATGTTTCCATCTGTGAGTCACTCAACATCGTTGAGTACGTCGATGAAGCTTGGTCCTCAGGTCCTTCCATCCTTCCTTCTCACCCTTACGAACGTGCTAACGCTCGCTTCTGGGCTCTCTTCGTCGACGACAAGGTACACAAGACTTTAGATCAAACTCCATGGATCTCTATTGGATTTACCTACACATGCTCTGTGTCTTTTTTT…	ATGGCTCAGAACGATACGGTGAAGCTCCTAGGTTCTTGGTCGAGCCCTTATGCCCTTAGGGCTCGAGTGGCTCTACACTTGAAATCAGTGGAGTACGAGTACTTGGACGAACCTGATGTTCTCAACTCAAAGAGCGAACTCCTTCTCAAGTCCAACCCCATCTTCAAGAAAGTCCCTGTTCTCATCCACGGCGATGTTTCCATCTGTGAGTCACTCAACATCGTTGAGTACGTCGATGAAGCTTGGTCCTCAGGTCCTTCCATCCTTCCTTCTCACCCTTACGAACGTGCTAACGCTCGCTTCTGGGCTCTCTTCGTCGACGACAAGATCTTTGGATCGTTGGATGCGGTGGGAGGAGCAAAAGACGACGAAGGGAGGATGGCGGCGGCGGGGAAGCTG…	MAQNDTVKLLGSWSSPYALRARVALHLKSVEYEYLDEPDVLNSKSELLLKSNPIFKKVPVLIHGDVSICESLNIVEYVDEAWSSGPSILPSHPYERANARFWALFVDDKIFGSLDAVGGAKDDEGRMAAAGKLMECLATLEEAFQKTSKGLGFFGGENIDYLDIACGTILGPISVIEAFSGVKFLREETTPGLIQWAEKFRAHEAVKPYMPTVEEFIAFAKKKFGVE-
	BniB04g040670	ATGGCAGCAGTTCCAACTTTTCCTCATATTCCGTCCGTAGCTCGGCCTGCTAAACAAGCAATTCCTTCAGTTCAAACATCTTCAGCATCGCCAGTCTCTCAAGAAATGGTCACCAAAGCCGAGAATGCACCAGATATTAAGTCTGCAGTTGGTGGAATGACGTCACAATTGTGTACTAGCCCTCCTGGTGGAGCTAATGTGAATCTGCTGAATAATCTTTCTCAAGTTCGACAAGTCATGAGCTCTGCAGCTCTGGCTGGTGCATCCTCGTCTGGGCAAAGTGTGGTTGCAATGCATATGTCAAATATGATATCAACATAAATGGTTACATCTCTGCTTTCTTCACAAACTGCATTCTCATCTAGACAGCAGGGAATTACTTCAGTGGCTGGTTCGGGT…	ATGGCAGCAGTTCCAACTTTTCCTCATATTCCGTCCGTAGCTCGGCCTGCTAAACAAGCAATTCCTTCAGTTCAAACATCTTCAGCATCGCCAGTCTCTCAAGAAATGGTCACCAAAGCCGAGAATGCACCAGATATTAAGTCTGCAGTTGGTGGAATGACGTCACAATTGTGTACTAGCCCTCCTGGTGGAGCTAATGTGAATCTGCTGAATAATCTTTCTCAAGTTCGACAAGTCATGAGCTCTGCAGCTCTGGCTGGTGCATCCTCGTCTGGGCAAAGTGTGGTTGCAATGCATATACAGCAGGGAATTACTTCAGTGGCTGGTTCGGGTGCATTAGTGGGGACTGAACAAGCGGGACAAAGCCCGGCTCCTAATAATGCCTTTAGTCCTCCAACA…	MAAVPTFPHIPSVARPAKQAIPSVQTSSASPVSQEMVTKAENAPDIKSAVGGMTSQLCTSPPGGANVNLLNNLSQVRQVMSSAALAGASSSGQSVVAMHIQQGITSVAGSGALVGTEQAGQSPAPNNAFSPPTTSIIAANLGVSQPMQGMNQGSHSGVQMMQSGISMNQNMMSGIGQGNVSSGTGGMMPTPGVGQQAQSGIQQLSGSNSSALNMQLSQQSEIYLGRDKDSLFLSPDLRVTEVLLPLIPTSATPTTATNQAAISPTTVAATTYPATTTTTTDPAAATPPPPIATAATTPAAAASNVIAPTSSAETATTTLVVAASTSSPTAADITTESDAAAAALTDGWVNGWLSFCASSWKITTRWWWRRAAHHDTSWLHGIKLDISSSSFLLSAN
	BniB04g049150	ATGACAGATTACCGGCTACAGCAAACGATGAATCTCTGGACCACCGACGATAACGCCTCTATGATGGAAGCTTTCATGAGCTCCGCCGACATGTCAGCCTTGTGGCAATCAGAAACGGCAACGGCTTCGGCAACAGCTCCGGCGCCGGCGATGGAGATTCCGGCGGGATTTAGCCAGGAGACTCTCCAGCAAAGGCTACAAGCTCTGATTGAAGGGACACACGAAGGCTGGACCTACGCTATATTCTGGCAGCCGTCGTACGATTTCTCCGGCGCCTCCGTTCTCGGCTGGGGTGATGGTTATTACAAAGGAGAGGAAGATAAAGGAAAGCCGAGGCAGAGGTCGACTTCACCGCCGTTTTCGACTCCGGCGGATCAGGAGTATCGTAAGAAGGTGTTG…	ATGACAGATTACCGGCTACAGCAAACGATGAATCTCTGGACCACCGACGATAACGCCTCTATGATGGAAGCTTTCATGAGCTCCGCCGACATGTCAGCCTTGTGGCAATCAGAAACGGCAACGGCTTCGGCAACAGCTCCGGCGCCGGCGATGGAGATTCCGGCGGGATTTAGCCAGGAGACTCTCCAGCAAAGGCTACAAGCTCTGATTGAAGGGACACACGAAGGCTGGACCTACGCTATATTCTGGCAGCCGTCGTACGATTTCTCCGGCGCCTCCGTTCTCGGCTGGGGTGATGGTTATTACAAAGGAGAGGAAGATAAAGGAAAGCCGAGGCAGAGGTCGACTTCACCGCCGTTTTCGACTCCGGCGGATCAGGAGTATCGTAAGAAGGTGTTG…	MTDYRLQQTMNLWTTDDNASMMEAFMSSADMSALWQSETATASATAPAPAMEIPAGFSQETLQQRLQALIEGTHEGWTYAIFWQPSYDFSGASVLGWGDGYYKGEEDKGKPRQRSTSPPFSTPADQEYRKKVLRELNSLISGGAVSDDAVDEEVTDTEWFFLVSMTQSFACGAGLAGKAFSTANPVWVSGSDQLSGSGCERAKQGGVFGMQTIACIPSAHGVVELGSTEQIRQSSDLVNKVRILFNFDGGAGDLSGLNWNLDPDQGENDPSIWVNDPIGAPEPGNGAPSSSSQLFSKSIQFENGGSSSTLTENPNPTLTPTQNPKFNSRELNFSTSSTTLVKPRPGEILSFGDEGKRCSINPDPSSYSGQTQFENKRKKSLGLTEDKVLSFGAGGGESD…
	BniB04g060340	ATGGCTCCATCTGTGCAGCCTTCTTCATCGCCGCTTCGTACAAGGTTCAACATCAACATCGAACCTCAATCTGTTTTGTAAAAATCAATCCTTTTTATTACTAATGTCCTGAATCTCTTTTGATATGTGTGTTTTTAAACAGCGAAGGCGATGAGAAATATGCGAATGTAAAATGGGAAGAGCTTGGATTCGCTCTGACCCCAACAGATTGCATGTACGTGGCCAAGTGCAGACAAGGGGAGAGTTTCACAGAAGGGAAGATTGTTCCTTATGGGGACATCTCAGTCAGCCCTTGTTCTCCTATTCTCAACTATGGCCAGGTTCTCTTTGTAGTCACTTACAAAACTTATGATCTTTGTTGTGATCTTAAAACCAAAACGTTAATTTGCTTTGCATATT…	ATGGCTCCATCTGTGCAGCCTTCTTCATCGCCGCTTCGTACAAGCGAAGGCGATGAGAAATATGCGAATGTAAAATGGGAAGAGCTTGGATTCGCTCTGACCCCAACAGATTGCATGTACGTGGCCAAGTGCAGACAAGGGGAGAGTTTCACAGAAGGGAAGATTGTTCCTTATGGGGACATCTCAGTCAGCCCTTGTTCTCCTATTCTCAACTATGGCCAGGGACTATTTGAAGGTCTGAAAGCTTACAGGACAGAAGACGACCGGATTCTGATTTTCAGGCCTCACCAAAACGCATTTCGCATGCAAGATGGTGCAGAAAGGCTTTGTATGGCATCACCTTCTGTGGAACACTTTGTCGAAGCTGTTAAGCAAACTGTGAATGCCAACAAGAAATGG…	MAPSVQPSSSPLRTSEGDEKYANVKWEELGFALTPTDCMYVAKCRQGESFTEGKIVPYGDISVSPCSPILNYGQGLFEGLKAYRTEDDRILIFRPHQNAFRMQDGAERLCMASPSVEHFVEAVKQTVNANKKWVPPPGKGALYLRPLLIGSGASLGVAPSPEYTFLIYASPVGDYHKGSSGLNLKVDHKHHRAHSGGTGGVKSCTNYSPIVKSLVEAKSSGFSDVLFLDAATGRNIEEASACNIFIVKGNIVSTPPTSGTILPGITRKSITELVLDIGYQIQERDVSVDELLEAEEVFCTGTAVVVKAVETVTFHDKKVKYRTGEEALSKKLHSMLTSIQTGLVEDKKSWMVDIDPRHG-
	BniB05g000130	ATGAACACTTTTACCTCAAACTCTTCGGATCTCACTTCCACTACAACGCAAACGTTGTCATTCAGGAACATGTATTTCCTCACAACGCTTCAGGCCTTTGTGGCTATAACCTTGGTGATGCTTCTCAAGAAAGTACTGTTCACGGATCCTAATAAAAAGAAACTGTCTCTCCCGCCGGGTCCCACCGGATGGCCGATCATCGGAATGGTTCCAACGATGCTAAAGAGCCGTCCCGTTTTCCGGTGGCTCCACAGCATCATGAAGCAGCTAAACACTGAGATAGCCTGCGTGAGGCTAGGAAACACTCACGTTATCACCGTCACGTGCCCTAAGATAGCACGTGAGATACTCAAGCAACAAGACGCTCTCTTCGCCTCAAGACCTATGACTTACGCACAG…	ATGAACACTTTTACCTCAAACTCTTCGGATCTCACTTCCACTACAACGCAAACGTTGTCATTCAGGAACATGTATTTCCTCACAACGCTTCAGGCCTTTGTGGCTATAACCTTGGTGATGCTTCTCAAGAAAGTACTGTTCACGGATCCTAATAAAAAGAAACTGTCTCTCCCGCCGGGTCCCACCGGATGGCCGATCATCGGAATGGTTCCAACGATGCTAAAGAGCCGTCCCGTTTTCCGGTGGCTCCACAGCATCATGAAGCAGCTAAACACTGAGATAGCCTGCGTGAGGCTAGGAAACACTCACGTTATCACCGTCACGTGCCCTAAGATAGCACGTGAGATACTCAAGCAACAAGACGCTCTCTTCGCCTCAAGACCTATGACTTACGCACAG…	MNTFTSNSSDLTSTTTQTLSFRNMYFLTTLQAFVAITLVMLLKKVLFTDPNKKKLSLPPGPTGWPIIGMVPTMLKSRPVFRWLHSIMKQLNTEIACVRLGNTHVITVTCPKIAREILKQQDALFASRPMTYAQKVLSNGYKTCVITPFGEQFKKMRKVIMTELVCPARHRWLHQKRAEENDHLTAWVYNMVKNSGSVDFRFVTRHYCGNAIKKLMFGTRTFSQNTAPNGGPTAEDIEHMEAMFEALGFTFSFCISDYLPMLTGLDLNGHEKIMRDSSAIMDKYHDPIIDARINMWREGKRTQIEDFLDIFISIKDEEGNPLLTADEIKPTIKELVMAAPDNPSNAVEWAMAEMVNKPEILRKAMEEIDRVVGKERLVQESDIPKLNYVKAILREAFRLH…
	BniB05g000140	ATGGAAGGATTAGCTATCAGAGCATCGAGACCGTCCATTTTCTGCTCTCTTCCAGGTCTCGGCGGCGATCCTCAGCGACGCCCTCCAACTGACGGTTTCCTCAGGTTTCCAGCGTCGTCCAATGCGGCGGATAACACAAAACTAGTCGTGAATTCTAGTTCTTTTCATCCAATCTCCGCCGTCAACGTGTCTACTCAAGCTTCCCTCACCGCCGATTTTCCCGCCCTTTCAGGTACTCCATCAGTTCTCTCTGTCTCATAGTATAGCAAATCCCTCAAAATTTTCAAAACTAAGCTGTCTTGTCTAGTCTGAAGATTTCGAAATTTTGTTTTGTTTTGGTCAGAAACGAATGTGAAAGAGGAGAGGATGAACGGAGAAAAGAAGGCAGACAACATCGTA…	ATGGAAGGATTAGCTATCAGAGCATCGAGACCGTCCATTTTCTGCTCTCTTCCAGGTCTCGGCGGCGATCCTCAGCGACGCCCTCCAACTGACGGTTTCCTCAGGTTTCCAGCGTCGTCCAATGCGGCGGATAACACAAAACTAGTCGTGAATTCTAGTTCTTTTCATCCAATCTCCGCCGTCAACGTGTCTACTCAAGCTTCCCTCACCGCCGATTTTCCCGCCCTTTCAGAAACGAATGTGAAAGAGGAGAGGATGAACGGAGAAAAGAAGGCAGACAACATCGTATGGCACGAGAGTTCCATCTGCAGATGCGACCGACAACAACTTCTTCAACAAAAGGGTTGTGTCATCTGGATCACTGGTCTCAGCGGTTCAGGGAAAAGCACTGTTGCTTGT…	MEGLAIRASRPSIFCSLPGLGGDPQRRPPTDGFLRFPASSNAADNTKLVVNSSSFHPISAVNVSTQASLTADFPALSETNVKEERMNGEKKADNIVWHESSICRCDRQQLLQQKGCVIWITGLSGSGKSTVACALSKALFERGKLTYTLDGDNVRHGLNRDLTFKAEDRTENIRRIGEVAKLFADVGVICIASLISPYRRDRDECRSLLPDGDFVEVFMDVPLSVCESRDPKGLYKLARAGKIKGFTGIDDPYEAPLNCEVVLKHTGDDVSSSPRQMAENIIFYLQNKGYLEG-
	BniB05g001500	ATGTTCTACTTCATCCTTCTCCCTCTCCTTCTCCTCTTGGCTTACAAGTTCCTCTTCTCCAAAACGGAGCGTTTTAACCTCCCGCCTGGTCCACCGTCACGTCCCTTCGTCGGCCATCTCCACCTCATGAAACCACCCATCCACCGTCTCCTCCAACGCTACTCCGACAAATACGGCCCCATCTTCTCCCTCCGTTTCGGCTCCCGCCGCGTCGTGGTGATCACTTCGCCTTCCCTCGCCCAAGAAGCCTTCACCGGCCAAAACGACGTCATCCTCTCCAGCCGGCCGCTCCAGCTCACCGCCAAATACGTCGCCTACAACCACACAACCGTCGGAACCGCTCCTTACGGCGACCACTGGCGCAACCTCCGCCGCATCTGCTCCAACGAGATCCTCTCC…	ATGTTCTACTTCATCCTTCTCCCTCTCCTTCTCCTCTTGGCTTACAAGTTCCTCTTCTCCAAAACGGAGCGTTTTAACCTCCCGCCTGGTCCACCGTCACGTCCCTTCGTCGGCCATCTCCACCTCATGAAACCACCCATCCACCGTCTCCTCCAACGCTACTCCGACAAATACGGCCCCATCTTCTCCCTCCGTTTCGGCTCCCGCCGCGTCGTGGTGATCACTTCGCCTTCCCTCGCCCAAGAAGCCTTCACCGGCCAAAACGACGTCATCCTCTCCAGCCGGCCGCTCCAGCTCACCGCCAAATACGTCGCCTACAACCACACAACCGTCGGAACCGCTCCTTACGGCGACCACTGGCGCAACCTCCGCCGCATCTGCTCCAACGAGATCCTCTCC…	MFYFILLPLLLLLAYKFLFSKTERFNLPPGPPSRPFVGHLHLMKPPIHRLLQRYSDKYGPIFSLRFGSRRVVVITSPSLAQEAFTGQNDVILSSRPLQLTAKYVAYNHTTVGTAPYGDHWRNLRRICSNEILSNNRITNFLHIRKDEIRRMLTRLSRATTHSDDGSRFTHVELEPLLSDLTFNNIVRMVTGKTYYGDDVHNKEEAELFKRLVYDIAVYSGANHTADYLPVLKLFGNKFEKEVKALGKSMDEILQRLLDECRRDKDGNTMVNHLLSLQQQEPEYYTDVIIKGLMMAMMLAGTETSAVTLEWAMTNLVKHPEVLEKARSEIDEKLGKDRLIDEPDVANLPYLQNVVSETFRLFPVAPFLIPRRPTENMKIGGYDVPRDTTVLVNAWAIQRD…
	BniB05g001510	ATGTTATACTTAATCCTCCTCCCTCTCCTACTCCTCGTGGCTTACAAATTCCTCTACACTGAAACGCTCCGTTTCAATCTCCCACCGGGACCACCGTCACGTCCCGTAGTTGGCCATCTCCACCTCATGAAACCGCCCATACACCGTCTCCTCCAAAGCTTTTCTAACAAATATGGCCCTATATTCTCCCTCCGATTCGGCTCCCGCCGCGTGGTGGTCATAGCTTCCTCTGCACTCGTCCAAGAAGCCTTCACCGGCCAAAACGACATCATTCTTTCGAGCCGGCCATTCCAACTCACGGCGAAATACGTCGCTTACAACTACACAACCGTCGGAACCGCTCCTTACGGCGACCACTGGCGTAACCTCCGCCGCATATGCGCCCTCGAGATCCTCTCC…	ATGTTATACTTAATCCTCCTCCCTCTCCTACTCCTCGTGGCTTACAAATTCCTCTACACTGAAACGCTCCGTTTCAATCTCCCACCGGGACCACCGTCACGTCCCGTAGTTGGCCATCTCCACCTCATGAAACCGCCCATACACCGTCTCCTCCAAAGCTTTTCTAACAAATATGGCCCTATATTCTCCCTCCGATTCGGCTCCCGCCGCGTGGTGGTCATAGCTTCCTCTGCACTCGTCCAAGAAGCCTTCACCGGCCAAAACGACATCATTCTTTCGAGCCGGCCATTCCAACTCACGGCGAAATACGTCGCTTACAACTACACAACCGTCGGAACCGCTCCTTACGGCGACCACTGGCGTAACCTCCGCCGCATATGCGCCCTCGAGATCCTCTCC…	MLYLILLPLLLLVAYKFLYTETLRFNLPPGPPSRPVVGHLHLMKPPIHRLLQSFSNKYGPIFSLRFGSRRVVVIASSALVQEAFTGQNDIILSSRPFQLTAKYVAYNYTTVGTAPYGDHWRNLRRICALEILSSNRTTDFLHIRKDEIRLMLARLSRDTHSDDGSRFAQVELEPLFSDLTFNNIVRMVTGKRYYGDDVNNKEEAELFKKLVHDIAMYSGANHSRDYLPVLKLFGNKFEDEVKALGKSMDEILQRLLDDCRRDKDGNTMVTHLLSLQEQEPDYYSDVTIKGLMMAMMLAGTETSAITLEWAMTNLLKHPDVLEKARSEIDEKIGEERLIDELDIAVLPYLQDVVSETFRLFPVAPLLVPRTPTEDMKIGGYDVPRDTIVIVNAWAIHRDP…
	BniB05g001530	ATGTTTTACTATGTGATACTCCCTTTAGCTCTCCTTCTCATTGCTTACAAATTCATCTTCTCTAAAACCAAGCATCTCAACCTCCCTCCCTCTCCGCCTCACTCTCTCCCCATTATCGGCCACCATCGCCTCATCAAACCGCCTGTCCACCGTCTCTTCCACAGTCTCGCCAAAGCACACGGCCCAATATTCTACCTCCGACTAGGTACCCGCCGTGCTGTCGTCATCTCTTCCTTCGCACTCGCAAGAGAATGCTTCACGGGTCATAACGACGTCGTCGTATCAAACCGCCCTCGTTTCCTAACGTCCAAATACATCGCTTACAACTACACAACCATTGCAACCACACCGTACGGTGACCACTGGCGTAACCTCCGAAAAATCTGCTCCCTCGAAATC…	ATGTTTTACTATGTGATACTCCCTTTAGCTCTCCTTCTCATTGCTTACAAATTCATCTTCTCTAAAACCAAGCATCTCAACCTCCCTCCCTCTCCGCCTCACTCTCTCCCCATTATCGGCCACCATCGCCTCATCAAACCGCCTGTCCACCGTCTCTTCCACAGTCTCGCCAAAGCACACGGCCCAATATTCTACCTCCGACTAGGTACCCGCCGTGCTGTCGTCATCTCTTCCTTCGCACTCGCAAGAGAATGCTTCACGGGTCATAACGACGTCGTCGTATCAAACCGCCCTCGTTTCCTAACGTCCAAATACATCGCTTACAACTACACAACCATTGCAACCACACCGTACGGTGACCACTGGCGTAACCTCCGAAAAATCTGCTCCCTCGAAATC…	MFYYVILPLALLLIAYKFIFSKTKHLNLPPSPPHSLPIIGHHRLIKPPVHRLFHSLAKAHGPIFYLRLGTRRAVVISSFALARECFTGHNDVVVSNRPRFLTSKYIAYNYTTIATTPYGDHWRNLRKICSLEIVSSKRLANFLHIRKEEIHRMLTRLSRDALINNEVELESLFYDLTFNNIVRMVTGKIYYGEDASDKAEADTFKKLIAYITSTSGARHPGEYLPFLKIFGRSFEKKVKAVGEAMDAILQRLLDECRGNKDGNTMVNHLLSLQQQDPEYYSEVIIKGLMLGIMFAASETSAVTIEWAMASLLNHPELLEKLKLEIDEKIGQDRLIEETDIPNLPYLQNVVSETLRLYPAAPLLVPRLTVEDIEVGGYDVPRETMVMVNAWSIHRDPELW…
	BniB05g001540	ATGTTTTTCTATGTGATTCTCCCTTTAGCTCTCTTACTCTTGGCTTACAAATTCATATTCACCTCCAAAACGCAGCGTTTCAACCTCCCGCCTTCTCCGCCTTACTCTCTCCCTATCCTCGGCCACCACCACCTCCTCAAACCCCCGGTCCACCGTCTCTTCCAACGCCTCTCAAAAACCCACGGCCCAATATTCTCCCTGAGATTCGGCTCCCGCCGCACCGTCGTGATCTCCTCCTCCTCCCTCGCAACAGAATGCTTCACGGGCCAAAACGACGTTCTTCTATCAAACCGGCCTTGTTTCCTAACCGCTAAATACGTTGCATACAACTACACAACCGTCGGAACCGCTCCTTACGGCGATCACTGGCGTAACCTCCGCCGCATATGCTCCCTCGAA…	ATGTTTTTCTATGTGATTCTCCCTTTAGCTCTCTTACTCTTGGCTTACAAATTCATATTCACCTCCAAAACGCAGCGTTTCAACCTCCCGCCTTCTCCGCCTTACTCTCTCCCTATCCTCGGCCACCACCACCTCCTCAAACCCCCGGTCCACCGTCTCTTCCAACGCCTCTCAAAAACCCACGGCCCAATATTCTCCCTGAGATTCGGCTCCCGCCGCACCGTCGTGATCTCCTCCTCCTCCCTCGCAACAGAATGCTTCACGGGCCAAAACGACGTTCTTCTATCAAACCGGCCTTGTTTCCTAACCGCTAAATACGTTGCATACAACTACACAACCGTCGGAACCGCTCCTTACGGCGATCACTGGCGTAACCTCCGCCGCATATGCTCCCTCGAA…	MFFYVILPLALLLLAYKFIFTSKTQRFNLPPSPPYSLPILGHHHLLKPPVHRLFQRLSKTHGPIFSLRFGSRRTVVISSSSLATECFTGQNDVLLSNRPCFLTAKYVAYNYTTVGTAPYGDHWRNLRRICSLEILSTNRLTNFLHIRKDEIRRMLTRLSREVVNKEIELEPLLSDLTFNNIVRMVTGKRYYGDEVHNEEEANLFKKLVADVNDCSGARHPGDYLPFLKIFGGSFEKKVKAVGEAMDGILQRLLDECRRDKDGNTMVNHLLSLQEQEPEYYTDVTIKGLMLGMMIAGTDTSAVTLEWAMACLLNHPESMEKAKQEIDEKIGQDRLIDEPDLTNLPYLQNIVSETFRLYPAAPLLVPRSPTEDIKVGGYDVPRGTMVMVNAWAIHRDPNLW…
	BniB05g007160	ATGGTTGAGCAGAAAAAGTTCGCTCTGTTTCTAGCGACTCCTGATTCAGAGTTCGTGAAGAAAGAGTACGGAGGATACCACAACGTGTTCGTGTCCACGTTCGGTGACGAAGGAGAGCATTGGGACTCGTTTAGAGTCGTTGAAGGCGAGTTTCCCGACGAGAAAGATCTTGACAAGTACGACGGTTTCGTTATTAGTGGAAGCTCTCACGATTCCTTCGAGAATGATCCTTGGATCCTTAGGCTATGTGAGATCGTCAAGATACTCGATGAGAAGAAGAAGAAAATTCTTGGCATATGCTTTGGTCACCAGGTTCTCTCTTCTTACCGGTCTAACTTTACAATTTGGTCTTAAACCCAACTCTAGAGAAACCATATAATTACTAAAATATTATCATAT…	ATGGTTGAGCAGAAAAAGTTCGCTCTGTTTCTAGCGACTCCTGATTCAGAGTTCGTGAAGAAAGAGTACGGAGGATACCACAACGTGTTCGTGTCCACGTTCGGTGACGAAGGAGAGCATTGGGACTCGTTTAGAGTCGTTGAAGGCGAGTTTCCCGACGAGAAAGATCTTGACAAGTACGACGGTTTCGTTATTAGTGGAAGCTCTCACGATTCCTTCGAGAATGATCCTTGGATCCTTAGGCTATGTGAGATCGTCAAGATACTCGATGAGAAGAAGAAGAAAATTCTTGGCATATGCTTTGGTCACCAGATCATAGCCAGAGTAAGAGGAGGAACAGTGGGAAGAGCAAGGAAGGGACCAGAACTTAAGCTTACAGACATAACCATCGTGAAGGAT…	MVEQKKFALFLATPDSEFVKKEYGGYHNVFVSTFGDEGEHWDSFRVVEGEFPDEKDLDKYDGFVISGSSHDSFENDPWILRLCEIVKILDEKKKKILGICFGHQIIARVRGGTVGRARKGPELKLTDITIVKDAIKPGSFFGNEIPDSIAILKLHQDEVLVLPESAKVLAYSEKYEVEMFSIEDHLFCIQGHPEYNREILHEIVDRVLRLGFIKEDFADAAKASMENRGADRKLLETICKNFLKGRVPAN-
	BniB05g007170	ATGACGGAGGAAAGGGAAAAAACAAGGAAAGGAGTTACCAATGAGACAGAATGTCTGGGGAGACGTCAGCTTCCTTCTGTCCTTGGTAACACTGTTTCTCTCGAAACCTTTTCTGTAGATTTGTTTCATAAATTTAAATAAAAATAATTGGATCTGCATGGAATGGGATTGAGTAAAGAGAAATTTGGCCCCGTAACCATAAAAACTCATAGATTTGTTTCATTTTCTCTCTCCTCTTTTTCTATATTTTTCTAATTCATGGTTAGTTTTTTAATTTTTAAATTTTTTTTGATTATTTCCCCAATTCACCCTTGAATATGATTGGTCTTTCAAGTTTAAAAAAATAAAACTAATTTATCTGTTTATCATAATTAAGAGTGACATGTTGGCGAAGTTGAA…	ATGACGGAGGAAAGGGAAAAAACAAGGAAAGGAGTTACCAATGAGACAGAATGTCTGGGGAGACGTCAGCTTCCTTCTGTCCTTGAAAGAGTACGGAGGATACCACAACGTATTCGTGTCCACGTTCGAGACGAAGGAGAGCATTGGGACTCGTTTGGAGTCGTAGATGGAGAGTTTCCCGACGAGAAAGATCTTGACAAGTATGACGGATTCGTTATAAGCGGAAGCTCTCACGATTCCTTCAAGAGTGATGAGTGGATCCTTACGCTATGTGAGATCGTCAAGAAACTTGACGAGATGAAGAAGAAAGTTCTCGTAAGAGGAGGAACAGTTGGAAGAGCAAGGAAAGGACCTGCAGAACTTAAACTTGTAGACATAACCATTGTGAAGGATGCGACT…	MTEEREKTRKGVTNETECLGRRQLPSVLERVRRIPQRIRVHVRDEGEHWDSFGVVDGEFPDEKDLDKYDGFVISGSSHDSFKSDEWILTLCEIVKKLDEMKKKVLVRGGTVGRARKGPAELKLVDITIVKDATKPGSFFGNNIPDRIAILKLHQDEVLVLPRTSKVLAYSEKYKVEMFSIEDHLFCIQGHPEYNKEILFEIVDRVLRLGRIKQEFADAAKALMENRQADRKILETICKNFLKGKSFNQSRL-
	BniB05g014010	ATGGCGTTATTGTCTCAGGCAGGAGGAGCATACACTGTCCCTTCTGGACACGTAAGCTCCAGGACAGGAACCAAAGCAGTTTCTGGTGGTGTGAATGTGTTGAGGATGAAAGAAGCTTATGCTAGCTCATACTCTAGGACTCTGTCTACCAAATCCATGCTTAAGAGGAGCAAGAGAGGGCATCAGCTGATTGTTGCGGCGAGTCCTCCGACAGAGGAGGCTGTGGTTGCGACTGAGCCGCTTACGAGAGAGGATCTCATTGCTTATCTTGCCTCTGGATGTAAATCAAAGGACAAATGGAGGTACTTTTGTTTTTATTTTGGACTCGTAAAGATTGCTTTTATCTGTTGGATTCCATTTCGTTAACTTGAGGTTCTGAGTTTGCAGGATAGGTACAGA…	ATGGCGTTATTGTCTCAGGCAGGAGGAGCATACACTGTCCCTTCTGGACACGTAAGCTCCAGGACAGGAACCAAAGCAGTTTCTGGTGGTGTGAATGTGTTGAGGATGAAAGAAGCTTATGCTAGCTCATACTCTAGGACTCTGTCTACCAAATCCATGCTTAAGAGGAGCAAGAGAGGGCATCAGCTGATTGTTGCGGCGAGTCCTCCGACAGAGGAGGCTGTGGTTGCGACTGAGCCGCTTACGAGAGAGGATCTCATTGCTTATCTTGCCTCTGGATGTAAATCAAAGGACAAATGGAGGATAGGTACAGAACATGAGAAGTTTGGTTTTGAGGTCAATACTTTACGCCCTATGAAGTATGATCAAATAGCTGAGCTGCTTAACAGTATCGCCGAA…	MALLSQAGGAYTVPSGHVSSRTGTKAVSGGVNVLRMKEAYASSYSRTLSTKSMLKRSKRGHQLIVAASPPTEEAVVATEPLTREDLIAYLASGCKSKDKWRIGTEHEKFGFEVNTLRPMKYDQIAELLNSIAERFEWEKVMEGDKIIGLKQGKQSISLEPGGQFELSGAPLETLHQTCAEVNSHLYQVKAVAEEMGIGFLGMGFQPKWRREDIPIMPKGRYDIMRNYMPKVGSLGLDMMLRTCTVQVNLDFSSEADMIRKFRAGLALQPIATALFANSPFTEGKPNGFLSMRSHIWTDTDKDRTGMLPFVFDDSFGFEQYVDYALDVPMYFAYRNGKYVDCTGMTFRQFLAGKLPCLPGELPTYNDWENHLTTIFPEVRLKRYMEMRGADGGPWRRLCA…
	BniB05g015070	ATGGCACTAGCGATCAACGTTTCTTCATCTTCTTCTTCTACGATCTCAACCTCTAGCTTCCCTTCTTCCGAGCTAAAAGGTATTTTTAGAATTTGCTTAATGGTTCATTGTGAATTTGGGTTAGATTGGTTCAGAATTCGATACTAATTCGAACCCGGTTTGTGTTTGTTCCTCAGTTTCAGCTCCACGTATCGGTTCGGTGAGGTTATCAGATCGTGTCAATGTCTCATCGGCGTCTCTGAGTCTATCCGGGAAACGATCAGCGGTGAAGCCTCTGAATGTGCAGTCAATTTCAAAGGAGTCGTTAGGTTCTATGGTGGCTTCTGGTAAGTTCTGTTTAATTGGGATCTTGGTTTAATCTTTTTTTTTGTTGGTTAAGTTTGATGCTAATGATCTTGT…	ATGGCACTAGCGATCAACGTTTCTTCATCTTCTTCTTCTACGATCTCAACCTCTAGCTTCCCTTCTTCCGAGCTAAAAGTTTCAGCTCCACGTATCGGTTCGGTGAGGTTATCAGATCGTGTCAATGTCTCATCGGCGTCTCTGAGTCTATCCGGGAAACGATCAGCGGTGAAGCCTCTGAATGTGCAGTCAATTTCAAAGGAGTCGTTAGGTTCTATGGTGGCTTCTGAGGTTACAGAGAAGCAAGATGTGGTGGAAGTGGAAGACTTTGAGGAGCTAGCAAGGAGTCTAGAGACTGCTTCTCCTCTTGAGATTATGGACAAGGCTCTCGAGACGTTCGGAAACGACATCGCAATCGCCTTCAGTGGAGCAGAAGACGTTTCTCTCATCGAGTATGCC…	MALAINVSSSSSSTISTSSFPSSELKVSAPRIGSVRLSDRVNVSSASLSLSGKRSAVKPLNVQSISKESLGSMVASEVTEKQDVVEVEDFEELARSLETASPLEIMDKALETFGNDIAIAFSGAEDVSLIEYAHLTGRPFRVFSLDTGRLNPETYRLFDTVEKHYGIRIEYMFPDAVEVQALVRNKGLFSFYEDGHQECCRIRKVRPLRRALKGLRAWITGQRKDQSPGTRSEIPVVQVDPVFEGLDGGAGSLVKWNPVANVEGNDVWNFLRTMDVPVNTLHAAGYVSIGCEPCTRAVLPGQHEREGRWWWEDAKAKECGLHKGNIKESGNGNATANVNGTSSTVADIFKSENVVSLSRQGIENLMKLENRKEAWIVVLYAPWCPFCQAMEASFDELAD…
	BniB05g018490	ATGTCTTCGACGGATGTTCAACCAACCGATCACCACCTCAACCAGTCAACAACAACCGGCACAAACCTCTGGTCGACAACCGAAGACGATGCGTCGGTGATGGAACCTTTCATCGGCTCCGAACACTCTTCTCTCTGGCCTCAACCACCTCCTCCTCCTCCTCACGTCGCCGAAGACACTCTCCAGCAGCGACTCCAAGCTCTAATCGAAGGAGCAAGAGAAAGCTGGACGTACGCCGTGTTCTGGCAGCTATGCCACGACTTCGCCGGAGAAGACAGCAGCGGGGCGCTGCTGAGCTGGGGCGATGGCTACTACAAAGGCGAAGAAGAAGAGAGGAAGTCGAGGAAGAGGAGGAGGTCGAACCCCGTCAGCGCGGCGGAGCAAGAGCATCGGAAGAGA…	ATGTCTTCGACGGATGTTCAACCAACCGATCACCACCTCAACCAGTCAACAACAACCGGCACAAACCTCTGGTCGACAACCGAAGACGATGCGTCGGTGATGGAACCTTTCATCGGCTCCGAACACTCTTCTCTCTGGCCTCAACCACCTCCTCCTCCTCCTCACGTCGCCGAAGACACTCTCCAGCAGCGACTCCAAGCTCTAATCGAAGGAGCAAGAGAAAGCTGGACGTACGCCGTGTTCTGGCAGCTATGCCACGACTTCGCCGGAGAAGACAGCAGCGGGGCGCTGCTGAGCTGGGGCGATGGCTACTACAAAGGCGAAGAAGAAGAGAGGAAGTCGAGGAAGAGGAGGAGGTCGAACCCCGTCAGCGCGGCGGAGCAAGAGCATCGGAAGAGA…	MSSTDVQPTDHHLNQSTTTGTNLWSTTEDDASVMEPFIGSEHSSLWPQPPPPPPHVAEDTLQQRLQALIEGARESWTYAVFWQLCHDFAGEDSSGALLSWGDGYYKGEEEERKSRKRRRSNPVSAAEQEHRKRVIRELNSLISGGGGGGGGTVSGSSDEAGDEDVTDTEWFFLVSMTQSFFVSGSGLPGRAFSDSQTIWLSGSNALAGSSCERARQGQVYGLETMVCIPTENGVVELGSLETIHQSADLVDKVNSFFSFSGGGGGESGSWAINLNPDQGENDPATWINEPNVTGIEPVLGAPGNNNSISSNSDSQTGSKLCNGSSVEHPIKQQQNPQISSCGFVEGDSNKKRCLVSDKVEEMLSFTSVLPLPTKSNDSNYSDLEASVAKGPESGRIVVE…
	BniB05g021220	ATGGCCTCTCGTATTGGTATTGCTAATGATGTGACCGAAGTAAGCTCTCTCTTTCTATCTATTTATTGAGTTTATGTTTCATGTTCATGTAATGATTGACTCTCTTTTTTTCTTCCGACAGTTGATTGGGAACACTCCGTTGGTGTATCTGAACAGTGTTGCTGAAGGATGTGTTGGTCGTGTTGCTGCTAAGCTTGAGATGATGGAACCCTGCTCCAGCGTCAAAGACAGGTTTTCTGTTTTTTTCTTCCCAAATCTTTTTTTATGTTTTTAAGTTTCGGCTTTGAAGTCAACTTTGTATTTTTTTTTTGTTGTGCAGGATTGGTTTTAGCATGATCTCTGATGCAGAGAAAAAGGGTCTGATTAAACCAGGAGAGGTTTGTCTGGAGGATCTTATTT…	ATGGCCTCTCGTATTGGTATTGCTAATGATGTGACCGAATTGATTGGGAACACTCCGTTGGTGTATCTGAACAGTGTTGCTGAAGGATGTGTTGGTCGTGTTGCTGCTAAGCTTGAGATGATGGAACCCTGCTCCAGCGTCAAAGACAGGATTGGTTTTAGCATGATCTCTGATGCAGAGAAAAAGGGTCTGATTAAACCAGGAGAGAGTGTGTTGATTGAGCCAACGAGTGGAAACACCGGAGTTGGGTTGGCATTCACGGCGGCTGCCAAGGGCTACAAGCTTATTATTACCATGCCAGCTTCAATGAGTATTGAGAGAAGAATCATTCTCTTAGCCTTTGGTGTTGAGTTGGTTTTAACTGACCCGGCCAAGGGCATGAAAGGCGCTATCGCAAAG…	MASRIGIANDVTELIGNTPLVYLNSVAEGCVGRVAAKLEMMEPCSSVKDRIGFSMISDAEKKGLIKPGESVLIEPTSGNTGVGLAFTAAAKGYKLIITMPASMSIERRIILLAFGVELVLTDPAKGMKGAIAKAEEILAKTPNGYMLQQFENPANPKIHYETTGPEIWKGTEGKIDGFISGIGTGGTITGAGKYLKEQNPNVKLYGVEPVESAILSGGKPGPHKIQGIGAGFIPNVLETNLIDEVVQVSSDESIDMARLLARKEGLLVGISSGAAAAAAIKLAKRPENAGKLFVAVFPSFGERYLSTVLFDATRKEAESMTFEA-
	BniB05g021440	ATGGCTTCCGTGTCTACCTCCTTCCCCAAAACAACAACTCCTTTCCTCTCCCACCCGCTCGCCAGATCCGATTCCCTACTCGCAACCACCACCGTCTCGTTCCCCTCCAGCTCGAGATCTCGCAGCCTCCTCCGAAGAGCCACCACTCTCCGCGTAGTACGATCCGCGCTGATCGAGCCGGACGGCGGGAAGCTGGTGGAGCTCGTGGTCCCGGAGCCGCGGCGAAGGGAGAAGAAGCACGAGGCGGCGGATTTGCCGAGGGTGAAACTGACGGCGATCGATCTGCAGTGGATGCACGTGCTGAGCGAAGGGTGGGCGAGTCCGCTGAGAGGGTTCATGAGGGAATCCGAGTTCCTTCAAACTCTTCATTTCAATTCGCTTCGTCTCGACGACGGATCC…	ATGGCTTCCGTGTCTACCTCCTTCCCCAAAACAACAACTCCTTTCCTCTCCCACCCGCTCGCCAGATCCGATTCCCTACTCGCAACCACCACCGTCTCGTTCCCCTCCAGCTCGAGATCTCGCAGCCTCCTCCGAAGAGCCACCACTCTCCGCGTAGTACGATCCGCGCTGATCGAGCCGGACGGCGGGAAGCTGGTGGAGCTCGTGGTCCCGGAGCCGCGGCGAAGGGAGAAGAAGCACGAGGCGGCGGATTTGCCGAGGGTGAAACTGACGGCGATCGATCTGCAGTGGATGCACGTGCTGAGCGAAGGGTGGGCGAGTCCGCTGAGAGGGTTCATGAGGGAATCCGAGTTCCTTCAAACTCTTCATTTCAATTCGCTTCGTCTCGACGACGGATCC…	MASVSTSFPKTTTPFLSHPLARSDSLLATTTVSFPSSSRSRSLLRRATTLRVVRSALIEPDGGKLVELVVPEPRRREKKHEAADLPRVKLTAIDLQWMHVLSEGWASPLRGFMRESEFLQTLHFNSLRLDDGSVVNMSVPIVLAIGDEQKALIGESKRVALVDSDDNPIAILSDIEIYKHPKEERIARTWGTTAPGLPYAEEAITNAGNYLIGGDLEVLEPVKYNDGLDRFRLSPLELRKELEKRGADAVFAFQLRNPVHNGHALLMTDTRRRLLEMGYKNPILLLHPLGGFTKADDVPLSWRMKQHEKVLEDGVLDPETTVVSIFPSPMLYAGPTEVQWHAKARINAGANFYIVGRDPAGMGHPVEKRDLYDADHGKKVLSMAPGLERLNILPFRVAA…
	BniB05g024330	ATGGCGGCAGCTTTACAAACGAACACAGGGCTGAATCCGATCAACGTATTCCCAGGAAAATGCAGGTCTCTCACTGATCACTCTCGCTTGCCGAGTAGAGTAAGGTGCGCCGCAGCTTCACCGGGGAAAAAACGGTTTAACATCGCTCTCCTTCCCGGCGACGGGATCGGTCCGGAAGTCATCTCCGTCGCCAAGAACGTGCTTCAGCTAGCTGGATCTCTCGAAGGTTCTGTTTCTCGCTCAGCGTTGTCTTATTCTCTGTGTGTGTTTTGCTTAGACAGTAGCTAACTGAGTCTTTTGATGTATTTGTATTACAGGACTGGAGTTTAATTTCCAGGAGATGCCTGTCGGAGGAGCAGCCTTGGATCTGGTCGGAGTGCCCTTGCCGGAGGAATCCTT…	ATGGCGGCAGCTTTACAAACGAACACAGGGCTGAATCCGATCAACGTATTCCCAGGAAAATGCAGGTCTCTCACTGATCACTCTCGCTTGCCGAGTAGAGTAAGGTGCGCCGCAGCTTCACCGGGGAAAAAACGGTTTAACATCGCTCTCCTTCCCGGCGACGGGATCGGTCCGGAAGTCATCTCCGTCGCCAAGAACGTGCTTCAGCTAGCTGGATCTCTCGAAGGACTGGAGTTTAATTTCCAGGAGATGCCTGTCGGAGGAGCAGCCTTGGATCTGGTCGGAGTGCCCTTGCCGGAGGAATCCTTCACAGCTGCAAAACAATCTGATGCCATACTTCTTGGAGCTATCGGAGGGTACAAATGGGACAGCAATGAAAAACATCTGAGACCAGAGATG…	MAAALQTNTGLNPINVFPGKCRSLTDHSRLPSRVRCAAASPGKKRFNIALLPGDGIGPEVISVAKNVLQLAGSLEGLEFNFQEMPVGGAALDLVGVPLPEESFTAAKQSDAILLGAIGGYKWDSNEKHLRPEMALFYLRRDLKVFANLRPASVLPQLVDASTLKREVAEGVDMMIVRELTGGIYFGEPRGIKTNENGEEVGFNTEFYAAHEIDRIARVAFETARKRRGKLCSVDKANVLDASILWRKRVTALASEYPDVELTHMYVDNAAMQLIRDPKQFDTIVTNNIFGDILSDEASMITGSIGMLPSASLGVSGPGLFEPIHGSAPDIAGQDKANPLATILSAAMLLKYGLGQEKAAKRIEDAVLDALNKGFRTGDIYSPGNKLVGCKEMGEEVLKS…
	BniB05g026170	ATGCAGGAGCAAGCTACTAGCTCTTTAGCTGCAAGCTCTCTACCATCAAGCAGCGAGAGATCATCAAGCTCGAATCCGCATTTGGAGATCAAAGAAGGTACCTTTCGATCATTCTTTTTCTTGATCTCATCGATTCTCAGCCTCATGCAATTGTTGGTTTCCTTCAGTTAGGACAGTAACTTTTAGTCTGCCCGACAAAAAAAACATCGAGATCCGTGATCTTAAAAAATCTCTCCTTTTGATTTCGTTCAGGAATTGAAAGCGATGAGGAGATACGGCGAGTGCCGGAGTTTGGAGGAGAAGCTATCGGAAAAGAAACCTCTGGATCGGCGAACGGTCAGGACAGAACACAGACAACGGTCGGAGAAGGTCAAAGGAAGCGAGGGAGGACTCCGGCCG…	ATGCAGGAGCAAGCTACTAGCTCTTTAGCTGCAAGCTCTCTACCATCAAGCAGCGAGAGATCATCAAGCTCGAATCCGCATTTGGAGATCAAAGAAGGAATTGAAAGCGATGAGGAGATACGGCGAGTGCCGGAGTTTGGAGGAGAAGCTATCGGAAAAGAAACCTCTGGATCGGCGAACGGTCAGGACAGAACACAGACAACGGTCGGAGAAGGTCAAAGGAAGCGAGGGAGGACTCCGGCCGAGAAAGAGACCAAGCGGCTAAAGAGATTGTTGAGGAACAGAGTGTCAGCACAGCAAGCAAGAGAGAGGAAGAAAGCTTACTTGGGTGAGTTGGAGAACAGAGTGAAAGACTTGGAGAACAAAAACTCTGAACTTGAAGAGAGACTCTCTACTTTG…	MQEQATSSLAASSLPSSSERSSSSNPHLEIKEGIESDEEIRRVPEFGGEAIGKETSGSANGQDRTQTTVGEGQRKRGRTPAEKETKRLKRLLRNRVSAQQARERKKAYLGELENRVKDLENKNSELEERLSTLQNENQMLRQILKNTTGNKRGGGGSNADASL-
	BniB05g029220	ATGAGCTGTTGCCGAACCGCGATTGCTTTTCTTCCAGCATTTAAAGCACATTTCTCTTCCACAGATTACAGCACGATCTGTTTCTTGGCAACAATGCTCGACTCCACAGCATTGCTTGCGTTTATTCTAAGTTTTCTCATCGTTGCACTAACGATGAAGAAGCGTAGAGATTCGGAGAAAAATGTGTTAATGACTTCCTACACAAGAAAACTCCTTCTCCCTCCCGGTCCAAAACCTTGGCCTTTTATCGGAAACCTACCAGAGATACTATGGAGGAAGAAACCGGTGTTCCGGTGGATACATGCCATCATGGAAGAACTCAATACCGATATTGCATGTATCCGTCTCGCCAATACTCACGTGATTTCCGTGACATCCCCGCGGATTGCACGAGAGATT…	ATGAGCTGTTGCCGAACCGCGATTGCTTTTCTTCCAGCATTTAAAGCACATTTCTCTTCCACAGATTACAGCACGATCTGTTTCTTGGCAACAATGCTCGACTCCACAGCATTGCTTGCGTTTATTCTAAGTTTTCTCATCGTTGCACTAACGATGAAGAAGCGTAGAGATTCGGAGAAAAATGTGTTAATGACTTCCTACACAAGAAAACTCCTTCTCCCTCCCGGTCCAAAACCTTGGCCTTTTATCGGAAACCTACCAGAGATACTATGGAGGAAGAAACCGGTGTTCCGGTGGATACATGCCATCATGGAAGAACTCAATACCGATATTGCATGTATCCGTCTCGCCAATACTCACGTGATTTCCGTGACATCCCCGCGGATTGCACGAGAGATT…	MSCCRTAIAFLPAFKAHFSSTDYSTICFLATMLDSTALLAFILSFLIVALTMKKRRDSEKNVLMTSYTRKLLLPPGPKPWPFIGNLPEILWRKKPVFRWIHAIMEELNTDIACIRLANTHVISVTSPRIAREILKKQDSIFATRPLTMGTEYCSRGYLTIAVEPQGEQWKKMRRVVASHVTNQKSFKWTLEKRTEEADNLVRYINNLCVKNQGNGFEVIDLRLAVRQYSGNVARKMLFGVRHFGKGSEDGYGSGFEEIEHVDSLFTVVTHIYAFALSDYVPWLRFLDLEGHEKVVSGAMRNLSKYNDSFVDQRLRQWRDGNMKEPQDFLDMFILAKDTNGKPALSDEEIKAQVTELMLATVDNPSNAAEWAMAEMINQPSIMQKAVEEIDRVVGKDRFV…
	BniB05g033180	ATGGCCAAGACTAATCCGCCGGACGGAGGAGGGTCCGATGCAAATGACAATACATTCGTTCGTCACAGAGTGGCACGTCCTCCGAAGGAGGGTTTGCTAAAGGAGTTCAAGTCGGTGGTTCAAGAAACTTTCTTCCACGATGCGCCTCTGAGGGATTTTAAGGACCAAACAGCATCTAAGAAGGTGTTGCTCGGGATCCAAGCTGTCTTCCCAATCATTGGATGGGCCAGAGAGTACAATCTTCGAAAACTTAGAGGAGATGTCATTTCTGGTCTCACCATTGCCAGTCTTTGTATCCCTCAGGTTTACTATTTAAGACACCATTTTTCTTTTATAAAGTCTACGTGCATTTTTGTGCGTTTCTTCCTTTTATACATCATATGTATGTTTCATGGATGA…	ATGGCCAAGACTAATCCGCCGGACGGAGGAGGGTCCGATGCAAATGACAATACATTCGTTCGTCACAGAGTGGCACGTCCTCCGAAGGAGGGTTTGCTAAAGGAGTTCAAGTCGGTGGTTCAAGAAACTTTCTTCCACGATGCGCCTCTGAGGGATTTTAAGGACCAAACAGCATCTAAGAAGGTGTTGCTCGGGATCCAAGCTGTCTTCCCAATCATTGGATGGGCCAGAGAGTACAATCTTCGAAAACTTAGAGGAGATGTCATTTCTGGTCTCACCATTGCCAGTCTTTGTATCCCTCAGGATATTGGATATGCAAAGCTCGCGAATTTGGATCCAAAATATGGACTTTATTCGAGCTTCGTGCCACCACTGGTGTACGCGGGCATGGGGAGTTCT…	MAKTNPPDGGGSDANDNTFVRHRVARPPKEGLLKEFKSVVQETFFHDAPLRDFKDQTASKKVLLGIQAVFPIIGWAREYNLRKLRGDVISGLTIASLCIPQDIGYAKLANLDPKYGLYSSFVPPLVYAGMGSSRDIAIGPVAVVSLLLGTLCQAVIDPNENPAEYLRLAFTATFFAGVFEAGLGFLRLGFLIDFLSHAAVVGFMGGAAITIALQQLKGFLGIKKFTKHTDIVSVMQSVFAAARHGGKKNKKLFWVPAIAPLISVVVSTFFVFITRADKQGVQIVRHIDQGINPISVSKLYFSGKFFTEGIRIGAVAGMVALTEAVAIARTFAAMKDYQIDGNKEMIALGTMNVVGSLTSCYIATGSFSRSAVNYMAGCHTAVSNIVMAIVVALTLVFIT…
	BniB05g034690	ATGGTGTGGGTCCGCCTCTCCTGCACTGTTCTCATGTCTCCTGGATCTGACCCGACTCTGTGGCAACGACCCGATTCGTTTGGTCGGTTCGGGAAGTTTTGGTGGCAAGTACGTCCCCGAAACGCTAATTCACGCGCTCTCTGAGCTCGAATCGACGTTTCTTTTTCTCGCCACCGACGTTGATTTCCAGGTTTGTGGGCTCTGTTTCTTACACCTTGTTCTTCGTGATTGGAATAGAAAGGAAACATTTTGCGATGTGGGTCGTTGGGATCATAGCGTTAGCGTCTCAGATTGAGATCAAAGTTTGGATCTTGCTTTGGTGTTCTTGTTCGGTTTCTCTCTGCTCTGTGGGCTCTGTTTTCAGGCTTGTGGGCTCTGTTTTCAGGCTTGTAGGCTCTG…	ATGGTGTGGGTCCGCCTCTCCTGCACTGTTCTCATGTCTCCTGGATCTGACCCGACTCTGTGGCAACGACCCGATTCGTTTGGTCGGTTCGGGAAGTTTTGGTGGCAAGCTTGTGGGCTCTGTTTTCAGGCTTGTAGGCTCTGTTTCTTAGACCTTGTTTTTTATGACTGGGATAGAAAGGAAACATTTTGCGATGTGGGTCTTGAGGCCCTTCTCACCAAGCGTTTGGGGAAGAAGAGGATTATCGCTGAGGCGGGAGCTGGTCAACACGGTGTGGCTACAGCCACAGTGTGTGCCCGTTTTGGTCTTCAGTGCATTATCTACATGGGTGCTCAAGATATGGTGAGGCAAGCACTTAACGTCTTCAGAATGCGGCTTCTTGGTGCCGAAAGACAAGCA…	MVWVRLSCTVLMSPGSDPTLWQRPDSFGRFGKFWWQACGLCFQACRLCFLDLVFYDWDRKETFCDVGLEALLTKRLGKKRIIAEAGAGQHGVATATVCARFGLQCIIYMGAQDMVRQALNVFRMRLLGAERQALEKWGGKPDVLVACVGGGSNAMGLFHEFVDDTEVRMIGVEAAGFGLDSGKHAATLTKGDVGVLHGAMSYLLQDDDGQIIEPHSISAGLDYPGVGPEHSFLKDMGRTEYYSVTDEEALEAFKRVSRLEGIIPALETSHALAQLEKLCPTLADGTRVVLNFSGRGDKDVQTVAKYLEV
	BniB05g036790	ATGGATTACGTTGTGATTTTGTTGCCATTCGTATTGCTTATTCTAGCTTACAAATTCCTATTCTCATCCAAAACGCAGAGTTTCAGTCTCCCACCAGGACCAACTCCGTTTCCCATCGTCGGCAATCTCCACCTCGTGAAACCGCCTGTACACCGTCTCTTCCGTCGCTTCGCTGAAAAATACGGTGACATCTTCTCCCTCCGTTACGGCTCTCGCCAAGTCGTCGTGATTTCTTCTTTGCCCCTCGTTAAAGAATGCTTCACTGGTCAAAACGATATCATTCTAACTAACCGGCCACATTTTCTGACGGCTAAGTACGTCGCCTACGACTACACCACGGTTGGAACCGCCCCTTACGGCGACCATTGGCGTAATCTCCGCCGTATATGCTCCCTTGAG…	ATGGATTACGTTGTGATTTTGTTGCCATTCGTATTGCTTATTCTAGCTTACAAATTCCTATTCTCATCCAAAACGCAGAGTTTCAGTCTCCCACCAGGACCAACTCCGTTTCCCATCGTCGGCAATCTCCACCTCGTGAAACCGCCTGTACACCGTCTCTTCCGTCGCTTCGCTGAAAAATACGGTGACATCTTCTCCCTCCGTTACGGCTCTCGCCAAGTCGTCGTGATTTCTTCTTTGCCCCTCGTTAAAGAATGCTTCACTGGTCAAAACGATATCATTCTAACTAACCGGCCACATTTTCTGACGGCTAAGTACGTCGCCTACGACTACACCACGGTTGGAACCGCCCCTTACGGCGACCATTGGCGTAATCTCCGCCGTATATGCTCCCTTGAG…	MDYVVILLPFVLLILAYKFLFSSKTQSFSLPPGPTPFPIVGNLHLVKPPVHRLFRRFAEKYGDIFSLRYGSRQVVVISSLPLVKECFTGQNDIILTNRPHFLTAKYVAYDYTTVGTAPYGDHWRNLRRICSLEILSSNRLTGFLSVRSDEIRRLLTKLSRDYNGRIVELEPLLADLTFNNIVRMVTGRRYYGDQVHNKEEANLFKKLVTQINDNSGASHQGDYLPILKVFGHSYEKKVKALGEAMDSFLQRLLDDCRRDGESNTMLSHLLSLQQEQPKYYSDVIIKGLMLSMMLAGTDTSAVTLEWAMASLLKNPEVLKKAKAEIDDKIGQEHLVDEPDIVNLPYLQNIVLETFRLCPAAPLLVPRSPSEDIKIGGYDVPCGTIVLVNSWSIHRDPKLW…
	BniB05g048020	ATGGAGAGAGCTACATTTTCCCCGAGTCTTAATCAAAGTTACCTACTTTCTCCTTCACGCGCCTCCAACACGCGCCTCCACTCTTTCTCCTTGACTCGGAACTTATCGCCATCGTCTTCCTCCATCAAGGTCAACTCTTTTTCATTCCCTTTTTCTCCACTCTTCGTTCGATTGCATCTGACCTCATTTCTCGATTGTGTTATTATTCACAGCTTCAGCATTCTTCTTCCCCCGTCTCTTCAAGTTTCATCATCAATGGCGGAGCCTCCCTTGCTCGGTGCAACGCCGTCCTGTCAAACTCTTCTTCCAGGTTCGTTTTGAATCACAATCAAATTCTCTTATTTGACTTTATTTTCTTATTGGTTTTTGATTAGATTGGTTTTATATATGGAATAGTAA…	ATGGAGAGAGCTACATTTTCCCCGAGTCTTAATCAAAGTTACCTACTTTCTCCTTCACGCGCCTCCAACACGCGCCTCCACTCTTTCTCCTTGACTCGGAACTTATCGCCATCGTCTTCCTCCATCAAGCTTCAGCATTCTTCTTCCCCCGTCTCTTCAAGTTTCATCATCAATGGCGGAGCCTCCCTTGCTCGGTGCAACGCCGTCCTGTCAAACTCTTCTTCCAGTAAGGATGTTTCTCAAGTAGCCGACATAGATTGGGACAACATCGGGTTCGGTCTTAAGCCCACTGATTACATGTACGTCATGAAATGTAACCTTGGTGGTGAGTTCTCAAATGGTGAGTTGCAACGTTTTGGGAACATTGAAGTCAGCCCATCTGCTGGTGTACTCAACTAC…	MERATFSPSLNQSYLLSPSRASNTRLHSFSLTRNLSPSSSSIKLQHSSSPVSSSFIINGGASLARCNAVLSNSSSSKDVSQVADIDWDNIGFGLKPTDYMYVMKCNLGGEFSNGELQRFGNIEVSPSAGVLNYGQGLFEGMKAYRKQDGENILLFRPEENATRMRSGAERMCMPAPTIDQFVEAVKTTVLANKRWVPPPGKGSLYIRPLLMGTGAVLGLAPAPEYTFLIYVSPVGNYFKEGVSPINLIVESEFHRATPGGTGGVKTIGNYAAVLKAQAVAKAKGYSDVLYLDCIYKRYLEEVSSCNIFIVKDNVVSTPEIRGTILPGITRKSIVDVARSQGLKVEERNVTVDELLEADEVFCTGTAVVVSPVGSITYKGKRVSYGEGSFGPVSEKLYTV…
	BniB05g052360	ATGGAGAGAAAGCCCTTTGAGGTTGAGACGACGGAAGATCACAAACCCTACTCCGCCTTCGATGGTGGTGGTTCTGATTTAACGTCGACGGTTGATTCATCTGACGATGAGCAGAAAAAGCTCGTTTATAGAGGCTGGAAAGTCATGCCTTATATCATTGGTAACGCTTCTCTCTCTCTCTCTAGACCGTTATTTTTAAACTCTGTTTTTTTTTTTGGGTCAACTAACTCTGTTTTTTTGTGCAACAGAACATTTTTTCCGTGATGGTTATTTTTAATCATTTTATAATTTATTTATTTATTTATTTATTTTTTATCTGCTTCACGTTGGCTTAACTGTGTCAGTATTCTAGAAAATCTACTAGATGTAGAGATAAAAATGTTACAATTGTGTTCTTGA…	ATGGAGAGAAAGCCCTTTGAGGTTGAGACGACGGAAGATCACAAACCCTACTCCGCCTTCGATGGTGGTGGTTCTGATTTAACGTCGACGGTTGATTCATCTGACGATGAGCAGAAAAAGCTCGTTTATAGAGGCTGGAAAGTCATGCCTTATATCATTGGTAATGAGACATTTGAGAAGATTGGGATCATTGGGACGTTATCAAACCTTCTTGTGTACCTAACTCAAGTATTCAACCTTAAGAAATACACAGCTGCAACTATTATCAATGCCTTTAGTGGCACTATCAACTTCGGCACTTTCCTCGCTGCTTTTCTGTGTGACACTTACTTTGGTCGCTACAAGACTCTCAGTGTTTCTGTCATCGCTTGTTTTCTGGGATCGCTTTGTATACTACTG…	MERKPFEVETTEDHKPYSAFDGGGSDLTSTVDSSDDEQKKLVYRGWKVMPYIIGNETFEKIGIIGTLSNLLVYLTQVFNLKKYTAATIINAFSGTINFGTFLAAFLCDTYFGRYKTLSVSVIACFLGSLCILLTAAVPGLHPTPCGTKSSCQGPNGGQIVFLLMGLSLLVVGAGGIRPCNLAFGADQFNPKSESGKKGINSFFNWYFFTFTFAQIISLTLVVYIQSNVSWTIGLSIPVGLMFLACIIYFAGHNLYVKVKASGSPLAGIARVIAAAIKKRGLKPVKKPCSDLYNHIPLNYANSTLKYSDQFRFLDKAAVMTPEDKLKPDGTASDPWNLCTMQQVEEVKCIVRVIPIWFACAVYYLAITLQMTYPVFQALQSDRRLGSGGFKIPSATYVVF…
	BniB05g055400	ATGGCTTCTTCACTTCTGACATACTCCATTATGATCCCAACCACCGGTTCCACGGTGGTTGTCCGGTCAGTATTACCCATTGGATCTTCCCTGCCCTCTCTCCACCGAACTTGTCCGCACAAGAAGCCAACCTTGTTCGTCTCATGTTGCTCCTATGTGTCTAAAAAGGCGGCAACAAGTAGTAGTGACCTCAAACTCGTCATGGGACGGTGGCCAGAGTACATACCGAACAAGCTACCCGACAAGAATTATGTGAGAACGTTCGACACAACGCTCCGTGATGGCGAACAATCTCCCGGTGGAGCTCTTACTCCACTTCAGAAGTTAGAGATTGCTAGGCAACTCGCTAAACTTCGAGTAGACGTCATGGATGTTGGTTTTCCGGCCTCGTCTCAGGAA…	ATGGCTTCTTCACTTCTGACATACTCCATTATGATCCCAACCACCGGTTCCACGGTGGTTGTCCGGTCAGTATTACCCATTGGATCTTCCCTGCCCTCTCTCCACCGAACTTGTCCGCACAAGAAGCCAACCTTGTTCGTCTCATGTTGCTCCTATGTGTCTAAAAAGGCGGCAACAAGTAGTAGTGACCTCAAACTCGTCATGGGACGGTGGCCAGAGTACATACCGAACAAGCTACCCGACAAGAATTATGTGAGAACGTTCGACACAACGCTCCGTGATGGCGAACAATCTCCCGGTGGAGCTCTTACTCCACTTCAGAAGTTAGAGATTGCTAGGCAACTCGCTAAACTTCGAGTAGACGTCATGGATGTTGGTTTTCCGGCCTCGTCTCAGGAA…	MASSLLTYSIMIPTTGSTVVVRSVLPIGSSLPSLHRTCPHKKPTLFVSCCSYVSKKAATSSSDLKLVMGRWPEYIPNKLPDKNYVRTFDTTLRDGEQSPGGALTPLQKLEIARQLAKLRVDVMDVGFPASSQEELEAVKTISKTVGNEVDEETGYVPVICVIARCKHKDIEAAWEALKYAKRPRIFIFICTSDIHMKYKLKRTKEEVIEMARSSIRFAKRIGFSDIQFGCEDGGRSDKDFLCKIMGEAIKEGASTVTLADTVGNNIPQEFGEMVTYLKANTPGIDDVVFSLHCHNDLGLATANTISVQEYSSLYVQPHKPIVGANCFVHESGIHQDGILKYRSTYEIFSPQEIGVERSQDYGIVLGKLSWDMRSVMRNSTIFSHDSGS-
	BniB05g055540	ATGGGTTCAGACAGTACTCCTCAACTTCCAGTGATCTATCTCTCGGACCAAACCCTAAAACCAGGAAGTGAGAAGTGGGTTGAAGTGAGGAGTGATGTCCGTAAAGCTCTTGAAGACTACGGCGCTTTCGAGGTGTCATATGATAGAGTGTCAGAGGAGCTTAAGGAATCGGTTTTGGAAGCCATGAAAGAGCTTTTCGACTTACCAGTTGAGGCTAAGCAGAGAAACGTGTCTCCAAAACCCTACACTGGATATTCTACTCATAATGGTCTCTCCGAGAGTCTAGGGATCCAGGATGCTGAGGTTTTGGAGAAAGTTAACGAGTTTACTCAACTGCTACGTCCTGATTGTGAGGGTAACAAGAGTATCAGGTAAGGTTCTGTTATGTGAAAAGAACAA…	ATGGGTTCAGACAGTACTCCTCAACTTCCAGTGATCTATCTCTCGGACCAAACCCTAAAACCAGGAAGTGAGAAGTGGGTTGAAGTGAGGAGTGATGTCCGTAAAGCTCTTGAAGACTACGGCGCTTTCGAGGTGTCATATGATAGAGTGTCAGAGGAGCTTAAGGAATCGGTTTTGGAAGCCATGAAAGAGCTTTTCGACTTACCAGTTGAGGCTAAGCAGAGAAACGTGTCTCCAAAACCCTACACTGGATATTCTACTCATAATGGTCTCTCCGAGAGTCTAGGGATCCAGGATGCTGAGGTTTTGGAGAAAGTTAACGAGTTTACTCAACTGCTACGTCCTGATTGTGAGGGTAACAAGAGTATCAGCGAAACAATCCAGAAGTTTTCAGAGAAG…	MGSDSTPQLPVIYLSDQTLKPGSEKWVEVRSDVRKALEDYGAFEVSYDRVSEELKESVLEAMKELFDLPVEAKQRNVSPKPYTGYSTHNGLSESLGIQDAEVLEKVNEFTQLLRPDCEGNKSISETIQKFSEKLAELDVMVRRMVMESFGIEKYFDEHLKSTNYRLRLMKYIAPPEVDTNVAVGTNDAGDGANDASASDKANVFAGDEDNVGADTSDIANGIANVHIDDDAKANGDIGADVDAKTSDCANVESKADVSTDVNANSDSNANTGTLSSASVGDIVKANGGADDEEKKLGLPSHTDKNLFTVLYQYEIEGLEVLTKDEKWIRLKPSHNSFVVMAGDSAYALMNGRLFRPFHRVRVTEKKKTRYSIALFSTPNAGNIIEPPKELVDEKHPRVF…
	BniB05g056120	ATGGTGCTCGGATTTGATGCCGAGGTAGTTAAATTTTCTGCCATGTTTCTTATGAAACACGATTATGAGAAAAAAAAAAATTAGAATAGAGTTTCAATGTCCATATTGTTCTTCTCTCATATAAAATCGTTCAGAACAGAATGTTTTATTTATTATCATAGCAATAGCTTAGTATTTATACAAGAAAAATCCCCTAAGTAGATAATGACTCTAAGTCTAAACTTATGACATCATTGTCCTAAGCTATATAGGACTTATCATATTTCTCTTAGGAGTTCTCGGGGAGACCATTCAGAGTGTTTAGCTTGGATACAGGGAGATTAAACCCTGAGACATTTCGGTTTCTCGATGAGGTTGAGAAATACTATGGTCTATGTGATAAGGATTTGAGTATATGTT…	ATGGTGCTCGGATTTGATGCCGAGGAGTTCTCGGGGAGACCATTCAGAGTGTTTAGCTTGGATACAGGGAGATTAAACCCTGAGACATTTCGGTTTCTCGATGAGGTTGAGAAATACTATGGTCTATGTGATAAGGATTTGAGTATATGTTTCCGGACACTGTTGAGGTTCAAAGGTTTGGTTAGGAACAAGGGTTTGTTCTCTTTCTATGAGGATGGTCATCAAGAGTGTTGTCATGTTCGAAAGGTGAGACCTTTGAGGCGTGCACTCAAGGGTCTAAGAGCTTGGATCACTGGTCAGAGCAAAGATCAATCTCCGGGGACAAGTTTGGTGAAGTGGAATCTGGTCGGTAATGTTGAAGGGAACCACGTGTGGAGTTTCTTGAGGACTATGGATCTT…	MVLGFDAEEFSGRPFRVFSLDTGRLNPETFRFLDEVEKYYGLCDKDLSICFRTLLRFKGLVRNKGLFSFYEDGHQECCHVRKVRPLRRALKGLRAWITGQSKDQSPGTSLVKWNLVGNVEGNHVWSFLRTMDLPVNTLHAAGYVSIGCEPCTRCRVSMRGKGGFAGRGVENLMKLENRKEPWIVVPYAPWCSFCQAMEASYDELADKLAGNGVNVAKFRADGD
	BniB05g070840	ATGGGCGGGAACGATCTTGCTATGTCCGTACCAGGCATCAGGTGAGGAAACATTCGAATTCAATTTAAGGTTTTTTTTTTTGGTCTTTCATGCTGTGAATTTAGGATATTATAGGCTTATACTCCTTTCTTGTATTGAGGTGGGTTCGAACTGATGATGACATGATTCCAAAAAATAGTTTTCAACTTTCAATACTCAGAGATGATTTATTTTTGTGGAGTTGAATCAAAGTGTTGTCTCATTCCAAGTTGATGTGTCAATATTAGCTGATAATGGTTAATGTATTGGTATAGGATGGAGAATGAGCCTGACGACTTAGCTAGCGACAATGTAGCGGAAATTGATGTGAGTGATGAAGACATTGATGCGGAAGACCTCGAGAGACGGATGTGGAAGGAT…	ATGGGCGGGAACGATCTTGCTATGTCCGTACCAGGCATCAGGATGGAGAATGAGCCTGACGACTTAGCTAGCGACAATGTAGCGGAAATTGATGTGAGTGATGAAGACATTGATGCGGAAGACCTCGAGAGACGGATGTGGAAGGATCGTGTGCGTCTCAAAAGAATCAAAGAACGAACCAAAAACAATTCTCAAACCAAGGAAGCTCCCAAGAAGATCTCTGACCAAGCACAGAGGAAGAAGATGTCTAGAGCACAAGACGGTATACTCAAGTACATGCTGAAGCTAATGGAAGTCTGCAAAGTCCGCGGCTTCGTGTACGGCATCATACCCGAAAAGGGGAAGCCGGTGAGCGGCTCCTCTGACAATATAAGAGCTTGGTGGAAGGAGAAGGTGAAG…	MGGNDLAMSVPGIRMENEPDDLASDNVAEIDVSDEDIDAEDLERRMWKDRVRLKRIKERTKNNSQTKEAPKKISDQAQRKKMSRAQDGILKYMLKLMEVCKVRGFVYGIIPEKGKPVSGSSDNIRAWWKEKVKFDKNGPAAIAKYEEECSDSQFVLQDLQDATLGSLLSSLMQHCDPPQRKYPLERGTPPPWWPTGDEEWWVKLGLGKSQSPPPYRKPHDLKKMWKVGVLTAVINHMLPDVAKIKRHVRQSKCLQDKMTAKESAIWLAVLNQEESLIQQHSSDNGISNVTEIHRRGDNNAERRKTVVNSDSEYDVDGTEEASGSVTATSQLVRDQDKADKHQRRKRPRFGSEAEQRNIIPDMNHVDAPIIEHNINGTHHHEEGVVAPNIALGAEENGLE…
	BniB05g070970	ATGATCCATCACAAAACCACAACACAAAATCTCTCTCTCTCTCTCTCTCTCTCTCTCTCTCTCTCTCTCTCTCTCTCTCTCTCTCTCTCAAGCTTCATTATCACAATAACGAATCAAGATCCAAGAATGGTACGGACACCATGTTGCAGAGCAGAAGGGTTGAAGAAAGGAGCATGGACTCAAGAAGAAGACCATAAGCTCATTGCCTACGTCCAGCGTCACGGTGAAGGAGGCTGGCGAACCCTTCCTGATAAAGCTGGTATGCCTTTTTTATTTTTAAAACTTCAAATTTCTTCGTCAACAATATGTAATGTGGTCTAACGGTACGTTACACCATCGTTGTCCCTTGAGTCTTGGGTTCGAATCTCCAAATTGTATGTTTTCAGTTTCAAAAAAAAA…	ATGATCCATCACAAAACCACAACACAAAATCTCTCTCTCTCTCTCTCTCTCTCTCTCTCTCTCTCTCTCTCTCTCTCTCTCTCTCTCTCAAGCTTCATTATCACAATAACGAATCAAGATCCAAGAATGGTACGGACACCATGTTGCAGAGCAGAAGGGTTGAAGAAAGGAGCATGGACTCAAGAAGAAGACCATAAGCTCATTGCCTACGTCCAGCGTCACGGTGAAGGAGGCTGGCGAACCCTTCCTGATAAAGCTGGACTCAAAAGATGTGGCAAAAGCTGCAGATTGAGATGGGCCAATTACCTTAGACCTGACATTAAGCGTGGTGAGTTTAGCCAAGAGGATGAAGATTCCATCATAAGTCTCCATGCTATTCATGGCAACAAATGGTCGGCG…	MIHHKTTTQNLSLSLSLSLSLSLSLSLSLSSFIITITNQDPRMVRTPCCRAEGLKKGAWTQEEDHKLIAYVQRHGEGGWRTLPDKAGLKRCGKSCRLRWANYLRPDIKRGEFSQEDEDSIISLHAIHGNKWSAIARRIPGRTDNEIKNHWNTHLKKRLVKKGIDPLTHKSLNGKSSDHPETLPDKGSVHQHDDDQKSNKNNAVGSLSARFLNRVANRFGKRINHSVLSDIIGRGGPFTSHTTPTTSASECEKSSSTFSTPNSLGLLINENTILDATSLSSSTFSSDIYDPLMYDHIFDDIEDMTAFSSRFLNNDVSHDGEDFLMLDESWLESSSFMRELTMILQEDKIETTVFNDSHVTSISEVDDSFEGIDNYFG-
	BniB05g070980	ATGGAACCAACCACGACCCAGAACGGATCCGAACCCGAACTCTCGGAGTTCGAGAAGACCCAGAAGAAGTACCAAGACTTCATCTCTTCCCTCCCAAAGACCAAAGGCTGGAGACCCAAAGAGATCCTAACCCAACACGACGGACACTGGTGGCAAGAATGTCTCCTCGAAGGCCTCCTCCACGCCAAAGACCATTTCCAAGCCCGACCCACAGACTTCCTCGTCTGCAGCTACCCGAAAACCGGCACCACCTGGCTCAAAGCCCTGACGTACGCCATCGTCAACCGCTCTCGTTTCGACGACGCCACCAACCCTCTCCTCAAACGTAACCCTCACGAGTTCGTGCCTTACGTGGAGATAGACTTCGCGTTTTACCCGACCGTCGACGTCCTCCAAGAC…	ATGGAACCAACCACGACCCAGAACGGATCCGAACCCGAACTCTCGGAGTTCGAGAAGACCCAGAAGAAGTACCAAGACTTCATCTCTTCCCTCCCAAAGACCAAAGGCTGGAGACCCAAAGAGATCCTAACCCAACACGACGGACACTGGTGGCAAGAATGTCTCCTCGAAGGCCTCCTCCACGCCAAAGACCATTTCCAAGCCCGACCCACAGACTTCCTCGTCTGCAGCTACCCGAAAACCGGCACCACCTGGCTCAAAGCCCTGACGTACGCCATCGTCAACCGCTCTCGTTTCGACGACGCCACCAACCCTCTCCTCAAACGTAACCCTCACGAGTTCGTGCCTTACGTGGAGATAGACTTCGCGTTTTACCCGACCGTCGACGTCCTCCAAGAC…	MEPTTTQNGSEPELSEFEKTQKKYQDFISSLPKTKGWRPKEILTQHDGHWWQECLLEGLLHAKDHFQARPTDFLVCSYPKTGTTWLKALTYAIVNRSRFDDATNPLLKRNPHEFVPYVEIDFAFYPTVDVLQDRQNPLFSTHIPNGSLPESIVDSGCKMVYIWRDPKDTFISMWTFLHKEKSQEGQLASLEESFDMFCKGLSVYGPYLDHVLGYWKAYQENPERILFLRYETMRANPLPFVKRLAEFMGYGFTDEEEERGVAESVVKLCSFETLKNLEANKGDKEREDRPAVYANSAYFRKGKVGDWANYLTPEMAARIDGLVEEKFKDTGLLQHDQ-
	BniB05g074030	ATGTCTGGGAGAGCTCATCCTAATGTAAATCCGGTGACGGATGGTGGAGATCTTCCTATCAAATCGTCGCCTCACCGGCATAAAGTTGGGGTCCCACCGAAGCAAAACATGTTCCATGATTTCATGTACACGTTCAAAGAAACCTTCTTTCATGATGATCCTCTCAGACATTTTAAGGATCAGCCTAAGTCCAAAAAGTTCATGCTCGGTCTTCAATCTGTCTTCCCGGTTTTCGATTGGGGACGTAACTATAATCTCAAGAAGTTCCGTGGTGACCTCATTGCCGGTTTAACTATTGCCAGTCTTTGTATTCCTCAGGTTAAAAGAACTAATATTAATTACACTATTTCCTTGTGTCACAAGTTATCTATATTTTTTACTTTGTATCTCATGTATTTT…	ATGTCTGGGAGAGCTCATCCTAATGTAAATCCGGTGACGGATGGTGGAGATCTTCCTATCAAATCGTCGCCTCACCGGCATAAAGTTGGGGTCCCACCGAAGCAAAACATGTTCCATGATTTCATGTACACGTTCAAAGAAACCTTCTTTCATGATGATCCTCTCAGACATTTTAAGGATCAGCCTAAGTCCAAAAAGTTCATGCTCGGTCTTCAATCTGTCTTCCCGGTTTTCGATTGGGGACGTAACTATAATCTCAAGAAGTTCCGTGGTGACCTCATTGCCGGTTTAACTATTGCCAGTCTTTGTATTCCTCAGGATATTGGATATGCTAAGCTTGCAAATCTGGACCCTAAATACGGTTTATATTCGAGTTTTGTTCCACCGTTGGTGTATGCT…	MSGRAHPNVNPVTDGGDLPIKSSPHRHKVGVPPKQNMFHDFMYTFKETFFHDDPLRHFKDQPKSKKFMLGLQSVFPVFDWGRNYNLKKFRGDLIAGLTIASLCIPQDIGYAKLANLDPKYGLYSSFVPPLVYACMGSSRDIAIGPVAVVSLLLGTLLRAEIDPSTNPDEYLRLAFTATFFAGVTEAALGFFRLGFLIDFLSHAAVVGFMGGAAITIALQQLKGFLGIKKFTKKTDIIAVLDSVFSAAHHGWNWQTILIGASFLTFLLTSKFIGKKSKKLFWIPAVAPLISVIISTFFVYITRADKQGVQIVKHLDKGINPSSFNQIYFSGHYLAKGIRIGVVAGMVALTEAVAIGRTFAAMKDYQIDGNKEMVALGVMNVVGSMSSCYVATGSFSRSAV…
	BniB06g001990	ATGGCGGCGTCTTCTCTCCGATCCGTAAACCCTACACTCTCCCGAACCACCCTAGCACCTCGCACCATCTCCCCTCCCTTCAAATCACCATTCCTCAGATTCCCTCCCACCTCCACCGCCACCTCATTCAACCTCAAACCCCTCGTCACTACTCGCTCCTCCCCATCCTTCGTGACCCGCTCCTCCTCCGCCGCCGCGGCCTCACCGCAAGAGAGAAAAACCTTCCACGGCCTCTGCTACGTCGTCGGCGACAACATCGACACGGACCAGATCATCCCCGCCGAGTTCCTCACCCTCGTCCCCTCCAACCCCGACGAGTACTCGAAGCTCGGCTCCCACGCCCTAACCGGCCTCCCTTCCTCCTCCTACAAAGACCGGTTCGTGGAGCCGGGGGAGACG…	ATGGCGGCGTCTTCTCTCCGATCCGTAAACCCTACACTCTCCCGAACCACCCTAGCACCTCGCACCATCTCCCCTCCCTTCAAATCACCATTCCTCAGATTCCCTCCCACCTCCACCGCCACCTCATTCAACCTCAAACCCCTCGTCACTACTCGCTCCTCCCCATCCTTCGTGACCCGCTCCTCCTCCGCCGCCGCGGCCTCACCGCAAGAGAGAAAAACCTTCCACGGCCTCTGCTACGTCGTCGGCGACAACATCGACACGGACCAGATCATCCCCGCCGAGTTCCTCACCCTCGTCCCCTCCAACCCCGACGAGTACTCGAAGCTCGGCTCCCACGCCCTAACCGGCCTCCCTTCCTCCTCCTACAAAGACCGGTTCGTGGAGCCGGGGGAGACG…	MAASSLRSVNPTLSRTTLAPRTISPPFKSPFLRFPPTSTATSFNLKPLVTTRSSPSFVTRSSSAAAASPQERKTFHGLCYVVGDNIDTDQIIPAEFLTLVPSNPDEYSKLGSHALTGLPSSSYKDRFVEPGETKTRYSIVIGGENFGCGSSREHAPVCLGAAGAKAVVAQSYARIFFRNAVATGEVYPLDAEVRVCEECRTGDVATVELREGGESVLINHTTGKEYRLKAIGDAGPVIDAGGIFAYARKAGMIPSAAA
	BniB06g002000	ATGTTTCCTTTTATAATCTATCTGTCTGCTTCTCTGTTAATCATTCAGACAAACAACTTCAATAATAGATCCAAACACACACAAATGGCGTCTTCTCTACCTACATTTTCCAGAGCTTTACCTTCCTCATCAAGCAAAAATTCTCCCTCCTTCGTTCCCTTCCGTTCTCCTTTCCTCAAAATCAGCAGCTCCACTTCCTTCGTCCCATCTTCTATCTCCCTCTCTTCACGCCGCACATCCTCCATCATCCCACGCGCCACTGCCTCCTCCTCCGACTCTCTGGCCAAAACCACCTTCCACGGTCTCTGCTTCGTCTTGAAAGACAACATAGACACCGACCAGATCATCCCAGCAGACAAAGCCTGCATCTTCCCTTCCAACCAGCAAGAACGTGACGAG…	ATGTTTCCTTTTATAATCTATCTGTCTGCTTCTCTGTTAATCATTCAGACAAACAACTTCAATAATAGATCCAAACACACACAAATGGCGTCTTCTCTACCTACATTTTCCAGAGCTTTACCTTCCTCATCAAGCAAAAATTCTCCCTCCTTCGTTCCCTTCCGTTCTCCTTTCCTCAAAATCAGCAGCTCCACTTCCTTCGTCCCATCTTCTATCTCCCTCTCTTCACGCCGCACATCCTCCATCATCCCACGCGCCACTGCCTCCTCCTCCGACTCTCTGGCCAAAACCACCTTCCACGGTCTCTGCTTCGTCTTGAAAGACAACATAGACACCGACCAGATCATCCCAGCAGACAAAGCCTGCATCTTCCCTTCCAACCAGCAAGAACGTGACGAG…	MFPFIIYLSASLLIIQTNNFNNRSKHTQMASSLPTFSRALPSSSSKNSPSFVPFRSPFLKISSSTSFVPSSISLSSRRTSSIIPRATASSSDSLAKTTFHGLCFVLKDNIDTDQIIPADKACIFPSNQQERDEIASNALSGLPDFHKTRFVEPGEIKSKYSIIIAGENFGCGSSREHAPVCLGAAGAKAVVAQTYARIFFRNSVATGEVFPLESEVRVCDECTTGDTVTIELRDSGGLLTNHTTGKQYKLKAIGDAGPVIDAGGIFAYARKMGMIPSPSVA-
	BniB06g009140	ATGACCAATCCATATAGTTTCACGCTTATGTTTTCCACTACGCTGGTCCTGGCGGCCTTAGCTATACGTTTCTTGAGACCCAAGAAATCAAGAGGTCAACTTCCTCCGGGCCCAGGGGGATGGCCGATCGTTGGAAACTTGTTCCAAATGATCATGAACCGGCCGGCTCATCAGTGGATCCACCGCGTCATGGAAGCTATGAAAACGGAGATAGCTTGCTTCCGTTTTGCCGGCGTCCATGTCATCATCGTAACCTCAAGCGAGATTGCCCGAGAAGTGCTTAGGGAAAAGGACACGGCTCTCGCAGACAGAGCTGAGGCATACTCGATCAAACTCATAAGTCATGGCTACAACGGCGTTAGTTTCTCTTCCTACGGTGAGCGATGGAAGCTAGCGAAG…	ATGACCAATCCATATAGTTTCACGCTTATGTTTTCCACTACGCTGGTCCTGGCGGCCTTAGCTATACGTTTCTTGAGACCCAAGAAATCAAGAGGTCAACTTCCTCCGGGCCCAGGGGGATGGCCGATCGTTGGAAACTTGTTCCAAATGATCATGAACCGGCCGGCTCATCAGTGGATCCACCGCGTCATGGAAGCTATGAAAACGGAGATAGCTTGCTTCCGTTTTGCCGGCGTCCATGTCATCATCGTAACCTCAAGCGAGATTGCCCGAGAAGTGCTTAGGGAAAAGGACACGGCTCTCGCAGACAGAGCTGAGGCATACTCGATCAAACTCATAAGTCATGGCTACAACGGCGTTAGTTTCTCTTCCTACGGTGAGCGATGGAAGCTAGCGAAG…	MTNPYSFTLMFSTTLVLAALAIRFLRPKKSRGQLPPGPGGWPIVGNLFQMIMNRPAHQWIHRVMEAMKTEIACFRFAGVHVIIVTSSEIAREVLREKDTALADRAEAYSIKLISHGYNGVSFSSYGERWKLAKKVMVTKLLSSATLNKTIGDRTVEADNIVTYVYNICQSGSVTKLVNVRDVALTYSHAVMMRMLFGQRHFDKPAKDGGLGPKEKEHVDAVYRALDCLFSFSVADYLPFLRGWNVEGEEKDVREAVDIINRCNDPIIRERMHLWREKGGKETEEDWLDILITQKDDQGMYLFTFEEIRAQCKDVNVATIDNTMNTVEWTIGEMLNHQEILEKATKELNTVVGKDRLIQESDIPQLNYIKACCRESFRLHPPNAFLPPHGAREDTTLAGY…
	BniB06g010940	ATGGAGAGAAAGCCTCTAGAAGTCGAGTCAACGGATCACCAAAAACCTTCCTCCGCCGTTTACGATGGCTCTGTTCCGGCGGTTGATTCTGTTGAGGAAGTAGTTGAGGAGACCAAAGTCGTTTACAGAGGCTGGAAAGTCATGCCCTTTATCATTGGTAACGCAGACTTCTTTTTTAATTTTTTTTTTCTTCCAAGAACCTTTTTTTGGTTGGTTTTCATGTTTCTTTTTTTCGAAATAAATAATCAATAGTAGAAGAAACGAAGAGAAACATCAGTCTTGCTTGAAGAAATGAATATTGGTTTAATCCTTTTTTTTTAATTCGTGAGATTATCTGTGTTGTTGTCATAAGCGTTGACTTATAGTCAAACAATCTTTAAAGAAAAAAAAAAGAGTGAG…	ATGGAGAGAAAGCCTCTAGAAGTCGAGTCAACGGATCACCAAAAACCTTCCTCCGCCGTTTACGATGGCTCTGTTCCGGCGGTTGATTCTGTTGAGGAAGTAGTTGAGGAGACCAAAGTCGTTTACAGAGGCTGGAAAGTCATGCCCTTTATCATTGGAAACGAGACCTTTGAGAAGCTTGGGATCATTGGAACACTATCAAACCTTCTGGTTTATTTAACTGCTGTCTTCAACATGAAGAGTATAACAGCTGCAACAATCATCAATGCATTCAGTGGCACAATCAACTTCGGAACCTTCCTTGCCGCTTTCCTCTGCGACACTTACTTCGGTCGATACAAGACTCTAACCGTCGCTGTCATCGCCTGTTTTCTTGGATCACTTGTGATACTATTAACA…	MERKPLEVESTDHQKPSSAVYDGSVPAVDSVEEVVEETKVVYRGWKVMPFIIGNETFEKLGIIGTLSNLLVYLTAVFNMKSITAATIINAFSGTINFGTFLAAFLCDTYFGRYKTLTVAVIACFLGSLVILLTAAVPQLHPTPCGTAISCIGPSGGQIAFLLLGLGFLVVGAGGIRPCNLAFGADQFNPKSESGKRGIDSFFNWYFFTFTFAQILSLTLIVYVQSNVSWTIGLTIPVVLMFLACVIFFAGDKLYVKIKASGSPLASIAQVIAVAIKKRGLKPTKQPWLNLYNYYPPKYANSKLKYTDQFRFLDKAAILAPEDKLEADGKPADPWKLCTMQQVEEVKCIVRVLPIWFAASIYYLTITQQMTYPVFQALQSDRRLGSRGFVIPAATYVVFL…
	BniB06g018370	ATGGCCTCACTCTCTCAGGTTTCTTTTTTTCTTTGCTACGAAACTACAACGTTCAATTTTATCATCTCTCCCTAAATCAATTTGAATAACAGGTTTTAGTGGAAGATAGATCTAGTGTTAGAGTCTTGACACTAAATAGACCAAAGCAACTGAATGCTCTTAACTCCAACATGGTATTGAATTTCCCCCTTGTTGTTTCTTTCTCTCCCTTCGTACGTGCACTAGTTTACATATTTGTCTTGAATCAATCTTCTATAGATCAATCGGTTGATGCAACTGTTCCTTGCATATGAGGAAGACCCTAATGTGAAGCTCGTCGTCCTAAAGGTAATTTTTATCCTTATCTCTTCCGGTTTGCACACACTAAATATCTTTGCCACAGGGTCAGGGAAGAGCCTT…	ATGGCCTCACTCTCTCAGGTTTTAGTGGAAGATAGATCTAGTGTTAGAGTCTTGACACTAAATAGACCAAAGCAACTGAATGCTCTTAACTCCAACATGGTATTGAATTTCCCCCTTGTTGTTTCTTTCTCTCCCTTCGAAGACCCTAATGTGAAGCTCGTCGTCCTAAAGGGTCAGGGAAGAGCCTTTTGTGTTGGTGGCGATCCTATACCTGTTTTTCGTGACATCGTCATACAAGGATTAGGCAAGTCATGGAGAGTCGGTGCCGATTTCTTCTCAGAACAATACAAGCTCGACTATGTCTTGGCCAAGTATAGCAAAGTTCAGATATCAATTTTAAATGGTATTGTCATGGGAGGCGGTGCTGGTATCTCCGTCCATGGTCGGTTCCGTATTGCA…	MASLSQVLVEDRSSVRVLTLNRPKQLNALNSNMVLNFPLVVSFSPFEDPNVKLVVLKGQGRAFCVGGDPIPVFRDIVIQGLGKSWRVGADFFSEQYKLDYVLAKYSKVQISILNGIVMGGGAGISVHGRFRIATEKTVFAMPETELGLFPDVGASYFLSRLPGFFGEYVGLTGARLDGAEMLACGLATHFVPSSRLTALEADLCKVGSSDPVTFASAILNAYTQHPNLKQHSAFYRQVLDVIDRCFSRRTMEEIISALEREATHEPDEWISTTIRALKKASPTSLKISLRSIREGRFQAVGQCLIRDYRMGCRAVVIDKDRNPKWEPRSLEETKDNMVERYFKRVDEEDGWEDLQLPPRKNSPALIIAKL
	BniB06g018590	ATGACAACAGCAGTCGAGATGGCCTCACACTCTCAGGTCTCTTTTCTCTTGTTTACTACGCATCTACGAAGATCAATTCTTCTCTTCTTGCTCAATCAATTTATTAACAGGTTTTAGTGGAAGATAAATCTATTGTTAGAACCTTGACACTAAACAGACCAAAGCAGATGAACGCTCTGTGTTTGAACATGGTATTGAATTTTTCCCTTGCTGTTAATTTCTTCCTCCCATTCATGCACTAGTTTTACATATTAATGTGGCTTAAATCAATCTTCTCTAGATCACTCGGTTTCTGCAACTGTTCCTCGCATTTGAGGAGGACCCTAGAGTGAAACTCGTCATCCTAAAGGTAATCTCTACCCTTATCTCTTCCAGTTTGCACAAGCTGAGCTATTGCAA…	ATGACAACAGCAGTCGAGATGGCCTCACACTCTCAGGTTTTAGTGGAAGATAAATCTATTGTTAGAACCTTGACACTAAACAGACCAAAGCAGATGAACGCTCTGTGTTTGAACATGATCACTCGGTTTCTGCAACTGTTCCTCGCATTTGAGGAGGACCCTAGAGTGAAACTCGTCATCCTAAAGGGTCAGAGAAAAGCATTTTGTGCTGGTGGCGATGTTCGACCTGTTATTCGTGACATCGTACAAGGACTAGGCAAATGGAGACTCGGTGCTGGTTTCTTCTCAGATCAATACACGCTCAACTATGTCATGGCCACATATAGCAAAATTCAGATTTCAATTATGAATGGTATTGTCATGGGAGGCGGAGCTGGTATCTCCATCCATGGTCGATTT…	MTTAVEMASHSQVLVEDKSIVRTLTLNRPKQMNALCLNMITRFLQLFLAFEEDPRVKLVILKGQRKAFCAGGDVRPVIRDIVQGLGKWRLGAGFFSDQYTLNYVMATYSKIQISIMNGIVMGGGAGISIHGRFRIATEKTVFAMPETELGLFPDVGASYFLSRLPGFFGNKIHVFACRQNIEPISFSHPACLLRLGEYVGLTGARLDGAEMLACGLATHFVPSTV
	BniB06g020830	ATGGGTGAAGCAAAAGGTCACGTACTGTTTTTCCCATATCCATTACAAGGCCACATTAATCCAATGATCCAGCTCGGCAAACGCTTATCCAGAAAAGGACTCACCGTCTCACTCATCATCGCCTCCAACATCCACCGTGAACCATACACCTCTGAGGACTACTCCATCACCGTCCACACCATCCACGACGGTTTCTTGCCAACCGAACACCCTCACGCCAAGATCAAAGATCCTCCACGTTTTAACGAATCTACTGCTCGTAGCCTCACCGATTTCATCTCTAGGTACACGTTCTTTATTTATTTTTTCTGGCAGATTTTGATAGTTTGCTTGCTCTTTTTAAGTGGTCCACAGCTTCATTGAAGTCGCCTAAAACTAATGGTAACATGAAAAATCATG…	ATGGGTGAAGCAAAAGGTCACGTACTGTTTTTCCCATATCCATTACAAGGCCACATTAATCCAATGATCCAGCTCGGCAAACGCTTATCCAGAAAAGGACTCACCGTCTCACTCATCATCGCCTCCAACATCCACCGTGAACCATACACCTCTGAGGACTACTCCATCACCGTCCACACCATCCACGACGGTTTCTTGCCAACCGAACACCCTCACGCCAAGATCAAAGATCCTCCACGTTTTAACGAATCTACTGCTCGTAGCCTCACCGATTTCATCTCTAGGCAGAAGTTATCGAGCAACCCTCCAAAAGCTCTGATCTATGATCCATTCATGCCCTTTGCACTGGACGTTGCCAAGGACTTGGGTCTATACGTAGTGGCCTATTTCACTCAGCCA…	MGEAKGHVLFFPYPLQGHINPMIQLGKRLSRKGLTVSLIIASNIHREPYTSEDYSITVHTIHDGFLPTEHPHAKIKDPPRFNESTARSLTDFISRQKLSSNPPKALIYDPFMPFALDVAKDLGLYVVAYFTQPWLASLIYYHINEGTYDVPDDRHEDPILASFPGFPLLSQNDLPSFACEKGSYPLIFKVVVSQFSNLRQADCILCNTFDQLEPKVVKWMDGQWPVKNIGPVVPSKFLDNRLPEDKDYELGDSKTEPDESVLSWLANKPAKSVVYVAFGTLVALSENQMKETAMAIKQTGYSFLWSVRDSERSKLPSGFVEEASEKDVGLVAKWVPQLEVLAHDSIGCFVTHCGWNSTLEALCLGVPLVGMPQWTDQPTNAKFIEDVWKIGVRVKTDEE…
	BniB06g024230	ATGAAGAGCAGAGTCATCCTCAGCCATAGAGAGAGAAGAGACAAGTATAATTACACACAGATTGAAACCATGGAGAGAAAGCCCTTTGATGTTGAGACAACTGAGGATCACAAACCCTACTCCTCCGTCGTTGACGGTGGTTCTGATTCGGTTGATTCATTTGACGACGAGCAGACAAAGCTCGTTTATAGAGGCTGGAAAGTCATGCCCTTTATCATTGGTAACGCTTTTTTTTTCGTTAATTGTTTTCTCTGTTTCTTCCGTTTCTTTTGTCTTCTTCTTTGACAAAATATCTGCATTGAGATTTTAAAATTATTGAAACTTGGTTTTGTAAAACGAAGATTTGATTGAAACCCATATCAACCATACCGGTTGGAGTGAGAGAGCGTGAATCATGCA…	ATGAAGAGCAGAGTCATCCTCAGCCATAGAGAGAGAAGAGACAAGTATAATTACACACAGATTGAAACCATGGAGAGAAAGCCCTTTGATGTTGAGACAACTGAGGATCACAAACCCTACTCCTCCGTCGTTGACGGTGGTTCTGATTCGGTTGATTCATTTGACGACGAGCAGACAAAGCTCGTTTATAGAGGCTGGAAAGTCATGCCCTTTATCATTGGTAATGAGACATTTGAGAAGATAGGGATCATTGGGACATTATCAAACCTTCTTGTGTACTTAACTTCAGTATTCAACCTTAAGAGCGTTACAGCTGCAACCATCATCAATGCCTTTAGTGGCACTATCAACTTCGGCACTTTCCTCGCTGCTTTCCTCTGCGACACTTACTTTGGTCGC…	MKSRVILSHRERRDKYNYTQIETMERKPFDVETTEDHKPYSSVVDGGSDSVDSFDDEQTKLVYRGWKVMPFIIGNETFEKIGIIGTLSNLLVYLTSVFNLKSVTAATIINAFSGTINFGTFLAAFLCDTYFGRYKTLTVAVIACFLGSLVILLTAAVPSLHPTPCGTQSSCQGPSEGQIAFLLMGLALLVVGAGGIRPCNLAFGADQFNPKSESGKKGINSFFNWYFFTFTFAQIVSLTLVVYIQSNVSWTIGLSIPVGLMFLACVIFFAGHKLYVKVKASGSPLAGIGHVIAAAIKKRGLKPVKQPWIDLFNHIPHNYANSTLKYTDQLRFLDKAAIMTVDDKLNSDGTASDPWKLCTMQQVEEVKCIVRVIPIWFACAIYYLAISMQMTYPVFQALQ…
	BniB06g037540	ATGATTGCTGCCGGAGCTAAATCGATGCTGGGTCTTTCAATTGCATCGCCCAAAGGAGTTCCCGACAGCAATTCGAGATCTGTCGGTGTTCTTCGTGCTTGTGTTTCCATGGAAGGATCCCAAACGATGAGCCATAACAAAAACGGATCTATTCCTGAGCTCAAAGCTGTTAATGGCCACACAGGTAAATTCAAGAACATGTTGGATTGTCTACTTTAGGACAATCTTTCAATGATCTTCACTTTTGATTTGCATTAAGACAAGAATATGTTTGATTTTCTCAACCTCTGTTGTTTTGGATTTAGGACAAAAACAAGGACCGTTGTCTACGGTCGGAAACTCGACGAACATAAAGTGGCATGAGTGTCCTGTTGAGAAAGTTGATAGACAGAGATTGCT…	ATGATTGCTGCCGGAGCTAAATCGATGCTGGGTCTTTCAATTGCATCGCCCAAAGGAGTTCCCGACAGCAATTCGAGATCTGTCGGTGTTCTTCGTGCTTGTGTTTCCATGGAAGGATCCCAAACGATGAGCCATAACAAAAACGGATCTATTCCTGAGCTCAAAGCTGTTAATGGCCACACAGGACAAAAACAAGGACCGTTGTCTACGGTCGGAAACTCGACGAACATAAAGTGGCATGAGTGTCCTGTTGAGAAAGTTGATAGACAGAGATTGCTTGACCAGAAAGGATGTGTGATTTGGGTCACTGGTCTTAGTGGTTCAGGGAAGAGTACATTGGCTTGTGCTTTGAACCATAAGTTGTACCAAAAGGGAAAGCTTTGTTATATTCTTGACGGT…	MIAAGAKSMLGLSIASPKGVPDSNSRSVGVLRACVSMEGSQTMSHNKNGSIPELKAVNGHTGQKQGPLSTVGNSTNIKWHECPVEKVDRQRLLDQKGCVIWVTGLSGSGKSTLACALNHKLYQKGKLCYILDGDNVRHGLNRDLSFKAEDRAENIRRVGEVAKLFADAGIICIASLISPYRRDRDACRTLLPEGDFVEVFMDVSLEVCEARDPKGLYKLARAGKIKGFTGIDDPYEPPLNCEISLGQEGTGTSPIEMAETVVAYLEHKGYLNA-
	BniB06g041700	ATGACAATGATGATGATGAGCCTTACCACATCGTTACCGTACCCTTTTCAAATCCTACTAGTCTTTATCTTGTCCATAGCATCCATCACTTTGCTTGGCCGAATACTATCAAGACCCACAAAAACCAAAGACCGGTCTCGTCAGCTTCCTCCTGGACCACCAGGATGGCCCATCCTCGGCAATTTACCCGAACTAATGAAGACTCGTCCTAGGCACAAATATTTCGAAATTGCCACGAAAGGGCAAAAACCGGAGATCGCGTGTTTCAACTTCGCCGGAACACACACCATCATCATAAACTCGGATGAGATCGCTCGAGAAGCGTTTAAAGAGCGAGACGCCGACTTCGCAGACCGGCCAAATACTTTCAACATGAGAACCATCGGAGGCAATCACAAA…	ATGACAATGATGATGATGAGCCTTACCACATCGTTACCGTACCCTTTTCAAATCCTACTAGTCTTTATCTTGTCCATAGCATCCATCACTTTGCTTGGCCGAATACTATCAAGACCCACAAAAACCAAAGACCGGTCTCGTCAGCTTCCTCCTGGACCACCAGGATGGCCCATCCTCGGCAATTTACCCGAACTAATGAAGACTCGTCCTAGGCACAAATATTTCGAAATTGCCACGAAAGGGCAAAAACCGGAGATCGCGTGTTTCAACTTCGCCGGAACACACACCATCATCATAAACTCGGATGAGATCGCTCGAGAAGCGTTTAAAGAGCGAGACGCCGACTTCGCAGACCGGCCAAATACTTTCAACATGAGAACCATCGGAGGCAATCACAAA…	MTMMMMSLTTSLPYPFQILLVFILSIASITLLGRILSRPTKTKDRSRQLPPGPPGWPILGNLPELMKTRPRHKYFEIATKGQKPEIACFNFAGTHTIIINSDEIAREAFKERDADFADRPNTFNMRTIGGNHKSMGNTPTGEQFMKMKRVITSEIMSVKTLNMLVAARNIEADNLLAYLLSIYKRSETADVREISRNYGYAVTMRMMFGRRHVTKENVFSDEGRLGPAEKDHLDAIFETLNCLPSFSPADYLEKWFLGWNVDGLEERVTVNCNKVRSYNNPIIDERVELWREKGGKAAVEDWIDTFITLKDENGKYYITPDEVKGQCVEFCIAAIDNPANNMEWTLAEMLKNPEILKKALKELDEVVGRDRLVQESDIPNLNYLKACCRETFRVHPSAH…
	BniB06g043020	ATGGTTTTCTCATCCAATTGGTCACAGGTTTCACTTCTTTGATCTTCCATTACTAAATGTTCTCTCTCTCTCTCTCTCTCTCTCTCTCTCTCTTTTTGCAGTTTCTCTCATAAATTCTTCATTGATGTTTTGATTCGTTTTATAGTAATGATTTGATTCATTTCTAAAAGATATTCATATTCTCTTCTTTTCTGTAACCCGCTTTCTTTAAAATCCCAACATCTATATATACATGGTATTTCATTGCTTTATAAATACAAATTATACCAGGATTAAATTTGGGTTTTCTTGGTTCTTGACTCTTTCATTTATTTCAATTTCTTTGATATTTGCAGCCTACGAACTCAAATCATCAACAGCATCAGCTTCGCGAAAATGTAAGTTTAGTGAGTGGCCACG…	ATGGTTTTCTCATCCAATTGGTCACAGCCTACGAACTCAAATCATCAACAGCATCAGCTTCGCGAAAATGTAAGTTTAGTGAGTGGCCACGGACTACTTTCTCCACAACTTCCACCTTACCCACCAAACCCTAACCCTAACCACCACCATGAAGCTGCCTCCAGTGGTCTCCCAGCGAGGCTCGGTGGATCCATGGCTGAGAGAGCGAGGCAGGCCAAAGCTCCTCCGCCTGTGGGAGCCCTAAAGTGTCCTCGATGCGACTCCCTCAACACTAAGTTCTGTTACTACAACAACTACAACCTCACCCAGCCTCGCTACTTCTGCAAGGCTTGCCGCCGTTACTGGACACATGGCGGCGCTCAGAGGAACGTCCCCGTGGGTGGAGGCAGCCGGAGGAAT…	MVFSSNWSQPTNSNHQQHQLRENVSLVSGHGLLSPQLPPYPPNPNPNHHHEAASSGLPARLGGSMAERARQAKAPPPVGALKCPRCDSLNTKFCYYNNYNLTQPRYFCKACRRYWTHGGAQRNVPVGGGSRRNSKKGKNGISKSSSLSKQYSSTVNNAPSSSSGQLRTNHQFPFLPTLHNLTQLGGIGLNLAATNGNNQAHQIGQSLMNDLGFLHVGNGRTGNIHDNNNSGENNLMAAAGSMNQFTLFDPATGLYAFQNDGNIGNNVGISFSSTSMVDSRAYQAAPVKMEEQPSLVNLSRPVSSLTSQGNQTSQFFWNNSDLSGPSSNDHHQLL
	BniB06g046090	ATGATGATGAGTCTGAGAAGAGGAGGAGGAGAGAGACAAGACTATCCGGCAGCGTACAACGTTGTCCATAAGCTACCTCACGGCGACAGTCCTTACGTCCGAGCAAAACATGTTCAGGTAATAAAATAAATAAATATATCTCACTGTAGAGATATTTGTTTTAAGAAAAAATATTGAATTTGATTGATTTGTTTTGGACAGCTTGTGGAGAAGGATGCAGAAGCAGCGATAGAGCTGTTCTGGAGAGCGATCAGAGCGAGAGATAGAGTGGATAGTGCTCTTAAAGACATGGCTTTGCTTATGAAACAACAGAACAGAGCAGACGAAGCCATCGATGCTATTCATTCCTTTAGAGATCTTTGTTCCAGACAAGCTCAGGAATCACTCGACAATGTCCTC…	ATGATGATGAGTCTGAGAAGAGGAGGAGGAGAGAGACAAGACTATCCGGCAGCGTACAACGTTGTCCATAAGCTACCTCACGGCGACAGTCCTTACGTCCGAGCAAAACATGTTCAGCTTGTGGAGAAGGATGCAGAAGCAGCGATAGAGCTGTTCTGGAGAGCGATCAGAGCGAGAGATAGAGTGGATAGTGCTCTTAAAGACATGGCTTTGCTTATGAAACAACAGAACAGAGCAGACGAAGCCATCGATGCTATTCATTCCTTTAGAGATCTTTGTTCCAGACAAGCTCAGGAATCACTCGACAATGTCCTCATCGATCTCTACAAGAAGTGTGGGAGGATAGAAGAGCAAGTTGAGCTATTGAAGCAGAAGCTTTGGATGATATACCAAGGGGAA…	MMMSLRRGGGERQDYPAAYNVVHKLPHGDSPYVRAKHVQLVEKDAEAAIELFWRAIRARDRVDSALKDMALLMKQQNRADEAIDAIHSFRDLCSRQAQESLDNVLIDLYKKCGRIEEQVELLKQKLWMIYQGEAFNGKPTKTARSHGKKFQVTVEKETSRILGNLGWAYMQLKDYTAAETVYRKAQAVEPDANKACNLCTCLIKQGKVDEARMILFRDVLREKKEGFDDDSRLKVRVQELLSELEPRETVVASVSVECGEVGMDEIAVVEGIDEFMKEWRRPLRTRRLPIFEEILPLRDQLAC-
	BniB06g046290	ATGGCGTGTCAAGATTTGGTGTTTGCTGTTAACGGAGAGAAATTTGAAGTCTTTTCAGTTCATCCTTCTACTACTTTGCTTGAGTTCTTGCGTTCCAACACTCCCTTTAAGAGCCTCAAGCTCAGCTGTGGCGAAGGTACACACACACATAGACTTTGTCATTTTTCTAATGAATATTTTGTATCTTTTTCGTGCTTGTATCATGCACTTCTATGTTTGAACCTCAAATTCATGTCTAGAAGCTTCTTCTTGTGCTTATATATGAAGACTATTCCCTTTCTATGAGTTGGAGGATTAAAACTTGTGCATAACTACATGAATATTGGTAATTTTTCGTGGTTTTATTTGGTTTATATGCACTTCTGTTTGAACCTTAAATCATATCCAGATGCTTCTTGT…	ATGGCGTGTCAAGATTTGGTGTTTGCTGTTAACGGAGAGAAATTTGAAGTCTTTTCAGTTCATCCTTCTACTACTTTGCTTGAGTTCTTGCGTTCCAACACTCCCTTTAAGAGCCTCAAGCTCAGCTGTGGCGAAGGTGGTTGTGGTGCTTGCATCGTGATTCTATCAAAATATGATCCAGTGTCAGACAAAGTCGAGGAATATTCCATAAACTCTTGCCTCACCCTTCTTTGCAGCATAAATGGGTGTTCCATAACCACATCCGACGGTCTCGGAAACACCGAAAAAGGTTTCCATCCGATTCACAAAAGATTCGCGGGGTTCCATGCCTCTCAATGTGGTTTTTGTACCCCGGGGATGTGCATCTCTCTCTACTCCGCTCTTTCAAACGCACATAAC…	MACQDLVFAVNGEKFEVFSVHPSTTLLEFLRSNTPFKSLKLSCGEGGCGACIVILSKYDPVSDKVEEYSINSCLTLLCSINGCSITTSDGLGNTEKGFHPIHKRFAGFHASQCGFCTPGMCISLYSALSNAHNSSPPDYLTASAAEKSISGNLCRCTGYRPIADACKSFAADVDIEDLGFNSFWRKGESREEMLKKLPPYNPDKDLVAFPDFLKEKIKRHRNVLDQSRYYWSTPASVEELQAILATTNSGGDLGLVKLVVGNTGTGYYKEVKQYSRYIDISHIQEMSMIKKDDRGIEIGAVVTISKVIDALMDTSAYVFKKIGIHMEKVANHFIRNSGSIGGNLVMAQSKNFPSDITTLLLAADASVHMMNAGRHEKRRIGEFLVSPPIIDTNTVLLKV…
	BniB06g047650	ATGTCTATCAGAAACACGTGTCCTCCAACGGCAATAGAAACCGTAACCGACACTACCGTGCCAAACCATGACGAGACCGGGACAGAGGCAACTGAGTTCGAGAAGAATCGGAAACGGTACCAAGACCTCATCTCCACGTTGCCTCACGTGAAAGGCTGGAGGCCGAAAGATCCACTGATTGAGTACAGTGATCATTGGTTGATACAGCCTATCGTTGAAGGTTCGCTTTACGCGCAAGAGTTCTTCCAAGCACGACCCAGTGACTTCTTCATCTGTAGCTACCTAAAGACAGGTACCACTTGGCTCAAATCAGTAACATTCGTAATAGCCAACCGATCTCGCTTTGATGATTACACGAACCGTCTCCTAAAACGTAACCCTCACGAGCTTATTCCTTTC…	ATGTCTATCAGAAACACGTGTCCTCCAACGGCAATAGAAACCGTAACCGACACTACCGTGCCAAACCATGACGAGACCGGGACAGAGGCAACTGAGTTCGAGAAGAATCGGAAACGGTACCAAGACCTCATCTCCACGTTGCCTCACGTGAAAGGCTGGAGGCCGAAAGATCCACTGATTGAGTACAGTGATCATTGGTTGATACAGCCTATCGTTGAAGGTTCGCTTTACGCGCAAGAGTTCTTCCAAGCACGACCCAGTGACTTCTTCATCTGTAGCTACCTAAAGACAGGTACCACTTGGCTCAAATCAGTAACATTCGTAATAGCCAACCGATCTCGCTTTGATGATTACACGAACCGTCTCCTAAAACGTAACCCTCACGAGCTTATTCCTTTC…	MSIRNTCPPTAIETVTDTTVPNHDETGTEATEFEKNRKRYQDLISTLPHVKGWRPKDPLIEYSDHWLIQPIVEGSLYAQEFFQARPSDFFICSYLKTGTTWLKSVTFVIANRSRFDDYTNRLLKRNPHELIPFIEIEFPLFPQVDGLKDKGNTLFSTHMPYKSLPESVVKTGCKMVYIWRDPKDTFISLWHFFQKKRSESGPLNGLEESFDMFCKGFSAYGPYLDHVLGYWKAHQENPNQILFLKYETLSVDPLPHVKRLAEFMGYGFTAEEEKDGVVEKVVNLCSFETLKNLEANKGDKEREDHPSPFTKSAYFRKGKTGDWENYLTPDMAARMDRIMEDKFKGTGLLENGK-
	BniB06g047660	ATGTCCTCCAATCTTTTTCCTCTAATGGCAACAGAAACCGTAAGCGACACTACCGTGCCAAACCATGACAAGACCGAGACAGAGCCAACTGAGTTCGAGAAGAATCAGAATAGGTACCAAGACCTGATCTCCACGCTTCCTCACGTGGAAGGCTGGAGGCCGAAAGCTCCCTTTATCAGGTACGGTGGTCACTGGTGGATACAGGATGTCCTTGAAGGTTCTCTTTACGCTCGAGAGTTCTTCCAAGCTCGAGCTAGTGACTTCCTCGTCTGTAGCCACATGAAGACAAGTACCACCTGGCTAAAATCACTAACATTCGCAATAGCCAATCGATCTCGCTTCCAAGATTCCACAAACCCTCTCCTAAAACGTAACCCTCACGAGCTTATTCCATTCATT…	ATGTCCTCCAATCTTTTTCCTCTAATGGCAACAGAAACCGTAAGCGACACTACCGTGCCAAACCATGACAAGACCGAGACAGAGCCAACTGAGTTCGAGAAGAATCAGAATAGGTACCAAGACCTGATCTCCACGCTTCCTCACGTGGAAGGCTGGAGGCCGAAAGCTCCCTTTATCAGGTACGGTGGTCACTGGTGGATACAGGATGTCCTTGAAGGTTCTCTTTACGCTCGAGAGTTCTTCCAAGCTCGAGCTAGTGACTTCCTCGTCTGTAGCCACATGAAGACAAGTACCACCTGGCTAAAATCACTAACATTCGCAATAGCCAATCGATCTCGCTTCCAAGATTCCACAAACCCTCTCCTAAAACGTAACCCTCACGAGCTTATTCCATTCATT…	MSSNLFPLMATETVSDTTVPNHDKTETEPTEFEKNQNRYQDLISTLPHVEGWRPKAPFIRYGGHWWIQDVLEGSLYAREFFQARASDFLVCSHMKTSTTWLKSLTFAIANRSRFQDSTNPLLKRNPHELIPFIEIEFPLFPHIDVLLDKGNTLFATHMPHDFLPDSVVKSGCKMVYIWRDPKDTFISLWHFSQKKRSERGVLSGLEESFDKFCKGLSVYGPYLDHVLGYWKADQENPDQILFLKYESLIADPLPHVKRLAEFMGYGFTAKEEKNGVVEKVVNLCSFETLKNLEANKGDKEREDHPSPFTKSSYFRKGKTGDWENYLTPDMAARMDGIMEDKFKGTGLLENGK-
	BniB06g047670	ATGGCAACAGGAGCTGTAACCGACACTACTGTGCCAAACCATGACGAGACCGAGAAAGAGGCAACAGAGTTCGAGAAGAATCGGAAACGATACCAAGACCTGATCTCCACGTTGCCTCACGTGAAAGGATGGAGGCCGAAAGCTCCCTTGATCAGGTACGGTGGTCACTGGTGGGTACAGTCTCTCCTTGAAGGTTCCCTTTATGCGCAAGACTTCTTCCAAGCACGACCCAATGACTTCCTCATTTGTAGCTACCCAAAGTCAGGTTCTACTTGGCTCAAGTCACTAATATTCACAATAGCCAATCGATCTCGCTTCAACGATTCCACGAACCCTCTCTTAAAACATAACCCTCACGAGCTTATTCCTTTCATTGAGATCGAGTTCCCTTATTTCCCT…	ATGGCAACAGGAGCTGTAACCGACACTACTGTGCCAAACCATGACGAGACCGAGAAAGAGGCAACAGAGTTCGAGAAGAATCGGAAACGATACCAAGACCTGATCTCCACGTTGCCTCACGTGAAAGGATGGAGGCCGAAAGCTCCCTTGATCAGGTACGGTGGTCACTGGTGGGTACAGTCTCTCCTTGAAGGTTCCCTTTATGCGCAAGACTTCTTCCAAGCACGACCCAATGACTTCCTCATTTGTAGCTACCCAAAGTCAGGTTCTACTTGGCTCAAGTCACTAATATTCACAATAGCCAATCGATCTCGCTTCAACGATTCCACGAACCCTCTCTTAAAACATAACCCTCACGAGCTTATTCCTTTCATTGAGATCGAGTTCCCTTATTTCCCT…	MATGAVTDTTVPNHDETEKEATEFEKNRKRYQDLISTLPHVKGWRPKAPLIRYGGHWWVQSLLEGSLYAQDFFQARPNDFLICSYPKSGSTWLKSLIFTIANRSRFNDSTNPLLKHNPHELIPFIEIEFPYFPNIDVLQDKRNHLFSTHMPHDFLPDSVVKSGCKMVYIWRDPKDTFISRWSFFQNQRFEHGPLNSLEESFDMFCKGFCAYGPYLDHVLAYWKAHQENPDKILFLKYETLRADPLLYVKKLGKFMGYGFTAEEEKNGVVEKVVNLCSFETLKNLEANKGDKEREDHPSPYTNSAYFRKGKTRDWVNHLTPDMAARMDGIMEEKFKGTGLLENGE-
	BniB06g047680	ATGTCTATCAGAAACACGTGTCGTCCAACGGCAATAGAAACCGTAACCGACACTACCGTGCCAAACCATGACGAGACCGGGACAGAGGCAACAGAGTTCGAGAAGAATCGGAAACGGTACCAAGACCTCATCTCCACGTTGCCTCACGTGAAAGGCTGGAGGCCGAAAGATCCACTGATTGAGTACGGTGATCATTGGTTGATACAGCCTATGGTTGAAGGTTCCCTTTACGCGCAAGAGTTCTTCAAAGCACGACCCAGTGACTTCCTCATATGTAGCTACCCAAAGACAGGTACCACTTGGCTCAAATCACTAACATTCTCAATAGCCAACCGATCTCGCTTCGATGATTCCACAAACCCTCTCCTTAAATGTAACCCTCACGAGCTTATTCCTTTC…	ATGTCTATCAGAAACACGTGTCGTCCAACGGCAATAGAAACCGTAACCGACACTACCGTGCCAAACCATGACGAGACCGGGACAGAGGCAACAGAGTTCGAGAAGAATCGGAAACGGTACCAAGACCTCATCTCCACGTTGCCTCACGTGAAAGGCTGGAGGCCGAAAGATCCACTGATTGAGTACGGTGATCATTGGTTGATACAGCCTATGGTTGAAGGTTCCCTTTACGCGCAAGAGTTCTTCAAAGCACGACCCAGTGACTTCCTCATATGTAGCTACCCAAAGACAGGTACCACTTGGCTCAAATCACTAACATTCTCAATAGCCAACCGATCTCGCTTCGATGATTCCACAAACCCTCTCCTTAAATGTAACCCTCACGAGCTTATTCCTTTC…	MSIRNTCRPTAIETVTDTTVPNHDETGTEATEFEKNRKRYQDLISTLPHVKGWRPKDPLIEYGDHWLIQPMVEGSLYAQEFFKARPSDFLICSYPKTGTTWLKSLTFSIANRSRFDDSTNPLLKCNPHELIPFIEIEFPLFPHIDVLLDKGNTLFSTHMPHDLLPDSIVKSGCKMVYIWRDPKDTFISLWHFFQKNRSESGPLNGLEESFDMFCKGFSAYGPYLDHVLEYWKAHQGNPNQILFLKYETLTEEEKNGVVENIVNLCSFETLKNLEANKGDKERQDHPSPFTKSAYFRKGKTGDWENYLTPYMAARMDGIMEEKFKGTGLLENGK-
	BniB06g050340	ATGGCGAACTCGACGATTCTTCTTGATTACTGGCCAAGCATGTTCTGTATGAGGGCTAGAGTCGCGTTGAGGGAGAAGGGTGTTGTGTTCGAGGCCAGAGAAGAGGATCTCACGAACAAGAGCCCTTTGCTCCTCCAAAGTAATCCGATTCACAAGAAGGTCCCGGTTCTGATCCACAACGGTAAACCCGTAAGCGAGTCTCTCAATGTTGTCCAGTACGTGGACGAGGCTTGGTCTGACAAGAACCCATTCTTCCCTTCTGATCCATACGGGAAAGCTCAAGCTAGGTTTTGGGCTGATTTCGTGGACAAGAAGGTAACCACATCTCTTTTGTGCCCTACATAATTTAATTAAAACTTTCCAATTGTGTTAGGGTTTAGATGATTTTGGGTTAAGTTT…	ATGGCGAACTCGACGATTCTTCTTGATTACTGGCCAAGCATGTTCTGTATGAGGGCTAGAGTCGCGTTGAGGGAGAAGGGTGTTGTGTTCGAGGCCAGAGAAGAGGATCTCACGAACAAGAGCCCTTTGCTCCTCCAAAGTAATCCGATTCACAAGAAGGTCCCGGTTCTGATCCACAACGGTAAACCCGTAAGCGAGTCTCTCAATGTTGTCCAGTACGTGGACGAGGCTTGGTCTGACAAGAACCCATTCTTCCCTTCTGATCCATACGGGAAAGCTCAAGCTAGGTTTTGGGCTGATTTCGTGGACAAGAAGTTTAGTGATGCCCAATTCAAGATATGGGGAAAGAAAGGTGAGGAACAAGCTGCAGGGGTGAAGGAGTTTATTGAGGCATTGAAG…	MANSTILLDYWPSMFCMRARVALREKGVVFEAREEDLTNKSPLLLQSNPIHKKVPVLIHNGKPVSESLNVVQYVDEAWSDKNPFFPSDPYGKAQARFWADFVDKKFSDAQFKIWGKKGEEQAAGVKEFIEALKILEAELGDKPYFGGDSFGYVDISLITFYSWFGAYEKFGNFSIEAESPKLIAWAKRCMEKESVSKSLPDQEKIVAYAAEFRKNNL-
	BniB06g056490	ATGCAGCCTGAATTCTCAGATCTTTCCCAAGTAAGTTTTACGTTTAAATAAATTTCATAATAAATGTAAATTCATCAGTATAAATAATACATCATTGAAAACGAAACAGTAGTGATAACGTAACACAGTGGTTGGAAGATAGTGCTGGTTGAAGCCCGACCCCGGTTCGAACCTCCAACCTTCATTTTAGAAGGAATTATTTTGACTGACGGAAAAATAGTCAATGTATGTAAAAGCCGATTTTTATTAGTTTGTGTACTGAATTTAAATTAATTGAGTGTTGATGTATGTATTTGCATAGGGTCCGAGTTTATGTATTGATCGGAACCGCGATTTTCTATTGATTATGAATTAGCCGATTTCTCGGCCTTGATATGACCATATCTGCCATCTAACCTA…	ATGCAGCCTGAATTCTCAGATCTTTCCCAACTCTCTACAGACGACTTTGATGCAAGCTCTCTACCGTCCAACAGCGAGAGATCCTCAAGCTCTGCTCCTCATTTGGAGATCAATGAAAGAATTGAAAGCGATGAGGAGATACGGAGAGTTCCGGAGTTTGGTGGAGAAGCTACTGGAAAAGAAATTTCCGGACGGGAATCTGGAACGGGAACCAGTCAGGACCAGACACAAATAAGAGTCGGAGGAGAGGGTCAAAGGAAGCGAGGGAGGACTCCGGCTGAGAAAGAGACCAAGCGGCTAAAGAGGTTGTTGAGGAATAGAGTTTCAGCACAGCAAGCAAGAGAGAAGAAGAAAGCTTACTTGGGTGAATTGGAAAACAGAGTGAAAGACTTGGAGAAC…	MQPEFSDLSQLSTDDFDASSLPSNSERSSSSAPHLEINERIESDEEIRRVPEFGGEATGKEISGRESGTGTSQDQTQIRVGGEGQRKRGRTPAEKETKRLKRLLRNRVSAQQAREKKKAYLGELENRVKDLENRNSELEERLSTLQNENQMLRQQDHANVTDGEVNESTIVHLLDPRSFFGKIKGSCTVAKFAEKPRRLLNSFDRQDY
	BniB06g067060	ATGGAAGATATCATCATCGGGGTGGTGGCTCTAGCCGCAATTATCTTCTTCTTCCTCTCTCAAAAATCAAAAACCAAACTGCCTCCCGGCCCACGAGGGCTTCCACTGATCGGAAACCTTCACCAGCTTAGCCAGCTTAACCCACAACGTTTCTTCTATGGATGGGCCAAAAAATACGGTCCAATCTTATCATACAAGATAGGAAGTCGAACAATGGTGGTCATATCATCCGCTGAGCTAACAAAAGAGCTTCTCAAGACGCAAGATGTCAACTTCGCGGACCGGCCTCCGCACCGTGGTCACGAGCTCATGACCTACGGACGAAGTGACATGGCAATGAACCACTACACACCTCTTTACCGGGAGATGAGGAAGATGGGCATGAACCACTTGTTCTCA…	ATGGAAGATATCATCATCGGGGTGGTGGCTCTAGCCGCAATTATCTTCTTCTTCCTCTCTCAAAAATCAAAAACCAAACTGCCTCCCGGCCCACGAGGGCTTCCACTGATCGGAAACCTTCACCAGCTTAGCCAGCTTAACCCACAACGTTTCTTCTATGGATGGGCCAAAAAATACGGTCCAATCTTATCATACAAGATAGGAAGTCGAACAATGGTGGTCATATCATCCGCTGAGCTAACAAAAGAGCTTCTCAAGACGCAAGATGTCAACTTCGCGGACCGGCCTCCGCACCGTGGTCACGAGCTCATGACCTACGGACGAAGTGACATGGCAATGAACCACTACACACCTCTTTACCGGGAGATGAGGAAGATGGGCATGAACCACTTGTTCTCA…	MEDIIIGVVALAAIIFFFLSQKSKTKLPPGPRGLPLIGNLHQLSQLNPQRFFYGWAKKYGPILSYKIGSRTMVVISSAELTKELLKTQDVNFADRPPHRGHELMTYGRSDMAMNHYTPLYREMRKMGMNHLFSPTRVATFNHVREDEARKMMAKIEKAAERSEPVDISELMLTFTNSVVCRQAFGKKYNEDGEEMKRFIKILYGTQSVLGKIFFSDFFPFFGFLDNWTGLTAYMMECFERQDTYIQEIIDETIDPNRVKPETESMIDLLMGIYKDQPFASKFTLENVKGMILNIVVAGTDTAAAAVVWGMTYLMKYPQVMKKAQAEVREYAREKGSTFITEDDVKNLPYFRALVKETLRIEPVIPLLIPRVCIQDTRIAGYDIPAGTTVNVNAWAVSRD…
	BniB07g011910	ATGGCTTCCTCTGTAATCTCTTCCTCTCCTTTCGTTTGCAAATCCTCCCAGGTTATATCATTTTCCTGTTTATTGATTTCACATTTTCTCTCCAATTTTCCGAATTCCTTAGAGCTTCTTTCCGAATTTCCAGCCGAAGGATTTGGGGTTCCCTAAATCGTCGCAGATTTCAGTTCACAGATGCCAGAAGAGATCGATTTCCCGGAAGATCGTCTCAGTCATGGCGCCCCAGCGATCATCCAGCACCACTGGATCGGTCTGGCTTTCTTCTCTCGTTTCGATTTGCTCTCCTCCCACAGTTTTTTTTTTCTCACATGATTTCGTCACTCTTCCAGGTAAAAACAGGGATGACGATGACGGAGAAGATTCTTGCCAAGGCAGCAGAGAAATCACAAGTGG…	ATGGCTTCCTCTGTAATCTCTTCCTCTCCTTTCGTTTGCAAATCCTCCCAGCCGAAGGATTTGGGGTTCCCTAAATCGTCGCAGATTTCAGTTCACAGATGCCAGAAGAGATCGATTTCCCGGAAGATCGTCTCAGTCATGGCGCCCCAGCGATCATCCAGCACCACTGGATCGGTAAAAACAGGGATGACGATGACGGAGAAGATTCTTGCCAAGGCAGCAGAGAAATCACAAGTGGTCCCTGGTGATAACATCTGGGTTAACGTTGATGTTCTCATGACTCATGATGTCTGTGGCCCTGGTGCTTTTGGTATCTTCAAGAGAGAGTTCGGTGAAAAAGCTAAGGTTTGGGACCCGGAGAAGATTGTTGTTATTCCAGACCATTACATATTCACTACT…	MASSVISSSPFVCKSSQPKDLGFPKSSQISVHRCQKRSISRKIVSVMAPQRSSSTTGSVKTGMTMTEKILAKAAEKSQVVPGDNIWVNVDVLMTHDVCGPGAFGIFKREFGEKAKVWDPEKIVVIPDHYIFTTDKRANRNVDIMREHCREQNIKYFYDITDLGDFRANPDYKGVCHVALAQEGHCRPGEVLLGTDSHTCTAGAFGQFATGIGNTDAGFVLGTGKILLKVPPTMRFILDGEMPSYLQAKDLILQIIGEISVAGATYKTMEFSGTTIESLTMEERMTLCNMVVEAGGKNGVIPPDATTFNYVENRTSVPFEPVYSDGNASFVADYRFDVSKLEPVVAKPHSPDNRALARECKDVKIDRVYIGSCTGGKTEDFMAAAKLFHAAGKQVKVPTF…
	BniB07g011950	ATGGATTCCTCTGTAATCTCTTCCTCTCCTTTCCTTTGCAAATCCTCCCAGGTTATATCATTTTCCTGTTTATTTATTTCACATTTTCTCTCCAATTTTCCTAATTCCTTAGAGCTTCTTTCCGAATTTCCAGCCGAAGGATTTGGGGTTCCCTAAATCGTCGCAGATTTCGGTTCACAGATGCCAGAAGAGATCGATTTCCCGGAAGATCGTCTCAGTCATGGCGCCCCAGCGATCATCCAGCACCACTGGATCGGTCTGGCTTTCTTCTCTCGTTTCGATTTGCTCTCCTCCCACAGTTTTTTTTTTCTCACATGATTTCGTCACTCTTCCAGGTAAAAACAGGGATGACGATGACGGAGAAGATTCTTGCCAAGGCAGCAGAGAAATCACAAGTGG…	ATGGATTCCTCTGTAATCTCTTCCTCTCCTTTCCTTTGCAAATCCTCCCAGCCGAAGGATTTGGGGTTCCCTAAATCGTCGCAGATTTCGGTTCACAGATGCCAGAAGAGATCGATTTCCCGGAAGATCGTCTCAGTCATGGCGCCCCAGCGATCATCCAGCACCACTGGATCGGTAAAAACAGGGATGACGATGACGGAGAAGATTCTTGCCAAGGCAGCAGAGAAATCACAAGTGGTCCCTGGTGATAACATCTGGGTTAACGTTGATGTTCTCATGACTCATGATGTCTGTGGCCCTGGTGCTTTTGGTATCTTCAAGAGAGAGTTCGGTGAAAAAGCTAAGGTTTGGGACCCGGAGAAGATTGTTGTTATTCCAGACCATTACATATTCACTACT…	MDSSVISSSPFLCKSSQPKDLGFPKSSQISVHRCQKRSISRKIVSVMAPQRSSSTTGSVKTGMTMTEKILAKAAEKSQVVPGDNIWVNVDVLMTHDVCGPGAFGIFKREFGEKAKVWDPEKIVVIPDHYIFTTDKRANRNVDIMREHCREQNIKYFYDITDLGDFRANPDYKGVCHVALAQEGHCRPGEVLLGTDSHTCTAGAFGQFATGIGNTDAGFVLGTGKILLKVPPTMRFILDGEMPSYLQAKDLILQIIGEISVAGATYKTMEFSGTTIESLTMEERMTLCNMVVEAGGKNGVIPPDATTFNYVENRTSVPFEPVYSDGNASFVADYRFDVSKLEPVVAKPHSPDNRALARECKDVKIDRVYIGSCTGGKTEDFMAAAKLFHAAGKQVKVPTF…
	BniB07g013920	ATGGATCTCTTCTTGATTTTTGCCGCCATGGTAGCGGTCACAGCCTTCTTCCTCCTCCGGAGCTCCACCAAGAAATCTCTCAAGCTGCCTCCGGGGCCAAAAGGTCTTCCTATTATTGGAAACCTCCATCAGATGGAGAAATTTAACCCCCAACACTTCCTCTTTCGTCTCTCCAAGCTCTACGGACCAATTTTCACAATGAAAATCGGTGGACGCCGCCTCGCTGTGATCTCCTCGGCTGAGTTAGCCAAGGAACTGCTCAAGACACAGGACCTCAATTTCACCGCTCGTCCTCTCCTGAAGGGGCAACAAACGATGTCATATCAAGGTCGTGAGCTTGGTTTCGGACAATACACAGCGTACTATCGTGAGATGAGGAAGATGTGTATGGTTAACCTA…	ATGGATCTCTTCTTGATTTTTGCCGCCATGGTAGCGGTCACAGCCTTCTTCCTCCTCCGGAGCTCCACCAAGAAATCTCTCAAGCTGCCTCCGGGGCCAAAAGGTCTTCCTATTATTGGAAACCTCCATCAGATGGAGAAATTTAACCCCCAACACTTCCTCTTTCGTCTCTCCAAGCTCTACGGACCAATTTTCACAATGAAAATCGGTGGACGCCGCCTCGCTGTGATCTCCTCGGCTGAGTTAGCCAAGGAACTGCTCAAGACACAGGACCTCAATTTCACCGCTCGTCCTCTCCTGAAGGGGCAACAAACGATGTCATATCAAGGTCGTGAGCTTGGTTTCGGACAATACACAGCGTACTATCGTGAGATGAGGAAGATGTGTATGGTTAACCTA…	MDLFLIFAAMVAVTAFFLLRSSTKKSLKLPPGPKGLPIIGNLHQMEKFNPQHFLFRLSKLYGPIFTMKIGGRRLAVISSAELAKELLKTQDLNFTARPLLKGQQTMSYQGRELGFGQYTAYYREMRKMCMVNLFSPNRVASFRPVREEECQRMMDKIYKAADQSGTVDLSELLLSFTNCVVCRQAFGKRYNEYGTEMKRFINILYETQALLGTLFFSDLFPYFGFLDKLTGLSARLKRAFKELDTYLQELLDETLDPNRPKPETESFIDLLMQIYKDQPFSIKFTHENVKAMILDIVVPGTDTAAAVVVWAMTYLIKYPEAMKKAQDEVRNVVGDKGYVSEEDIPNLPYLKAVIKEALRLEPVIPILLHRETIADAKIGGYDIPAKTIIQVNAWAVSRD…
	BniB07g020470	ATGGCCTCTCGTATTGCTAAAGATGTTACCGAAGTAAGCACTTCACCTTTTCATTTACAACAACAAAAAAAAGTGTGAGGCTTTTGTTCCATGTTCCATGTAATGATTTGATTCCACTTACTCTCCGCAGTTGATTGGGAACACTCCTTTGGTGTATCTGAACAATGTGGCTGAAGGATGTGTTGGTCGTGTCGCTGCTAAGCTCGAGATGATGGAACCTTGCTCCAGTGTCAAAGACAGGTTTTTCTGCTTTTGTCCACATCTCTCTGCGCTCTGTTTTTTCATCTCCGAGTTTCGGTTTTGTAAAAACTAAGTTGTTCTTTTTTTTTCTTTTGCAGGATTGGTTTTAGCATGATTTCTGATGCAGAGAAAAAGGGTCTTATAAAACCAGGAGAGGTC…	ATGGCCTCTCGTATTGCTAAAGATGTTACCGAATTGATTGGGAACACTCCTTTGGTGTATCTGAACAATGTGGCTGAAGGATGTGTTGGTCGTGTCGCTGCTAAGCTCGAGATGATGGAACCTTGCTCCAGTGTCAAAGACAGGATTGGTTTTAGCATGATTTCTGATGCAGAGAAAAAGGGTCTTATAAAACCAGGAGAGAGTGTGCTGATTGAGCCAACGAGTGGAAACACCGGAGTTGGGTTAGCATTCACGGCGGCTGCCAAGGGCTACAAGCTTATCATCACAATGCCAGCTTCAATGAGTGTAGAGAGAAGGATCATTCTCTTGGCTTTTGGAGTTGAGTTGGTCTTAACTGACCCTGCCAAGGGCATGAAAGGCGCTATCGCAAAGGCCGAA…	MASRIAKDVTELIGNTPLVYLNNVAEGCVGRVAAKLEMMEPCSSVKDRIGFSMISDAEKKGLIKPGESVLIEPTSGNTGVGLAFTAAAKGYKLIITMPASMSVERRIILLAFGVELVLTDPAKGMKGAIAKAEEILAKTPNGYMLQQFENPANPKIHYETTGPEIWKGTGGKIDGFVSGIGTGGTITGAGKYLKEQNPNVKLYGVEPIESAILSGGKPGPHKIQGIGAGFIPSVLEVDLIDEVVQVSSDESIDMARLLALKEGLLVGISSGAAAAAAIKLAKRPENAGKLFVAVFPSFGERYLSTVLFDATRKEAESMTFEA-
	BniB07g030730	ATGGCTCCTTCTGCGCAAATTCTTCCTACAAGGTAAAACATAACCTTGCAAACAAGTTATATGTATTAAGAAAAAATTATAATTGTCTCGCATTAGCTTATGTAAATATGATCATATGATATTATGATATTGACGATAATTATTTTTCTTAACAGTGCGTCGGATGAGAAATACGCGAATGTGAAGTGGGAAGAACTAGGATTCGGGTTTTATCGTACGGACAACATGTATGTTGCCAAGTGCAAGTATGGAGAGAGTTTCCAAGAGGGAAGTATTGTTCCTTACGCTGATTTTCAGATCAGCCCTTGCTCTGCAGTTCTTAATTATGGCCAGGTCTGATACTAATCACTATATATCAATTAATTAAGATAAAACTATAATCAGAACATATAACCAAAA…	ATGGCTCCTTCTGCGCAAATTCTTCCTACAAGTGCGTCGGATGAGAAATACGCGAATGTGAAGTGGGAAGAACTAGGATTCGGGTTTTATCGTACGGACAACATGTATGTTGCCAAGTGCAAGTATGGAGAGAGTTTCCAAGAGGGAAGTATTGTTCCTTACGCTGATTTTCAGATCAGCCCTTGCTCTGCAGTTCTTAATTATGGCCAGATTCCTCCGCCGGGGAGAGGAACATTGTATATCAGACCCATCTTGTTTGGGAGTGGTCCTATACTTGGCTCATTTCCTGTTCCCGAGTACACCTTCACAGTGTTCGCATGTCCCGTTGGTCGTTATCACAAGGATAACGTGGGCTTGAACCTGAAAATTGAAGATAAGTTTCGTCGCGCTTTCCCAAGT…	MAPSAQILPTSASDEKYANVKWEELGFGFYRTDNMYVAKCKYGESFQEGSIVPYADFQISPCSAVLNYGQIPPPGRGTLYIRPILFGSGPILGSFPVPEYTFTVFACPVGRYHKDNVGLNLKIEDKFRRAFPSGTGGVKSITNYSPVWITLAEAKAQGFSDVLFLDAATGKNIEELFASNVFIVKGNVVSTPEISGTILPGVTRNSIIELTRDFGYKVKERVVPVEDLLDADEVFCTGTAAIVTTIAWLKNLVNVFNKYRTGFKTGDKTLAAELFATLTDIQMGRVEDKKGWTVELTDATTPGLKL
	BniB07g037520	ATGGAGAGAAGCTTGAATAAAATGAAGAAAAATAATATCAACTCAACAAGAAGCAATATGATGAAAGACAATGAATTGTTTCATGTGGTACACAATATTCCTTGTGGAGAAACTCCCTATGTCAAAGCCAAACATGCTCAGGTACATATTTTCAATTTTTTTATAAGAGTACATCATCATCACAATTGCTCATTATGTATACTCCAGTGACAAGAGTGAAAGATTATTAATAATGAGTATGAAACATTACTGGTAATGGTTGCAGTTGATAGAGAAGAACCCGGAGATGGCAATAGTGTGGTTCTGGAAAGCCATTAACACAGGAGACAGGGTAGACAGTGCTCTCAAGGACATGGCTGTTGTAATGAACCAACTTGACCGTCCCGAAGAAGCCATTGA…	ATGGAGAGAAGCTTGAATAAAATGAAGAAAAATAATATCAACTCAACAAGAAGCAATATGATGAAAGACAATGAATTGTTTCATGTGGTACACAATATTCCTTGTGGAGAAACTCCCTATGTCAAAGCCAAACATGCTCAGTTGATAGAGAAGAACCCGGAGATGGCAATAGTGTGGTTCTGGAAAGCCATTAACACAGGAGACAGGGTAGACAGTGCTCTCAAGGACATGGCTGTTGTAATGAACCAACTTGACCGTCCCGAAGAAGCCATTGAAGCTATCAAGTCCTTTCGTCCTCGTTGTTCTAAGACCTCCCAAGATTCCCTCGATAATGTCCTCATCGACTTATACAAGAAATGTGGGAGGATGGAGGAGCAAGTTGAGTTGTTGAAGAGGAAA…	MERSLNKMKKNNINSTRSNMMKDNELFHVVHNIPCGETPYVKAKHAQLIEKNPEMAIVWFWKAINTGDRVDSALKDMAVVMNQLDRPEEAIEAIKSFRPRCSKTSQDSLDNVLIDLYKKCGRMEEQVELLKRKLRRIYQGVAFNGKPTKTARSHGKKIQVTVQQEISRLLGNLGWAYMQQAKYLSAEAVYRKAQIVEPDANKSCNLAMCLIKQGRFEEGRLVLDNVLESRVLGADDCRTRQRAGELLSELEASLPRGRDAEMEDFLGNMLDDDLVLGFEQKTATSFRSKRLPIFEQISSFRNQIVC-
	BniB07g037550	ATGGAGAGAAGCTTGAATAAAATGAAGAATAATAACATTAACTCAACAAGGAGCAATATGATGAAAGACAATGAATTCTTTCATGTGATTCACAAAGTTCCTTGTGGAGATACTCCATATGTCAAAGCCAAACATGCTCAGGTACATATTTTCAAGCTTTTTTTTCTTTTTATGAGTACATCCTTTTTATAAGAGTACATCATTATCACACTTGCTCATATACATTAATGTATATTCGGATGGAAGAGTGAATTCAGATTATTAATAACACTAAGAGTATATAATATTGTTGGTTTGCAGTTGATAGAGAAGAACCCGGAGATGGCAATAGTGTGGTTCTGGAAAGCCATTAACACAGGAGATAGAGTAGATAGTGCTCTAAAGGACATGGCTGTTGTA…	ATGGAGAGAAGCTTGAATAAAATGAAGAATAATAACATTAACTCAACAAGGAGCAATATGATGAAAGACAATGAATTCTTTCATGTGATTCACAAAGTTCCTTGTGGAGATACTCCATATGTCAAAGCCAAACATGCTCAGTTGATAGAGAAGAACCCGGAGATGGCAATAGTGTGGTTCTGGAAAGCCATTAACACAGGAGATAGAGTAGATAGTGCTCTAAAGGACATGGCTGTTGTAATGAAACAACTTGACCGTTCGGAAGAAGCCATCGAAGCTATCAAATCATTTCGTCCTCGTTGTTGCAAGAACTCTCAAGATTCACTCGACAATGTCCTCATCGACTTATACAAGAAATGCGGGAGGATGGAGGAGCAAGTTGAATTGTTGAAGAGGAAA…	MERSLNKMKNNNINSTRSNMMKDNEFFHVIHKVPCGDTPYVKAKHAQLIEKNPEMAIVWFWKAINTGDRVDSALKDMAVVMKQLDRSEEAIEAIKSFRPRCCKNSQDSLDNVLIDLYKKCGRMEEQVELLKRKLRQIYQGVAFNGKPTKTARSHGKKFQVTVQQEISRLLANLGWAYMQQAKYLSAEAVYRKAQIVEPDANKSCNLAMCLIKQSRFEEGRAVLEDVLESRVLGSDDCKTRQRAVELLSELEASLPRGRDAEMEDVLGNMLDDDFVLGSEEWTATSFRSKRLPIFEQISSFRNQLVC-
	BniB07g038410	ATGGTCGGTGGCTGCTCGTCTCTGTCTTCTTCCACTTTCATTGCCACTACTACTTTGTCTTCTTCCCTTACTCCTCTCATTCCAAGAAGCTTCCTTTTCCAGACCCCTTTAAATCCGAGAAAGGCTGCAGCTTTAAGGTGCGTGAGCTCGCTAACGATGGAATCACAGCAGAAACCCATTCTCGATTTCGAAAAATTTGACGATGGGTTTGTTCAGAAACTGGTCTACGATGCTCTCGTTTGGTCTTCCCTTCACGGCCTTGTCGTCGGTGACAAAACTTATCAGGTTAGTTCCCCCCAAGTTCCTGTCTTTTGATGTTGGGTCATGTGTTCCGGACAAAGTTTGAGGCAAAGATCGAAACTTTTGAATCTCTATGAGTCGTTTTATTGATTGATTATT…	ATGGTCGGTGGCTGCTCGTCTCTGTCTTCTTCCACTTTCATTGCCACTACTACTTTGTCTTCTTCCCTTACTCCTCTCATTCCAAGAAGCTTCCTTTTCCAGACCCCTTTAAATCCGAGAAAGGCTGCAGCTTTAAGGTGCGTGAGCTCGCTAACGATGGAATCACAGCAGAAACCCATTCTCGATTTCGAAAAATTTGACGATGGGTTTGTTCAGAAACTGGTCTACGATGCTCTCGTTTGGTCTTCCCTTCACGGCCTTGTCGTCGGTGACAAAACTTATCAGAAATCAGGAACAGTTCCAGGGGTTGGGATGATGCACGCCCCCATTGCATTGCTACCGACTCCATTCCCTGAGAGTTATTGGAACCAAGCTTGTGAAGTTGCTCCCATCTTCAAC…	MVGGCSSLSSSTFIATTTLSSSLTPLIPRSFLFQTPLNPRKAAALRCVSSLTMESQQKPILDFEKFDDGFVQKLVYDALVWSSLHGLVVGDKTYQKSGTVPGVGMMHAPIALLPTPFPESYWNQACEVAPIFNELVDRISLDGKFIQDSLSRTKKADVFTSRLLDIHSKMLKSNKREDIRLGLHRSDYMLDEETKSLLQIEMNTISCSFPGFGRLVTELHQSLLRSHGDRLGLDSERVPRNASTSQFADAMAKAWLEYNNPRAVVMVVVQPDERNMYDQLWLSSVLREKHNIVTIRKTLAEVENEGRVQEDGTLVVGGQAVSVVYYRSGYTPRDYPSESEWNARLLIEQSSAVKCPSIAYHLAGTKKIQQELAKPGVLERFMDNKDDIAKLRECFAGLW…
	BniB07g040970	ATGTCTCAATTGCATATGTATTTGTTACAATGTGTGTACATAATGTATATAGGGTTGAAGAGATGTGGGAAGAGCTGTAGACTAAGATGGGCTAATTACTTAAGACCCGATATCAAGAGAGGAGAGTTTACTCCTGAAGAAGACGATACTATTATCAAACTTCATGCTCTTAAGGGTAACAAGTAAGAATATTTTCCTTTGCCTTATTACTTTTTGTATTAGTTAATAGTAATTTAGAACTATATAATATTTGATCAAAAAAAAGAACTATATAATATAAGTATTCAATCTATTTATGGAGTATAATTTTTGATATTTTATGTGGTGTTAATTATTGAAGGTGGGCCGCAATAGCAACTCATCTGGCTGGAAGAACCGACAACGAAATTAAAAACTATT…	ATGTCTCAATTGCATATGTATTTGTTACAATGTGTGTACATAATGTATATAGGGTTGAAGAGATGTGGGAAGAGCTGTAGACTAAGATGGGCTAATTACTTAAGACCCGATATCAAGAGAGGAGAGTTTACTCCTGAAGAAGACGATACTATTATCAAACTTCATGCTCTTAAGGGTAACAAGTGGGCCGCAATAGCAACTCATCTGGCTGGAAGAACCGACAACGAAATTAAAAACTATTGGAACACAAATCTTAAAAAGCGTTTAAAACAAAAAGGTATCGATCCAGCCACTCACAAACCGATAATTACAACCGGTTTAGGACCAAAAACCCATAAGTTCGGTTCATCCGGTTCCGCACGGGTTCTTAACCGCGTCGCGAGCAAATACGCGGTCGAC…	MSQLHMYLLQCVYIMYIGLKRCGKSCRLRWANYLRPDIKRGEFTPEEDDTIIKLHALKGNKWAAIATHLAGRTDNEIKNYWNTNLKKRLKQKGIDPATHKPIITTGLGPKTHKFGSSGSARVLNRVASKYAVDLNRDLVTGIIIGNPTIIADVSQNSGEVENSTTTLLNKTSTSSGFSDNCSFSDGFTEFFSNEEISDLYMDVDNVGLMEELKGILSCESAVAGGVKGSPEVNVSDKMEFLDSWNEEDDLQKFVSSLSCVFV-
	BniB07g041200	ATGTATAAAAAATATGGTGTTTTACTAGGGTTGAAAAGGTGTGGGAAGAGTTGTAGACTGAGATGGACTAACTACCTAAAACCTGAGATCAAAAGAGGCGAGTTTAGTTCAGAGGAGGAACAGATTATCATCATGCTTCATGCTTCTCGTGGAAACAAGTAAGTATATGTGTGTATGGGTCCTCCAATGATCATCATTCTGATTTTGTTTCTTCCATGAAAAGGTTTCTTAAAATATAATCATTTTACTTTCGGTCTTCGATTTTTTATTATCTCATTTGTTCATGTCTTTAGGTGGTCGGTCATAGCTAGACATTTACCTAGAAGAACAGACAATGAGATCAAGAACTACTGGAACACACATCTCAAAAAGCGTTTGATCGAACAGGGTATTGATCCC…	ATGTATAAAAAATATGGTGTTTTACTAGGGTTGAAAAGGTGTGGGAAGAGTTGTAGACTGAGATGGACTAACTACCTAAAACCTGAGATCAAAAGAGGCGAGTTTAGTTCAGAGGAGGAACAGATTATCATCATGCTTCATGCTTCTCGTGGAAACAAGTGGTCGGTCATAGCTAGACATTTACCTAGAAGAACAGACAATGAGATCAAGAACTACTGGAACACACATCTCAAAAAGCGTTTGATCGAACAGGGTATTGATCCCGTGACACACAAGCCACTAGCTTCTAATACAAACCCTACTGTCACCACGTCGCCTGAGAATTTGCATTCCCTAGATGCATCTAGTTTCGACAAGCAATATTCCCGGTCAAGCTCAATGCCTTTCCTGTCTCGTCCT…	MYKKYGVLLGLKRCGKSCRLRWTNYLKPEIKRGEFSSEEEQIIIMLHASRGNKWSVIARHLPRRTDNEIKNYWNTHLKKRLIEQGIDPVTHKPLASNTNPTVTTSPENLHSLDASSFDKQYSRSSSMPFLSRPPSSGFNTVSETTSNDRKPVHEDGSLICKKRFKKSSSTSRLLNKVAAKAISMKEVLSASMEGTMSANTSFSNGFSEQIRNEEDSSNASLINTLADFDPFLQSPLYPEHEMNTTSDLGIDQDYFSHFLENFGRDDHNEEHNMNHEYVHDLLMSDVSQEVSSTSVDDQDNTIEGWSNYLLDHADFIYETDSDSFEKHLI-
	BniB07g041760	ATGGAGAGAAAGCCTCTCGAAGTCGAGTCGACAGATCACCAAAAACTTTCCTCCGCCGTGTACGATGGCCCTGTTGAAGAAGATGTCCAGGAGACCAAAGTCGTTTATAGAGGCTGGAAAGTCATGCCTTTCATCATTGGTAACACAAAAATACAATCACTTGCCGTGCTCTATAAACTTTCTTCTTGTGGAAACTATTGGTTTCACGAAGTTAAGAAAACCCCGAATAGAGTAATTCTTGATCAACAAGAAACAATAACCTAGAATCAACTATGACAAAATCTCATTTTTAAAAACTTTCTTCTTTTGGAAACTATTTCTTTTGTCGTGTTGTTGTCTTAAGATCAAAGTCTTAGGTTCTTGGTTATTTTTTGTTGTTGTTACCACCAGGAAATGAGA…	ATGGAGAGAAAGCCTCTCGAAGTCGAGTCGACAGATCACCAAAAACTTTCCTCCGCCGTGTACGATGGCCCTGTTGAAGAAGATGTCCAGGAGACCAAAGTCGTTTATAGAGGCTGGAAAGTCATGCCTTTCATCATTGGAAATGAGACATTTGAGAAGCTTGGGATCATTGGAACACTATCAAACCTTCTGGTTTATTTAACTGCTGTCTTCAACATGAAGAGTATCACAGCTGCAACAATCATCAATGCCTTTGCTGGCACAGTCAACTTTGGAACTTTCGTTGCTGCTTTCCTCTGTGACACTTACTTCGGTCGATACAAGACTCTCACCGCCGCGGTCATCGCCTGTTTTCTTGGATCACTTGCGATACTATTGACTGCTGCAGTCCCACAACTA…	MERKPLEVESTDHQKLSSAVYDGPVEEDVQETKVVYRGWKVMPFIIGNETFEKLGIIGTLSNLLVYLTAVFNMKSITAATIINAFAGTVNFGTFVAAFLCDTYFGRYKTLTAAVIACFLGSLAILLTAAVPQLHPAPCGTASSCIGPSGGQIAFLLMGLGILVVGAGGIRPCNLAFGADQFNPKSGSGKRGIDSFFNWYFFTFTFAQILSLTVVVYIQSNVSWTIGLTIPVVLMFLASVIFFAGAKLYVKIEASGSPLASIAHVITAAIKKHGLKSVEQPWLNLYNYYPAKYANAKLKYTDQFRFLDKAAILAPEDKLEADGKPVNPWKLCTMQQVEEVKCIMRVLPISFASSIYYLTITQQMTYPVFQALQSDRRLGSGGFVIPAATYVVFLMTGMTL…
	BniB07g048400	ATGGTGGTTCCCGGACGGAGAACCGTCTGGGACGGAGTGCTCGAGCTGACGAAGACGGCTCAGGAACAGTGCGTCGATGCTCGTCTCTGGGCTTCCCACTTATCTTCCAAGCTGAAACCTTTCGTCGAGTTCCCCTCAACAGAGCTCGCGGAGGTTCTCGTCTCCTACATTTGCTGGGATAACAACGTCCCTATCCTCTGGAAGTTTCTCGAGAGAGCTATGGCTCTGAACCTCGTCTCTCCTCTCCTTGTTCTCGCTCTGCTCGCTGTCAGGTTTTTGTAATTTTGGATTTGTAAATTGGATAATTGTTAAAGCTTCTTTAAAGTCTTGAAGTGTTAAAGCTTGAATCTTTTATTTGTTTGGTTTCTTGCAGAGTTGTTCCAAACCGGTCTACTCAAT…	ATGGTGGTTCCCGGACGGAGAACCGTCTGGGACGGAGTGCTCGAGCTGACGAAGACGGCTCAGGAACAGTGCGTCGATGCTCGTCTCTGGGCTTCCCACTTATCTTCCAAGCTGAAACCTTTCGTCGAGTTCCCCTCAACAGAGCTCGCGGAGGTTCTCGTCTCCTACATTTGCTGGGATAACAACGTCCCTATCCTCTGGAAGTTTCTCGAGAGAGCTATGGCTCTGAACCTCGTCTCTCCTCTCCTTGTTCTCGCTCTGCTCGCTGTCAGAGTTGTTCCAAACCGGTCTACTCAATCAGAGGCTTATAGGATTTACTTGGAGCTTCTCAAGAGAAACGTTTTCAGGATTAAAGATCATATTACCGGATCTCACTACCACAACGTGATGAACTCAGTA…	MVVPGRRTVWDGVLELTKTAQEQCVDARLWASHLSSKLKPFVEFPSTELAEVLVSYICWDNNVPILWKFLERAMALNLVSPLLVLALLAVRVVPNRSTQSEAYRIYLELLKRNVFRIKDHITGSHYHNVMNSVANILRLPELFPLETNRPGVLVVEFVFKMVSLLLDACLTDEGLIELSQDSTSLWLIKSQDMEIDAPETTGSDEKLQSLNNIMAIEMIAEFLRNTVISRLLYLVSSNRASSWHEFVRKVHVLAESSSALRSSKVLNSGDLLELVSNKRFGYSRDSKVDSFRESNAIVDIGSLASFAGLCHGASLSSLWLPLDLVFEDAMDGYQVNPTSAIEIITGLAKTLKGINGSAWHDTFLGLWIAALRLVQRERDPIEGPIPRLDTRLCMSLCIV…
	BniB07g056480	ATGGACATCAAGTTGCTGCTGCTTCTTGTTCTTGTGTTGATTCAGCATGCTTATTCAAGATCTACCGTCAGATATCTTCCTGGTTTCCAAGGCCCTCTTCCTTTCGAACTTGAAACCGGGTTCTATTCCTCTTCTCATAAGTTAATAATCTTGTAAATGAATGACTCTGTTATCTGAATTTCTGGAGTTAAGTCGTCTAGGTACATTGGTGTTGGTGAGGCAGAGGAAGAACAGTTGTTCTACTACTTCATCAAGTCTGAGAGAAACCCAGAAGAAGACCCTCTTCTTATCTGGTTAAGTGGAGGACCTGGCTGCTCTTCTCTCTCTGGCCTTCTTTTTGAGAATGGTAACATCTAAAACTCTTTTTTTTTCTAGAGAAATTTTGATGATTTTGTTTTC…	ATGGACATCAAGTTGCTGCTGCTTCTTGTTCTTGTGTTGATTCAGCATGCTTATTCAAGATCTACCGTCAGATATCTTCCTGGTTTCCAAGGCCCTCTTCCTTTCGAACTTGAAACCGGGTACATTGGTGTTGGTGAGGCAGAGGAAGAACAGTTGTTCTACTACTTCATCAAGTCTGAGAGAAACCCAGAAGAAGACCCTCTTCTTATCTGGTTAAGTGGAGGACCTGGCTGCTCTTCTCTCTCTGGCCTTCTTTTTGAGAATGGGCCTCTGTCTTTCAACATCGAGGCTGAAAATGGAGATATCCCATCATTGGTCTCTACTACATATTCATGGACTAAGGTGGCCAATATAATCTATTTGGATCAGCCTGCTGGTACTGGCTTCTCTTACTCAAGA…	MDIKLLLLLVLVLIQHAYSRSTVRYLPGFQGPLPFELETGYIGVGEAEEEQLFYYFIKSERNPEEDPLLIWLSGGPGCSSLSGLLFENGPLSFNIEAENGDIPSLVSTTYSWTKVANIIYLDQPAGTGFSYSRNSLAEIPSDTRSAKLVNEFVHNWLAKHPEYYSNPFYVAGNSYSGIVVPAIVQEISNENGLCCKPLVNLQGYVLGNPVTDFNNNDNWRIPFAHGMALISDENYELLRRSCRGNYIKVDPLNTDCLRSVQEFENCVSGLDITYILGLKYANASDPCVSNPTEHRMSVHSNRWANDESVRRALHVEKGSIGEWLRCYREIPYKFDIRSSVPYHRNISIKRYRSLIFSGDHDMYVPFLATQDWIRSLNYSIIDDWRPWMIHNQVAGYTRT…
	BniB07g058100	ATGGTCAAGAAAGCGAAATGGCTGAAGAACGTTAAGAAGGCTTTTAGCCAAGATTTAAAGGTACCACCACTGAGTTTAGATGTAACAGATTCATATTCTTATGCCTTTTCTAATTTTTTTTAATGTTTTTATTACAGAAACTGAAACATAAATCGGTTGAGAATCGAAATAGTGAGATCTCTTATCCTGTATTGGTAGCTTCATCCAGAAGTTCTCCTCCTCAGTTTGAGGTCAGAGTTGATAAGGTCAAACATAAGAAAAATCTCTACGCTCCTCCTCCTCCTCCTCCTCCTCCGGAAGAAGAAGAAGACGAAGATGTTATTGTAGATTCACCTCCATCTTCTCCTGAGTATGTTCCTCCAGAAGCTAAACCTGACAGGTTTGCAGGAAAGTCAAAGG…	ATGGTCAAGAAAGCGAAATGGCTGAAGAACGTTAAGAAGGCTTTTAGCCAAGATTTAAAGAAACTGAAACATAAATCGGTTGAGAATCGAAATAGTGAGATCTCTTATCCTGTATTGGTAGCTTCATCCAGAAGTTCTCCTCCTCAGTTTGAGGTCAGAGTTGATAAGGTCAAACATAAGAAAAATCTCTACGCTCCTCCTCCTCCTCCTCCTCCTCCGGAAGAAGAAGAAGACGAAGATGTTATTGTAGATTCACCTCCATCTTCTCCTGAGTATGTTCCTCCAGAAGCTAAACCTGACAGGTTTGCAGGAAAGTCAAAGGAAGAAGCAGCTGCCATCATAATCCAGTCTACATTTAGGGGACATTTGGCGAGAGGAGAGTCACAGGGGATGAGGAGG…	MVKKAKWLKNVKKAFSQDLKKLKHKSVENRNSEISYPVLVASSRSSPPQFEVRVDKVKHKKNLYAPPPPPPPPEEEEDEDVIVDSPPSSPEYVPPEAKPDRFAGKSKEEAAAIIIQSTFRGHLARGESQGMRRLARLKLLMEGSVIKRQAAHTLKCMQTLTRVQSQIRSRRIRMSEENQARHKQLLHKHAKELGALKSGGNWNDSNQSKEQIEAGLLNKYEATMRRERALAYAFTHQQNLKSNVRSGNTMFMDPSNPTWGWSWLERWMADKPWESSEKEQNKNVKSSVKTSTAKPSNRKKLNSLTQPNVPSSSTTRNPRKSKPTPPSIKSKTTDEITKSSEKNRKHSIARSAVSDDEGLASSTARRRNMVPAKPITRGKLKGQSSSGVAAVTTTTAKTE…
	BniB08g002350	ATGTCTTCCTCGATGAATGTGGCGACGATGAAGCCTCTGAGCTTCTCTCGCCGGCTCGTCCCCTCTGCGGTTTCTCGCGGACTCTCCTCTTCTGTGACCGTTTCTGGATGTTCCGGTAGAAGCTCGGCTCACGCGCCTTCTTTCCGTTCGATCAAATGCGTCTCTGTCTCTCCGGAAGCTTCAATAGGTGAATCCATCTGCTCTTCGTTTTGTTAATTTTCTTCAGGTCATTTCGAATCTGTATTTCTGATAGACTTGGTTAGGCATCCGGTTTAGGTTAATTTGGTTTTCGGTTAGTTCGGTTTAGAGGTAGTTGTGCAAAACAGTTACTGATGTTTTTTTTTGTTTTGTTGTTTTATTTGCAGTAAGTGATAATAAGAAGCTCGCAGATGCTTCTAA…	ATGTCTTCCTCGATGAATGTGGCGACGATGAAGCCTCTGAGCTTCTCTCGCCGGCTCGTCCCCTCTGCGGTTTCTCGCGGACTCTCCTCTTCTGTGACCGTTTCTGGATGTTCCGGTAGAAGCTCGGCTCACGCGCCTTCTTTCCGTTCGATCAAATGCGTCTCTGTCTCTCCGGAAGCTTCAATAGTAAGTGATAATAAGAAGCTCGCAGATGCTTCTAAGAGCACAAACCTTGTACCGATCTACCGCTGCATATTCTCTGATCAGCTCACTCCTGTTCTTGCTTACCGTTGTCTCGTCAAAGAAGATGACCGTGAGGCTCCTAGCTTTCTTTTTGAGTCTGTTGAGCCTGGCTCTCAGATGTCAAGCGTCGGTCGTTATAGCGTTGTTGGGGCTCAA…	MSSSMNVATMKPLSFSRRLVPSAVSRGLSSSVTVSGCSGRSSAHAPSFRSIKCVSVSPEASIVSDNKKLADASKSTNLVPIYRCIFSDQLTPVLAYRCLVKEDDREAPSFLFESVEPGSQMSSVGRYSVVGAQPAMEIVAKEDKVIVMDHKSGSLTEEYVEDPMEVPRKISESWNPDPQLVQDLPDAFCGGWVGFFSYDTVRYVEKRKLPFSKAPEDDRNLPDMHLGLYDDVVVFDHVEKKAYVIHWIRLDGSVPYETAYSNGLQHLENLVSKLHDIAPPKLAAGNVNLQTRQFGPALENSNVTREEYKEAVVNAKEHILAGDIFQIVLSQRFERRTFADPFEVYRALRVVNPSPYMGYLQARGCILVASSPEILTKVKQNKIVNRPLAGTSRRGKTEV…
	BniB08g003370	ATGTCAAGAAAGCCATGTTGTGTGGGAGAAGGGCTGAAGAAAGGAGCATGGACCATCGAAGAAGACAAGAAGCTCATTTCTTACATTCAAGAACATGGTGAAGGAGGGTGGCGTGACATTCCCCAAAAAGCTGGTATATTATATCGACACATGCATGCATAATATATAGTTTTGTATATATGATTATATATGGTCTAACGCATAATGTTTGTATGGCTATGGTGTTTAGGACTGAAACGATGTGGAAAAAGTTGTAGATTGCGATGGGCTAACTACTTGAAACCCGATATCAAGAGAGGAGAATTTAGCTACGAGGAGGAGCAGATCATTATCATGCTTCACGCTTCCCGTGGCAACAAGTAATATATTTTATTTTAGCATTATTTCTGCAATTTTAAA…	ATGTCAAGAAAGCCATGTTGTGTGGGAGAAGGGCTGAAGAAAGGAGCATGGACCATCGAAGAAGACAAGAAGCTCATTTCTTACATTCAAGAACATGGTGAAGGAGGGTGGCGTGACATTCCCCAAAAAGCTGGACTGAAACGATGTGGAAAAAGTTGTAGATTGCGATGGGCTAACTACTTGAAACCCGATATCAAGAGAGGAGAATTTAGCTACGAGGAGGAGCAGATCATTATCATGCTTCACGCTTCCCGTGGCAACAAGTGGTCGGTCATAGCGAGACATTTGCCAAAAAGGACAGACAACGAGATCAAGAACTACTGGAACACACATCTCAAAAAACGCTTGATCGATCAGGGTATCGATCCCTTGACCCACAAGCCACTTGCCTCTAACCAT…	MSRKPCCVGEGLKKGAWTIEEDKKLISYIQEHGEGGWRDIPQKAGLKRCGKSCRLRWANYLKPDIKRGEFSYEEEQIIIMLHASRGNKWSVIARHLPKRTDNEIKNYWNTHLKKRLIDQGIDPLTHKPLASNHEPATPKTSDFQDDSNPSNLDEQSHSGSMSPKSLPLSSVSCNSDETQRNYSSLRSKKSSSTSDLLNKVATRAASMGKILSASMEGTLIPSTTLSRPCLNDGFSETSQFQMDELDPFSNSSEYIDHIKEDICMNFDLNNSDYDFSQFLEQFSNNAAEEADDIIGYDQDLLFSDVSSTSVDEDGMMRDITGWSNYLLDDSDFSYDTNQD-
	BniB08g009620	ATGGTAACAAAAGCATATCCACTACGAATATTGAATCACAACACGGAAGAACATGTCAACAACTCAGGAGGAGGAGCCGAGCCTTACGTGGGTCTAGAATTCGACACTGCAGAGGAAGCTCGTGAGTACTACAACGTGTACGCAGCACGCACCGGTTTCAAAGCTAGGACCGGTCAGCTTTACAGATCGAGAACAGATGGAACCGTTTCTTCGAGGAGGTTTGTCTGCTCGAAAGAAGGTTTTCAGCTGAATTCGAGAACCGGATGCACTGCTTTCATCCGCGTCCAGAGAAGGGATACAGGGAAATGGGTTCTTGACCAGATCCAGAAAGAGCATAACCATGAGCTTGGTGGTGAAGCTCACGTGGAGGAGATGGCGAATACGACTCCGCGTCCTGTG…	ATGGTAACAAAAGCATATCCACTACGAATATTGAATCACAACACGGAAGAACATGTCAACAACTCAGGAGGAGGAGCCGAGCCTTACGTGGGTCTAGAATTCGACACTGCAGAGGAAGCTCGTGAGTACTACAACGTGTACGCAGCACGCACCGGTTTCAAAGCTAGGACCGGTCAGCTTTACAGATCGAGAACAGATGGAACCGTTTCTTCGAGGAGGTTTGTCTGCTCGAAAGAAGGTTTTCAGCTGAATTCGAGAACCGGATGCACTGCTTTCATCCGCGTCCAGAGAAGGGATACAGGGAAATGGGTTCTTGACCAGATCCAGAAAGAGCATAACCATGAGCTTGGTGGTGAAGCTCACGTGGAGGAGATGGCGAATACGACTCCGCGTCCTGTG…	MVTKAYPLRILNHNTEEHVNNSGGGAEPYVGLEFDTAEEAREYYNVYAARTGFKARTGQLYRSRTDGTVSSRRFVCSKEGFQLNSRTGCTAFIRVQRRDTGKWVLDQIQKEHNHELGGEAHVEEMANTTPRPVRAPAPTKLAATVNQHRPKMKVVDESDREQRSSSKSSLKRFKSGEGEVSNDGHHPKAVSGSEPYAGLEFGSANEACQFYQAYAEVVGFRVRIGQLFRSKVDNSITSRRFVCSREGFQHPSRMGCGAYMRIKRQDSGGWIVDRLNKDHNHDLEPGKKNQDGMKKITDDVTMTGVLDSVDLIELNNNTNSHHIKKAATSSRENRIGKEWYPLLLDYFQSKQTEDMGFFYAVELDVHNGSCLSMFWADSRARFACSQFGDAVVFDTSYRK…
	BniB08g013930	ATGGTTTACGTTTTGGTTTTGGTGCCACTCGTATTGTTTCTATTAGCGTACAAATTCTTATTCTCAACCAAGACTAAGCGTTACAATCTCCCACCAGGACCAACTCCCTTTCCCATCGTCGGCAATCTCCACCTCGTGAAACCGCCGGTCCACCGTCTCTTCCGCAACTTCGCGGCAAAATACGGCCAAATCTTCTCCCTACGTTACGGCTCTCGCCAAGTCGTCGTGATCTCTTCTTTGCCTCTAGTCAGAGAATGCTTCACCGGTCAGAACGACGTCATTTTAACGAACCGGCCGCATTTTCTGACCGCCAAATACGTTGCCTACGACTACACCACGATCGGAACCGCGCCTTACGGCGACCATTGGCGTAATCTCCGCCGTATTTGCTCTCTTGAG…	ATGGTTTACGTTTTGGTTTTGGTGCCACTCGTATTGTTTCTATTAGCGTACAAATTCTTATTCTCAACCAAGACTAAGCGTTACAATCTCCCACCAGGACCAACTCCCTTTCCCATCGTCGGCAATCTCCACCTCGTGAAACCGCCGGTCCACCGTCTCTTCCGCAACTTCGCGGCAAAATACGGCCAAATCTTCTCCCTACGTTACGGCTCTCGCCAAGTCGTCGTGATCTCTTCTTTGCCTCTAGTCAGAGAATGCTTCACCGGTCAGAACGACGTCATTTTAACGAACCGGCCGCATTTTCTGACCGCCAAATACGTTGCCTACGACTACACCACGATCGGAACCGCGCCTTACGGCGACCATTGGCGTAATCTCCGCCGTATTTGCTCTCTTGAG…	MVYVLVLVPLVLFLLAYKFLFSTKTKRYNLPPGPTPFPIVGNLHLVKPPVHRLFRNFAAKYGQIFSLRYGSRQVVVISSLPLVRECFTGQNDVILTNRPHFLTAKYVAYDYTTIGTAPYGDHWRNLRRICSLEILSSHRLTGFLSVRRDEIQRLLTRLSRDYNGRVVELEPLLADLTFNNIVRMVTGRRYYGDQVHNEEEANLFKKLVTQINDNSGASHPGDYLPILKVLGHGYEKKVKALGEAMDNLLQQLLDDCRRDGESNTMLSHLLTLQQDQPMYYSDVIIKGLMLSMMLAGTDTSAVTLEWAMANLLKNPEVLKKARAEIDDKIGQERLVDEPDIVNLPYLQNIVSETFRLCPAAPLLVPRSPSEDLKIGGYDVPRGTIVLVNSWAIHRDPKLW…
	BniB08g019200	ATGGTGCTAAAGGTGTACGGACCTCACTTTGCTTCACCAAAGCGGGCTCTGGTAACGCTCATAGAGAAGGGCGTCGCCTTCGAGACCGTCCCCGTCGATCTCATGAAAGGAGAACACAAACAGCCTGCTTATCTCGCTTTACAGGTTTCCTTCCTCGACCTCTTCTGTTTCTTTCTTTCTTTCCATTTCAAGATTCTGATCATCTTCTTTGTTACTCCCCATGCAGCCTTTTGGTACCGTCCCTGCTGTTGTCGATGGTGACTACAAAATCTTCGGTACGACTTCGTTTAAGATCACCACAACACATCTTAAGTTTCTTTAAAAAAATTATTATTATTATTATTATTATTATTATTTTTATTTTTATTTATTTTTATGAACTTCTTTTCTTTATACCTT…	ATGGTGCTAAAGGTGTACGGACCTCACTTTGCTTCACCAAAGCGGGCTCTGGTAACGCTCATAGAGAAGGGCGTCGCCTTCGAGACCGTCCCCGTCGATCTCATGAAAGGAGAACACAAACAGCCTGCTTATCTCGCTTTACAGCCTTTTGGTACCGTCCCTGCTGTTGTCGATGGTGACTACAAAATCTTCGAGTCACGTGCCGTCATGAGGTACGTCGCTGAGAAGTACAGGTCGCAAGGACCTGACCTTTTGGGAAAAACCGTGGAAGAAAGAGGACAAGTCGAGCAATGGCTCGACGTGGAGGCGACCACTTACCACCCACCGCTACTGAACCTGACACTTCACATAATGTTCGCGTCGGTCATGGGATTCCCATCTGACGAGAAGCTGATCAAG…	MVLKVYGPHFASPKRALVTLIEKGVAFETVPVDLMKGEHKQPAYLALQPFGTVPAVVDGDYKIFESRAVMRYVAEKYRSQGPDLLGKTVEERGQVEQWLDVEATTYHPPLLNLTLHIMFASVMGFPSDEKLIKESEEKLSAVLDVYEAHLSKSKYLAGDFVSLADLAHLPFTDYLVGPIGKAYMIKDRKHVSAWWNDISSRPAWKETLEKYSFPA-
	BniB08g019210	ATGGTGTTGACAATCTATGCGCCTTTATTCGCATCTTCCAAAAGAGCTGTAGTGACGTTAGTGGAGAAGGGAGTAGAGTTCGAGAGTGTCAATGTCGATCTCTTGAAAGGAGAGCAGAGGCAGCCCGAGTATATTGCCATTCAGGTTCCTCATCTCTCTCTCTCTTCTTCAACCATGTTTCTTTTATGCATTGTTCTTGATTTGTTCTTCTCTGATGCAGCCTTTCGGTAAGATCCCTGTGCTCGTTGACGGTGACTACAAAATCTTTGGTACACTTCTTCTCCTTTTCTCTCCAGATTCTTTATATCATACTCTTGATCAACACACGAGTGAAATGAAATTAGTTCTTGAATTATGAAATGAGTTCTTGAGTTATGAATATATAGATATAGTAAGAAT…	ATGGTGTTGACAATCTATGCGCCTTTATTCGCATCTTCCAAAAGAGCTGTAGTGACGTTAGTGGAGAAGGGAGTAGAGTTCGAGAGTGTCAATGTCGATCTCTTGAAAGGAGAGCAGAGGCAGCCCGAGTATATTGCCATTCAGCCTTTCGGTAAGATCCCTGTGCTCGTTGACGGTGACTACAAAATCTTTGAGTCTCGTGCCATCATGAGGTACATAGCAGAGAAATACAGATCACAAGGACCAGACTTGTTAGGGAAGACAATTGAAGAGAGAGGACAAGTGGAGCAATGGCTTGACGTGGAAGCAACAAGCTACCATCCACCACTACTAGCACTAACTCTGAACATTGTCTTTGCACCACTCATGGGCTTTCCTGCTGATGAGAAAGTTATAAAA…	MVLTIYAPLFASSKRAVVTLVEKGVEFESVNVDLLKGEQRQPEYIAIQPFGKIPVLVDGDYKIFESRAIMRYIAEKYRSQGPDLLGKTIEERGQVEQWLDVEATSYHPPLLALTLNIVFAPLMGFPADEKVIKESEEKLGEVLDVYEAQLSKNEYLAGDFVSLADLAHLPFTEYLVGAIGKAYMIKDRKHVSAWWDKISNRAAWKEVTEKYALPV-
	BniB08g028010	ATGGCGGCTTCTTCTCTGCAATCCCTAAACCTCACATTGTCCAAAACCTTAGCATCTCCCAACACCTCCCTTTCCTTCCGATCTCCATTCCTCAGATTCGATTCCGCCTCCGCATCTCCCACTTTCAAACCCCTCGTCACTCGAACCGCATCCTCATCCTTCATCACCCGCTCCGCCGCCGCGCCGCAGGAGAGAAAGACCTTCCACGGTCTCTGCTACGTCGTCGGCGACAACATCGACACCGACCAGATCATCCCCGCCGAGTACCTCACCCTCGTCCCCTCCAACCCCGACGAGTACGAGAAGCTCGGCTCCTACGCCCTGATCGGACTCCCGGCCTCCTACAAGGACCGGTTCGTCGAGCCCGGGGAGACGAAGACGAAGTACTCGATCATCATC…	ATGGCGGCTTCTTCTCTGCAATCCCTAAACCTCACATTGTCCAAAACCTTAGCATCTCCCAACACCTCCCTTTCCTTCCGATCTCCATTCCTCAGATTCGATTCCGCCTCCGCATCTCCCACTTTCAAACCCCTCGTCACTCGAACCGCATCCTCATCCTTCATCACCCGCTCCGCCGCCGCGCCGCAGGAGAGAAAGACCTTCCACGGTCTCTGCTACGTCGTCGGCGACAACATCGACACCGACCAGATCATCCCCGCCGAGTACCTCACCCTCGTCCCCTCCAACCCCGACGAGTACGAGAAGCTCGGCTCCTACGCCCTGATCGGACTCCCGGCCTCCTACAAGGACCGGTTCGTCGAGCCCGGGGAGACGAAGACGAAGTACTCGATCATCATC…	MAASSLQSLNLTLSKTLASPNTSLSFRSPFLRFDSASASPTFKPLVTRTASSSFITRSAAAPQERKTFHGLCYVVGDNIDTDQIIPAEYLTLVPSNPDEYEKLGSYALIGLPASYKDRFVEPGETKTKYSIIIGGENFGCGSSREHAPVCLGAAGAKAVVAQSYARIFFRNSVATGEVYPLDSEVRVCDECKTGDVATVELREGDSVLINHTTGKEYRLKPIGDAGPVIDAGGIFAYARKAGMIPSAAA
	BniB08g036280	ATGGCTTTGTCACTTCTGACATACTCCATTATGATCCCCACCCGGCCAGTACCTATTCGATCTTCCCTGCCCTCCCTCCGCCTAACTTTTCCGCATAAAACACCAACCTCGTTCATCTCATGTTGCTCCTCTGTGTCTGAAAAGGCGGAAACTAGTGGTATTGACCTCAAACCCGACGTGGAACGGTGGCCAAAGTACATACCCAACAAGCTCCCCAACAAGAATTATGTAAGAGTACTCGACACGACGCTCCGTGATGGCGAACAATCTCCAGGTGGAGCCCTTACTCCACCGCAGAAGCTAGAGATTGCTCGGAAACTCGCTGAACTCCGAGTAGACGTCATGGATGTTGGTTTTCCAGCATCGTCTGAGGAAGAGTTAGAAGCCGTTAAAACAATC…	ATGGCTTTGTCACTTCTGACATACTCCATTATGATCCCCACCCGGCCAGTACCTATTCGATCTTCCCTGCCCTCCCTCCGCCTAACTTTTCCGCATAAAACACCAACCTCGTTCATCTCATGTTGCTCCTCTGTGTCTGAAAAGGCGGAAACTAGTGGTATTGACCTCAAACCCGACGTGGAACGGTGGCCAAAGTACATACCCAACAAGCTCCCCAACAAGAATTATGTAAGAGTACTCGACACGACGCTCCGTGATGGCGAACAATCTCCAGGTGGAGCCCTTACTCCACCGCAGAAGCTAGAGATTGCTCGGAAACTCGCTGAACTCCGAGTAGACGTCATGGATGTTGGTTTTCCAGCATCGTCTGAGGAAGAGTTAGAAGCCGTTAAAACAATC…	MALSLLTYSIMIPTRPVPIRSSLPSLRLTFPHKTPTSFISCCSSVSEKAETSGIDLKPDVERWPKYIPNKLPNKNYVRVLDTTLRDGEQSPGGALTPPQKLEIARKLAELRVDVMDVGFPASSEEELEAVKTIAKTVGNEVDEETGYVPVICVISRCKDRDIEAAWEALKYAKRPRISIFISTSEIHMKYKLKKTKQEVIEMAKRSIRFAKKIGFSDIQFGCEDGGRSEKDFLCKIMGEAIKEGAKTVALADTVGINMPQEFGEIVTYLKANTPGIDDVVIGLHCHNDLGLATANTIAGMRAGARQVEVTVNGIGERSGNASLEEIVMALKCRGAYVMDGIYTTIDTRHIMAASKMVQEYTGLHVQPHKPIVGYNYFVHDSGIHQDGMSKYGSTYEIFS…
	BniB08g037040	ATGGGCGTGATTACTCCTATTGAGACTCTGTTGTTAAAGTCTCAACATCGTCTTCTTCAACCTCGAGATCATTCCTACCCTCTGGTTTTTCACAACACTCGAAGAGTTACAAATTTCCCGCGCAACAGCTTCTCACCTTTTTCTCTAGGTTTTTTCTTTCTCCTTTGTTTAAACATTTTTTTTGGTGCAAGTTTAAACATTATCTAAAAGCTGTTTTTGTTGAAAGTGGTAATTTTTAGATGTGTATAAGTCTTCAGTTCTTGTTTTTTGATGAGTTAAATTCTCGTGCAGGATCATCATCTGTAGATTTTCCATTACGCAGTGATCCGATTTCGCAAAGTAAGTACATATATTATAGGAACAATTCTGCATTTGTTTTCTTTTGGAGTGAAGCAATTT…	ATGGGCGTGATTACTCCTATTGAGACTCTGTTGTTAAAGTCTCAACATCGTCTTCTTCAACCTCGAGATCATTCCTACCCTCTGGTTTTTCACAACACTCGAAGAGTTACAAATTTCCCGCGCAACAGCTTCTCACCTTTTTCTCTAGGATCATCATCTGTAGATTTTCCATTACGCAGTGATCCGATTTCGCAAAATGATAGGTCGAGTTATCCTTGGCAGAGAAACGTCTCAGAATCTGACACAAACGAGATCTATAATAAGAAAGTTTCTATAATGGAAACATTAAAGCAAGCCAACTCTTTTATTCCTCATGTGATTCTCTCAAGTACAATTTTAGCTCTTCTCCATCCACCTTCTTTCACATGGTTCAAGCCAAGGTACTTTGTGCCTGGCCTA…	MGVITPIETLLLKSQHRLLQPRDHSYPLVFHNTRRVTNFPRNSFSPFSLGSSSVDFPLRSDPISQNDRSSYPWQRNVSESDTNEIYNKKVSIMETLKQANSFIPHVILSSTILALLHPPSFTWFKPRYFVPGLGFMMFAVGINSNERDFLEALKRPDAIFAGYIGQYLIKPLLGYMFGVIAVSLFNLPTPIGAGIMLVSCVSGAQLSNYTTFLTDPSLAPLSIVMTSISTATAALVTPMLSLLLIGKKLPVDVIGMISSILQVVVTPIAAGLLLNRLLPRLSNAIKPFLPALTLIDMACCIGAPLALNIDSILSPFGATILFLVIMFHLLAFIAGYFFTGFFFCKAPDVKALQRTLSYETGMQSSLLALALATKFFQDPLVGVPPAISTVVMSLMGVSL…
	BniB08g039120	ATGCGTGTGATTTCGGAGCAATTAACAGAATTGGATGTGATGGTGAGAAGAATGATACTAGAGAGTTTTGGGATAGAGAAATACGTTGAGGAACATCTTAATCCTACAAATTATCTTTTTCGAATGATTAAGTATGCAACACCGTCTTCTGATGATGAAGAGACGAAGTTAGGTTTACCTTCTCATACAGATAAGAACATCATGACAATACTTCATCGGTATCAAGTTGATGGTTTGGAAATTAAGACCAAAGACAAAAAATGGATAAAAGTGAAACTATCATCATTATTATTCTTTTCTTTTTTTTTGAAAAAGTCATCATTATTATTCTTTCATTGTCATGGTTGGATATTCTATGTGTGTAAGTCCTTCCAACTTCCTTCTAATTTATATATTCCG…	ATGCGTGTGATTTCGGAGCAATTAACAGAATTGGATGTGATGGTGAGAAGAATGATACTAGAGAGTTTTGGGATAGAGAAATACGTTGAGGAACATCTTAATCCTACAAATTATCTTTTTCGAATGATTAAGTATGCAACACCGTCTTCTGATGATGAAGAGACGAAGTTAGGTTTACCTTCTCATACAGATAAGAACATCATGACAATACTTCATCGGTATCAAGTTGATGGTTTGGAAATTAAGACCAAAGACAAAAAATGGATAAAAGCATTTTTGAATGGTCGACTATCTTTTGCATATCACCGAGTCGTGATGACACCAAATAAGACAAGGTATTCGATTGCATTGTTCTCGACTCCAAAGTTGGGAGTTATCATAGATTCACCTGAAGAACTT…	MRVISEQLTELDVMVRRMILESFGIEKYVEEHLNPTNYLFRMIKYATPSSDDEETKLGLPSHTDKNIMTILHRYQVDGLEIKTKDKKWIKAFLNGRLSFAYHRVVMTPNKTRYSIALFSTPKLGVIIDSPEELIDEEHPLIDFSDQILRPGTSKWDKVKADVRKALEDYGCFEAFFDKVSVDLDKSVFEAMEELFDLPSFGIDEANLVEKVNDFTRQIWPDHGNKRISGTMHGFSEQLAKLDVMVRRMLIESFGIEKYIDEHLNSTNYLFRMMKYTAPPDDDGGNEETKLGLRSHTDKNILTILHQYQVDGLEIQTKDEKWIKVKPSHHHSFIIMVGDSLCAFLNGRLSSPYHRVLMTAKKTRYSTALFSVPKSGVIIDSPEELVDEEHPRMFKPFEYN…
	BniB08g040770	ATGGAATATAAGGTTTTCACCTCAGTTTATATCACATTTTGTATCACTCTGAGTATTTTGGTTCTCATAAAATGGTTCTTAGCACTTCTTCTTGGGGGTGATGGTGGTGGTAAGCAGCTGCCTCCATGCCCGCCGGGAATTCCCATGATGGGGAACTTAGTGGGAATGCTCATGAACAGACCAACTTCCAAGTGGATAGTTCGTGTGATGAACGATATGAAGACGGATATAGCTTGCTTCCGCTTCGGTCGTGTTCATGTCATTGCTATAACATCTGATGAGATTGCCCGTGAAGTCGTCAAGGAGAAAGACTCGGTGTTTGCCGACAGGCCGGACTCTTACTCCGCCGAATACATAAGTTGCGGGTAACTGTATTTCATAATAGTGATATTTATCCCC…	ATGGAATATAAGGTTTTCACCTCAGTTTATATCACATTTTGTATCACTCTGAGTATTTTGGTTCTCATAAAATGGTTCTTAGCACTTCTTCTTGGGGGTGATGGTGGTGGTAAGCAGCTGCCTCCATGCCCGCCGGGAATTCCCATGATGGGGAACTTAGTGGGAATGCTCATGAACAGACCAACTTCCAAGTGGATAGTTCGTGTGATGAACGATATGAAGACGGATATAGCTTGCTTCCGCTTCGGTCGTGTTCATGTCATTGCTATAACATCTGATGAGATTGCCCGTGAAGTCGTCAAGGAGAAAGACTCGGTGTTTGCCGACAGGCCGGACTCTTACTCCGCCGAATACATAAGTTGCGGGTACAAGGGGGTGGTGTTTGATGAGTACGGCGAG…	MEYKVFTSVYITFCITLSILVLIKWFLALLLGGDGGGKQLPPCPPGIPMMGNLVGMLMNRPTSKWIVRVMNDMKTDIACFRFGRVHVIAITSDEIAREVVKEKDSVFADRPDSYSAEYISCGYKGVVFDEYGERQMKMKKVMTSELMSTKALDLLRDVRNMESDNLLAHVLNLYKKGGLVNVRDIVCTHTHNVKMRLLFGRKHFKETTKDGSLGPMEKEHFDAIFKALDCFFSFYIADYYSFFRGWNLQGEEVVLREAVDVIAKYNKMIIDEKIDLWRKTNDANKNVPKDWLDILFTLKDDKGKPLLTPEEITHLSIDLDVVGIDNAVNVIEWTLAEMLNQREILEQAVEEIDRVVGKDRLVQESDVPNLNYVKACIRETLRLHPTNPFLVPHMARQDT…
	BniB08g040830	ATGAGTACGGCGAGAGACAAATGAAGATGAAGAAAGTGATGACGTCCGAGTTAATGTCCACAAAGGCTTTAGACTTATTACGCGACGTTAGAAACATGGAATCCGACAACCTCCTCGCACATGTTCTTAACCTATACAAGAAAGGTGGGTTAGTGAACGTGAGGGATATCGTATGCACCCACACTCACAATGTGAAGATGAGACTCTTGTTTGGTCGAAAGCATTTCAAGGAAACGACAAAGGATGGGAGCCTCCGTCCGATGGAGAAAGAACATTTTGACGCCATTTTCAAGGCTCTTGATTGTTTCTTTAGCTTTTACATAGCTGATTACTACTCTTTCTTTAGAGGATGGAATCTTCAAGGTGAGGAGGTTGTGTTAAGAGAAGCCGTTGATGTTA…	ATGAAGATGAAGAAAGTGATGACGTCCGAGTTAATGTCCACAAAGGCTTTAGACTTATTACGCGACGTTAGAAACATGGAATCCGACAACCTCCTCGCACATGTTCTTAACCTATACAAGAAAGGTGGGTTAGTGAACGTGAGGGATATCGTATGCACCCACACTCACAATGTGAAGATGAGACTCTTGTTTGGTCGAAAGCATTTCAAGGAAACGACAAAGGATGGGAGCCTCCGTCCGATGGAGAAAGAACATTTTGACGCCATTTTCAAGGCTCTTGATTGTTTCTTTAGCTTTTACATAGCTGATTACTACTCTTTCTTTAGAGGATGGAATCTTCAAGGTGAGGAGGTTGTGTTAAGAGAAGCCGTTGATGTTATCGCTAAGTACAACAAAATG…	MKMKKVMTSELMSTKALDLLRDVRNMESDNLLAHVLNLYKKGGLVNVRDIVCTHTHNVKMRLLFGRKHFKETTKDGSLRPMEKEHFDAIFKALDCFFSFYIADYYSFFRGWNLQGEEVVLREAVDVIAKYNKMIIDEKIDLWRKTYDANKNVPKDWLDILFTLKDDKGKPLLTPEEITHLSIDLDVVGIDNAVNVIEWTLAEMLNQREILEQAVEEIDRVVGKDRLVQESDVPNLNYVKACIRETLRLHPTNPFLVPHMARQDTTLAGYFVPKGSHILVSRPGIGRNPKTWDEPLIYKPERHLTGDEVMLTEPDMRLVSFGTGRRGCVGTKLGTYMIVTLLGRLLQGFDWTIPPQTTGKVELVESKENLFMAKPLLACVEPRLDLNMYPKIRTRQA-
	BniB08g040860	ATGGAATATAAGGTTTTCACCTCATTTTATATCACATTTTGTATCACTCTGAGTATTTTGGTTCTCATAAAATGGTTCTTAGCACTTCTTCTTGGGGGTGATGGTGGTGGTAAGCAGCTGCCTCCATGCCCGCAGGGAATTCCCATGATGGGGAACTTAGTGGGAATGCTCATGAACAGACCAACTTCCAAGTGGATAGTTCATGTGATGAACGATATGAAGACGGATATAGCTTGCTTCCGCTTCGGTCGTGTTCATGTCATTGCTATAACGTCTGATGAGATTGCCCGTGAAGTCGTCAAGGAGAAAGACTCGGTGTTTGCCGACAGACCGGACTCTTACTCCGCCGAATACATAAGTTGCGGGTAACTGTATTTCACTAGATTTTGATCCCCACAT…	ATGGAATATAAGGTTTTCACCTCATTTTATATCACATTTTGTATCACTCTGAGTATTTTGGTTCTCATAAAATGGTTCTTAGCACTTCTTCTTGGGGGTGATGGTGGTGGTAAGCAGCTGCCTCCATGCCCGCAGGGAATTCCCATGATGGGGAACTTAGTGGGAATGCTCATGAACAGACCAACTTCCAAGTGGATAGTTCATGTGATGAACGATATGAAGACGGATATAGCTTGCTTCCGCTTCGGTCGTGTTCATGTCATTGCTATAACGTCTGATGAGATTGCCCGTGAAGTCGTCAAGGAGAAAGACTCGGTGTTTGCCGACAGACCGGACTCTTACTCCGCCGAATACATAAGTTGCGGGTACAAGGGGGTGGTGTTTGATGAGTACTGCGAG…	MEYKVFTSFYITFCITLSILVLIKWFLALLLGGDGGGKQLPPCPQGIPMMGNLVGMLMNRPTSKWIVHVMNDMKTDIACFRFGRVHVIAITSDEIAREVVKEKDSVFADRPDSYSAEYISCGYKGVVFDEYCERQMQMKKVMTSELMSTKALDLLSDVRNLESDNLLAHVLNLYKKGGLVNVRDIVCTHTHNVKMRLLFGRKHFKETTKDGSLGPMEKEHFDAIFKALDCFFSFYIADYYSFFRGWNLQGEEVVLKEAVDVIAKYNKMIIDEKIDLWRKNYDANKNVPKDWLDILFTLKDDKGKPLLTPEEITHLSIDLDVVGIDNAVNVVEWTLAEMLNQREILEQAVEEIDRVVGKDRLVQESDVPNLNYVKACIRETLRLHPTNPFLVPHMARQDT…
	BniB08g040890	ATGAAGATGAAGAAAGTGATGACGTCCGAGTTAATGTCCACAAAGGCTTTAGACTTATTACGCGTCGTTAGAAACTTGGAATCCGACAACCTCCTCGCACGTGTCCTTAACCTATACAAGAAAGGTGGGTTAGTGAACGTAAGGGATATCGTATGCACCCACACTCACAATGTGGAGATGAGACTCTTGTTTGGTCGAAAGCATTTCAAGGAAACGACAAAGGATGGGAGCCTCGGTCCGATGGAGAAAGAACATTTTGACGCCATTTTCAAGGCTCTTGATTGTTTCTTTAGCTTTTACATAGCTGATTACTACTCTTTCTTTAGAGGATGGAATCTTCAAGGTGAGGAGGTTGTGTTAAGAGAAGCCGTTGATGTTATTGCTAAGTACAACAAAATG…	ATGAAGATGAAGAAAGTGATGACGTCCGAGTTAATGTCCACAAAGGCTTTAGACTTATTACGCGTCGTTAGAAACTTGGAATCCGACAACCTCCTCGCACGTGTCCTTAACCTATACAAGAAAGGTGGGTTAGTGAACGTAAGGGATATCGTATGCACCCACACTCACAATGTGGAGATGAGACTCTTGTTTGGTCGAAAGCATTTCAAGGAAACGACAAAGGATGGGAGCCTCGGTCCGATGGAGAAAGAACATTTTGACGCCATTTTCAAGGCTCTTGATTGTTTCTTTAGCTTTTACATAGCTGATTACTACTCTTTCTTTAGAGGATGGAATCTTCAAGGTGAGGAGGTTGTGTTAAGAGAAGCCGTTGATGTTATTGCTAAGTACAACAAAATG…	MKMKKVMTSELMSTKALDLLRVVRNLESDNLLARVLNLYKKGGLVNVRDIVCTHTHNVEMRLLFGRKHFKETTKDGSLGPMEKEHFDAIFKALDCFFSFYIADYYSFFRGWNLQGEEVVLREAVDVIAKYNKMIIDEKIDLWRKNYDANKNVSKDWLDILFTLKDDKGKPLLTPEEITHLSTDLDVVGIDNAVNILEQAVEEIDRVVGKDRLVQESDVPNLNYVKACIRETFRLHPTNPFLVPHMARQDTTLAGYFVPKGSHILVSRPGIGRNPKTWDEPLIYKPERHLTGDEVMLTEPDMRLVSFGTGRRGCVGTKRGTYMIVTLLGRLLQGFDWTIPPQTTGKVELVESKENLFMAKPLLACVEPRLDLNMYPKIWTRQA-
	BniB08g045740	ATGTCTATAAATTGGGCATTCCATCACTTTTCTCAGCACGGAAGAAAGAAAACCAACTTGGATCTCGTCGAATCAAGAAAAACTCTTAAGGTAGTTTTCTTATGATTTTTGAATGTTTTCTTGTGATTTTTTCAATGTTTTCTTTTGTTGTGATAATTAAAGAGCGGAGTAACTTTTTGAAATGTATTTTTGGATGCACAAAAGGCAAAAAAAAAAGAAAGAATGGGTGCAGACACTCCTCAACTTCCAGTCATCTATCTCTCGGACCAAACCCTGAAACCAGGAAGTGAGAAGTGGGCTGAAGTCAGGAGTGGTGTCCGTAAAGCTCTCGAAGAATATGGTGCTTTCGAGGTGTCATATGATAGAGTGACAGAGGAGCTTAAGAAGTCAGTTTTGGAT…	ATGTCTATAAATTGGGCATTCCATCACTTTTCTCAGCACGGAAGAAAGAAAACCAACTTGGATCTCGTCGAATCAAGAAAAACTCTTAAGGCAAAAAAAAAAGAAAGAATGGGTGCAGACACTCCTCAACTTCCAGTCATCTATCTCTCGGACCAAACCCTGAAACCAGGAAGTGAGAAGTGGGCTGAAGTCAGGAGTGGTGTCCGTAAAGCTCTCGAAGAATATGGTGCTTTCGAGGTGTCATATGATAGAGTGACAGAGGAGCTTAAGAAGTCAGTTTTGGATGCCATGATAGAGCTTTTCGAGTTACCAGTTGAGGCTAAACAGAGAAACGTGTCTCCGAAACCCTACATGGGATATTCGACTCATAATGGTCTCTCTGAGAGTCTAGGGATCCAG…	MSINWAFHHFSQHGRKKTNLDLVESRKTLKAKKKERMGADTPQLPVIYLSDQTLKPGSEKWAEVRSGVRKALEEYGAFEVSYDRVTEELKKSVLDAMIELFELPVEAKQRNVSPKPYMGYSTHNGLSESLGIQDPNVLEKVNEFTQLLRPDCEGNKSMSETIQKFSEKLVELDVTVKRMVIQSFGIENYFDEHLKSLKNYRMRLMKYVAPPDVDAKDADDGANTNLNANADADAGAGDIANGIANVHIDEDVNAKGDVGTGGGDANHNGDDANTGDSASVKSNVDVGTDVNVKASVGADVNVGTIADANANIGTLSSANVGVGDSVKANGGADDEEKKLGLPSHTDKNLLTVLYQYEIDGLEVLTKDEKWIRLKPAHNSFVVIAGDSLYALMNGRLSRP…
	BniB08g045800	ATGGATTCAGACTCTCTTCTTCCTCTCTCTCAATCTCTTCAGCTCCCAGTCATCGATTTCTCCGATCAGAACTTAACACCAGGAACCTCAAAGTGGGATGAAGTGAAGGCTGATGTCCGTAAAGCGTTAGAAGACTATGGCTGTTTCCAAGCTTTCGTTGACAAAGTGTCAAACATAGAGCTTGACAAGTCTGTTTTTGAAGCCATGGAAGAGCTGTTCGATCTGCCGGTTAAGACCAAACAGAGAAACGTGTCCTCTAAACCCTTTCATGGGTATCTAAGTCACGACCTTTACCAGAGTTTAGGGATCGAAGAAGCTAATGTTGCAGAGAAAGTCAACGACTTTACTCAACTGCTATGGCCTGATCAAGGAAACAAGAGTATTAGGTATGAAACTTAA…	ATGGATTCAGACTCTCTTCTTCCTCTCTCTCAATCTCTTCAGCTCCCAGTCATCGATTTCTCCGATCAGAACTTAACACCAGGAACCTCAAAGTGGGATGAAGTGAAGGCTGATGTCCGTAAAGCGTTAGAAGACTATGGCTGTTTCCAAGCTTTCGTTGACAAAGTGTCAAACATAGAGCTTGACAAGTCTGTTTTTGAAGCCATGGAAGAGCTGTTCGATCTGCCGGTTAAGACCAAACAGAGAAACGTGTCCTCTAAACCCTTTCATGGGTATCTAAGTCACGACCTTTACCAGAGTTTAGGGATCGAAGAAGCTAATGTTGCAGAGAAAGTCAACGACTTTACTCAACTGCTATGGCCTGATCAAGGAAACAAGAGTATTAGTGAGACGATGAAC…	MDSDSLLPLSQSLQLPVIDFSDQNLTPGTSKWDEVKADVRKALEDYGCFQAFVDKVSNIELDKSVFEAMEELFDLPVKTKQRNVSSKPFHGYLSHDLYQSLGIEEANVAEKVNDFTQLLWPDQGNKSISETMNKFSEQLVELDVMVRRMIMESFGVEKYLDEHLNSTNYLFRMMKYTAPPEDDVEATKLGLRSHTDKNVITILHQYQVDGLEIMTKDEKWIRVRPSQHSFIIMVGDSLCALLNGRLHSPYHRVMMAKKTRYSTAMFSIPNPGVIIDSPEELVDQEHPRLFKPFEYIDFLNFFHSEAGRRVESTLHAFCAV-
	BniB08g047710	ATGGCAGCAACAGTTTCTTCTCCAGGGATCACAAGCTCTGCTTTCTCTCGTTCTGTGATCTCTTCAAAACCCAAAGGTGAAATTAAGTTTCGATTTCTCTATATGAAATATTCAGACTTTTGGCGAGAATCTGAGAAATTGTTTGATGGGTCAACATGGGTTTGAGTTATTTACATCAAATTCGATTCCTTTGTGTACGAATTTGCAATCTAATTAAAGCTTTTTAAATCTAATTACAGTATCACAAATCGGTTCGTTGAAGTCATTAGACCGTGTTAATGTCACTCCAATGTCTCTGAATCTATCAGGGAAGCGATCATCCATCAAACCCTTAAACGCTGAGCCAAAGAGGAACGACTCTATGGTCCCTCTTGCAGCAACAATGGTAGCAGAAGTCAC…	ATGGCAGCAACAGTTTCTTCTCCAGGGATCACAAGCTCTGCTTTCTCTCGTTCTGTGATCTCTTCAAAACCCAAAGTATCACAAATCGGTTCGTTGAAGTCATTAGACCGTGTTAATGTCACTCCAATGTCTCTGAATCTATCAGGGAAGCGATCATCCATCAAACCCTTAAACGCTGAGCCAAAGAGGAACGACTCTATGGTCCCTCTTGCAGCAACAATGGTAGCAGAAGTCACAGAGGAAGTAGAAGTAGCAGTAGAGACAGAGGATTTTCAAGAACTTGCTAAGAAGCTAGAGAATGCTTCACCTCTTGAGATTATGAATAACGCTCTCGAAATGTTTGGGAACGATATAGCCATCGCATTCAGTGGTGCAGAAGATGTTGCTCTGATTGAGTAT…	MAATVSSPGITSSAFSRSVISSKPKVSQIGSLKSLDRVNVTPMSLNLSGKRSSIKPLNAEPKRNDSMVPLAATMVAEVTEEVEVAVETEDFQELAKKLENASPLEIMNNALEMFGNDIAIAFSGAEDVALIEYAHLTGRPYRVFSLDTGRLNPETYRFFDAVEKHYGIRIEYMFPDSAEVQGLVRSKGLFSFYEDGHQECCRVRKVRPLRRALKGLRAWITGQRKDQSPGTRSEIPVVQVDPVFEGLDGGAGSLVKWNPVANVEGSDVWSFLRTMDVPVNTLHAAGYVSIGCEPCTRAVLPGQHEREGRWWWEDAKAKECGLHKGNIKENAKGDNVNGESKPVVEDIFKSENLVALSRQGIENLMKLDNRREPWVVVLYAPWCPFCQAMEASYDELADK…
	BniB08g049400	ATGACATCTCATCACTTGGGTGGAAAGAACCTGGACAATGAAGCCATAAGGAGATCAGACATTGAATCCCTCATCAAAGCTCTCAAGGAGTCTGGTAACAAACTTGGAAACACTCTTGGTATCTCTTATAGTGCACATACTCTATCTAGTACTCCGGATAGGTTGCTAGAATTGAGTAAGAACACTTATAGTGATGATAAGACTAAGAATGTGCCTGATAGGTTGCTAGAAGTCATAGAAAAATTGCGAAATGGAATTGATTATCCTAGAACTCATATTGCTCAAAACATGATAAAACCTTTGATTGTTGATTCTGGTGCATCTCATCATATGATAAGTGATAAGAGTCTCATTGAAAATATTGAACCTGCTCAAGGAAATGTTGTAATTGCGAATGGA…	ATGACATCTCATCACTTGGGTGGAAAGAACCTGGACAATGAAGCCATAAGGAGATCAGACATTGAATCCCTCATCAAAGCTCTCAAGGAGTCTGTTTCAACATCTGTAGATTTTCCATTACGCAGTGATCCGATTTTGCAAAATGGTAGGTCGAGTTATCCTTGGCGGAGATATGTCTCAGAATCTGACTCAGCCGAGGTCTACAATCAGAAGGTTTCTATAATGGAAGTGCTCAAGAAAGCCAACTCTTTTATTCCTCATGTGATTCTCTCAAGTACAATCTTAGCTCTTCTCTATCCACCTTCTTTCACATGGTTCAAGCCAAGGTACTTTGTGCCTGGCTTAGGGTTCATGATGTTTGCTGTTGGAATCAACTCCAACGAACGAGACTTTCTTGAA…	MTSHHLGGKNLDNEAIRRSDIESLIKALKESVSTSVDFPLRSDPILQNGRSSYPWRRYVSESDSAEVYNQKVSIMEVLKKANSFIPHVILSSTILALLYPPSFTWFKPRYFVPGLGFMMFAVGINSNERDFLEALKRPDAIFAGYIGQYLIKPLLGYMFGLIAVSLFKLPTPIGAGIMLVSCVSGAQLSNYTTFLTDPSLAPLSIVMTSISTATAALVTPMLSLLLIGKKLPVDVVGMISSILQVVVTPIAAGLLLNRFFPRLSNAIKPFLPALTLIDMACCIGAPLALNIDSILSPFGATILLLVITFHLLAFIAGYFLTGLFFSKTPDVKALQRTLSYETGMQSSLLALALATKFFQDPLVGVPPAISTVVMSLMGVSLVTIWKKQKGVVT-
	BniB08g051390	ATGGACGAGGCTGGACACACCCGACCTGATGTAGCCGGGGTAAACCACCCGCACGGATGGATGGTGAAGCTCGGACGATACGCGGTCTGGCACACCCGGGGTAAGCTACCCCGCACGGGACGAGACCACAGATCAACACGAGACACGCGGATCGGCATACGCGGGTTGGACGAGCTGCTCCTTACCCGGATATCGGCCATCTTCTTCCTTTTTGCTGTATTCTGATTGGTTGAAGATTTAATGACCTCAAGGACTTTTTAGACTTTCTCATTTATGTTTTTAGGGCTCTCTACGCCTCATATAAATACTTTTGTAATCTCCTTTGTGAGATCTAACTTCTTTTCTCTTAAGAACACATTTGGATCTTGAAGAAAGTTTGAATCTTGAATTTTTTTTCAT…	ATGGACGAGGCTGGACACACCCGACCTGATGTAGCCGGGGTAAACCACCCGCACGGATGGATGGTGAAGCTCGGACGATACGCGGTCTGGCACACCCGGGGGAGGAACAAACCAGTGTTCCGGTGGATACATTCCCTTATGGAAGAACTCAACACCGATATTGCATGTATCCGCCTCGCCAATACCCACGTGATCCCTGTGTCTTCCTCACGGATTGCACGGGAGATTCTGAAGAAGCAAGACTCCATTTTTGCCACTAGACCACTAACCATGGGCTCTGAGTACTGCAGCCACGTGAAAGAAGATGAGAAGAGTGGTGGCAACTCACGTGACAAGTCCGAAGAGCTTCAAATAGATGCTCAAAAGGGAACCGAAGAAGCCGATAACCTCGTTCGGTAC…	MDEAGHTRPDVAGVNHPHGWMVKLGRYAVWHTRGRNKPVFRWIHSLMEELNTDIACIRLANTHVIPVSSSRIAREILKKQDSIFATRPLTMGSEYCSHVKEDEKSGGNSRDKSEELQIDAQKGTEEADNLVRYINNFCIKNGGFAVFDLRLVMRQYCGNVARKMMFGVRHFGKGSEDESGPGMEEIEHVESVFTTRAMAYGKKTEPQDFLDMFISAKDTDGKPTLSDKEIKAQITELMLATVDNPSNAVEWAMAEMINEASIMQKAVEEINMIVGKYRMVLESDLPNLNYGKACVKEAFRLHPVAPFNIPHVSTADVVVDGYFIPKGSHMLISRLGIGRNPNVWDTPLKFDPERHLYNNKNVELNEPDLNLISFSTGRRGCMGSNIGLAMTHMLLARLI…
	BniB08g061180	ATGGAAAGAAAGCCTTTTGAGGTTGAGACAACGAAGACGGATGAGGATAAGAAACCCTACTCCGCCGTCGATGGCGGCGGTTCTGATTCGGTCGATTCGTTTGATGAAGATCAGGAAAAGCTCGTGTATAGAGGATGGAAAGTCATGCCTTTTATCATTGGTAACGCTTTTTTTTTTTCTCTCTCTCTCTCTCTCTCTGTTCAGACACTCTGTTTTTATATTACTGTGTGTCTGCTTTCTCAACACGGTCCATAAACTAAATAAAAATGTGAACACAAACTAGAACATGTTGTCCGTGATTTCTCAAAAGTACTTTTCTTTCTTTTCTTCTCTTTAAATTGACTGTGTTGAAATTCTTGAAATTGAGTTTATTGTTTTGGGATTCCGAAATGAATGAAA…	ATGGAAAGAAAGCCTTTTGAGGTTGAGACAACGAAGACGGATGAGGATAAGAAACCCTACTCCGCCGTCGATGGCGGCGGTTCTGATTCGGTCGATTCGTTTGATGAAGATCAGGAAAAGCTCGTGTATAGAGGATGGAAAGTCATGCCTTTTATCATTGGTAATGAAACATTTGAGAAGATTGGGATCATTGGGACATTATCAAACCTTCTTGTCTACCTAACTCAAGTATTCAACCTCAAGAAATACACAGCTGCAACCATCATCAATGCCTTCAGTGGCACCATCAACTTCGGCACTTTCCTCGCTGCTTTCCTCTGCGACACTTACTTTGGTCGCTACAAGACTCTCAGTGTTGCTGTCATCGCTTGTTTTCTGGGATCGCTTGCGATACTACTG…	MERKPFEVETTKTDEDKKPYSAVDGGGSDSVDSFDEDQEKLVYRGWKVMPFIIGNETFEKIGIIGTLSNLLVYLTQVFNLKKYTAATIINAFSGTINFGTFLAAFLCDTYFGRYKTLSVAVIACFLGSLAILLTAAVPGLHPTPCGTKSSCEGPDVGQIAFLLLGLALLVVGAGGIRPCNLAFGADQFNPKSESGKKGINSFFNWYFFTFTFAQIISLTLVVYIQSNVSWTIGLSIPVGLMFLACVIYFAGHKLYVKVKASGSPLAGIARVIAAAISKRGLKPVKQPWVDLYNHIPRNYANLTLKYTDQFRFLDKGAIMTPEDKLNSDGTASDPWKLCTMQQVEEVKCIIRVIPIWFACAIYYLAISIQMTYPVFQAQQSDRRLGSGGFKIPAATYVVF…
	BniB08g063340	ATGGAGAGAGCAACCATTTCCCCGAGCCTACTAAGTCAGAACTACCTACTTTTTCCTTCACGCGCCTTCGCCACGCGCCTCCGCTCGTTCTCCGCTACTCGGAACTTATCGCCTTCATCTCCCTCCTCCTCCATCAATGTCTCTTCCTTTTTCCACTGTTTATATTAATTTCTCAAATTGTTATCATCATCATCTTACCCATTTCTCCGATTGTATTTAACAGCTTCAGCATTCTTCGTCTTCCTCTGTATCTTCCAATGGCGGAACCTCCCTTGCTCGTTGCAACGCCGTCCTCTCCAATTCGTCTTCCAGGTTTTGCTGGAATCACAATCATCTGGGGGGTACCCTTATTTGTTTTTTTGCTAATTGATGATGAGATTGGGGTTTTATTACATGTTG…	ATGGAGAGAGCAACCATTTCCCCGAGCCTACTAAGTCAGAACTACCTACTTTTTCCTTCACGCGCCTTCGCCACGCGCCTCCGCTCGTTCTCCGCTACTCGGAACTTATCGCCTTCATCTCCCTCCTCCTCCATCAATCTTCAGCATTCTTCGTCTTCCTCTGTATCTTCCAATGGCGGAACCTCCCTTGCTCGTTGCAACGCCGTCCTCTCCAATTCGTCTTCCAGTACGGATGTGTCTGAGGTAGCAGACATAGATTGGGACAACATCGGGTTCGGTCTTAAGCCCACTGATTACATGTACGTCATGAAATGTAACCTTGATGGTGAGTTCTCTAATGGTGAATTGCAACGTTTTGGGAACATTGAAGTCAGCCCTTCTGCTGGTGTCCTCAACTAT…	MERATISPSLLSQNYLLFPSRAFATRLRSFSATRNLSPSSPSSSINLQHSSSSSVSSNGGTSLARCNAVLSNSSSSTDVSEVADIDWDNIGFGLKPTDYMYVMKCNLDGEFSNGELQRFGNIEVSPSAGVLNYGQGLFEGMKAYRKQDGKNILLFRPEENATRMRNGAERMCMPAPTVDQFVQAVKATVLANKRWVPPPGKGSLYIRPLLMGTGAVLGLAPAPEYTFLVYVSPVGNYFKEGVSPINLIVESEFHRATPGGTGGVKTIGNYAAVLKAQSIAKSKGYSDVLYLDCVYKRYLEEVSSCNIFIVKDNVISTPEIKGTILPGITRKSIIDVARTQGFKVEERNVTVDELLEADEVFCTGTAVVVSPVGSITHKGKRVSYGEGSFGPVSKQVYTV…
	BniS02554g140	ATGGCCAATCGTATCTCGTTTCATGACGTAGCTAAACATAAGTGCAAGAACGATTGTTGGATTCTCATCCATGGAAAGGTCACTTTTTCATGAATCCATTTTTTCTTCTTAGTCATACTACGATCTAAAACAAGTGTACCCACAGGTCTATGACTCGTAGATGAACATCCTGGCGGTGACAATGTTCTCCTCGCCGTCACCAGTACGTCAAATAATCATAGGTTAAACCCGGTTTGTTTTTTTCGATTTCTTTTGGTTTACGTAATTGTGTGAATTTATCGACAACTTACTAAAAAAGGAAAGGACGCGTCGACTGATTTCGATGATGTTAATCATAGCGATGAAGCGAAAGAAACGATGGAGAAAATTTTTTATCGGTGACGTTGACCAGTCAACAGT…	ATGGCCAATCGTATCTCGTTTCATGACGTAGCTAAACATAAGTGCAAGAACGATTGTTGGATTCTCATCCATGGAAAGGAAAGGACGCGTCGACTGATTTCGATGATGTTAATCATAGCGATGAAGCGAAAGAAACGATGGAGAAAATTTTTTATCGGTGACGTTGACCAGTCAACAGTTCCGGTGACGGCAAAGTATATTCCGCCGTGGGAGAAAGAATCTACAGTCGAAACCACCAAAGAAGAGACTGGAAACAAGTTGCTTGTATACTTGATTCCTCTCTTGATTCTCGGCGTTGCGTTCTTTCTCAGATTCTACAACAACAACAACAAGCAGACGAGTTAA	MANRISFHDVAKHKCKNDCWILIHGKERTRRLISMMLIIAMKRKKRWRKFFIGDVDQSTVPVTAKYIPPWEKESTVETTKEETGNKLLVYLIPLLILGVAFFLRFYNNNNKQTS-
	BniS02554g500	ATGGAGACTAATTCTTCTGGAGAGGATCTGATTGTTAAGGTAACTTTAATTTAAATTTAGTTGGTGAAAGACCAAAAATGGAAACTTTAGTGAACTTTTGTATGAGTTTTTTTTTTTGTTTTGTCGTGTTGTTGTAATGAAATGAAATATTTAGACGAGGAAGCCATATACGATAACAAAGCAACGTGAACGATGGACTGAGGAAGAACATAATAGGTTCCTTGATGCCTTGAGGCTTTATGGTAGAGCTTGGCAGAAGATCGAAGGTTCCCTTTTTTTTTTGTTTCTTCTTTTTTTGATGTTCTTGTCTTGTAGTAGAGGTTCTTTTTTGCTTTGGTTCTTCAAACTGATTTGCTTTTTTGTTCTTCTTCTTTTGGACAGAACATGTGGCAACCAAAA…	ATGGAGACTAATTCTTCTGGAGAGGATCTGATTGTTAAGACGAGGAAGCCATATACGATAACAAAGCAACGTGAACGATGGACTGAGGAAGAACATAATAGGTTCCTTGATGCCTTGAGGCTTTATGGTAGAGCTTGGCAGAAGATCGAAGAACATGTGGCAACCAAAACTGCCGTGCAGATTAGAAGCCATGCTCAGAAATTTTTCTCCAAGGTAGAGAAAGAGGCTGAAGCTAAAGGTGTACCAGTGGCTCAAGCGCTAGACATAGCTATCCCTCCTCCACGCCCTAAACGTAAACCAAACAATCCTTATCCTAGAAAGACCGGAACTGGATCTCTCCCCATCTCTAAAACGGGTCTCAGTGATGGAAAACAGTCCCTTGGATCAGATAAAGTCTTG…	METNSSGEDLIVKTRKPYTITKQRERWTEEEHNRFLDALRLYGRAWQKIEEHVATKTAVQIRSHAQKFFSKVEKEAEAKGVPVAQALDIAIPPPRPKRKPNNPYPRKTGTGSLPISKTGLSDGKQSLGSDKVLLPEMTNEDLQEDNCSDCLTHQHFSAASSIKTSNASTFREFLPSREQGNNKESNSANYSENIEAGGSQTYPTHIPVLLPLGTRSLSHEPDENSHHPHTVAGDHQSFPDHIMSSLLQTPALYTAASFASTFWPPDTSVGPQGNNLTPNLAAMAAATVAAASAWWAANGLLPLCAPFSSGGLTSHPPTITYGPSSGEVDVTKTTDQEHSEASKARSSLDSEETKNGSKPDCHEHHPCAATETDAKGSDGARDRKQVDRSSCGSNTPSSS…

## Sheet: Table S4
	Table S4 Expression data of BniGSL genes in different organs of Brassica nigra (FPKM).
	Gene Name1	Gene Name2	Gene ID	Root1	Root2	Root3	Stem1	Stem2	Stem3	Leaf1	Leaf2	Leaf3	Root	Stem	Leaf	log2FC (Root_vs_Stem)	FDR (Root_vs_Stem)	Regulated (Root_vs_Stem)	log2FC (Root_vs_Leaf)	FDR (Root_vs_Leaf)	Regulated (Root_vs_Leaf)	log2FC (Stem_vs_Leaf)	FDR (Stem_vs_Leaf)	Regulated (Stem_vs_Leaf)
	Side-chain elongation
	BCAT4	BniBCAT4-1	BniB01g044210	4.19089	15.7118	12.8998	175.374	239.884	251.632	90.8597	325.678	439.418	10.9342	222.297	285.319	3.37974	1.25e-07	up	4.40442	3.04526e-08	up	0.949655	0.063624	-
		BniBCAT4-2	BniB07g030730	1.76268	9.59691	4.22882	93.3564	155.574	108.033	42.9165	138.957	176.907	5.19614	118.988	119.594	3.59995	9.61e-08	up	4.30331	5.32525e-08	up	0.605688	0.236775	-
	BCAT6	BniBCAT6	BniB04g060340	21.9283	20.359	15.1174	11.6365	14.2425	13.0281	0.621397	1.51271	0.536569	19.1349	12.969	0.890225	-1.3026	6.63e-07	down	-4.42696	4.8182e-19	down	-3.23244	3.63e-19	down
	MAM1	BniMAM1-1	BniB04g003060	1.05338	1.87675	0.414797	13.1551	28.6351	18.5735	14.6051	27.8427	30.8328	1.11498	20.1212	24.4269	3.4008	1.28e-09	up	4.40923	2.42779e-14	up	0.869342	0.027053	-
		BniMAM1-2	BniB02g076300	5.72377	19.4527	3.32728	292.648	584.058	424.175	213.077	503.908	573.028	9.50125	433.627	430.004	4.68901	7.89e-13	up	5.40745	1.5937e-14	up	0.5855	0.178249	-
		BniMAM1-3	BniB08g036280	0.502017	0.518792	0	0.06023	0.955845	0.623149	0	0.061984	0	0.34027	0.546408	0.0206613	-	-	-	-	-	-	-	-	-
		BniMAM1-4	BniB02g076310	28.8799	72.0071	36.3337	3.9013	11.1685	5.97589	0.231546	0	0	45.7402	7.01524	0.077182	-3.45276	3.84e-09	down	-8.93676	9.83739e-20	down	-4.29235	0.001118	down
		BniMAM1-5	BniB05g055400	10.2277	4.86323	2.7517	0	0	0	0	0	0	5.94753	0	0	-10.1387	1.74e-11	down	-9.83579	2.67877e-09	down	-	-	-
	IPMI SSU1	BniIPMI SSU1-1	BniB08g028010	77.8286	119.647	191.639	69.2018	66.9079	70.7882	101.586	135.406	96.5989	129.705	68.966	111.197	-1.80438	0.003177	down	-0.488466	0.479973	-	1.23737	4.53e-11	up
		BniIPMI SSU1-2	BniB06g001990	15.6343	26.4151	45.1419	4.50266	3.97236	5.434	3.38994	5.05555	4.74539	29.0638	4.63634	4.39696	-3.51131	5.58e-08	down	-2.94126	1.64433e-05	down	0.487197	0.15665	-
	IPMI SSU2	BniIPMI SSU2	BniB06g002000	40.9926	148.351	116.574	236.637	355.158	214.688	138.395	216.347	331.579	101.973	268.828	228.774	0.501225	0.489288	-	0.969646	0.201083	-	0.366265	0.384598	-
	IIL1	BniIIL1-1	BniB07g011950	81.8932	98.2847	39.5565	158.168	274.221	191.618	167.263	294.394	275.432	73.2448	208.002	245.696	0.795878	0.051851	-	1.74497	5.97646e-05	up	0.819442	0.009086	-
		BniIIL1-2	BniB07g011910	95.7423	113.377	43.4348	159.284	308.022	223.84	200.796	331.187	326.374	84.1846	230.382	286.119	0.746687	0.088407	-	1.77304	4.11448e-05	up	0.895296	0.004835	-
	IMD1	BniIMD1	BniB05g024330	28.2949	49.3701	17.6323	144.047	276.357	176.671	114.23	262.037	335.594	31.7658	199.025	237.287	1.89525	7.56e-05	up	2.86725	9.18299e-07	up	0.848605	0.052597	-
	BCAT3	BniBCAT3-1	BniB08g063340	24.0849	25.4175	10.7839	28.0853	41.0471	34.6422	64.8394	85.3455	84.0027	20.0955	34.5915	78.0625	0.089544	0.825944	-	1.96301	5.43313e-08	up	1.74319	4.4e-15	up
		BniBCAT3-2	BniB05g048020	21.505	18.8271	8.73071	19.0465	23.0253	20.0522	19.6927	26.0056	20.8024	16.3543	20.708	22.1669	-0.33557	0.313165	-	0.45481	0.199156	-	0.658869	0.000798	-
	Core structure formation
	CYP79F1	BniCYP79F1	BniB06g041700	28.5376	96.2298	34.1439	355.817	545.424	424.713	215.923	391.465	488.178	52.9704	441.985	365.189	2.24543	0.000119	up	2.6859	2.99775e-05	up	0.320831	0.409587	-
	CYP79A2	BniCYP79A2-1	BniB02g055340	0	0	0	0	0	0	0	0	0	0	0	0	-	-	-	-	-	-	-	-	-
		BniCYP79A2-2	BniB02g055360	0	0	0	0	0	0	0	0	0.04414	0	0	0.0147133	-	-	-	-	-	-	-	-	-
		BniCYP79A2-3	BniB02g055420	0	0	0	0	0	0	0	0	0.050631	0	0	0.016877	-	-	-	-	-	-	-	-	-
		BniCYP79A2-4	BniB05g029220	0	0	0	0	0	0	0	0	0	0	0	0	-	-	-	-	-	-	-	-	-
		BniCYP79A2-5	BniB08g051390	0	0	0	0	0	0	0	0	0	0	0	0	-	-	-	-	-	-	-	-	-
	CYP79B2	BniCYP79B2-1	BniB02g088940	11.6197	12.6413	4.23652	1.11349	1.94183	1.29696	1.1377	0.96346	3.48748	9.49918	1.45076	1.86288	-3.34752	2.93e-14	down	-2.20633	0.00120954	down	0.962061	0.108459	-
		BniCYP79B2-2	BniB05g000130	31.3258	45.0762	18.0391	5.97316	5.96249	5.39022	4.72505	5.78893	10.7224	31.4803	5.77529	7.07879	-3.13351	2.43e-17	down	-2.10819	8.10049e-05	down	0.876133	0.02718	-
		BniCYP79B2-3	BniB03g014770	9.50806	13.9569	3.81298	0.604046	0.514746	0.495063	0.534199	0.489047	1.44836	9.09264	0.537952	0.823868	-4.67369	9.9e-21	down	-3.31231	3.67087e-07	down	-	-	-
	CYP79B3	BniCYP79B3	BniB01g021760	7.07957	6.16082	6.2561	9.01206	6.97925	5.95901	2.15248	1.92462	5.5768	6.49883	7.31677	3.21797	-0.59764	0.162859	-	-1.05419	0.105959	-	-0.56912	0.275478	-
	CYP79C1	BniCYP79C1-1	BniB08g040770	0	0	0	0	0	0	0	0	0	0	0	0	-	-	-	-	-	-	-	-	-
		BniCYP79C1-2	BniB08g040860	0	0	0	0	0	0	0	0	0	0	0	0	-	-	-	-	-	-	-	-	-
		BniCYP79C1-3	BniB08g040830	0	0	0	0	0	0	0	0	0	0	0	0	-	-	-	-	-	-	-	-	-
		BniCYP79C1-4	BniB08g040890	0	0	0	0	0	0	0	0	0	0	0	0	-	-	-	-	-	-	-	-	-
	CYP79C2	BniCYP79C2-1	BniB04g007960	0	0	0	0	0	0	0	0	0	0	0	0	-	-	-	-	-	-	-	-	-
		BniCYP79C2-2	BniB01g003800	0	0	0	0.030271	0.473231	0.098354	0	0	0	0	0.200619	0	-	-	-	-	-	-	-	-	-
		BniCYP79C2-3	BniB06g009140	0	0	0	0	0	0	0	0	0	0	0	0	-	-	-	-	-	-	-	-	-
	CYP83A1	BniCYP83A1-1	BniB01g003820	4.73518	21.6176	6.18809	18.7315	98.0756	43.0018	4.13205	14.6001	22.8003	10.847	53.2696	13.8442	1.45536	0.083733	-	0.321647	0.73463	-	-1.17052	0.213888	-
		BniCYP83A1-2	BniB06g067060	18.2468	66.9098	17.1735	533.983	737.469	582.599	530.967	720.289	817.004	34.11	618.017	689.42	3.36907	2.69e-08	up	4.23681	8.39995e-12	up	0.737395	0.005236	-
	CYP83B1	BniCYP83B1	BniB07g013920	212.2	482.426	355.114	56.5729	47.348	39.9735	49.3273	53.9665	98.4505	349.914	47.9648	67.2481	-3.64874	9.17e-13	down	-2.46938	4.73481e-05	down	1.05874	0.003844	up
	CYTB5-C	BniCYTB5-C-1	BniB01g000830	404.901	445.342	605.715	285.528	356.369	286.944	128.876	187.786	268.68	485.319	309.613	195.114	-1.49857	0.002119	down	-1.46259	0.0149328	down	-0.06915	0.862857	-
		BniCYTB5-C-2	BniS02554g140	31.5943	17.2669	22.5574	21.4613	31.3294	16.7803	9.06541	20.6177	20.3637	23.8062	23.1903	16.6823	-0.79002	0.101867	-	-0.566288	0.345245	-	0.110061	0.827668	-
	GSTF9	BniGSTF9-1	BniB01g013320	789.679	1938.34	1837.72	855.885	1473.89	1019.52	466.926	1082.88	1149.38	1521.91	1116.43	899.727	-1.31734	0.032962	down	-0.931545	0.193775	-	0.283997	0.512297	-
		BniGSTF9-2	BniB08g019200	308.259	548.375	589.671	448.857	794.845	598.491	279.315	668.329	685.441	482.102	614.064	544.362	-0.52975	0.376964	-	-0.0106556	0.988716	-	0.419465	0.318539	-
	GSTF10	BniGSTF10	BniB08g019210	641.923	439.457	443.025	410.568	505.858	484.448	66.0791	52.3684	44.0472	508.135	466.958	54.1649	-0.87236	0.00301	-	-3.29559	3.34858e-22	down	-2.54502	2.3e-53	down
	GSTF11	BniGSTF11	BniB01g061730	8.19796	16.9914	14.5692	101.205	181.928	127.361	55.9979	84.3298	110.576	13.2529	136.832	83.6345	2.46906	3.97e-06	up	2.46548	3.53701e-05	up	-0.10591	0.796309	-
	GSTU13	BniGSTU13-1	BniB04g039630	1509.26	2951.08	2621.45	30.6372	26.1271	32.8887	40.4504	57.62	66.5624	2360.59	29.8843	54.8776	-7.06429	7.11e-48	down	-5.5171	5.77254e-24	down	1.44004	3.75e-07	up
		BniGSTU13-2	BniB03g031270	587.7	830.684	709.571	25.9571	54.012	29.9478	9.19308	16.1927	21.1774	709.318	36.639	15.5211	-5.0471	5.73e-28	down	-5.55425	7.49013e-26	down	-0.61709	0.152488	-
	GSTU20	BniGSTU20	BniB06g050340	376.523	312.078	296.901	1657.06	2729.27	2296.09	1286.58	2740.15	2480.8	328.501	2227.48	2169.18	1.97338	2.39e-09	up	2.62362	1.50889e-08	up	0.545292	0.124633	-
	GGP1	BniGGP1-1	BniB02g084810	837.952	608.634	528.777	82.9701	56.7702	44.7558	225.033	125.855	271.471	658.454	61.4987	207.453	-4.1124	2.11e-28	down	-1.68281	0.000253057	down	2.27976	1.08e-09	up
		BniGGP1-2	BniB05g007160	675.24	340.125	281.751	90.5753	103.478	76.6109	192.568	237.98	420.462	432.372	90.2215	283.67	-2.92056	5.81e-20	down	-0.553505	0.303193	-	2.21874	1.97e-10	up
		BniGGP1-3	BniB03g010950	418.047	295.838	316.669	12.7159	14.0152	12.3828	14.5064	13.4036	21.7099	343.518	13.0379	16.54	-5.45724	1.04e-73	down	-4.40427	9.68329e-25	down	0.91843	0.002798	-
		BniGGP1-4	BniB05g007170	4.77912	4.97173	4.18053	0.866243	1.39027	0.83478	1.70328	1.95917	3.49882	4.64379	1.03043	2.38709	-2.90148	6.28e-10	down	-1.00447	0.0827222	-	1.74999	0.000521	up
	GGP3	BniGGP3	BniB03g010940	27.2704	24.6681	20.8405	13.2988	11.1961	14.6942	11.0548	9.3023	10.6972	24.2597	13.063	10.3514	-1.6405	2.36e-07	down	-1.2979	0.000280879	down	0.223153	0.408108	-
	SUR1	BniSUR1-1	BniB03g070290	99.1951	202.348	81.6827	106.821	126.132	80.3617	69.268	111.532	192.418	127.742	104.438	124.406	-1.02711	0.038577	down	-0.0529101	0.941893	-	0.840414	0.047558	-
		BniSUR1-2	BniB02g015530	11.6435	25.3928	8.69557	24.4802	26.299	24.5778	16.812	25.5724	51.7814	15.2439	25.119	31.3886	-0.01442	0.981644	-	1.03071	0.130942	-	0.9143	0.037509	-
	UGT74B1	BniUGT74B1	BniB04g039340	25.0992	49.3481	30.7045	45.1787	64.1365	36.8856	39.2721	69.4517	89.882	35.0506	48.7336	66.2019	-0.32622	0.550223	-	0.814546	0.177105	-	1.02215	0.006995	up
	UGT74C1	BniUGT74C1-1	BniB06g020830	4.091	12.6612	4.40472	83.6265	130.388	71.3924	80.9651	131.893	207.455	7.05229	95.1358	140.104	2.93186	4.22e-07	up	4.19939	5.22325e-11	up	1.14496	0.004902	up
		BniUGT74C1-2	BniB01g012360	0.167687	0.185551	0.441104	6.24334	8.81377	6.66216	11.9345	16.9183	17.4336	0.264781	7.23975	15.4288	3.77611	4.95e-09	up	5.52049	1.58198e-17	up	1.65594	3.64e-10	up
	SOT16	BniSOT16-1	BniB03g052560	99.3744	259.472	224.667	23.2992	29.143	19.8249	9.7541	13.1141	21.2046	194.504	24.0891	14.6909	-3.82449	1.5e-11	down	-3.82561	3.41698e-09	down	-0.11372	0.795589	-
		BniSOT16-2	BniB05g070980	272.51	772.297	511.111	39.3794	36.4863	24.91	25.3756	42.4891	60.9418	518.639	33.5919	42.9355	-4.70595	2.57e-17	down	-3.6599	9.10255e-09	down	0.924932	0.020713	-
	SOT17	BniSOT17	BniB04g033130	43.4016	126.683	77.132	33.1714	40.117	26.5227	20.9572	44.5519	70.8231	82.4057	33.2704	45.444	-2.10628	0.000217	down	-0.947838	0.201548	-	1.03333	0.022454	up
	SOT18	BniSOT18-1	BniB03g052540	3.49563	13.0202	5.47665	56.6699	88.1023	45.9702	41.6617	70.069	95.577	7.33083	63.5808	69.1025	2.26664	0.00033	up	3.09578	2.8324e-06	up	0.708724	0.07868	-
		BniSOT18-2	BniB04g019280	0.228771	0.308538	0.131301	2.67358	3.82881	2.68776	3.48356	4.32488	6.58982	0.22287	3.06338	4.79942	2.81926	7.7e-07	up	4.17144	3.75077e-12	up	1.22078	0.001328	up
		BniSOT18-3/8	BniB03g038560-1/2	0.586241	0.616719	0.329545	0	0.088845	0.055516	0.240929	0.32134	1.30611	0.510835	0.0481203	0.622792	-	-	-	0.307885	0.748275	-	-	-	-
		BniSOT18-4	BniB03g052550	0.00947	0.163617	0	0.840572	1.27319	0.317471	0.317101	0.942386	1.56465	0.0576957	0.81041	0.94138	-	-	-	-	-	-	-	-	-
		BniSOT18-5	BniB06g047660	0.876884	1.0072	0.305656	0.03119	0.059848	0.060706	0.233289	0.793914	2.03823	0.729913	0.0505813	1.02181	-	-	-	0.549875	0.593099	-	-	-	-
		BniSOT18-6	BniB06g047670	9.03256	7.56961	5.32323	1.19611	1.02611	0.874772	0.637335	0.456421	0.239791	7.30847	1.03233	0.444516	-3.50151	7.03e-24	down	-4.00295	3.63083e-18	down	-0.62639	0.286028	-
		BniSOT18-7	BniB06g047650	0.874407	0.879288	0.606378	0.142239	0.030351	0.106541	0	0.028477	0	0.786691	0.0930437	0.00949233	-	-	-	-	-	-	-	-	-
		BniSOT18-9	BniB04g020570	0.158882	0.028242	0.561159	0.060552	0.049424	0.045314	0	0	0.112425	0.249428	0.0517633	0.037475	-	-	-	-	-	-	-	-	-
		BniSOT18-10	BniB02g035710	1.58798	1.57337	0.781026	0.342029	0.139194	0.0317	0	0.059663	0.032185	1.31412	0.170974	0.030616	-	-	-	-	-	-	-	-	-
		BniSOT18-11	BniB04g020560	82.2086	62.4701	62.494	2.42145	2.61516	2.02434	1.20382	1.50208	0.625369	69.0576	2.35365	1.11042	-5.59659	4.08e-68	down	-6.00421	3.37192e-44	down	-0.53421	0.213414	-
		BniSOT18-12	BniB06g047680	1.51827	1.05629	0.331432	0.100431	0	0.06416	0	0	0	0.968663	0.0548637	0	-	-	-	-	-	-	-	-	-
		BniSOT18-13	BniB03g038630	4.87386	6.77677	2.73877	0.600768	0.422142	0.087348	0	0.057938	0.05404	4.79647	0.370086	0.037326	-4.22062	2.67e-10	down	-6.52194	1.07869e-15	down	-	-	-
	Secondary modification
	FMOGS-OX1	BniFMOGS-OX1	BniB04g021440	1.60327	4.25906	1.39109	91.2254	145.811	99.6441	164.105	201.934	246.933	2.41781	112.227	204.324	4.70806	2.3e-19	up	6.27819	1.51055e-31	up	1.44161	1.35e-07	up
	FMOGS-OX5	BniFMOGS-OX5-1	BniB03g004970	1.17858	0.403071	0.920785	5.6844	6.85266	7.58489	4.33328	3.74063	3.13905	0.834145	6.70731	3.73766	2.17677	5.25e-05	-	2.00562	0.000459802	up	-0.28205	0.235388	-
		BniFMOGS-OX5-2	BniB02g006840	10.1165	18.8889	9.11485	21.8727	20.9635	26.008	22.9772	19.9234	24.358	12.7068	22.9481	22.4195	0.089747	0.863003	-	0.744828	0.120174	-	0.532408	0.016043	-
	CYP81F1	BniCYP81F1-1	BniB05g001500	3.29665	9.19261	3.30187	12.6607	10.2134	10.3448	10.8993	6.20361	6.75627	5.26371	11.073	7.95306	0.311782	0.621541	-	0.506998	0.422223	-	0.062874	0.854979	-
		BniCYP81F1-2	BniB03g041020	5.69085	9.28041	3.87665	0	0	0.028745	0	0	0	6.28263	0.00958167	0	-8.94174	8.97e-20	down	-10.3138	1.95155e-10	down	-	-	-
		BniCYP81F1-3	BniB05g001510	0.35949	0.154907	0.043481	10.3256	5.1774	8.16365	0.755219	0.037122	0.430547	0.185959	7.8889	0.407629	4.62303	1.25e-13	up	-	-	-	-3.54075	1.89e-08	down
	CYP81F2	BniCYP81F2-1	BniB02g036600	14.1922	20.1861	18.5125	0.044758	0	0.043556	0	0.081972	0	17.6302	0.029438	0.027324	-9.39853	1.22e-33	down	-8.84962	4.39562e-24	down	-	-	-
		BniCYP81F2-2	BniB05g036790	7.29301	22.5154	4.87073	0	0	0	0	0.036324	0.03051	11.5597	0	0.022278	-11.2382	2e-14	down	-8.36267	5.2733e-19	down	-	-	-
		BniCYP81F2-3	BniB08g013930	9.8298	8.1921	17.1183	0.154809	0.127279	0.122142	0.101569	0	0.030734	11.7134	0.134743	0.044101	-7.07173	1.04e-26	down	-7.88392	3.923e-19	down	-	-	-
	CYP81F3	BniCYP81F3-1	BniB05g001540	1.19073	2.42536	0.541726	9.67767	3.33818	2.80116	13.0367	6.55024	8.27795	1.38594	5.27234	9.28829	1.23031	0.123889	-	2.69976	3.29346e-06	up	1.2838	0.013091	up
		BniCYP81F3-2	BniB03g014280	0.463524	0.640552	0	1.30962	0.622113	0.665238	2.5146	1.2394	1.78486	0.368025	0.865658	1.84628	0.620978	0.633128	-	2.3369	0.0198016	up	1.57498	0.000927	up
	CYP81F4	BniCYP81F4-1	BniB05g001530	84.1636	150.365	32.7919	1.30396	7.21409	2.24182	0	0	0	89.1068	3.58662	0	-5.18995	5.12e-13	down	-13.5972	9.48679e-21	down	-7.60455	6.94e-12	down
		BniCYP81F4-2	BniB03g014290	7.11689	8.19159	1.41771	0.066984	0.126146	0.118335	0	0	0	5.5754	0.103822	0	-5.98926	7.17e-18	down	-9.98902	1.67409e-09	down	-	-	-
	AOP1	BniAOP1-1	BniB08g045800	16.499	14.3921	5.52333	3.09494	1.89537	2.08485	0.835232	0.255636	0.151976	12.1381	2.35839	0.414281	-2.96537	2.21e-11	down	-4.74243	8.60426e-14	down	-1.89139	0.002348	down
		BniAOP1-2	BniB08g039120	0.478549	0.471822	0	0.550775	0.924944	0.524061	0.713237	0.260158	0.488541	0.31679	0.666593	0.487312	-	-	-	-	-	-	-	-	-
	AOP2	BniAOP2-1	BniB05g055540	5.16893	2.87207	2.30841	472.71	1241.26	848.221	438.045	786.627	850.634	3.4498	854.064	691.769	7.16858	1.62e-62	up	7.5967	1.16432e-68	up	0.298241	0.493246	-
		BniAOP2-2	BniB08g045740	28.9256	27.3907	9.46001	432.01	978.105	709.227	281.609	497.107	522.011	21.9254	706.447	433.576	4.29831	3.49e-22	up	4.33118	2.11447e-21	up	-0.10084	0.813844	-
	IGMT1	BniIGMT1-1	BniB04g035790	29.8565	42.724	37.1897	0.40508	0.375555	0.572598	1.13576	1.17661	0.860037	36.59	0.451078	1.05747	-7.07878	3.45e-59	down	-5.22014	1.23685e-32	down	1.75689	1.54e-09	up
		BniIGMT1-2	BniB03g008950	6.60804	10.5874	5.49365	0.375858	0.317107	0.448592	3.18678	3.567	1.73825	7.56303	0.380519	2.83068	-4.96275	1.93e-24	down	-1.4912	0.00225329	down	3.32259	1.48e-15	up
	IGMT2	BniIGMT2	BniB03g008960	23.1288	52.6077	24.0504	0.311466	0	0.453214	1.12065	1.24737	0.993631	33.2623	0.254893	1.12055	-7.42406	6.11e-17	down	-4.91155	4.0927e-23	down	2.45809	0.002089	up
	IGMT5	BniIGMT5	BniB03g055850	184.74	169.138	44.8808	13.2105	14.987	9.18883	2.14084	6.5886	10.3383	132.92	12.4621	6.35592	-3.98782	4.16e-17	down	-4.171	6.38642e-10	down	-0.35008	0.557449	-
	Co-substrate pathways
	TSB1	BniTSB1-1	BniB02g033500	74.1181	81.6807	57.1386	43.5868	40.4236	42.5613	36.2897	52.1895	48.8286	70.9791	42.1906	45.7693	-1.49825	1.82e-07	down	-0.695073	0.0771209	-	0.67991	0.004377	-
		BniTSB1-2	BniB05g034690	8.0674	11.2574	0	7.73105	6.74891	7.96017	5.90599	6.83181	6.33199	6.44158	7.48004	6.3566	-0.31159	0.832835	-	0.140012	0.923005	-	0.32519	0.223547	-
	ASA1	BniASA1-1	BniB08g002350	46.54	54.5006	18.335	14.4796	10.4857	9.25584	10.4774	15.8494	21.1132	39.7919	11.4071	15.8133	-2.44102	1.43e-08	down	-1.2652	0.0123975	down	1.03059	0.005316	up
		BniASA1-2	BniB02g054940	21.3162	28.1209	10.0026	1.23556	2.03846	1.68088	3.84748	9.23311	5.41554	19.8132	1.65163	6.16538	-4.24555	4.21e-25	down	-1.66245	0.00109062	down	2.43276	2.15e-11	up
	APK1	BniAPK1-1	BniB06g037540	111.601	105.673	67.0717	169.536	206.817	126.133	123.648	130.768	226.726	94.7819	167.495	160.381	0.095756	0.801011	-	0.745969	0.10918	-	0.523884	0.1579	-
		BniAPK1-2	BniB02g011750	20.6927	32.4266	14.3693	70.3976	117.75	70.359	73.8643	86.192	134.613	22.4962	86.1689	98.223	1.1837	0.007992	up	2.08985	1.83073e-05	up	0.779985	0.027426	-
	APK2	BniAPK2-1	BniB02g088950	63.7608	149.92	57.7637	106.614	132.25	65.865	42.141	71.2523	125.327	90.4814	101.576	79.5733	-0.5794	0.32668	-	-0.201813	0.784372	-	0.247903	0.631058	-
		BniAPK2-2	BniB05g000140	32.1119	82.2293	27.1829	36.6472	52.8563	28.0481	20.4444	37.4631	52.6714	47.1747	39.1839	36.8596	-1.00027	0.090979	-	-0.365734	0.603182	-	0.503696	0.255069	-
		BniAPK2-3	BniB03g014780	4.25428	10.4694	7.5243	3.28228	9.75415	2.77453	3.26543	9.14976	19.5198	7.41599	5.27032	10.645	-1.31709	0.083041	-	0.404641	0.654972	-	1.57829	0.017806	up
	GSH1	BniGSH1-1	BniB05g014010	145.303	147.57	89.2873	104.975	127.679	124.136	91.1718	110.38	106.712	127.387	118.93	102.755	-0.82604	0.001079	-	-0.342325	0.308489	-	0.359753	0.063811	-
		BniGSH1-2/3	BniB02g080290-2/1	29.5335	18.5535	8.45116	16.2044	18.2927	16.7676	16.2719	15.9275	16.8438	18.8461	17.0882	16.3477	-0.76756	0.044481	-	-0.132354	0.759102	-	0.501633	0.003314	-
		BniGSH1-4	BniB03g021390	0.353073	0.141284	0	0.112478	1.25	0.289221	1.03208	1.64348	1.60236	0.164786	0.550567	1.42598	-	-	-	3.14556	0.000328832	up	1.8424	0.012284	up
	GSH2	BniGSH2-1	BniB07g038410	56.5891	31.0726	11.2136	19.7564	32.5868	24.3283	37.6207	51.8763	53.3484	32.9584	25.5571	47.6151	-0.95473	0.063935	-	0.648621	0.214608	-	1.47106	1.73e-08	up
		BniGSH2-2	BniB02g079220	57.9674	43.0116	15.3839	28.66	33.087	31.652	43.2393	34.866	52.817	38.7876	31.133	43.6407	-0.93747	0.023884	-	0.259036	0.605504	-	1.06026	1.57e-05	up
	APS1	BniAPS1-1	BniB03g024880	70.8389	201.121	267.2	103.286	171.775	88.7429	478.023	354.224	541.166	179.72	121.268	457.804	-1.48443	0.044236	down	1.0539	0.16151	-	2.47356	2.64e-16	up
		BniAPS1-2	BniB01g039550	213.39	229.643	352.907	36.8273	61.8595	32.0619	240.742	195.692	248.674	265.313	43.5829	228.369	-3.44456	1.87e-10	down	-0.422764	0.487732	-	2.94001	1.87e-26	up
	APS3	BniAPS3	BniB05g021440	119.582	289.608	122.895	56.5393	59.6713	38.9869	30.9909	37.9132	57.5875	177.362	51.7325	42.1639	-2.51049	7.53e-07	down	-2.09553	0.000215111	down	0.287483	0.450963	-
	APR1	BniAPR1-1	BniB08g047710	22.0538	19.0636	8.93395	20.7844	27.4573	20.0657	31.7313	10.2718	13.6169	16.6838	22.7691	18.54	-0.22904	0.528801	-	0.150499	0.806654	-	0.241945	0.590896	-
		BniAPR1-2	BniB05g056120	0.422252	0.136912	0	0.209372	0	0.422731	0.115065	0.154796	0	0.186388	0.210701	0.0899537	-	-	-	-	-	-	-	-	-
	APR3	BniAPR3-1	BniB02g079650	209.378	140.513	76.6023	125.937	159.771	129.909	109.436	61.8185	105.388	142.164	138.539	92.2143	-0.6968	0.026466	-	-0.57562	0.188558	-	-0.01161	0.97273	-
		BniAPR3-2	BniB05g015070	108.175	108.657	51.1473	85.888	93.1153	67.3	72.3979	20.3785	62.9215	89.3267	82.1011	51.8993	-0.80862	0.01547	-	-0.758895	0.210764	-	-0.08859	0.865871	-
	OASA1	BniOASA1-1	BniB07g020470	174.839	206.285	155.542	244.61	544.46	370.852	173.286	355.282	318.28	178.889	386.641	282.283	0.317789	0.502664	-	0.569866	0.25941	-	0.140354	0.744673	-
		BniOASA1-2	BniB05g021220	132.367	126.907	103.974	82.2849	90.0698	90.761	90.7749	100.482	122.68	121.083	87.7052	104.646	-1.22518	7.86e-06	down	-0.277527	0.506549	-	0.82843	0.000232	-
	CHY1	BniCHY1-1	BniB04g000010	11.7399	6.60238	2.61294	34.2583	36.5211	43.0007	49.1331	47.9555	40.7895	6.98506	37.9267	45.9594	1.81338	3.76e-05	up	2.78302	2.48946e-11	up	0.832975	7.41e-08	-
		BniCHY1-2	BniB01g014580	0	0	0	0.404828	0.554307	1.01082	0.137171	0.245007	0	0	0.65665	0.127393	-	-	-	-	-	-	-	-	-
		BniCHY1-3	BniB01g014490	1.79567	1.37307	0.918336	2.3186	7.56167	9.50312	9.52178	15.7316	6.6002	1.36236	6.46113	10.6178	1.47721	0.025456	up	2.88135	1.07271e-09	up	1.24924	0.011301	up
		BniCHY1-4	BniB06g018370	0	0	0	0.070269	0.160058	0.024382	0	0	0	0	0.084903	0	-	-	-	-	-	-	-	-	-
		BniCHY1-5	BniB06g018590	0	0	0	0	0.109065	0	0	0	0	0	0.036355	0	-	-	-	-	-	-	-	-	-
	AAO4	BniAAO4	BniB06g046290	0.987321	0.253435	0.075038	0.693026	1.17669	0.586397	0.793266	0.831343	0.640145	0.438598	0.818703	0.754918	0.368481	0.689015	-	0.947833	0.234017	-	0.43706	0.244601	-
	BZO1	BniBZO1	BniB03g043330	0	0.151939	0	0.077888	0.397872	0.331791	0.110309	0	0.069706	0.0506463	0.269184	0.060005	-	-	-	-	-	-	-	-	-
	SCPL17	BniSCPL17	BniB07g056480	1.35363	0.553331	0.285195	1.36064	2.39407	2.00646	1.10491	2.38812	1.44712	0.73072	1.92039	1.64672	0.768766	0.240694	-	1.24482	0.0597463	-	0.340813	0.457049	-
	Activator
	MYB28	BniMYB28-1	BniB02g075850	0	0	0	8.99978	16.0226	10.1054	10.9042	13.265	19.3022	0	11.7092	14.4905	9.72682	1.88e-10	up	10.8417	8.32949e-12	up	0.89673	0.011424	-
		BniMYB28-2	BniB07g041200	0.088524	0.10045	0	22.057	41.8329	38.1017	28.3206	39.1401	37.7368	0.0629913	33.9972	35.0659	7.92078	3e-31	up	8.7054	3.12565e-38	up	0.626503	0.034356	-
		BniMYB28-3	BniB04g002670	0	0.142468	0	45.5212	64.4189	65.0433	45.8235	45.1278	37.2985	0.0474893	58.3278	42.7499	9.09039	4.95e-35	up	9.37823	2.1179e-36	up	0.115017	0.576826	-
	MYB29	BniMYB29-1	BniB08g003370	15.253	9.19459	2.63406	14.4073	44.9203	25.1599	24.1558	40.1833	49.5867	9.02723	28.1625	37.9753	1.01624	0.123789	-	2.18716	0.000141434	up	1.0249	0.019598	up
		BniMYB29-2	BniB02g053290	0.223311	0.157452	0	1.79914	2.12438	0.984904	0	0.590327	1.12814	0.126921	1.63614	0.572824	2.90424	0.001376	up	-	-	-	-0.68076	0.640056	-
	MYB34	BniMYB34-1	BniB02g076220	3.23971	4.41215	0	0	0	0.215886	0	0	0	2.55062	0.071962	0	-	-	-	-	-	-	-	-	-
		BniMYB34-2	BniB04g003010	0.238644	0.632109	0	0.064921	0	0	0	0	0	0.290251	0.0216403	0	-	-	-	-	-	-	-	-	-
		BniMYB34-3	BniB07g040970	5.55288	2.78319	0.773923	0	0.16472	0.081533	0.185698	0.158572	0.718588	3.03666	0.0820843	0.354286	-	-	-	-	-	-	-	-	-
	MYB51	BniMYB51-1	BniB03g028100	2.84144	0.878088	0.450447	1.12839	0.911642	2.27564	0.7519	0.665397	0.453073	1.38999	1.43856	0.623457	-0.49442	0.561772	-	-	-	-	-0.62899	0.282991	-
		BniMYB51-2	BniB03g007660	3.74346	1.49267	0.992603	3.75798	3.93239	4.91821	7.41669	4.35562	4.55705	2.07625	4.20286	5.44312	0.384865	0.492352	-	1.43174	0.00651696	up	0.913402	0.002572	-
		BniMYB51-3	BniB04g033080	1.15798	0.937315	0	0.332557	0.432311	0.320558	2.51294	0.917629	0.709287	0.698432	0.361809	1.37995	-	-	-	1.06951	0.37786	-	-	-	-
	MYB118	BniMYB118-1	BniB04g007120	0	0	0	0	0	0	0	0	0	0	0	0	-	-	-	-	-	-	-	-	-
		BniMYB118-2	BniB02g067910	0	0	0	0	0	0	0	0	0	0	0	0	-	-	-	-	-	-	-	-	-
	MYB122	BniMYB122-1	BniB03g052520	7.71894	3.22184	1.11412	0	0	0.063778	0	0	0	4.0183	0.0212593	0	-7.52085	1.43e-11	down	-9.02564	1.81621e-07	down	-	-	-
		BniMYB122-2	BniB05g070970	5.05124	2.81792	1.45589	0	0	0	0	0	0	3.10835	0	0	-9.29485	2.89e-09	down	-8.99497	1.58498e-07	down	-	-	-
	MYC2	BniMYC2-1	BniB04g049150	26.4026	50.5785	29.3595	33.3775	19.8491	22.9217	12.1851	15.5786	27.2198	35.4469	25.3827	18.3278	-1.24222	0.014455	down	-1.00767	0.0906759	-	0.109257	0.821783	-
		BniMYC2-2	BniB03g035750	48.2989	98.0329	30.2969	73.8992	38.3929	36.4108	24.8925	32.8583	71.4158	58.8762	49.5676	43.0555	-0.93122	0.123297	-	-0.416832	0.556089	-	0.371743	0.493067	-
		BniMYC2-3	BniB03g016310	19.9056	45.8133	12.2201	22.1929	13.0652	10.9174	7.23974	10.133	25.867	25.9797	15.3918	14.4133	-1.42657	0.020702	down	-0.789756	0.299332	-	0.487866	0.398006	-
	MYC3	BniMYC3-1	BniB02g063410	22.4793	19.0254	9.88042	46.5343	31.2229	40.7753	50.8278	40.7101	62.824	17.1284	39.5108	51.454	0.528439	0.14827	-	1.60305	1.68155e-05	up	0.938211	0.001738	-
		BniMYC3-2	BniB04g015560	27.9883	23.1315	13.0492	28.5945	21.8596	27.5333	15.8819	18.0572	21.4784	21.3897	25.9958	18.4725	-0.40227	0.212303	-	-0.19749	0.605341	-	0.074693	0.812346	-
	MYC4	BniMYC4	BniB05g018490	0.368631	0.372452	0	9.55406	11.9056	10.765	4.06873	3.99897	3.13196	0.247028	10.7415	3.73322	4.69083	7.38e-10	up	3.91571	6.51195e-07	up	-0.96221	9.32e-08	-
	IQD1	BniIQD1-1	BniB07g058100	0.304196	0.158553	0	0	0	0	0	0	0.037098	0.15425	0	0.012366	-	-	-	-	-	-	-	-	-
		BniIQD1-2	BniB03g023450	0.323099	0.45504	0	0	0	0	0	0	0	0.25938	0	0	-	-	-	-	-	-	-	-	-
	SLIM1	BniSLIM1-1	BniB03g052120	20.9438	8.72099	3.49264	9.01254	9.54118	7.51326	9.71402	9.28983	10.2495	11.0525	8.68899	9.75111	-0.89927	0.112669	-	-0.0378874	0.952687	-	0.726071	0.000927	-
		BniSLIM1-2	BniB03g038740	25.7978	9.11275	2.35965	3.77291	3.96737	4.55175	4.91189	5.29895	5.13226	12.4234	4.09734	5.11437	-2.07085	0.002417	down	-1.06472	0.122773	-	0.88019	2.59e-05	-
		BniSLIM1-3	BniB05g070840	1.43892	0.695655	0.396145	1.31835	1.28926	1.47209	1.64982	1.72306	1.53115	0.843574	1.3599	1.63468	0.059838	0.923288	-	1.00389	0.0451771	up	0.811998	0.005596	-
	OBP2	BniOBP2-1	BniB03g002340	10.4207	8.25963	4.6214	5.48879	4.66704	3.94464	10.6695	9.06245	9.51426	7.76725	4.70016	9.74875	-1.39741	5.59e-05	down	0.330445	0.325912	-	1.59341	1.16e-10	up
		BniOBP2-2	BniB06g043020	9.77562	6.03665	2.06798	8.61257	7.79415	6.26168	6.36756	5.22321	6.29883	5.96008	7.55614	5.9632	-0.25684	0.649043	-	0.101148	0.858286	-	0.216918	0.482842	-
		BniOBP2-3	BniB02g003700	0.952026	0.395986	0	1.9547	0.898558	0.932748	2.0315	1.34798	2.14097	0.449337	1.262	1.84015	0.942406	0.453802	-	2.15679	0.0321276	up	1.05903	0.0419	up
	CAMTA3	BniCAMTA3-1	BniB01g021790	50.5467	22.2697	4.48179	19.9792	20.483	18.6657	20.0877	23.0728	16.5575	25.7661	19.7093	19.906	-0.89021	0.208481	-	-0.190682	0.799879	-	0.562375	0.001288	-
		BniCAMTA3-2	BniB03g062790	0.501069	0.196925	0	0.293945	0.117517	0.083724	0.270382	0.210997	0	0.232665	0.165062	0.16046	-	-	-	-	-	-	-	-	-
		BniCAMTA3-3	BniB02g018410	0.94665	0.754834	0	1.32847	2.41756	3.46013	2.01273	1.58798	1.56582	0.567161	2.40205	1.72218	1.41501	0.218753	-	1.6728	0.105788	-	0.093237	0.850131	-
	CCA1	BniCCA1	BniS02554g500	2.43777	1.21982	0.330882	7.3252	10.0767	8.65706	44.4519	27.1555	30.5315	1.32949	8.68632	34.0463	2.0925	0.000246	up	4.73827	1.39642e-18	up	2.51353	3.07e-28	up
	Activator/Repressor
	HY5	BniHY5-1	BniB05g026170	66.5699	8.27383	37.8737	11.7342	13.1047	10.4388	16.3805	8.17199	7.59003	37.5725	11.7592	10.7142	-2.34646	0.001159	down	-1.84379	0.0167801	down	0.399772	0.28366	-
		BniHY5-2	BniB02g050820	55.5724	11.5184	35.6376	19.5391	24.6332	22.4945	25.353	13.882	11.9784	34.2428	22.2223	17.0711	-1.35462	0.033411	down	-1.0851	0.118946	-	0.162678	0.642995	-
		BniHY5-3	BniB06g056490	1.61292	0.417113	0	1.00457	6.66348	6.20266	2.65424	2.48418	1.85656	0.676677	4.62357	2.33166	-	-	-	-	-	-	-	-	-
	Repressor
	SD1	BniSD1-1	BniB02g069920	1.51805	0.237504	0.917201	41.3154	17.6388	41.0637	57.7142	6.29356	25.5256	0.890917	33.3393	29.8445	4.37749	2.34e-10	up	4.80555	3.02516e-08	up	0.333895	0.742544	-
		BniSD1-2	BniB07g037550	0.290206	0.173728	0	14.7572	21.9973	12.639	43.1549	0.783449	2.22336	0.154645	16.4645	15.3872	5.90228	5.97e-21	up	-	-	-	0.312389	0.829678	-
		BniSD1-3	BniB04g005760	4.13787	3.50576	0.834149	68.3993	42.3759	43.1347	87.3891	11.364	48.066	2.82593	51.3033	48.9397	3.5154	1.12e-11	up	4.08678	5.69948e-08	up	0.432732	0.634467	-
		BniSD1-4	BniB07g037520	0	0.707515	0	5.08509	9.38533	5.79269	11.0576	2.29374	4.85137	0.235838	6.75437	6.06755	3.71828	0.005777	up	4.28699	0.00128402	up	0.387934	0.504828	-
	SD2	BniSD2-1	BniB06g046090	69.6083	15.7546	12.3496	90.953	106.004	108.13	75.2842	40.0925	49.7835	32.5708	101.695	55.0534	1.06659	0.084864	-	0.174992	0.881386	-	-0.32553	0.240467	-
		BniSD2-2	BniB03g001070	36.7075	6.72151	5.73809	19.4798	34.8112	26.4259	39.7497	13.5529	14.4319	16.389	26.9056	22.5782	0.1614	0.837963	-	0.584335	0.465312	-	0.286965	0.540778	-
	FRS7	BniFRS7	BniB01g057400	0	0	0	0	0	0	0	0	0	0	0	0	-	-	-	-	-	-	-	-	-
	FRS12	BniFRS12	BniB08g009620	10.4205	7.89694	2.89509	10.8415	10.5362	9.02263	8.26242	8.92514	9.20158	7.07086	10.1335	8.79638	-0.10997	0.818016	-	0.384505	0.378474	-	0.356476	0.11404	-
	Mediator
	MED5	BniMED5-1	BniB01g038210	5.89102	2.95084	0.90831	7.43513	6.91936	6.32304	3.31455	3.64972	3.38535	3.25006	6.89251	3.44987	0.512195	0.388578	-	0.221963	0.715123	-	-0.43849	0.035345	-
		BniMED5-2	BniB07g048400	1.16378	0.745179	0.192209	2.29999	2.6861	3.91578	0.550933	0.639188	0.278943	0.700389	2.96729	0.489688	1.46676	0.011866	up	-0.407069	0.556089	-	-2.01642	2.38e-09	down
	MED25	BniMED25-1	BniB03g018400	11.8567	8.47054	2.85843	16.9466	19.6512	18.4285	10.0894	10.2303	9.17581	7.72855	18.3421	9.83184	0.621503	0.172015	-	0.425443	0.349908	-	-0.33735	0.024208	-
		BniMED25-2	BniB04g040670	2.73167	1.65098	1.0156	3.1284	2.7258	3.30353	2.61057	2.0368	1.48866	1.79942	3.05257	2.04534	0.08012	0.885503	-	0.186499	0.747552	-	-0.0254	0.953939	-
	Transporter
	BAT5	BniBAT5-1	BniB08g037040	1.61018	3.37421	2.14877	25.098	53.5858	28.5647	22.3757	49.217	58.4497	2.37772	35.7495	43.3475	3.03857	1.19e-08	up	4.01904	1.58187e-11	up	0.868936	0.048269	-
		BniBAT5-2	BniB08g049400	2.75602	4.92312	1.69153	22.0214	57.7655	30.0177	25.0821	45.3674	55.8937	3.12355	36.6015	42.1144	2.76635	3.98e-07	up	3.70238	7.28387e-12	up	0.799049	0.067741	-
	SULTR1;1	BniSULTR1;1	BniB05g033180	0.840089	3.81957	2.20045	0	0.1514	0.091499	0.057467	0	0.028452	2.2867	0.0809663	0.0286397	-5.29172	8.53e-08	down	-6.00265	3.54784e-09	down	-	-	-
	SULTR1;2	BniSULTR1;2-1	BniB05g074030	32.5394	13.1665	13.672	0	0	0.047584	0.468157	0.202494	0.293999	19.7927	0.0158613	0.32155	-10.4362	2.31e-34	down	-5.82723	1.98393e-32	down	-	-	-
		BniSULTR1;2-2	BniB03g057280	5.76088	6.62736	2.29751	0.409583	0.44798	0.530629	1.27688	0.423724	0.705067	4.89525	0.462731	0.801891	-3.99049	8.89e-12	down	-2.52354	6.93431e-05	down	-	-	-
		BniSULTR1;2-3	BniB03g057270	10.1403	8.08882	2.72491	0.7067	0.76978	0.887916	1.90258	0.563211	0.55222	6.98467	0.788132	1.006	-3.6984	5.86e-12	down	-2.64148	7.46693e-05	down	-	-	-
	GTR1	BniGTR1-1	BniB06g024230	131.292	201.715	37.3364	22.3265	12.5706	12.0468	5.83095	6.67568	17.4184	123.448	15.648	9.97501	-3.54644	1.8e-09	down	-3.4455	4.52986e-07	down	-0.05316	0.929755	-
		BniGTR1-2	BniB08g061180	532.979	423.121	280.337	16.3731	9.65831	12.3284	48.0245	32.6028	36.4386	412.145	12.7866	39.022	-5.67024	8.14e-65	down	-3.41115	4.84009e-31	down	2.12799	3.89e-14	up
		BniGTR1-3	BniB05g052360	0.545777	1.46702	0.338766	0.077557	0.13737	0.145636	0.242106	0.260996	0.197149	0.783856	0.120188	0.233417	-	-	-	-	-	-	-	-	-
	GTR2	BniGTR2-1	BniB04g002130	244.855	305.521	77.8782	45.6992	33.9218	21.641	31.8871	22.5711	29.4217	209.418	33.754	27.96	-3.22752	6.64e-10	down	-2.82312	1.32357e-09	down	0.271872	0.472985	-
		BniGTR2-2	BniB06g010940	619.279	514.288	213.406	59.736	36.0322	40.0481	36.544	37.6956	61.459	448.991	45.2721	45.2329	-3.91775	1e-22	down	-3.21481	1.51976e-13	down	0.561665	0.137001	-
		BniGTR2-3	BniB07g041760	61.4435	45.5711	13.7258	41.7909	26.3839	23.476	6.02057	6.36095	5.99414	40.2468	30.5503	6.12522	-0.98033	0.071086	-	-2.59846	3.56412e-09	down	-1.75647	2.57e-09	down
	Note: "-" represents that the expression of the gene has not been detected in the corresponding organ, or the foldchange and statistical analysis cannot be performed due to the poor reproducibility of the gene expression among the three biological replicates.
